# Supplementary material for: Meta-analysis of epigenome-wide association studies in neonates reveals widespread differential DNA methylation associated with birthweight
Source: Nat Commun. 2019 Apr 23;10:1893. doi: 10.1038/s41467-019-09671-3 (PMC6478731; doi:10.1038/s41467-019-09671-3)
Supplement: Supplementary file 4 — Supplementary Data 1 [file 41467_2019_9671_MOESM4_ESM.xlsx]

## Sheet: SData1
Supplementary Data 1. Characteristics of the participating studies in the main meta-analysis (A), the look-up in blood samples taken later in life (B) and the sensitivity model without exclusions of preterm births, pre-eclampsia or maternal diabetes (C)
A.
Study	N total	Normal birthweight	High birthweight	Birthweight (g)	Gestational age (wk)	Ancestry	Boys
ALSPAC	633	547 (86.4)	79 (12.5)	3512 ± 443	39.7 ± 1.3	European	301 (47.6)
CBCa
Hispanic	127	106 (83.5)	19 (15.0)	3445 ± 484	39.8 ± 1.3	Hispanic	74 (58.3)
Caucasian	136	108 (79.4)	26 (19.1)	3625 ± 472	39.7 ± 1.5	European	79 (58.1)
CHAMACOS	283	236 (83.4)	44 (15.5)	3520 ± 446	39.3 ± 1.2	Hispanic	142 (50.1)
CHSa	199	168 (84.4)	28 (14.1)	3486 ± 476	40.2 ± 1.2	Mixed	79 (39.7)
EARLI	131	113 (86.3)	16 (12.2)	3507 ± 480	39.3 ± 1.0	Mixed	70 (53.4)
EXPOsOMICS Rhea, Environage and Piccolipiu	324	297 (91.7)	22 (6.8)	3368 ± 437	39.4 ± 1.2	European	169 (52.1)
GECKO	255	206 (80.8)	46 (18.0)	3543 ± 533	39.7 ± 1.3	European	136 (53.3)
Gen3G	162	145 (89.5)	15 (9.3)	3408 ± 431	39.5 ± 1.1	European	74 (45.7)
Generation R	717	589 (82.1)	122 (17.0)	3572 ± 465	40.2 ± 1.1	European	372 (51.9)
GOYAb	947	649 (68.5)	294 (31.0)	3750 ± 501	40.4 ± 1.3	European	483 (51.0)
Healthy Start
African American	77	-	-	3059 ± 358	38.9 ± 1.3	African American	42 (54.5)
Hispanic	115	-	-	3322 ± 395	39.1 ± 1.1	Hispanic	55 (47.8)
Caucasian	240	220 (91.7)	14 (5.8)	3325 ± 425	39.3 ± 1.1	European	125 (52.1)
INMA	166	-	-	3297 ± 400	39.9 ± 1.2	European	82 (49.4)
IOW F2	118	97 (82.2)	17 (14.4)	3432 ± 525	39.7 ± 1.6	European	59 (50.0)
MoBa1	1066	795 (74.6)	251 (23.5)	3644 ± 544	39.5 ± 1.6	European	568 (53.3)
MoBa2	587	435 (74.1)	146 (24.9)	3701 ± 487	40.1 ± 1.2	European	329 (56.0)
MoBa3	205	153 (74.6)	51 (24.9)	3706 ± 491	39.8 ± 1.2	European	106 (51.7)
NCLa	792	592 (74.7)	192 (24.2)	3671 ± 506	40.0 ± 1.3	European	453 (57.2)
NEST
African American	99	-	-	3197 ± 534	39.3 ± 1.2	African American	47 (47.5)
Caucasian	111	94 (84.7)	13 (11.7)	3446 ± 471	39.5 ± 1.2	European	50 (45.0)
NHBCS	96	84 (87.5)	12 (12.5)	3509 ± 453	39.6 ± 1.1	European	53 (55.2)
PREDO	540	428 (79.3)	99 (18.3)	3572 ± 478	40.1 ± 1.2	European	264 (48.8)
PRISM	138	-	-	3385 ± 441	39.5 ± 1.1	Mixed	76 (55.1)
PROGRESS	143	-	-	3124 ± 387	38.6 ± 1.1	Hispanic	77 (53.8)
RICHS	89	52 (58.4)	23 (25.8)	3335 ± 734	38.9 ± 1.2	European	35 (39.3)
Project Viva	329	263 (79.9)	64 (19.5)	3623 ± 473	40.0 ± 1.2	European	168 (51.1)
N total	8825	6377	1593
B.
Study	N total	Normal birthweight	High birthweight	Age at blood collection (y)	Birthweight (g)	Gestational age (wk)	Ancestry	Boys
Childhood (<13y)	2756	2313	402
ALSPACc	605	522 (86.3)	76 (12.6)	7.5 ± 0.1	3513 ± 444	39.7 ± 1.3	European	294 (48.6)
BAMSE	355	277 (78.0)	76 (21.4)	8.3 ± 0.5	3636 ± 471	39.8 ± 1.3	European	191 (53.5)
CHAMACOSc	191	159 (83.2)	32 (16.8)	9.2 ± 0.3	3522 ± 429	39.2 ± 1.2	Mexican American	90 (47.1)
FLEHS1	82	72 (87.8)	10 (12.2)	10.6 ± 0.3	3439 ± 473	39.4 ± 1.1	European	45 (54.9)
Gambia	212	194 (91.5)	3 (1.4)	2.01 ± 0.02	3041 ± 377	40.4 ± 1.2	African	112 (52.8)
Generation Rc	372	293 (78.8)	76 (20.4)	9.8 ± 0.3	3603 ± 468	40.2 ± 1.3	European	192 (51.6)
Glakud	215	176 (81.9)	36 (16.7)	12.4 ± 0.5	3602 ± 444	40.1 ± 1.1	European	99 (45.8)
PIAMA	207	164 (79.2)	33 (15.9)	8.1 ± 0.3	3504 ± 537	39.7 ± 1.5	European	104 (50.2)
STOPPAe	249	249 (100.0)	-	12.5 ± 1.3	2956 ± 377	38.2 ± 1.0	European	132 (53.0)
Project Vivac	268	207 (77.2)	60 (22.4)	7.8 ± 0.7	3653 ± 465	39.9 ± 1.2	European	138 (51.5)
Adolescence (16-18y)	2906	2437	427
ALSPACc	526	456 (86.7)	66 (12.5)	17.1 ± 1.0	3514 ± 435	39.8 ± 1.3	European	249 (47.3)
BAMSE	204	157 (77.0)	45 (22.1)	16.7 ± 0.3	3616 ± 499	39.9 ± 1.3	European	114 (55.9)
IOW F1	234	208 (88.9)	26 (11.1)	17.7 ± 0.5	3486 ± 441	40.2 ± 1.0	European	82 (35.0)
NFBC86	492	390 (79.3)	98 (19.9)	16.1 ± 0.4	3629 ± 451	40.2 ± 1.1	European	234 (47.6)
PIAMA	640	513 (80.2)	108 (16.9)	16.4 ± 0.2	3546 ± 538	39.9 ± 1.6	European	315 (49.2)
Raine	810	713 (88.0)	84 (10.4)	17.0 ± 0.3	3460 ± 450	40.0 ± 1.1	European	419 (51.7)
Adulthood (≥30y)	1616	1391	196
Lifelines	745	635 (85.2)	93 (12.5)	45.2 ± 10.2	3469 ± 553	40.1 ± 0.9	European	353 (47.4)
NFBC66	696	581 (83.5)	103 (14.8)	31.0 ± 0.3	3540 ± 487	40.4 ± 1.5	European	305 (43.8)
NTRe	175	175 (100.0)	-	30.5 ± 4.7	2771 ± 415	39.0 ± 1.4	European	61 (34.9)
C.
Study	N total	Normal birthweight	High birthweight	Low birthweight	Birthweight (g)	Gestational age (wk)	Ancestry	Boys	Preterm	Pre-eclampsia	Diabetes
ALSPAC	671	572 (85.2)	83 (12.4)	16 (2.4)	3486 ± 471	39.6 ± 1.5	European	324 (52.5)	19 (2.8)	12 (1.8)	3 (0.4)
EXPOsOMICS Rhea, Environage and Piccolipiu	368	334 (90.8)	22 (6.0)	12 (3.3)	3322 ± 465	39.1 ± 1.6	European	195 (53)	33 (9.0)	2 (0.5)	23 (6.3)
Generation R	870	700 (80.5)	154 (17.7)	16 (1.8)	3557 ± 501	40.2 ± 1.4	European	457 (52.5)	23 (2.6)	19 (2.2)	15 (1.7)
MoBa1	989	729 (73.7)	241 (24.4)	19 (1.9)	3643 ± 544	39.9 ± 1.6	European	526 (53.2)	36 (3.6)	32 (3.2)	18 (1.8)
MoBa2	642	469 (73.1)	155 (24.1)	18 (2.8)	3654 ± 537	40.0 ± 1.6	European	363 (56.5)	30 (4.7)	30 (4.7)	2 (0.3)
NCLa	842	617 (73.3)	193 (22.9)	32 (3.8)	3603 ± 578	39.6 ± 1.8	European	476 (56.5)	50 (5.9)	0	0
NEST - Caucasian	145	118 (81.4)	15 (10.3)	12 (8.3)	3330 ± 569	38.8 ± 2.1	European	67 (46.2)	18 (12.4)	7 (4.8)	17 (11.7)
PREDO	791	601 (76)	152 (19.2)	38 (4.8)	3548 ± 557	39.8 ± 1.6	European	373 (47.2)	32 (4.5)	60 (7.6)	191 (24.1)
RICHS	96	57 (59.4)	24 (25.0)	15 (15.6)	3315 ± 736	39.0 ± 1.1	European	38 (39.6)	0	0	7 (7.3)
N total	5414	4197	1039	178
Results are presented as mean ± SD or N (%). Normal birthweight: 2500 - 4000 g, high birthweight: > 4000 g, low birthweight: <2500 g. g: grams, wk: weeks, y: years. Full study names can be found in study-specific eMethods. For some cohorts the sample size for defining normal/high BW was too small. a) CBC, CHS and NCL used heel prick blood spot samples instead of cord blood. b) GOYA is a case-cont…
