# Supplementary material for: Meta-analysis of epigenome-wide association studies in neonates reveals widespread differential DNA methylation associated with birthweight
Source: Nat Commun. 2019 Apr 23;10:1893. doi: 10.1038/s41467-019-09671-3 (PMC6478731; doi:10.1038/s41467-019-09671-3)
Supplement: Supplementary file 5 — Supplementary Data 2 [file 41467_2019_9671_MOESM5_ESM.xlsx]

## Sheet: SData2
Supplementary Data 2. Main meta-analysis results from 8170 CpGs with FDR siginificant association between methylation levels and continuous birth weight in grams (first 1029 CpGs are Bonferroni significant, P<1.06*10-7) Coefficients (coef), standard errors (SE) and 95% confidence intervals (CI) are presented per 10% increase in methylation level. Chr: chromosome GOYA is a case-control study where…
CpG	Chr	Nearest gene	Coef	SE	95% CI	P value	Direction of effect across cohorts	I-squared
cg20076442	8	MSC	-91.2927	7.33994	-105.679 , -76.9064	1.63e-35	---------------?------------	68.9
cg17714703	19	UHRF1	130.196	10.5635	109.4918 , 150.9006	6.63e-35	+++-+++++++--+-++++++-++++++	49.3
cg25953130	10	ARID5B	-76.3385	6.26435	-88.6166 , -64.0604	3.68e-34	---+--------+-+-------------	55.8
cg04872675	12	TMEM119	107.126	9.50657	88.4932 , 125.759	1.87e-29	+++++-+++++-++++++-+++++++++	35.7
cg12798040	14	XRCC3	109.404	9.7322	90.3294 , 128.4796	2.55e-29	+++-++++++++++++++++++-+++++	42.1
cg25124943	10	KLF6	-110.132	9.82451	-129.3877 , -90.8756	3.65e-29	---+?-------+---------------	69.8
cg08404702	16	TSC2	88.6397	8.0114	72.9373 , 104.342	1.87e-28	+++-+++++++--++?++++-+++++++	31.8
cg00049440	9	KLF9	-84.111	7.63149	-99.0687 , -69.1533	3.01e-28	------------+-+?------------	51.9
cg13758780	9	DAB2IP	119.873	11.4531	97.4253 , 142.3216	1.23e-25	+++++++++++++++?++++++++++++	35.1
cg18804667	5	PDE4D	60.3965	5.82834	48.973 , 71.8201	3.67e-25	+++++++++++++++++++++-+-+-++	12.4
cg07144560	5	CSNK1A1	-116.516	11.7166	-139.4807 , -93.5517	2.66e-23	---+?-------+-+-------+-----	47.4
cg13280041	6	NHSL1	97.466	9.81409	78.2304 , 116.7016	3.05e-23	++++++++++++-+++++++++++++++	0
cg12723026	1	KCNC4	68.5906	7.10595	54.663 , 82.5183	4.79e-22	+++++-+++++++++++++++-++-+-+	41.2
cg02863179	10	ARID5B	-58.3608	6.18	-70.4736 , -46.248	3.61e-21	---+-------++-+-------+-----	58.2
cg25325512	6	PIM1	57.3859	6.07941	45.4703 , 69.3016	3.75e-21	++--++++++++++++++++---++-++	51.4
cg11303839	7	CCL26	-48.9566	5.21724	-59.1824 , -38.7308	6.38e-21	---+-------+----------------	0
cg00442282	17	RARA	-163.172	17.4047	-197.2857 , -129.0591	6.91e-21	------------------+---------	46.5
cg02983090	16	IL21R	-70.5337	7.54121	-85.3145 , -55.7529	8.51e-21	---+-+--------+--+----------	38
cg24559796	7	JAZF1-AS1	-91.1018	9.75982	-110.2311 , -71.9726	1.02e-20	-----------+---+--+-+-+-----	33.1
cg17850088	1	VPS45	67.7803	7.35806	53.3585 , 82.2021	3.21e-20	+++++++++++++++?++++++?++-?+	24.9
cg13904214	7	RBM33	103.281	11.2315	81.2673 , 125.2949	3.73e-20	++++++++++++-+++++++++++++++	11.8
cg14651616	11	MAP4K2	159.031	17.3092	125.1049 , 192.9571	4.02e-20	+-+++++++++-++++++++++++++++	57.4
cg11138362	1	PRDM16	102.074	11.2249	80.0731 , 124.0748	9.59e-20	+++??++++++++++?+++++--+++-+	21.4
cg13492133	1	SMG7	77.674	8.56937	60.878 , 94.47	1.26e-19	++++++++++++-+++++-+++++++++	28.7
cg08005122	11	ARHGAP20	-136.324	15.1263	-165.9717 , -106.6765	2.02e-19	------------+-+---+---+-----	53.5
cg20752878	17	ASGR1	88.3515	9.81084	69.1223 , 107.5807	2.15e-19	+++?+++++++-+++?+++++-++++++	8.6
cg14459032	9	PCSK5	-95.5379	10.6493	-116.4105 , -74.6654	2.93e-19	---??----------------+------	19.3
cg13586051	3	DNASE1L3	-84.3884	9.41157	-102.8351 , -65.9418	3.06e-19	--------------+?------------	38.7
cg00531137	16	ADGRG1	-77.3448	8.65585	-94.3103 , -60.3793	4.05e-19	---+--------+-+-----+-+-----	55
cg00587472	2	CMPK2	-68.9217	7.78486	-84.1801 , -53.6634	8.5e-19	----?------+---?-+----+-----	37.2
cg02149899	11	THAP12	103.372	11.7186	80.4038 , 126.3405	1.13e-18	+++++-+++++--++-++++++-+++++	10.6
cg06673684	13	MCF2L	62.4435	7.1511	48.4274 , 76.4597	2.5e-18	+++?+-++++++++++++++++-+++-+	14
cg14097568	1	ARHGAP29	-75.8041	8.68339	-92.8236 , -58.7847	2.55e-18	-----------++-+?------------	62.2
cg08282819	16	IL21R	-71.1435	8.18865	-87.1932 , -55.0937	3.69e-18	---+----------+--+----------	45.5
cg12781678	7	C7orf61	89.6953	10.3311	69.4463 , 109.9443	3.89e-18	+++++-+++++-+++-++++-+++++-+	5.9
cg06378491	11	MAP4K2	178.166	20.5524	137.8833 , 218.4487	4.36e-18	+-+++-+++++--+++++-+-+++++++	42.9
cg10317026	1	EFNA3	-173.975	20.0935	-213.3579 , -134.5914	4.79e-18	-------+------++------------	40.5
cg08080174	16	ZFHX3	-115.008	13.2888	-141.0546 , -88.9624	4.95e-18	+---+----------------++-----	52.8
cg10073091	1	DHCR24	-183.073	21.1832	-224.5918 , -141.5537	5.51e-18	------------------+---+-----	0
cg10829227	19	PRKD2	98.4727	11.4213	76.0871 , 120.8584	6.59e-18	++++++++++++++++++++-+++++-+	2.7
cg07397493	11	MRPL23-AS1	101.59	11.8396	78.3848 , 124.7959	9.44e-18	++++++++++++-+++++++++++++++	5.6
cg20068209	6	TMEM30A	-60.943	7.10878	-74.8763 , -47.0098	1.01e-17	----?+--------+?-++---------	70.4
cg24324628	6	NHSL1	111.323	12.9861	85.8701 , 136.7757	1.01e-17	++++++++++++-++-++++++++++-+	9.8
cg19379721	19	LPAR2	98.7666	11.5236	76.1804 , 121.3528	1.03e-17	++++?-++++++++-+++++++-+++++	22.1
cg10372921	15	LOXL1-AS1	87.6787	10.2586	67.5718 , 107.7856	1.27e-17	++++++++++++-++-++++--++--++	7.8
cg17782974	10	TRIM8	69.7212	8.18189	53.6847 , 85.7577	1.58e-17	+++-+++++++-++++++++++++++++	1
cg21058822	8	MIR548O2	-59.2561	6.98383	-72.9444 , -45.5678	2.16e-17	-----------+---?--------?---	32.3
cg22877366	1	MIIP	68.0042	8.01567	52.2935 , 83.7149	2.18e-17	+++++-+++-++++--++++-+++++++	44.5
cg26191447	2	GLS	-83.5329	9.88106	-102.8998 , -64.166	2.82e-17	-+----------+-+-------------	21.8
cg00472758	16	TBC1D24	102.341	12.1435	78.5402 , 126.1427	3.53e-17	+++++--++++--+++++++-+++++++	52.9
cg15233611	12	SETD1B	96.6555	11.5094	74.0971 , 119.2138	4.54e-17	+++-++++-+++++++++++---+++-+	30.8
cg00376553	7	TSC22D4	83.4173	9.98033	63.8559 , 102.9787	6.37e-17	+++-++++-++-++++++++-+++-+++	50.9
cg00028013	15	LOXL1-AS1	85.2948	10.2217	65.2602 , 105.3294	7.16e-17	++-+++++++++-+++++++-+-+++++	25.4
cg14774305	5	WNT8A	-129.708	15.546	-160.178 , -99.2378	7.21e-17	-----------+------+---------	39
cg04521626	17	PLD2	-70.8225	8.49976	-87.482 , -54.163	7.93e-17	---------------?-+---------+	59.9
cg04968127	11	MRVI1	95.4281	11.466	72.9546 , 117.9016	8.6e-17	+++-+-+++++--+--++++++++++++	23.1
cg10117369	1	LAX1	-72.7237	8.73809	-89.8504 , -55.5971	8.6e-17	---+----------+-------+-----	47.4
cg14096899	2	LOC150935	64.1433	7.74398	48.9652 , 79.3216	1.2e-16	++++++++++++++++++-+++++++++	28.8
cg20782117	7	SLC25A13	-74.9787	9.07947	-92.7744 , -57.1829	1.48e-16	------------+-+?-++---------	51.7
cg01715745	1	SSBP3	-93.7105	11.4045	-116.0633 , -71.3576	2.09e-16	----+----------------++-----	50.7
cg02753354	19	ARHGAP45	-106.582	12.9979	-132.0581 , -81.1065	2.4e-16	-----------+----------------	0
cg21995347	5	SNX18	76.286	9.32993	57.9994 , 94.5727	2.92e-16	++-+++++++++--+?++++++-+++++	20
cg03162410	19	TECR	142.857	17.5456	108.4679 , 177.2468	3.89e-16	++-?+-+++++-++++++++-+-+++++	45.9
cg22590761	15	LOXL1-AS1	95.8526	11.8315	72.6629 , 119.0423	5.43e-16	++-++++++++++++-++++-+++++++	12.8
cg26438325	7	JAZF1	-85.2732	10.5511	-105.9533 , -64.5931	6.37e-16	---+?+------+-+-------------	63.9
cg01515508	1	CASZ1	83.5364	10.3921	63.1679 , 103.9049	9.1e-16	+++++-++++++-+++++++-+++++-+	0
cg11268834	2	MRPL44	90.0493	11.2097	68.0783 , 112.0202	9.5e-16	+++-++++-++-++-++++++-++++++	24.9
cg23902550	8	TIGD5	142.723	17.786	107.8629 , 177.584	1.02e-15	++++++++++++++++++++---+++-+	27.4
cg02194129	14	XRCC3	69.2415	8.63679	52.3134 , 86.1696	1.08e-15	+-+-++++++++++++++++-+-+++++	70.4
cg05304729	1	MNDA	65.6985	8.21028	49.6063 , 81.7906	1.22e-15	+++-++++++++-+++++++++++++++	73.5
cg19260606	1	KAZN	-60.5197	7.57155	-75.3599 , -45.6795	1.32e-15	-+--?-+---------------+---+-	41.8
cg11370064	3	ROBO1	62.4396	7.81286	47.1264 , 77.7528	1.33e-15	++++?+++++++-++++++++-++++++	30
cg23414595	22	ZMAT5	70.1684	8.79171	52.9366 , 87.4001	1.45e-15	+++-+-++++++++++++++-++++--+	54.9
cg23917006	1	CLDN19	97.5962	12.2393	73.6071 , 121.5854	1.54e-15	++++-+++-++--++?++++-+-+++++	55.9
cg07732037	12	MPHOSPH9	56.4223	7.07731	42.5508 , 70.2938	1.56e-15	-+++-+++++++-+-++++++-++++?+	47.9
cg27217742	4	RGS12	92.0972	11.5977	69.3657 , 114.8287	2.01e-15	+++++-++++++-+++++++-+++++-+	9.6
cg03173827	20	TCEA2	113.299	14.2768	85.3167 , 141.2817	2.09e-15	++++++++++++-+++++++++++++-+	0
cg01877936	6	ECI2	-59.2559	7.46867	-73.8945 , -44.6173	2.12e-15	-----------+---?-+----------	0.7
cg09294084	13	MCF2L	61.6743	7.78447	46.4167 , 76.9318	2.32e-15	+++-++++++++++++++-+++-+-+++	21.4
cg20652404	15	LOXL1-AS1	85.9202	10.8571	64.6402 , 107.2001	2.5e-15	++++++++++++++++++++++++--++	24.7
cg18183624	17	IGF2BP1	52.0004	6.58724	39.0894 , 64.9114	2.92e-15	+++++-++-+++++++++++++++-+++	56.3
cg15283950	11	MRVI1	87.6343	11.1143	65.8502 , 109.4184	3.15e-15	+++-+-+++++--++-++++--+++--+	26.1
cg04228709	6	TIAM2	62.1769	7.88895	46.7145 , 77.6392	3.23e-15	++++++++++++-+++++-++-++-+++	50.5
cg17520654	12	EMP1	-80.6649	10.2383	-100.732 , -60.5978	3.31e-15	---------------?------------	52.5
cg15681239	3	DLEC1	-51.8293	6.58543	-64.7368 , -38.9219	3.54e-15	--+-?------++-+--++---+-----	58.4
cg18702935	13	SUCLA2	-94.587	12.0194	-118.1451 , -71.0289	3.56e-15	----+---------+------++-+---	47.3
cg12022621	1	LAX1	-68.9581	8.77164	-86.1505 , -51.7656	3.8e-15	---+----------+-------+-----	60.4
cg17353337	6	NHSL1	83.6651	10.6615	62.7686 , 104.5616	4.25e-15	++++++++++++-++-++++++++++++	0
cg15962969	6	NHSL1	88.7271	11.3077	66.564 , 110.8902	4.28e-15	++++++++++++-++-+++++++++-++	0
cg09695430	11	WT1	-74.8836	9.57069	-93.6421 , -56.125	5.11e-15	--++-----------------------+	4.5
cg00218409	2	SEMA4F	-131.629	16.8512	-164.6571 , -98.6006	5.66e-15	------------+---------+-----	24.9
cg25162533	17	METRNL	60.8758	7.80363	45.5807 , 76.1709	6.14e-15	+--++++++++--+-?++++-+++++++	46.5
cg20219891	2	GLI2	-23.4936	3.02638	-29.4253 , -17.5619	8.3e-15	---+----------------+++-++--	27.6
cg00066351	7	LINC00996	-74.3706	9.58794	-93.163 , -55.5783	8.72e-15	----------------------------	36.6
cg00395063	11	ARHGEF12	105.994	13.6721	79.197 , 132.7915	9e-15	+++++-++--+-+++++++++-++--++	49.2
cg07738730	17	IGF2BP1	59.9581	7.75003	44.768 , 75.1481	1.02e-14	+++++-++-+++++++++++++++++++	54.5
cg07807757	7	GRB10	-89.3213	11.5535	-111.9661 , -66.6765	1.07e-14	----?------+--+---+-++------	42.2
cg09476997	16	SLC9A3R2	50.2933	6.51167	37.5304 , 63.0561	1.13e-14	+++++-++++++-+-+++-+-+++++++	12.8
cg07677157	12	RPSAP52	-47.8454	6.19789	-59.9932 , -35.6975	1.17e-14	--+--+-?----+--?------------	10.5
cg05119988	4	MSMO1	-57.4884	7.46592	-72.1216 , -42.8552	1.36e-14	------------+-+---+---------	43.5
cg07317017	15	LOXL1-AS1	94.9021	12.3287	70.7379 , 119.0663	1.39e-14	+++++++++++++++-++++-+++-+++	3.5
cg17836177	8	PEBP4	100.028	13.0059	74.5365 , 125.5195	1.46e-14	+++++++++++--++?+++++-+-+--+	51.6
cg21611682	11	LRP5	90.8578	11.819	67.6926 , 114.023	1.5e-14	+++++++++?++++-+++++++++++++	58.6
cg01418153	1	PRDM16	71.1569	9.26038	53.0065 , 89.3072	1.54e-14	+++--++++++++++?++-+++-+++-+	55.2
cg09888330	1	SH2D2A	132.401	17.2341	98.6225 , 166.1801	1.56e-14	+++++++++-+--++?++-++++++-++	38.4
cg22246785	12	KDM2B	-82.1869	10.7011	-103.161 , -61.2127	1.59e-14	-----------+---------------+	18.9
cg14195992	8	SPIDR	102.733	13.3844	76.4992 , 128.966	1.65e-14	+++++++++++++++-++++++-+++++	29.4
cg00654448	8	GPR20	-132.988	17.3277	-166.95 , -99.0254	1.66e-14	----++-+------+?-++--++-----	57.8
cg08108224	6	PRIM2	-83.4411	10.8918	-104.789 , -62.0933	1.85e-14	--+?-------+--+---?---+-----	32.5
cg01400685	11	FADS2	-75.3564	9.85057	-94.6635 , -56.0493	2.01e-14	------------+---------------	43.2
cg26950531	19	DPF1	-54.2155	7.09091	-68.1137 , -40.3174	2.08e-14	-------+----+-+--+----+---?-	39.4
cg12594244	15	LOXL1-AS1	107.97	14.1281	80.2794 , 135.6615	2.14e-14	+++++++++++++++-++++-+++++++	7.7
cg23494863	8	STAR	-89.5653	11.7256	-112.5474 , -66.5832	2.2e-14	-----------------+---+------	22.4
cg13742400	2	DOCK10	-88.784	11.6354	-111.5893 , -65.9787	2.34e-14	------+-+--+--------+---+---	28
cg13687834	10	PITRM1	-55.2256	7.24561	-69.427 , -41.0242	2.5e-14	--------------------------?-	32.1
cg23237276	14	MIR1247	62.9783	8.2871	46.7356 , 79.221	2.97e-14	+-+++-++++++-+-+++++-+++++++	23.7
cg00153395	1	JAK1	81.0181	10.6679	60.109 , 101.9272	3.09e-14	+++++++++++++++?++-+++-+++-+	33.4
cg12547807	1	SPSB1	-105.687	13.9753	-133.0787 , -78.2954	3.96e-14	---+--------+-----+---+-----	33.5
cg10453071	16	DOK4	91.3475	12.1043	67.6231 , 115.0719	4.46e-14	+++++++++++++++-++++-+-+++-+	3.7
cg02704502	11	H19	65.6009	8.7026	48.5438 , 82.658	4.77e-14	++++++++++++-+--++++++++++++	0
cg00119811	5	ARHGEF28	-107.271	14.2383	-135.1778 , -79.3638	4.92e-14	-------+---+----------------	41.5
cg18489994	4	C1QTNF7	-88.3138	11.7461	-111.3361 , -65.2916	5.54e-14	---+--------+---------+-+---	13.5
cg24020157	10	RASGEF1A	-67.2128	8.95792	-84.7703 , -49.6553	6.23e-14	----?----------?------+-----	7.8
cg07810039	1	TGFB2	-50.1439	6.68818	-63.2528 , -37.0351	6.51e-14	--------------+?-++---------	64.3
cg23032421	3	IL5RA	-47.5459	6.34322	-59.9786 , -35.1132	6.6e-14	--++--------+-++-----++-----	49.3
cg05056497	21	RCAN1	-49.0508	6.54555	-61.8801 , -36.2216	6.69e-14	---++------++---------+-----	0
cg26627956	2	CFLAR	86.9748	11.6347	64.1707 , 109.7789	7.7e-14	++++++++++++-+++++-+++++++++	16.5
cg07340025	5	ANKH	-55.5131	7.42737	-70.0708 , -40.9555	7.77e-14	-+-+--------------+--+------	13
cg09915396	17	RAP1GAP2	-86.4974	11.5818	-109.1978 , -63.797	8.12e-14	-----------------+----+-----	26.1
cg25164589	10	C10orf107	-63.2983	8.49173	-79.9421 , -46.6545	9.05e-14	--+---------------+---+-----	45.9
cg21516291	20	SLC35C2	96.6439	12.9672	71.2283 , 122.0596	9.13e-14	+++--+++-++-++++++++++-+++++	43.2
cg11171811	11	LTBP3	101.232	13.6088	74.5587 , 127.9053	1.02e-13	++++++++++++-+++++-+-+-++--+	50.8
cg14435807	15	LOXL1-AS1	102.493	13.814	75.4177 , 129.5688	1.18e-13	+--+++++++++++++++++++++++++	10.6
cg14292823	8	TIGD5	117.071	15.8124	86.0788 , 148.0633	1.32e-13	++++++++++++++-+++++----+--+	35.6
cg21805179	12	MPHOSPH9	55.8209	7.57966	40.9648 , 70.6771	1.78e-13	+++++++?++++-+-+++++--++++++	0
cg22908922	14	PACS2	79.5882	10.8166	58.3877 , 100.7887	1.87e-13	+++++++++++--+-+++-+-+-+++++	43.5
cg05779272	9	B4GALT1	135.717	18.4611	99.5333 , 171.9009	1.96e-13	++-++++++++--+++++++++++++-+	40.8
cg12036735	8	LZTS1-AS1	-62.1711	8.45924	-78.7512 , -45.591	1.99e-13	----?---------+?-+-----+----	61.3
cg14548802	9	COL5A1	61.2361	8.33917	44.8913 , 77.5809	2.09e-13	+++-++++++++-+-++++++--+++++	21.8
cg12036877	1	PMF1-BGLAP	67.6848	9.25534	49.5443 , 85.8252	2.61e-13	+---+-++++++-+++++++-+-+++-+	25.1
cg23944298	3	TPRA1	-72.9023	9.97749	-92.4582 , -53.3465	2.74e-13	----?+---------?------------	57.3
cg17442852	17	SLC43A2	59.4537	8.1399	43.4995 , 75.4079	2.79e-13	+++++-++++++-+--++-+++++++-+	29.4
cg12804755	11	SOX6	-51.8977	7.10603	-65.8255 , -37.9699	2.81e-13	---+--------+---------+-----	27.7
cg00942920	1	LAX1	-59.1074	8.09499	-74.9736 , -43.2412	2.84e-13	---+------------------+-----	39.4
cg01063280	6	SEC63	-82.3449	11.289	-104.4714 , -60.2184	3e-13	---??------+--------++------	29.9
cg01815912	16	NTHL1	90.1693	12.3641	65.9357 , 114.403	3.04e-13	+--++-++++++++-+++++-+++++-+	39.4
cg03996020	7	DNAJB6	52.2346	7.16591	38.1894 , 66.2798	3.12e-13	+++?+-++++++++--+++++-+++-++	13.2
cg00329157	3	C3orf52	-102.897	14.1332	-130.5985 , -75.1962	3.33e-13	-++--------++-+-----++------	28.5
cg05993265	4	MFSD10	102.587	14.096	74.9592 , 130.2156	3.39e-13	++-++++++++-++++++++-++-++++	53.6
cg04479212	3	ITGA9	70.3144	9.66822	51.3646 , 89.2641	3.52e-13	+++?+-++++++-++?++++---++--+	22.3
cg03747456	12	KRT80	-71.8349	9.88227	-91.2041 , -52.4656	3.62e-13	------------+-+?-++---------	62
cg17142950	1	SAMD13	-61.9082	8.54081	-78.6482 , -45.1682	4.21e-13	-----+-----++--------+------	29.6
cg18536994	17	TMEM235	79.8479	11.0374	58.2146 , 101.4812	4.68e-13	+++++-+++++-++-+++++---+++-+	41.4
cg07105221	7	RADIL	52.2097	7.22356	38.0515 , 66.3678	4.91e-13	++-+++++++++-+--++-++--+++-+	10.1
cg02573176	8	SLC10A5	-60.2995	8.34556	-76.6568 , -43.9422	5e-13	--------+-----+---+---------	38.8
cg04246167	3	C3orf67	-71.9895	9.96407	-91.5191 , -52.4599	5.01e-13	-----------------+----------	43.1
cg18739367	8	FGFR1	-103.841	14.3732	-132.013 , -75.67	5.02e-13	----+---+-----+------+--+---	51.1
cg18584067	2	SERTAD2	-76.6542	10.6234	-97.4761 , -55.8323	5.37e-13	----?---------+?----+-+-----	14.6
cg08447200	22	PANX2	54.4916	7.57343	39.6477 , 69.3355	6.24e-13	+++++++++++-++-?++++++++++-+	0
cg02402882	5	GPBP1	-80.3123	11.1641	-102.1939 , -58.4308	6.3e-13	---+------------------------	45.8
cg06500792	2	LOC400958	-74.7928	10.4089	-95.1943 , -54.3913	6.7e-13	-----+--------+?------------	37.8
cg17298279	6	TMEM181	150.653	20.9725	109.5467 , 191.7588	6.8e-13	+++--++++++-++-++++++--+--++	50.2
cg05575921	5	AHRR	79.0349	11.0066	57.462 , 100.6077	6.94e-13	+++-+++++++++++?++++-++++--+	28.6
cg09321238	1	PRDM16	118.503	16.6006	85.9654 , 151.0396	9.44e-13	++++-+++-++-++++++++++--+-++	44.6
cg12750675	7	BRAF	-67.9873	9.52782	-86.6618 , -49.3128	9.63e-13	----?------+-+-+----+-+----+	33.6
cg13872898	2	GLI2	-25.5947	3.58791	-32.627 , -18.5624	9.78e-13	--------------------+++-++--	37.4
cg22347642	8	GINS4	-82.3912	11.5534	-105.0359 , -59.7466	9.94e-13	--------------++-+---+------	29
cg26750893	2	RMDN2	-59.8864	8.40705	-76.3642 , -43.4085	1.05e-12	-----------+------------+---	0
cg12259522	13	TEX29	99.2244	13.9516	71.8794 , 126.5695	1.14e-12	++++++-+++++++++++-++--+++++	3
cg13740339	9	FBP1	-89.3667	12.5659	-113.9959 , -64.7375	1.15e-12	----+--+-------------------+	0.2
cg19242268	20	TCEA2	95.8158	13.4765	69.4019 , 122.2297	1.16e-12	+++++-++++++++-+++++++--++-+	21.1
cg20449670	1	S100A6	-66.6807	9.38793	-85.0811 , -48.2804	1.22e-12	-+--?------+---?-++---+-----	47.2
cg26129353	18	LOC100505549	-58.34	8.21381	-74.439 , -42.2409	1.22e-12	----?+-----++-+?------------	66.6
cg05438378	15	SMAD3	-56.3829	7.93978	-71.9449 , -40.8209	1.24e-12	------------+-+?--+--+------	55.2
cg00162064	1	RNF220	-61.835	8.72485	-78.9357 , -44.7343	1.37e-12	----?-------+--?------------	30.8
cg07168232	1	LAMB3	-71.2443	10.0578	-90.9576 , -51.531	1.41e-12	-----------++---------------	0
cg19843457	12	SFSWAP	-55.0722	7.77541	-70.312 , -39.8324	1.41e-12	-----+--------------+-+-----	17
cg25324164	11	FADS2	-86.8938	12.297	-110.9959 , -62.7917	1.59e-12	-------+----+-+--+--+-+-----	45.6
cg20717932	17	THRA	-69.3777	9.82135	-88.6275 , -50.1278	1.62e-12	------------+--?------+-+--+	48.5
cg03527802	16	BOLA2	88.7438	12.5656	64.1153 , 113.3724	1.64e-12	-++-+++++++++++-++++---+++-+	39.9
cg05851442	7	HOXA3	55.4971	7.85926	40.0929 , 70.9012	1.65e-12	+++?+++++++--+++++-+++-+++++	13
cg26894079	11	CLMP	-71.4231	10.1202	-91.2586 , -51.5876	1.7e-12	----++------------+---------	45
cg05135499	10	SKIDA1	44.9464	6.39674	32.4088 , 57.484	2.12e-12	++++++++++++++--++++++++++++	20.1
cg00637745	2	GLI2	-20.9489	2.98345	-26.7965 , -15.1013	2.19e-12	---+----------------+++-++--	37
cg27246744	3	OSBPL10	-84.6365	12.0573	-108.2688 , -61.0042	2.23e-12	-----------+------+---+----+	31.3
cg27106909	16	BOLA2	98.0998	13.9833	70.6924 , 125.5072	2.29e-12	+-+++++++++-+++-++++-+++++++	51.9
cg03753191	13	EPSTI1	-91.5229	13.0597	-117.1199 , -65.926	2.42e-12	------------------+-+-+-----	5.8
cg14722693	8	CSGALNACT1	-78.3362	11.192	-100.2726 , -56.3998	2.57e-12	----?+--------+--+----------	36.6
cg07313882	17	TMC6	106.635	15.2382	76.7683 , 136.502	2.6e-12	++-++-+++++-++++++++---++-++	34.6
cg22242842	2	KCMF1	-70.5069	10.0852	-90.2738 , -50.74	2.73e-12	---?-+------+--?-----+------	9.1
cg02462416	11	H19	50.4739	7.22519	36.3125 , 64.6352	2.83e-12	+++++++++++-++-?+++++-++++++	0
cg17711527	1	LAX1	-63.6757	9.11496	-81.541 , -45.8104	2.83e-12	---+----------+-------+-----	48
cg17870997	2	GLI2	-36.9896	5.30138	-47.3804 , -26.599	3.01e-12	---+----------------+++-++--	31.1
cg04070976	17	LLGL2	77.2095	11.0795	55.4937 , 98.9252	3.2e-12	++-+?++++-++-+-+++++++++++++	47
cg03254465	1	PRDM16	53.7225	7.72096	38.5894 , 68.8556	3.45e-12	+++?--+++++-++++++++++-+++-+	34.4
cg20664313	12	FBRSL1	78.3117	11.2549	56.2521 , 100.3713	3.45e-12	++++++++++++-+++++++++--++++	15.6
cg23975840	12	MAP1LC3B2	-51.5532	7.41473	-66.0861 , -37.0203	3.58e-12	--------------------++------	18.6
cg00382138	4	CFI	-51.8281	7.46112	-66.4519 , -37.2043	3.75e-12	-------?------+---+---+----+	37.7
cg17344906	19	NFIX	64.0446	9.22442	45.9648 , 82.1245	3.84e-12	+++++++++++++--?++++++++++++	23.3
cg20692268	1	RUNX3	-56.7547	8.18685	-72.801 , -40.7085	4.14e-12	----?-----+----?-++---+-----	50.9
cg11950754	1	LRP8	74.6701	10.7721	53.5568 , 95.7835	4.16e-12	+++-+-+++++-++++++++-+-+++++	35.3
cg24058805	1	PDE4B	-123.97	17.8943	-159.0431 , -88.8975	4.27e-12	-----+------+-+------+------	15
cg03515844	1	ZBTB17	-50.483	7.28956	-64.7705 , -36.1954	4.35e-12	---+----------+-------+-----	64
cg22057874	2	OSBPL6	-61.9557	8.95309	-79.5038 , -44.4077	4.52e-12	-----+--------+-----+-+-----	34.1
cg19448816	3	PLCL2	-67.6604	9.78254	-86.8342 , -48.4867	4.63e-12	--+---------+-+?--+---+-----	23.6
cg04904815	6	UNC5CL	-108.591	15.7138	-139.3905 , -77.7922	4.83e-12	-----------++-+-------+-----	24.9
cg15171911	18	TCF4	58.791	8.50782	42.1157 , 75.4663	4.84e-12	+-+-++++++++++-++++++--+++++	22
cg23661483	19	ILVBL	80.0618	11.5987	57.3284 , 102.7952	5.1e-12	+-+-++++++++-+++++-+++++++++	23.5
cg27168858	1	DHCR24	-71.3069	10.331	-91.5556 , -51.0583	5.12e-12	-----+-------+----+---------	1.2
cg08420923	16	ANKRD11	64.0575	9.28107	45.8666 , 82.2484	5.13e-12	+++++++++++-++-?++++++++++++	41.6
cg18334681	6	ENPP3	-75.306	10.9262	-96.7214 , -53.8906	5.49e-12	-----+-+------------+-+-----	34.8
cg23147227	12	PTPN6	132.66	19.2481	94.9333 , 170.3859	5.5e-12	+++-++++++++-++?++-++-++++-+	9
cg01585860	6	COL12A1	-75.5443	10.9631	-97.032 , -54.0566	5.55e-12	-----------+---?------------	45.9
cg19478223	4	SCOC	-62.8522	9.1252	-80.7375 , -44.9668	5.67e-12	--+---------+----++-+----+--	50.4
cg01966974	1	BATF3	-60.6614	8.81613	-77.941 , -43.3818	5.96e-12	----?+-----+---?--+-++-----+	44.6
cg24395117	11	CTTN	65.036	9.45553	46.5031 , 83.5688	6.07e-12	++++-+++++++++++++-++-+++--+	37.9
cg17924072	19	ARHGAP45	-58.9472	8.58495	-75.7737 , -42.1207	6.59e-12	---??------+------+-+--+---+	42.8
cg07133097	2	GLI2	-29.1985	4.25795	-37.5441 , -20.8529	7.01e-12	---+-----------+----+++-++--	26.2
cg12419863	6	PLAGL1	-69.7861	10.1842	-89.747 , -49.8251	7.26e-12	-+---------+---?------------	13.9
cg02283735	1	PTPRF	-55.7028	8.13352	-71.6445 , -39.7612	7.46e-12	---------------?------+-+---	4.4
cg02855778	7	PTPRN2	76.8443	11.2292	54.835 , 98.8535	7.74e-12	++++-+++-++-++-+++++++++++++	24.4
cg23719157	15	STRA6	44.6003	6.52023	31.8207 , 57.38	7.9e-12	+++++-++-++--+++++-++++++-++	13.2
cg14177925	14	OR4E2	-75.0117	10.97	-96.5129 , -53.5105	8.04e-12	----+---------------+-+-----	25.7
cg15806306	11	KCNQ1DN	-82.7606	12.1294	-106.5341 , -58.987	8.91e-12	---+--------+-+-------+----+	29
cg14311362	2	GLI2	-42.7697	6.26925	-55.0575 , -30.482	8.97e-12	--+-----------------+++-++--	35.6
cg04206967	8	TRHR	60.2088	8.82792	42.906 , 77.5115	9.09e-12	++++++++++++-+++++++++-+-+-+	14.7
cg00443981	17	C17orf64	55.8655	8.19174	39.8097 , 71.9213	9.12e-12	+++++-+++++++++?++-+-++++-++	52.3
cg01741041	7	ACTB	110.587	16.2449	78.7472 , 142.4274	9.93e-12	-+++++++++++--++++++-+++++++	32.4
cg21707172	6	TIAM2	53.5425	7.86612	38.1249 , 68.9601	9.99e-12	+-++++++++++-++-+++++-++-+++	6.3
cg16875057	2	STK39	-67.5687	9.93373	-87.0388 , -48.0985	1.03e-11	----?+------+-----+---------	31.7
cg10735015	6	PHACTR2	-41.5025	6.10495	-53.4682 , -29.5367	1.06e-11	------------+-+--++---------	47.1
cg07986199	12	CACNA1C	-67.4191	9.92178	-86.8658 , -47.9724	1.08e-11	-----------++----+----------	55.3
cg05191655	4	TBC1D1	-84.5146	12.4526	-108.9216 , -60.1075	1.15e-11	----?------+--+?------+-----	30.5
cg06478823	16	ACSM3	-45.479	6.70378	-58.6184 , -32.3396	1.17e-11	----?---++-+---?----+-------	12.5
cg16014606	11	MRVI1	75.9052	11.2181	53.9178 , 97.8926	1.32e-11	+++-+-+++++++++-+++++-+++--+	53.1
cg05673882	5	POLK	-45.3191	6.70371	-58.4584 , -32.1798	1.38e-11	-----+------+-+---+---------	51.6
cg01906801	17	MED24	73.906	10.9642	52.4163 , 95.3957	1.58e-11	+++++-++++++-+++++-+-+-+++++	21.7
cg20102045	13	MYO16	51.0796	7.58608	36.2109 , 65.9483	1.66e-11	++++++++++++-+-+++++++++++++	33.6
cg16165575	1	RPE65	-51.1639	7.60376	-66.0673 , -36.2605	1.71e-11	--+------------?----+-+-----	0
cg14731462	10	PTPRE	-64.5694	9.60429	-83.3938 , -45.745	1.78e-11	-----------+---?-++--++-----	13.6
cg24162603	3	EEFSEC	-99.0058	14.7353	-127.887 , -70.1245	1.83e-11	+---+------+--------+-------	57.1
cg26995690	13	MIR548F5	-48.7114	7.25281	-62.9269 , -34.4959	1.87e-11	---+-------+-+------+++-+-+-	16.8
cg03445287	8	XPO7	-79.5044	11.8402	-102.7112 , -56.2975	1.88e-11	----+-------------+----+----	28.5
cg07638500	3	MYLK	78.244	11.6582	55.3939 , 101.0942	1.93e-11	+++++-++++++++++++++++-+++++	0
cg10181414	19	GNG7	54.1712	8.0741	38.346 , 69.9964	1.96e-11	+++++++++++++++?++++++++-+-+	10.6
cg02449762	10	ASB13	57.8862	8.63183	40.9678 , 74.8045	2e-11	++++--+-+-++-+-+++-+-+--++-+	43.5
cg25199005	1	SMYD3	-74.8468	11.1645	-96.7292 , -52.9644	2.03e-11	-----------+-++-------+-----	0
cg24013213	13	GUCY1B2	-42.7487	6.38338	-55.2601 , -30.2372	2.13e-11	-----+-------+++--+--------+	13.1
cg24304210	11	PAK1	-59.5319	8.89346	-76.9631 , -42.1008	2.17e-11	-----+--------+------+++----	62.7
cg11077681	11	MRVI1	87.7728	13.1177	62.062 , 113.4836	2.21e-11	+++-+++++++-+++++++++-++++++	6.4
cg14242936	12	GRASP	53.5165	7.99906	37.8383 , 69.1947	2.23e-11	+++-++-+-++++++-++++-+-+-+++	0
cg15013617	20	TMEM239	-49.7258	7.43605	-64.3005 , -35.1511	2.28e-11	----------++--+--++---------	26.2
cg26889659	6	EXOC2	26.6671	3.98946	18.8478 , 34.4865	2.32e-11	+++++++++++++++-++-++++++--+	32.1
cg16000331	22	SREBF2	-103.176	15.445	-133.4481 , -72.9038	2.39e-11	---+?---------+------++-----	45.3
cg24821554	13	GUCY1B2	-48.5836	7.27484	-62.8423 , -34.3249	2.42e-11	----?+--------+?--+--------+	43.6
cg07443710	10	TSPAN15	-68.9494	10.3303	-89.1968 , -48.7019	2.48e-11	----?-------+-+--+----------	40.7
cg21121843	4	HTT	-51.0901	7.65939	-66.1025 , -36.0777	2.55e-11	-----------++--?-----++-+---	49.2
cg05387269	1	AURKAIP1	65.1557	9.77217	46.0023 , 84.3092	2.6e-11	--+---++++++-+-?+++++-++++++	61.3
cg26884581	11	PYGM	88.347	13.2613	62.3548 , 114.3392	2.7e-11	++++++++++++-+++++++-+++++-+	25.5
cg10421188	7	CREB5	-74.8276	11.2497	-96.877 , -52.7782	2.9e-11	------+---------------+-----	30.2
cg06612130	4	LOC728175	-69.7987	10.503	-90.3846 , -49.2127	3.02e-11	---+----------+------++-++--	25.8
cg20658466	7	IGFBP3	-71.5516	10.7674	-92.6556 , -50.4476	3.03e-11	-----+-----+--+?----+-------	0
cg24495681	8	COL14A1	-100.877	15.1914	-130.6527 , -71.1024	3.13e-11	-++-----+--+---?------------	11.3
cg15959363	4	C4orf32	-53.8772	8.11568	-69.7839 , -37.9705	3.17e-11	-------?+-----------+-+-----	23.9
cg00496272	16	CENPT	138.303	20.8723	97.3937 , 179.2129	3.45e-11	++++++++++++++-++++++-++-+++	15.4
cg00921266	7	HOXA3	69.4912	10.488	48.9347 , 90.0477	3.45e-11	++++++++-+++++--++-++++++++-	23.8
cg00233028	11	CD82	69.6964	10.526	49.0654 , 90.3275	3.56e-11	++-+++++++++++++-++++-++++++	41.3
cg04411893	3	SENP2	-109.383	16.5205	-141.7631 , -77.0028	3.57e-11	-----+-----+--+---+---+-----	43.4
cg02504211	3	XXYLT1	92.6062	14.0013	65.1637 , 120.0488	3.74e-11	+++-+++++++++++-++++++++++-+	2.5
cg08323969	17	TUBG1	81.418	12.3166	57.2774 , 105.5586	3.83e-11	+++++++++-+-+++-+++++--++--+	51.2
cg06937357	14	PACS2	140.321	21.2309	98.7087 , 181.934	3.86e-11	+--+++++-++++++++++++-++-+-+	44.1
cg04912316	17	UBALD2	88.5693	13.4251	62.2562 , 114.8824	4.19e-11	+++++++++++-++++++++++++++++	19.1
cg01919885	4	RGS12	63.0231	9.55415	44.297 , 81.7492	4.21e-11	++++++-+-+++-++++++++++++--+	19
cg13282594	1	PMF1-BGLAP	84.7104	12.8441	59.5359 , 109.8849	4.25e-11	+-+++-+++++--++?++++-+-+++-+	48.9
cg13597554	15	FAM227B	-51.2379	7.7748	-66.4765 , -35.9993	4.39e-11	----?---+---++----+---+-+-+-	48.4
cg03679544	6	TIAM2	57.0115	8.6611	40.0358 , 73.9873	4.63e-11	++-++++++++-+++-++-++-+-++++	30.2
cg22851200	7	TRIP6	68.9925	10.4877	48.4366 , 89.5485	4.76e-11	+++?+++++++++++-+++++------+	50
cg03390636	15	ARNT2	-54.7499	8.32569	-71.0683 , -38.4316	4.83e-11	-----+--------+--++--------+	43.9
cg02397552	13	CLN5	62.2952	9.47688	43.7206 , 80.8699	4.92e-11	++++?-++-+++-++++++++-+++++-	45.4
cg08441314	11	SORL1	-78.8332	12.0012	-102.3556 , -55.3108	5.07e-11	----------------------+-----	16.8
cg25799241	8	FAM83H	51.8732	7.90527	36.3788 , 67.3675	5.32e-11	+++++-+++++-++-+++---+++++++	41.4
cg05925497	11	ARHGAP42	-51.102	7.79467	-66.3796 , -35.8245	5.53e-11	--++--------+--?------+-----	46.4
cg15930777	6	EDN1	-78.5577	11.9899	-102.0579 , -55.0575	5.68e-11	----?------+-----+--+-+-----	36.3
cg13719443	6	LOC285847	91.531	13.9715	64.147 , 118.9151	5.7e-11	++-?++++-+++-++?++++++-++--+	48.9
cg27636559	15	EFL1	-99.9416	15.259	-129.8492 , -70.0341	5.77e-11	-+-?-------+--+---+---++---+	53.1
cg15700009	11	LDHA	74.2886	11.3447	52.053 , 96.5242	5.82e-11	++-?+-++-++++++++++++++++-++	15.8
cg22039357	1	C1orf21	-46.9124	7.164	-60.9538 , -32.871	5.82e-11	----?+-----++--?------------	16.7
cg03796381	15	C15orf41	-60.1728	9.19069	-78.1866 , -42.159	5.87e-11	-----+-----+---?----+----+--	31.8
cg23529896	2	ITGA4	-55.5701	8.49512	-72.2206 , -38.9197	6.09e-11	----+------++-++--+-+-+-----	52
cg25939371	15	CELF6	-66.4477	10.1664	-86.3739 , -46.5216	6.32e-11	--+-?---++-+---------++-+--+	49.4
cg11701868	19	UHRF1	64.6469	9.89401	45.2546 , 84.0391	6.41e-11	?++++++++++-++-+++++++?-++?+	21.2
cg00508575	12	ATP2B1	-64.9348	9.94562	-84.4282 , -45.4414	6.62e-11	--++----------------+-+-----	31.9
cg26297819	22	TEF	-97.5229	14.9369	-126.7993 , -68.2466	6.62e-11	-+-----+------------------+-	0
cg16234490	4	FAM47E	-69.1596	10.5964	-89.9285 , -48.3906	6.72e-11	-+----------+-+------+------	5.1
cg15016701	12	PPM1H	-62.1718	9.52588	-80.8425 , -43.501	6.73e-11	-----------------++---+-----	31.3
cg04500896	2	LOXL3	70.433	10.796	49.2729 , 91.5932	6.85e-11	++++-+++++++-+++++++---+++++	14.3
cg11368628	11	SYT8	-75.3298	11.5673	-98.0017 , -52.6578	7.4e-11	-----------+---?------------	36.6
cg19029445	17	ABR	50.2592	7.71777	35.1324 , 65.3861	7.41e-11	+++++++++++-+-+++-++-+++++-+	6.2
cg04436755	15	LOXL1-AS1	72.1018	11.0761	50.3926 , 93.811	7.53e-11	+++++++++++++++++++++-++-+++	0
cg20948740	2	DNMT3A	86.7465	13.3328	60.6143 , 112.8787	7.7e-11	+++++-+++++--+++++-++-++++-+	35.6
cg09379146	3	TIPARP	-52.0692	8.00295	-67.755 , -36.3834	7.71e-11	--++----------+--+--+---+---	42.3
cg03538922	16	KLHDC4	46.7268	7.18342	32.6473 , 60.8063	7.78e-11	+++++++++++++-+-++-+--++++-+	18.3
cg18050903	4	RASGEF1B	-122.865	18.8917	-159.8928 , -85.8374	7.84e-11	--+?--------+----+----------	36.3
cg14016418	2	LOC400958	-77.6068	11.9486	-101.0261 , -54.1875	8.3e-11	---??++----+---------++-+--+	51.9
cg18299068	4	MAEA	75.6072	11.6435	52.786 , 98.4285	8.39e-11	++-++-+++++--+++++-+++++++-+	32.1
cg24159436	3	PLCL2	-57.3019	8.833	-74.6146 , -39.9892	8.74e-11	------------------+---+----+	21.2
cg03486991	2	CYP27C1	-59.4365	9.16466	-77.3993 , -41.4738	8.85e-11	---+?+-----+-+----+---+-----	48.4
cg10469774	11	CD82	90.9446	14.0276	63.4505 , 118.4387	8.98e-11	++-+++++++++++++++-++++-++++	40.4
cg12403889	1	DRAXIN	-92.2768	14.2393	-120.1858 , -64.3679	9.15e-11	------------+-----+---+-----	11.3
cg02577963	19	KDM4B	66.9171	10.3515	46.6281 , 87.2061	1.02e-10	+++-+++++++-++++++-+++-++-++	42.7
cg19358373	12	CHFR	73.6109	11.3888	51.2888 , 95.9329	1.02e-10	++++++++-+++-++-++++--++++++	0
cg25383605	6	TIAM2	82.4609	12.759	57.4532 , 107.4686	1.03e-10	++++++++++++-++-++-++---++++	47.2
cg03918288	8	SPATC1	99.4629	15.3944	69.2899 , 129.6359	1.04e-10	+++++-+++++-+++?++++-+-+-+++	51.7
cg13182599	14	ZFP36L1	-88.1574	13.6435	-114.8987 , -61.4161	1.04e-10	-----------+------+-------+-	20.5
cg25513776	6	MYLK4	-60.1498	9.31323	-78.4037 , -41.8958	1.06e-10	------------+-+?----+-----+-	15
cg08854834	21	MAP3K7CL	-91.6114	14.1933	-119.4303 , -63.7924	1.09e-10	--------+---------+---+-----	0
cg19295068	19	GLTSCR1	46.0757	7.14169	32.078 , 60.0735	1.11e-10	++--++++++++-+-+++++-+-++-++	42.3
cg21221767	14	MAX	-68.6555	10.645	-89.5197 , -47.7913	1.12e-10	----+----------+------++----	47.9
cg08381620	13	LINC00327	-27.6904	4.29383	-36.1063 , -19.2745	1.13e-10	--------------++------+-----	0
cg02461269	6	ARID1B	-84.378	13.0949	-110.044 , -58.7119	1.17e-10	----?-----------------------	18.2
cg16348385	16	BOLA2	103.685	16.0917	72.1448 , 135.2244	1.17e-10	--++++++-++-++++++++-+++++++	51.4
cg00394823	16	ACSM3	-67.2475	10.4398	-87.7094 , -46.7855	1.18e-10	----++-----+------+---+-----	12.8
cg16744911	10	SCD	-71.1563	11.0449	-92.8043 , -49.5084	1.18e-10	-----+-+----+-----+---------	41.3
cg06850687	12	SMARCC2	-72.0525	11.1926	-93.99 , -50.1151	1.21e-10	-----+--------++--+--++-----	32.7
cg23829395	12	SLC38A2	-59.9216	9.30961	-78.1684 , -41.6747	1.22e-10	---+---+----+-+-----+-------	25.2
cg11115622	14	PLEKHG3	-74.4605	11.572	-97.1416 , -51.7795	1.24e-10	---?---+-----++--+----------	13.3
cg02001279	19	ARID3A	-64.341	10.0036	-83.9481 , -44.7338	1.26e-10	----------++--+?-++---------	51
cg04069539	16	ACSF3	61.5949	9.60073	42.7775 , 80.4124	1.4e-10	+++?+++++++--+-+++++--++++-+	43.3
cg07452706	14	NUDT14	96.6836	15.0689	67.1485 , 126.2187	1.4e-10	-+-++-++++++++-+++-++++++-++	43.3
cg00748072	2	SP3	-78.7726	12.2805	-102.8424 , -54.7028	1.41e-10	-----------+--+--+------+---	25
cg01832549	1	CAPZB	-53.9279	8.40798	-70.4075 , -37.4482	1.42e-10	------------+----+----++----	48.5
cg09726279	17	MYBBP1A	109.864	17.142	76.2655 , 143.462	1.46e-10	+-++++++-+++++++++++---++--+	15
cg21586223	13	CYSLTR2	-53.2289	8.30427	-69.5052 , -36.9525	1.46e-10	-+--?------+--+?------------	39.5
cg07824636	1	DUSP10	-64.3376	10.0412	-84.0182 , -44.6569	1.48e-10	---++---+---------+-----+---	43.4
cg10670376	5	ARHGAP26	-142.53	22.2618	-186.1634 , -98.8972	1.53e-10	--+-?---------------+--+-+--	12.4
cg13928490	13	GUCY1B2	-40.2957	6.29353	-52.6311 , -27.9604	1.53e-10	-----+------------+-----+---	12.6
cg13149245	15	PIF1	-54.1324	8.46268	-70.7192 , -37.5455	1.59e-10	----+-----------------++----	30.5
cg07626482	19	SLC1A5	113.134	17.6912	78.459 , 147.8085	1.61e-10	-+++++++-+++++++++++++--+-++	29.7
cg14172849	14	XRCC3	55.1442	8.62428	38.2406 , 72.0478	1.62e-10	++--++++++++++++++-+++-+++++	59.6
cg26432350	3	NBEAL2	86.8056	13.5839	60.1811 , 113.4301	1.66e-10	+++-++++-+++-+++++++++++++-+	41.5
cg13660174	9	SURF4	61.7398	9.66606	42.7944 , 80.6853	1.69e-10	-+++++++-++-+++++++++--+++++	51
cg08832695	17	HOXB-AS3	81.4674	12.7565	56.4646 , 106.4703	1.7e-10	++++++++++++-+++++++-+-+++-+	21.7
cg22647738	17	CCL16	-54.4469	8.52557	-71.157 , -37.7368	1.7e-10	-+-------+----+-------+-----	13.4
cg10950251	1	PIK3C2B	-56.0243	8.77543	-73.2242 , -38.8245	1.72e-10	---+?-------+--+------------	23.7
cg13696490	3	MIR548H2	-52.1995	8.18313	-68.2385 , -36.1606	1.78e-10	------------++-+--+-+-+-----	18.4
cg15014975	1	RUNX3	40.6606	6.37926	28.1573 , 53.164	1.84e-10	+++++++++++--+++++-+++-+++-+	19.8
cg19211915	11	WT1	-79.1705	12.4281	-103.5296 , -54.8114	1.89e-10	---+-+-+----------------++++	12.3
cg24019564	1	RUNX3	76.8396	12.0637	53.1947 , 100.4845	1.9e-10	++-+++++++++-+++++-++++-++++	32.4
cg20876852	7	MEST	-65.7896	10.3381	-86.0523 , -45.5269	1.97e-10	----------+++-++-----+-+---+	44.8
cg24796852	19	GMFG	-77.8503	12.2348	-101.8305 , -53.87	1.98e-10	+------+----+-+?------------	0
cg02149069	12	IFFO1	82.1818	12.9245	56.8498 , 107.5138	2.04e-10	++++++++++++-+++++++-+-+++-+	0
cg11835355	22	APOL3	-85.2441	13.4219	-111.551 , -58.9371	2.14e-10	----?------+--+?----+-+-----	19.1
cg13443592	10	MIR5100	-80.1149	12.6261	-104.8622 , -55.3677	2.22e-10	-------+-++----------+--+--+	56.9
cg26995224	12	KDM2B	52.8578	8.3342	36.5228 , 69.1928	2.26e-10	+++++++++++++++-++++--+++-++	0
cg04031093	1	NTPCR	-53.1302	8.37838	-69.5518 , -36.7085	2.28e-10	-----++---+++++-----------+-	13.5
cg27089226	3	ZDHHC19	-66.2158	10.4471	-86.6922 , -45.7395	2.33e-10	---+--------------+---------	30.6
cg27389255	11	PSMA1	61.864	9.76611	42.7224 , 81.0056	2.38e-10	++-++-++++++++++++-+-++++-++	43.6
cg08426200	15	HYKK	-66.3398	10.4804	-86.8813 , -45.7983	2.45e-10	---+--------+-++------+-----	56.4
cg23434428	10	PRKCQ	-57.4354	9.07362	-75.2197 , -39.6511	2.45e-10	----+-----+++-++-+----+-----	45.6
cg07795325	4	CAMK2D	-67.218	10.6223	-88.0378 , -46.3982	2.48e-10	------------+--?-------+----	49
cg13869942	1	THEM4	-39.3718	6.22141	-51.5658 , -27.1779	2.48e-10	----?----?-+---?--+---+-----	9.1
cg20204986	11	WT1	-49.581	7.8368	-64.9411 , -34.2208	2.51e-10	---+----+---+-+------+-----+	44.8
cg07042014	14	LTB4R	-87.3815	13.8179	-114.4647 , -60.2984	2.55e-10	-----------++-----+---+----+	29.1
cg05433805	3	LRRFIP2	-48.3715	7.64973	-63.3649 , -33.378	2.56e-10	-+-+?---------+?--+---+-++-+	48.9
cg20283107	8	FAM91A1	-57.2071	9.0496	-74.9443 , -39.4699	2.59e-10	------------------+-+-+-----	0
cg07488576	2	SDPR	-125.644	19.879	-164.6069 , -86.6812	2.61e-10	-------++------?-+--------+-	0
cg25662857	17	CD7	81.2189	12.8498	56.0334 , 106.4045	2.61e-10	+++++++++-++-+--++-+--++++++	0
cg00971695	14	PLEKHG3	-67.8796	10.7459	-88.9416 , -46.8176	2.67e-10	--------+------?------------	0
cg20790648	3	SUCNR1	-50.9685	8.06841	-66.7826 , -35.1545	2.67e-10	----+------+++++----------++	56.4
cg08636638	5	APC	-76.3829	12.101	-100.1009 , -52.6649	2.75e-10	----?+--------+-------+-----	52.6
cg25536676	1	DHCR24	-96.6338	15.314	-126.6492 , -66.6183	2.79e-10	---+---+----------+------+--	36.1
cg05460571	8	MFHAS1	72.2768	11.4574	49.8204 , 94.7333	2.82e-10	++++?+++++++++-+++++-+-++-++	21.6
cg21228424	6	PRPH2	42.5494	6.74599	29.3273 , 55.7716	2.84e-10	+++?+++++++--++?+-+++++++??-	38.2
cg25773386	3	GPR62	-114.565	18.1727	-150.1833 , -78.9463	2.9e-10	-----+-----++-----+---+----+	14.7
cg27593537	10	SFXN3	122.486	19.4323	84.3985 , 160.5733	2.92e-10	+++-+++++++++++-++-+--++++-+	2.2
cg05950943	16	NTN3	-112.391	17.8418	-147.3613 , -77.4215	2.99e-10	---+-----------+------+-+---	25.3
cg23317857	6	TFEB	72.428	11.5012	49.8856 , 94.9704	3.03e-10	++-??--++++++++?++-+-+++++-+	4.7
cg04011671	2	HAAO	61.6205	9.78696	42.438 , 80.8029	3.05e-10	+++?+++++++-+++?+++++++++++-	33.9
cg06388350	4	PDLIM5	-53.7596	8.54385	-70.5055 , -37.0136	3.13e-10	----?------++-+?-+--+-------	49.2
cg27066989	13	GUCY1B2	-58.76	9.33851	-77.0635 , -40.4566	3.13e-10	-----+--------++--+---------	0
cg07157107	8	CHRNA6	-63.9924	10.1805	-83.9461 , -44.0386	3.26e-10	-----+------+----+----+-----	49.2
cg00095326	1	RHOU	71.1358	11.3256	48.9375 , 93.334	3.37e-10	++-++-++++++++-?+++++-++--++	34.2
cg09546258	11	GAL	-105.241	16.7679	-138.1061 , -72.3758	3.47e-10	---++---------------+------+	34
cg10397819	14	EIF2B2	99.3515	15.8349	68.3151 , 130.3879	3.51e-10	+++++++++++-++-?++++++++++++	13.7
cg20309640	1	LOC730102	64.241	10.2606	44.1303 , 84.3517	3.83e-10	++--++++-++++++++++++--+++++	23.9
cg26196087	1	NOTCH2	-74.8557	11.9567	-98.2909 , -51.4205	3.84e-10	-+--?+-----+----------+-----	31.4
cg21788755	3	ATRIP	77.8361	12.442	53.4498 , 102.2223	3.95e-10	++-?+++++++++++-++++++-+++-+	30.8
cg19889855	3	PARP15	-55.0906	8.80642	-72.3511 , -37.83	3.96e-10	-----------+--+-------+-+---	27.3
cg01426808	8	LINC00536	-62.587	10.0106	-82.2079 , -42.9662	4.05e-10	---------------+------+-+---	6.3
cg25122233	12	HOXC4	-45.3405	7.25397	-59.5583 , -31.1227	4.09e-10	----------------------+---++	12
cg02499214	12	RHOF	96.5584	15.4517	66.2732 , 126.8437	4.13e-10	+-+-++++++++-++-++++++++++++	30.7
cg11334730	6	LY86	71.4145	11.4314	49.0088 , 93.8201	4.18e-10	+++++++++++-+++?+++++++-++++	27.9
cg15521790	11	MAML2	-61.5587	9.85623	-80.8769 , -42.2405	4.22e-10	--------------+-------+----+	32.4
cg21490635	12	EMP1	-78.7518	12.6101	-103.4675 , -54.036	4.23e-10	------------+-+--+----------	51.9
cg14251267	20	ZBTB46	37.6007	6.02165	25.7983 , 49.4032	4.26e-10	++++++++++++++--++-+++++++++	25.7
cg14019746	9	WDR31	-58.0061	9.29028	-76.2151 , -39.7972	4.27e-10	---??------+---?--+----??-?-	62.4
cg04304130	6	SMIM13	62.611	10.0306	42.9509 , 82.271	4.32e-10	++-+?++++++--+++++++-+++++-+	13.9
cg25936358	13	ATP4B	-67.8352	10.8693	-89.139 , -46.5315	4.35e-10	---------------?-+-----+----	11.4
cg11250194	11	FADS2	-58.5605	9.38477	-76.9547 , -40.1664	4.38e-10	------------+----++---+-----	55.4
cg09790270	1	SLC41A1	-79.2148	12.6977	-104.1023 , -54.3274	4.42e-10	-+---------+--+---+---+-----	45
cg11125758	14	SEL1L	46.6226	7.47729	31.9671 , 61.278	4.51e-10	+++++++++++++++-++++-+-+++++	10.2
cg14541011	9	RALGDS	68.9742	11.0661	47.2848 , 90.6637	4.58e-10	+-++-+++++++-+++++++--++++-+	39.3
cg10902738	8	ST3GAL1	-53.5619	8.60358	-70.425 , -36.6989	4.8e-10	-----------+--++----+-+-----	0
cg16014412	1	TMEM201	100.562	16.1631	68.8827 , 132.2421	4.92e-10	-+++?+++-++++++++++++-++++++	20.8
cg27051129	13	DLEU7-AS1	63.5841	10.2198	43.5533 , 83.6149	4.92e-10	++++++++++++-+++++-+++-+++-+	0
cg06405563	17	MYO15B	55.8423	8.97688	38.2477 , 73.437	4.95e-10	++-+?++++?++-+-+++-+++-+++++	11.4
cg16396933	10	NT5C2	-49.2529	7.91834	-64.7729 , -33.733	4.97e-10	----++------+---------+-----	3.6
cg23702848	14	XRCC3	49.8659	8.02002	34.1467 , 65.5852	5.05e-10	+---++++++++++++++-+-+-+++-+	36.4
cg10078415	16	ACSM3	-52.3544	8.42247	-68.8624 , -35.8463	5.1e-10	----++--+--++-----+-+-+----+	32.6
cg10905180	11	OR51E2	-33.706	5.42294	-44.3349 , -23.077	5.12e-10	----?-----+-+--?-+--+-------	17.1
cg23865980	10	ZMIZ1	-70.3876	11.337	-92.6082 , -48.1671	5.34e-10	--+----+----++-+------------	0
cg04396112	7	MAD1L1	36.2473	5.83867	24.8035 , 47.6911	5.36e-10	+++++-+++++-+-+?++-++++++-++	0
cg11474701	11	SC5D	-49.054	7.90146	-64.5408 , -33.5671	5.36e-10	----?-+----++-+---+--------+	39.6
cg12192749	7	AGR3	-63.4184	10.2211	-83.4517 , -43.3851	5.48e-10	---+----------+?-++--------+	55.4
cg19744173	2	FBLN7	-80.9516	13.0485	-106.5267 , -55.3764	5.51e-10	-----+-----+--+--+------+--+	50.2
cg21912938	7	JAZF1-AS1	-99.8182	16.0903	-131.3551 , -68.2813	5.52e-10	--------+--++---------------	0
cg24352369	2	CBWD2	-52.4962	8.46406	-69.0857 , -35.9066	5.57e-10	--+-----++-----?--+---------	22.2
cg14717666	4	SYNPO2	-54.6333	8.81045	-71.9018 , -37.3649	5.61e-10	----?-----++--+-------+----+	33.6
cg16855355	4	LOC728175	-66.9945	10.8046	-88.1715 , -45.8175	5.63e-10	---+-------+---------++-+++-	51.9
cg12949547	12	ATP23	-80.8768	13.0471	-106.449 , -55.3046	5.69e-10	-----+--------+-----+-+----+	2.2
cg07408552	17	ATP6V0A1	-85.6248	13.817	-112.7061 , -58.5434	5.75e-10	------------+-+-------+----+	61.5
cg12562461	17	PLEKHM1P1	87.1391	14.0692	59.5636 , 114.7147	5.88e-10	++-+-++-+?++++++++++-+-+++-+	47.2
cg09825327	1	TRAF5	87.5191	14.1309	59.8226 , 115.2156	5.89e-10	++-+--+++++++++-++-+---+++-+	13.5
cg25015038	14	FOXN3	-66.7769	10.7867	-87.9188 , -45.6351	5.99e-10	---?-+-----+--+?-+-----+----	66
cg15995125	1	RCC2	77.8381	12.5788	53.1836 , 102.4925	6.09e-10	+++-+++++++++++-++++++-++++-	0
cg24152264	1	MAP10	-84.0336	13.5803	-110.651 , -57.4162	6.1e-10	---+--------+-------+-------	52.4
cg05478824	17	ASPSCR1	99.7189	16.1188	68.1261 , 131.3117	6.15e-10	+-+++++++++-+++?++++-+++++++	16
cg22778120	22	PRR5	46.832	7.57121	31.9924 , 61.6716	6.19e-10	+++++-++++++++++++++++++++++	42.3
cg21350153	2	KCNIP3	78.2419	12.6516	53.4448 , 103.039	6.24e-10	++++?+-+++++-+-+++-+-+-+++-+	50.9
cg08274637	13	DLEU7-AS1	50.1577	8.11206	34.2581 , 66.0573	6.29e-10	++++++++++++-+++++-+++-+++++	0
cg01368219	3	CACNA2D3	47.1166	7.62189	32.1777 , 62.0555	6.34e-10	+++++-++++++-++-++-+-+++++++	2.1
cg20494738	12	NCOR2	75.4767	12.2115	51.5421 , 99.4113	6.38e-10	+++-+-++++++-+++++-+++++-+-+	62.6
cg08643339	4	GALNTL6	-57.2731	9.27146	-75.4452 , -39.1011	6.52e-10	+--++-------+-+-------+-----	47
cg10322443	14	MIR4708	87.6124	14.1838	59.8121 , 115.4127	6.54e-10	+++++-++++++++-++++++-+-++++	38.4
cg24279744	3	ATP2B2	70.8216	11.4666	48.3471 , 93.2961	6.56e-10	+++++++++-++-++?+++-+++-++++	51.5
cg12876356	1	GFI1	22.0782	3.57522	15.0708 , 29.0857	6.6e-10	+++-+-+++++++++?++++-+++++-+	34.2
cg02264407	13	LMO7	60.5277	9.80637	41.3072 , 79.7482	6.73e-10	+++?+++++++++++-++++++-+++++	24.6
cg13598409	20	KCNK15	-95.6187	15.4971	-125.993 , -65.2444	6.82e-10	--------+--+--+------+-----+	0
cg09026568	22	TRABD	59.6156	9.66356	40.675 , 78.5562	6.87e-10	++--++++-+++-+++++++-++++--+	0
cg16398956	14	EML1	-91.9207	14.9146	-121.1533 , -62.6881	7.13e-10	+--+---+---------+----------	2.6
cg06560379	6	NFKBIE	119.317	19.3614	81.3687 , 157.2654	7.16e-10	+++--+++++++-++++++++++-++++	32
cg25376651	13	EEF1DP3	-57.3379	9.30948	-75.5844 , -39.0913	7.32e-10	-+--?-----+-----------------	0.8
cg02583484	12	HNRNPA1	75.362	12.2441	51.3636 , 99.3605	7.51e-10	+++++++++-+++++++++++------+	49.7
cg18835596	6	MYB	-73.4534	11.9407	-96.8572 , -50.0496	7.68e-10	-----+--+--+--+?-+----+-----	0
cg02892925	8	TOX	-40.7959	6.63349	-53.7975 , -27.7943	7.75e-10	--++-----+-+---+-----+------	0
cg11036672	4	TRMT44	79.4563	12.9203	54.1324 , 104.7802	7.76e-10	++++++-+++++-++-++-+-+-+++++	0
cg22877452	1	NFIA	30.7131	4.99413	20.9246 , 40.5016	7.76e-10	+++++++++++++++++++-++-++--+	25.1
cg10173172	8	TMEM65	80.2463	13.0519	54.6644 , 105.8281	7.84e-10	++++?+++-++---+++++++-+++++-	1.6
cg03565674	11	MOB2	90.2123	14.6738	61.4517 , 118.9729	7.85e-10	++-++-+++++++--+++++---++--+	23.8
cg13641903	11	WT1	-57.1075	9.29207	-75.32 , -38.895	7.96e-10	--+--+--+---+----------+--+-	31.5
cg26681628	16	FTO	-56.4827	9.19233	-74.4997 , -38.4658	8.02e-10	-+-------------------+--+---	0
cg20730966	3	GLB1	-70.4744	11.47	-92.9557 , -47.9931	8.04e-10	---??-----+-----------+-----	0
cg27132471	15	SLCO3A1	-109.112	17.7624	-143.9258 , -74.2973	8.11e-10	--+---------+--?-----++-----	1.6
cg13203135	21	C21orf33	45.171	7.35466	30.7558 , 59.5861	8.16e-10	++++--++++++-+-++++++++++-++	19.9
cg03726147	1	DMAP1	80.3433	13.0905	54.6859 , 106.0007	8.38e-10	-++++++-++++-+++++-+++-+++-+	48
cg06178669	11	HRASLS2	-45.2191	7.36809	-59.6605 , -30.7776	8.4e-10	-+--?---+---+-+-------+---?-	0
cg06874403	10	SKIDA1	66.4698	10.8347	45.2338 , 87.7058	8.52e-10	+++++++++++-++-++++++-+-++++	0
cg27139419	15	IGF1R	-49.4508	8.06385	-65.256 , -33.6457	8.66e-10	------------+---------+----+	30.7
cg19374752	12	GRASP	60.7231	9.90528	41.3087 , 80.1374	8.77e-10	+++-++++-++-+++-++++-+-+-+-+	7.7
cg02331649	3	TMEM110-MUSTN1	-58.3467	9.5181	-77.0022 , -39.6913	8.78e-10	----?------+--++-+--+-+-----	43.9
cg25311963	1	MIB2	61.584	10.0498	41.8865 , 81.2816	8.9e-10	++++?+++-++--+++++++++-+--++	32.1
cg05082527	11	MIR130A	66.1755	10.809	44.9898 , 87.3611	9.23e-10	++++++++-++++++?++-+-+++++++	62.5
cg14839898	11	TIMM8B	-153.969	25.1496	-203.2622 , -104.6757	9.23e-10	-+-------------+--+----+----	29.5
cg17061862	11	WEE1	-41.0304	6.70476	-54.1718 , -27.8891	9.38e-10	---+-------++-+--+---++-----	35.8
cg04052013	11	TNNT3	94.2089	15.4066	64.012 , 124.4058	9.67e-10	+++++++++-++++++++++++++---+	13
cg03636488	12	EP400	50.3748	8.24226	34.22 , 66.5296	9.85e-10	++++++++++++-+--+++++-++++++	28.3
cg16476991	13	RASA3	84.6804	13.8633	57.5084 , 111.8525	1.01e-09	++--+++++++--++-++++++++-+++	32.3
cg04222728	7	KIAA1549	-108.267	17.7323	-143.0224 , -73.5119	1.02e-09	----?----------?--+-+-------	28
cg11046602	17	SPOP	-76.1162	12.48	-100.577 , -51.6554	1.07e-09	-----+---------?--+---+----+	41.3
cg22583147	3	TOPAZ1	-87.7353	14.3924	-115.9444 , -59.5263	1.09e-09	+-----------+-+-----+------+	49
cg21155834	2	MBD5	-105.767	17.3572	-139.7868 , -71.7466	1.1e-09	---??-------------+---+-+---	37.3
cg02255004	4	PCAT4	-68.4806	11.2412	-90.5133 , -46.4478	1.12e-09	----?--+---+------+---+-----	15.4
cg27115863	22	CARD10	-82.79	13.5921	-109.4304 , -56.1496	1.12e-09	-+---+------+-+?-----+------	23.3
cg04004830	2	SDPR	-82.2504	13.5075	-108.7252 , -55.7757	1.14e-09	+-+-?--++----+----------+---	19.3
cg06890610	16	SNX29	64.4744	10.5896	43.7187 , 85.2301	1.14e-09	++++++++++++++++++++++-++--+	28.1
cg27134910	2	SLC8A1	-43.4301	7.13306	-57.4109 , -29.4493	1.14e-09	---?--++-?-+--+-----+-------	0
cg02017450	10	SFTA1P	-31.8133	5.22922	-42.0625 , -21.564	1.17e-09	-----+-----+--+?-++--------+	64.6
cg24843003	19	DAZAP1	68.7595	11.3016	46.6083 , 90.9107	1.17e-09	+-+++++++++++++-++++-+-+++-+	35.7
cg05910124	8	TRAPPC9	63.4712	10.4347	43.0193 , 83.9232	1.18e-09	+++++-+++++--+--++++++++++++	0
cg26413708	6	TRERF1	-68.5781	11.2765	-90.68 , -46.4761	1.19e-09	---+----------+--+----------	17.7
cg17758673	4	RGS12	48.449	7.96944	32.8289 , 64.0691	1.21e-09	+++++--+-+++-+++++-+++--+--+	36.5
cg25311470	7	NRCAM	72.9137	11.9941	49.4052 , 96.4221	1.21e-09	+++++++++-+--++++++++--+++++	31.8
cg03861784	12	LLPH	-64.3488	10.5882	-85.1017 , -43.596	1.22e-09	----?-+----+--+------------+	52.5
cg03969902	1	LINC00982	38.9177	6.40644	26.3611 , 51.4744	1.24e-09	+++?+++-+++---++++++++-++--+	16.9
cg09935388	1	GFI1	25.1416	4.13809	17.031 , 33.2523	1.24e-09	+++-+-+++++++++?++++-++++++-	49.3
cg05057834	3	ITGA9	96.4398	15.8795	65.316 , 127.5636	1.25e-09	+++++-++++++-++-++++---++--+	34.2
cg10755899	4	FGFR3	65.3066	10.7559	44.225 , 86.3883	1.27e-09	+++-++++++++++++++-+-+++++-+	0
cg19523667	7	ZMIZ2	72.438	11.9447	49.0264 , 95.8496	1.32e-09	+-+++-++-++-++++++++-+-++--+	32.4
cg09098522	10	ZNF438	66.49	10.9695	44.9899 , 87.9901	1.35e-09	-+++-++++++++++++++++++-++++	39.6
cg14035521	9	POLR1E	106.623	17.5992	72.1284 , 141.1171	1.38e-09	+--+++-++++--+++++++++-+-+++	48.1
cg00602416	10	SKIDA1	67.905	11.2133	45.9269 , 89.8831	1.4e-09	+++++++++++++++?++++++++++++	14
cg08947774	4	PALLD	-54.6875	9.03045	-72.3872 , -36.9878	1.4e-09	-----------+-+-?-++---------	10.3
cg14914442	10	SH2D4B	-64.2476	10.61	-85.0432 , -43.4519	1.4e-09	----+-----++---------+--+---	52.5
cg01351032	16	CIITA	-67.7838	11.2001	-89.7359 , -45.8317	1.43e-09	---+----------+---+---+-----	0
cg14090409	17	CCDC57	110.061	18.1967	74.3949 , 145.726	1.46e-09	+++?+++++++-++++++++--++++-+	0
cg20186396	17	CD7	87.0489	14.3963	58.8321 , 115.2657	1.48e-09	++-++-++++++++--++-+---+++++	31.6
cg14785527	10	STAMBPL1	-60.4054	9.99383	-79.9933 , -40.8175	1.5e-09	+----+--------+---+---------	17.2
cg03180134	4	MAML3	59.1469	9.78881	39.9608 , 78.3329	1.52e-09	+++++-+++++++++-+++++-++++-+	0
cg21726551	12	ADGRD1	71.2413	11.7932	48.1266 , 94.3559	1.53e-09	+++++-++++++-+-+++++++++++++	13.9
cg13601957	8	TOX	-66.5453	11.0167	-88.1381 , -44.9525	1.54e-09	----+--+---+--+---+-+-+-----	39.3
cg23404711	14	FOS	60.6292	10.0393	40.9521 , 80.3062	1.55e-09	+++-++++++++-+++++++++-+++++	11.1
cg25345722	3	SAMD7	-42.9596	7.11362	-56.9023 , -29.0169	1.55e-09	----?------++-+-------+-----	58.1
cg17783244	22	PATZ1	50.1382	8.30364	33.863 , 66.4133	1.56e-09	+-++++++++++-++?++-+-+++++++	4.3
cg00448875	3	RAB6B	-54.7949	9.07578	-72.5834 , -37.0064	1.57e-09	-----------++--?-+----------	39.4
cg19876649	18	MYOM1	-61.2262	10.1421	-81.1048 , -41.3476	1.57e-09	--+--------+--+--------+----	35.9
cg27396284	7	HDAC9	-60.9469	10.0961	-80.7354 , -41.1585	1.57e-09	----?-------------+---------	35.6
cg05512157	12	DIP2B	56.4314	9.35067	38.104 , 74.7587	1.59e-09	?-+++++-++++-+++++++-+?---?+	19.1
cg18944752	4	RGS12	-46.5742	7.72003	-61.7055 , -31.443	1.61e-09	-----------+--------+-++----	18.6
cg10671066	1	SLAMF6	-82.8586	13.7512	-109.8109 , -55.9062	1.69e-09	----++----------+-----------	17.6
cg07565956	17	ZBTB4	85.4477	14.186	57.6432 , 113.2523	1.71e-09	++++++++++++-++?++++-++--+++	23.7
cg13430552	2	DNMT3A	63.3443	10.5204	42.7243 , 83.9642	1.73e-09	+++++-+++++-++++++++-+-++-++	31.5
cg25936138	5	TRIM36	61.0438	10.1406	41.1683 , 80.9194	1.75e-09	+++-++++++++++--++-++-+++-+-	46.6
cg15331996	10	ANAPC16	92.0433	15.2935	62.068 , 122.0187	1.76e-09	++++++-+++++-+++++++++++++++	28.2
cg02332696	10	CASC10	-116.564	19.3805	-154.5493 , -78.5778	1.81e-09	--+---------+--?------+-----	0
cg01723892	1	MAP10	-48.3678	8.0495	-64.1448 , -32.5907	1.87e-09	---------+------------+---++	24.3
cg17819250	8	KCNU1	-55.9302	9.30817	-74.1742 , -37.6862	1.87e-09	--+?--+-------+------++-----	31.7
cg14397120	9	QSOX2	90.2182	15.0165	60.7859 , 119.6506	1.88e-09	+++??++++++-++-++++++--+-+-+	0.8
cg21249754	12	PTPN6	76.341	12.7156	51.4184 , 101.2635	1.93e-09	++--+++++++++++?+++-++++++-+	20.9
cg07552087	16	MLST8	-64.5815	10.7598	-85.6706 , -43.4924	1.95e-09	--+--------++--?-----+------	31.6
cg03278811	6	FOXO3	96.1338	16.0185	64.7377 , 127.53	1.96e-09	+++++++++++-++++++++-+-++--+	0
cg02348437	2	MPP4	-57.5699	9.59553	-76.3771 , -38.7626	1.98e-09	-+--+------+---+------+-+---	23.2
cg07951201	13	METTL21C	-44.9154	7.48916	-59.5941 , -30.2366	2.01e-09	--------------+?-----------+	45.5
cg23630423	17	RTN4RL1	58.8849	9.81971	39.6383 , 78.1316	2.02e-09	+++++-++-+---+++++-+++++++-+	21.4
cg07285708	3	TATDN2	121.445	20.2638	81.7279 , 161.1619	2.06e-09	+++-+++++++-++++++++-++---++	40.3
cg04310331	11	MRPL23-AS1	108.122	18.0462	72.7515 , 143.4925	2.08e-09	+-+++++++-+++++-++++--+++--+	21.9
cg12158889	2	SUCLG1	-61.2607	10.2417	-81.3345 , -41.1869	2.21e-09	--+--+-----+----------+-----	40.7
cg01439112	3	CTDSPL	-134.731	22.5286	-178.8868 , -90.5745	2.23e-09	---+----------+--+--------+-	10.2
cg25921609	17	MYH10	46.2081	7.72829	31.0606 , 61.3555	2.24e-09	+++-+++++++--+-+++++++++++++	41.5
cg12103569	12	SFSWAP	55.3268	9.25403	37.1889 , 73.4647	2.25e-09	++++-+++++++-+--+++++-++++++	7.6
cg13725803	13	GUCY1B2	-45.6076	7.62932	-60.5611 , -30.6541	2.26e-09	---?-+--------+?--+-----+--+	3.7
cg06996175	19	GNG7	65.6806	10.9899	44.1403 , 87.2208	2.28e-09	++-+++-+++++++++++++++++-+++	0.4
cg01115380	6	FOXC1	-42.0076	7.03048	-55.7874 , -28.2279	2.3e-09	----?+-----+--+?----------+-	5.7
cg26357744	3	RASSF1	151.019	25.2768	101.4761 , 200.5613	2.31e-09	++++-+++++++++++++-++--+-++-	10.3
cg05155595	2	ANXA4	-67.3421	11.2741	-89.4393 , -45.2449	2.33e-09	---------------?--+---++----	0
cg06967124	5	FLT4	54.4613	9.11818	36.5897 , 72.333	2.33e-09	+-++--++-++--+++++++--++++++	13.4
cg16069079	15	DLL4	69.5656	11.6492	46.7331 , 92.398	2.35e-09	-++++++++++++++?+++++++++-++	38.3
cg08958168	16	SLC12A4	79.8904	13.3844	53.657 , 106.1239	2.39e-09	++++-++++++-++++++++-+++++-+	3.7
cg08400424	5	ARHGAP26	-68.2669	11.439	-90.6873 , -45.8466	2.4e-09	-+---++-------+-------+-+--+	22.1
cg22996783	11	MYEOV	-79.6124	13.3539	-105.7861 , -53.4387	2.5e-09	--+---+-----+-+-------------	10
cg27661394	4	STX18-AS1	-78.8391	13.2241	-104.7583 , -52.9199	2.5e-09	-----+------+-+------++----+	25.2
cg14765414	13	MCF2L	82.3003	13.8076	55.2374 , 109.3632	2.52e-09	+-++-+++++++++-++++++-+++--+	28.5
cg07137429	10	PYROXD2	-82.3459	13.8199	-109.4329 , -55.259	2.55e-09	----?+----------------+-----	0
cg12532095	6	LINC00473	66.0424	11.0877	44.3104 , 87.7743	2.58e-09	++++--++++++-++-++++++-+++++	0
cg06452184	4	ADGRL3	55.2535	9.27803	37.0686 , 73.4385	2.6e-09	+++?+++?++++++-?++++-++-+-++	44.5
cg11323439	11	CREB3L1	-75.8265	12.7327	-100.7825 , -50.8705	2.6e-09	-------+---+--+------+---+-+	37.6
cg03487027	10	ZNF503	44.6912	7.50541	29.9806 , 59.4018	2.61e-09	+++++-++-+++-+++++++++-+++-+	5.5
cg20671781	10	RET	69.1057	11.6115	46.3471 , 91.8643	2.66e-09	+++-+-+++++--+++++-+++-+++++	52
cg04276057	2	C2orf82	88.4952	14.8742	59.3416 , 117.6487	2.69e-09	++++++++++++++-+++-+-+--++-+	0
cg09364590	6	TIAM2	78.1134	13.1306	52.3774 , 103.8495	2.7e-09	++++++++++++-++++++++-+-++++	44
cg13594903	9	STOML2	117.226	19.7129	78.589 , 155.8635	2.74e-09	++-?-+++-+++++-++++++--+--++	42.6
cg00739778	17	RAP1GAP2	-54.2336	9.12101	-72.1108 , -36.3565	2.75e-09	---?-+---------?-+---+------	16.6
cg01514538	1	LINC00982	48.7096	8.19292	32.6515 , 64.7678	2.76e-09	+++++++-+++-+-+?++++++-++-++	16.8
cg25776343	10	PALD1	-62.2102	10.4643	-82.7203 , -41.7001	2.77e-09	----?+---?-+---+--+---+-----	27
cg03717364	2	HAAO	43.2003	7.26905	28.953 , 57.4477	2.8e-09	+++++++++++-++++++++-++++++-	0
cg14827929	4	TLR3	53.6974	9.0404	35.9782 , 71.4166	2.86e-09	++-+-++-++++-+++++++++++---+	0
cg17237086	22	MKL1	74.0693	12.4791	49.6102 , 98.5283	2.93e-09	++++++++++++-+-?++++++++++-+	8.5
cg06231285	7	LRCH4	58.0352	9.78163	38.8632 , 77.2072	2.97e-09	+++?+++++++-++-+++-+-+++++-+	27.3
cg15895197	2	EMILIN1	68.9678	11.6324	46.1683 , 91.7672	3.05e-09	+++++-+++++++++-++++-++++-++	8.7
cg13599248	6	SLC17A5	-41.5463	7.00883	-55.2836 , -27.8089	3.07e-09	-----+---+----------+-------	5
cg13425938	9	EGFL7	75.4388	12.7295	50.489 , 100.3885	3.1e-09	+-++++++++++++-?++++-+-+++++	11.6
cg00930606	22	PATZ1	81.1827	13.7009	54.329 , 108.0364	3.12e-09	++-+++++++++++-+++++--++---+	9.5
cg25098174	17	CYB561	-98.3915	16.609	-130.9452 , -65.8378	3.14e-09	-+--------+---+------+--+--+	26.6
cg03841312	22	MIRLET7BHG	60.3592	10.1917	40.3835 , 80.3349	3.17e-09	+++++-+++++--+++++-+++++++-+	27.3
cg16706260	12	REP15	-58.5078	9.88035	-77.8733 , -39.1423	3.19e-09	------------+--?-+--+-------	51.5
cg08305942	16	MAF	-58.9573	9.95789	-78.4747 , -39.4398	3.21e-09	-----+------+----+---+------	11.9
cg03337886	13	IRS2	73.6595	12.4423	49.2726 , 98.0464	3.22e-09	+++++++++++++++++++++--+++-+	45.7
cg07996594	1	RUNX3	66.08	11.1653	44.1961 , 87.9639	3.25e-09	++-+++++++++++++++++++-+++-+	9.2
cg03661409	2	GLS	-91.3658	15.4398	-121.6278 , -61.1037	3.27e-09	--+--------++-+?-++-+-+-----	14.1
cg10583311	12	FBRSL1	64.182	10.8504	42.9152 , 85.4487	3.32e-09	+++++-+++++++++-++-+-+-++--+	47.9
cg00091302	1	RGS8	-52.383	8.85737	-69.7435 , -35.0226	3.34e-09	--+--+--+--+---------+--++--	44.8
cg01820192	21	LINC00319	86.8772	14.6921	58.0806 , 115.6738	3.36e-09	+-++++-++-+-++-++++++-++++++	3.1
cg13631444	8	TRHR	42.1236	7.12456	28.1595 , 56.0878	3.37e-09	+++++++-++++-+++++++++++-+++	12.7
cg02473287	2	YWHAQ	-85.5421	14.4691	-113.9016 , -57.1827	3.38e-09	--++-+--+-----+-----+++-----	42.2
cg21505925	21	DYRK1A	-49.0787	8.30234	-65.3513 , -32.8062	3.39e-09	---+--------+-------------+-	0
cg11854981	6	TRERF1	-47.166	7.97919	-62.8053 , -31.5268	3.4e-09	-----+----++--+?-+----+----+	48.7
cg05900530	3	WDR49	-43.597	7.37603	-58.054 , -29.14	3.41e-09	-------?+-----+?-++-+-++-+--	50.2
cg19827875	1	NAV1	32.5643	5.5143	21.7563 , 43.3723	3.52e-09	++++++++-++-+++++++++--+--++	0
cg07589393	7	SKAP2	-70.9773	12.0221	-94.5407 , -47.4139	3.55e-09	---------------?-++------+--	26
cg12065777	17	TRPV2	-61.0669	10.3431	-81.3395 , -40.7944	3.55e-09	---?----------+?-+---+---+--	12.2
cg13251842	22	MIRLET7BHG	45.3019	7.67305	30.2627 , 60.341	3.55e-09	+++++-+++++--++?++-+++++++-+	38.8
cg12374579	17	ASPSCR1	53.3703	9.04297	35.6461 , 71.0945	3.59e-09	+++++++++++-++-?++++-+++++++	41.1
cg23895055	2	NIFK	65.3124	11.0676	43.6199 , 87.005	3.61e-09	++-+++++-+++-+--++-+++-+++-+	38.1
cg05446414	11	IL18BP	-66.0589	11.1957	-88.0025 , -44.1154	3.63e-09	---+-----------+-+---+-----+	51.5
cg18503793	22	TEF	-162.081	27.4696	-215.921 , -108.2401	3.63e-09	----+--+---+------+---+----+	0
cg08101036	7	HOXA3	56.7032	9.61124	37.8652 , 75.5413	3.64e-09	++++++++-+++++-+++-+++++++++	16.8
cg04983687	16	ZFPM1	-48.808	8.27894	-65.0347 , -32.5813	3.74e-09	---+--------+-+--+---+-+----	30.1
cg12801067	12	LOC728084	-69.7206	11.8327	-92.9128 , -46.5284	3.81e-09	--+-?------++-------+-------	36.4
cg00227665	16	KLHDC4	47.5984	8.08063	31.7604 , 63.4365	3.85e-09	++++-+++++++--++++-+-+++++-+	23.7
cg20359445	12	IKZF4	73.0825	12.4092	48.7605 , 97.4045	3.88e-09	++-++++++++++++-+++++--++-++	41.6
cg14161821	9	KDM4C	-44.8507	7.6257	-59.7971 , -29.9043	4.07e-09	------------+-+--++---------	39.3
cg20012601	4	MAML3	67.1802	11.4243	44.7887 , 89.5718	4.09e-09	++++++++-++++++?+++++---+-++	29.4
cg05648303	4	SCOC	-38.7293	6.58712	-51.6401 , -25.8186	4.11e-09	-----------+---?-++-+----+--	47.9
cg21926626	8	TSNARE1	-43.9198	7.47311	-58.5671 , -29.2725	4.18e-09	-----+----+-+-----------+---	20.6
cg03573390	16	PLLP	43.9189	7.47341	29.271 , 58.5667	4.19e-09	++++-+--+++++++?+++++++-++-+	0
cg22962123	7	HOXA3	50.7612	8.63842	33.83 , 67.6926	4.2e-09	+++++++++++++++-++-+++-+++-+	0
cg21690489	11	CREB3L1	-116.508	19.8307	-155.3759 , -77.6395	4.23e-09	-+--+---------+?--+-+-+----+	29.3
cg01264106	22	LGALS1	-67.952	11.5672	-90.6237 , -45.2803	4.24e-09	----++-----++-----+--++-----	41.2
cg24707200	1	NTRK1	-101.574	17.2927	-135.4674 , -67.6802	4.26e-09	---?--------+-+-------------	0
cg19449917	3	LINC00880	-75.7058	12.8915	-100.9731 , -50.4384	4.29e-09	--++---+---+---?-+----+---+-	46.9
cg13683827	12	PCED1B	-68.9226	11.7405	-91.9339 , -45.9113	4.34e-09	---??+-----+---?------+-----	51.5
cg02355304	7	FBXL18	52.4424	8.93525	34.9293 , 69.9555	4.38e-09	+++++++++++-++++++++-++++-+-	29.1
cg12149606	14	TMED10	48.4396	8.25522	32.2594 , 64.6198	4.42e-09	++--+-++++++-++?++++++++-+-+	35.1
cg16323245	3	ZBTB20	-42.8511	7.30818	-57.1751 , -28.527	4.53e-09	----?-----+-+-++-++---+---?-	48.9
cg17730048	17	PPY2P	60.4519	10.3118	40.2407 , 80.6631	4.56e-09	++-+++++-++-++-?++++-+++--++	23.4
cg00558749	1	NADK	70.1256	11.963	46.6781 , 93.5732	4.58e-09	+-++-+++++++++++++++--++++-+	0
cg04221117	10	CELF2	104.652	17.8531	69.6595 , 139.6437	4.58e-09	++++-+++++--+++++-++++-+++--	19.3
cg18146737	1	GFI1	23.2605	3.9681	15.483 , 31.038	4.58e-09	+++-+++++++++++++++++-++++-+	59.3
cg13065228	8	FOXH1	-32.2475	5.50184	-43.0311 , -21.4639	4.6e-09	-----------+---+----+-+-----	37.9
cg08549335	7	ZNRF2	-44.2293	7.54924	-59.0258 , -29.4328	4.66e-09	------------+-------+-?+--?-	0
cg00873678	14	CCDC88C	42.7594	7.29922	28.4529 , 57.0658	4.68e-09	+++++++-+++-+++++++++-++--+-	36.4
cg03335624	5	ENC1	-58.834	10.0427	-78.5177 , -39.1502	4.68e-09	-----+-----+---?--+--+--++-+	38.5
cg24318728	17	KRT36	-51.0375	8.71388	-68.1167 , -33.9583	4.71e-09	----++---------?------------	0
cg09076584	17	SPAG5-AS1	76.1788	13.0246	50.6506 , 101.707	4.95e-09	+-++++++++++++++++++++++++-+	23.4
cg05901196	10	CCDC6	59.427	10.1716	39.4907 , 79.3632	5.14e-09	+++?-+++-++++++++++++-?+-+?+	14.4
cg09113483	1	NFIA	29.5182	5.05243	19.6154 , 39.421	5.15e-09	++++-++++++++++++++-++--+--+	41
cg18598117	19	ARID3A	-46.422	7.94575	-61.9957 , -30.8484	5.15e-09	----------++--+?-++---------	41
cg25488206	22	RBFOX2	-115.846	19.8364	-154.725 , -76.9664	5.22e-09	-----------+---?--+--------+	0
cg22117819	22	LINC00895	-74.4011	12.7407	-99.3728 , -49.4294	5.23e-09	----+-----+-+-----------+---	32
cg01894038	11	NDUFC2-KCTD14	-69.1411	11.8421	-92.3515 , -45.9306	5.26e-09	-----------++-+?------------	2.5
cg22452230	15	DRAIC	-58.3308	9.99133	-77.9138 , -38.7478	5.28e-09	-----+-------+-?------+-+---	18.3
cg13472584	1	PRDM2	-61.1892	10.4825	-81.7349 , -40.6435	5.31e-09	-----+-----+--------+-+----+	40.4
cg09119776	10	SUFU	54.7314	9.37928	36.348 , 73.1148	5.37e-09	+++++-++++++-+++++-+++++-+++	13.9
cg23415434	2	ARHGEF4	46.1897	7.91574	30.6748 , 61.7045	5.37e-09	-+-+++++++++++--++++--+++-++	40.4
cg08474929	11	UPK2	117.047	20.0675	77.7145 , 156.379	5.46e-09	+++++-++++++-+-+++++-+++++++	3.5
cg05208050	2	MOGS	-103.542	17.7585	-138.3485 , -68.735	5.53e-09	--+++------++-++-----+------	23.6
cg23883632	14	MAP3K9	-45.4953	7.80301	-60.7892 , -30.2014	5.53e-09	----?+------+-------+++----+	32.5
cg24173182	17	HIC1	-39.8366	6.83379	-53.2308 , -26.4424	5.56e-09	--+---------+---------+---+-	42.5
cg20784591	7	PILRA	121.962	20.9283	80.9428 , 162.9816	5.62e-09	+++++-+++-++-++?++++++++++-+	0
cg22149555	12	GOLGA3	45.4038	7.79207	30.1314 , 60.6763	5.65e-09	-+++++++++++-+--++++--++++++	9.3
cg04945379	16	CIITA	-82.3225	14.1367	-110.0306 , -54.6145	5.77e-09	----?+-----++--?------------	13.7
cg19863740	22	PARVG	-78.4339	13.4764	-104.8477 , -52.0202	5.88e-09	-+--------------------+-----	0
cg07211044	8	TOX	-38.1791	6.56047	-51.0377 , -25.3206	5.9e-09	---------+--+--+------+-----	0
cg09340403	6	TNFAIP3	-44.8128	7.70273	-59.9102 , -29.7155	5.96e-09	----+---------+-----+++-----	22.8
cg01490733	1	SKI	108.134	18.5873	71.7031 , 144.5654	5.97e-09	+-+++++++++-++-++++++--++--+	22.8
cg01307174	3	ARPP21	-51.4393	8.84488	-68.7753 , -34.1033	6.04e-09	--+-----+--++-----+-+-+-----	30.4
cg10713839	4	ANTXR2	-51.7561	8.89991	-69.2 , -34.3123	6.05e-09	---+-+--------+---+-+-+---+-	53.6
cg18716210	11	MRPL23-AS1	53.2932	9.16403	35.3317 , 71.2547	6.05e-09	+++++++++++--+++++++-+-+++-+	46.8
cg23999170	1	TSPAN2	-50.9133	8.75547	-68.074 , -33.7526	6.06e-09	----------+++-+--+----++----	39.4
cg19869443	1	SAMD13	-56.6696	9.74642	-75.7726 , -37.5667	6.09e-09	------------+-+-------+-----	6.3
cg05593411	5	PDE4D	76.7076	13.1975	50.8405 , 102.5747	6.16e-09	++++?+++++++++-++++++-+---++	37.3
cg11294761	17	CD7	96.0763	16.5295	63.6785 , 128.4741	6.16e-09	++++-++++-++++--++++-+++++++	18.4
cg08217545	19	NFIC	-48.4135	8.3404	-64.7607 , -32.0663	6.45e-09	----------+++-+?------------	32.5
cg26828842	18	SOCS6	-55.3044	9.52955	-73.9823 , -36.6265	6.5e-09	-+-++------+--------++++-+--	44
cg06072822	13	MCF2L	100.592	17.3427	66.5997 , 134.5833	6.62e-09	+++??-+-+++++++-+++++--+++-+	26.1
cg22925751	12	LOC643339	-67.2418	11.5927	-89.9634 , -44.5201	6.62e-09	-----------++----+----------	0
cg27659768	16	ZNF19	-49.1762	8.47952	-65.796 , -32.5563	6.66e-09	---+-------+---------++-+---	31.5
cg07248377	16	MGRN1	64.2809	11.0878	42.5488 , 86.0129	6.73e-09	++-+++++++++-+--++++-+++++-+	6.3
cg02640173	2	GLI2	-44.4126	7.66291	-59.432 , -29.3933	6.8e-09	--++----------------++--++--	23.9
cg08756594	11	LSP1	85.4651	14.7499	56.5552 , 114.3749	6.86e-09	++-+++++-++-+++++++-++++++-+	0
cg00831931	10	TCF7L2	-93.7156	16.1858	-125.4398 , -61.9913	7.04e-09	------+----+-++----++------+	23.3
cg07177115	2	IL36A	-92.3302	15.9561	-123.6042 , -61.0562	7.19e-09	-----+-----+--++--+--+---+--	9.4
cg17292662	8	ATP6V1H	-64.1458	11.0896	-85.8814 , -42.4102	7.28e-09	--+--------+---?-++--+------	40.5
cg00533407	7	ASIC3	-61.3961	10.6192	-82.2098 , -40.5825	7.4e-09	--+---------+--?-----------+	34.4
cg19935065	10	DNTT	-67.9009	11.7444	-90.9199 , -44.8819	7.4e-09	--+------------?--+---------	27.8
cg04933530	14	IRF2BPL	-68.8462	11.9158	-92.2011 , -45.4913	7.57e-09	---+--------+-+--+---+-+----	37
cg03469471	7	NOS3	104.352	18.0648	68.9448 , 139.7588	7.63e-09	+++??-+++-+--+-+++++--++++++	11.5
cg02997316	1	LMNA	-125.859	21.7899	-168.5672 , -83.151	7.65e-09	--+-----------+---+-+-----++	24.2
cg12655416	17	ORMDL3	98.917	17.126	65.35 , 132.484	7.66e-09	++-+++++++++++++++++--++++++	0
cg09187007	1	MEGF6	46.5875	8.06834	30.7736 , 62.4015	7.74e-09	+++-+-+++++++-++++++-+++-+++	0
cg27485596	13	ARHGEF7	-34.5435	5.98279	-46.2697 , -22.8172	7.75e-09	----?+------------+---+-+---	41.5
cg20236995	1	PRDM16	91.6046	15.8708	60.4977 , 122.7114	7.84e-09	++++++++-++--+++++++++-+++++	28.4
cg05294455	17	MYL4	62.5696	10.8424	41.3185 , 83.8206	7.89e-09	+++++-+++++-++-?+++++++++-++	17
cg10576725	14	MMP14	-80.7077	13.9899	-108.1278 , -53.2876	7.97e-09	--------+--+--+-----+-------	19.3
cg26906737	1	TMEM206	-72.3043	12.5347	-96.8724 , -47.7363	8.01e-09	-+++?----?----------+-------	48.3
cg00253658	16	FTO	-32.7123	5.67468	-43.8347 , -21.5899	8.19e-09	-+-?------------------++----	0
cg04454050	6	TREML1	-98.2981	17.0563	-131.7285 , -64.8677	8.26e-09	----+--------+------+-+---++	0
cg08571918	2	LINC01114	45.9685	7.9804	30.3269 , 61.6101	8.4e-09	+++++++++++++++?++-++--++--+	35.8
cg08362785	22	MKL1	80.3487	13.9492	53.0084 , 107.6891	8.41e-09	++++++++++++-++?++----++++-+	0
cg16723994	17	TSPOAP1	69.3679	12.0446	45.7605 , 92.9753	8.45e-09	+-++++++++++-+-+++++-+-++--+	43
cg08857310	17	LOC100507351	-143.886	24.9953	-192.8771 , -94.8956	8.59e-09	--------+-------------+-----	8.2
cg13563026	4	ATP10D	-54.9842	9.55957	-73.721 , -36.2475	8.83e-09	-+----------+-+--+--+-+---+-	37.5
cg18316974	1	GFI1	40.9424	7.12259	26.9822 , 54.9027	9.02e-09	+-+-++-++++++++?+++?-++++-++	58.7
cg08818716	7	RADIL	90.793	15.796	59.8328 , 121.7533	9.04e-09	-+++++++-++++++?+++-++-+++++	30.1
cg21703988	12	EP400	52.1754	9.07794	34.3827 , 69.9682	9.06e-09	++++++++++++-++-++-+++++++++	35.7
cg24953596	1	MEGF6	57.2976	9.9691	37.7581 , 76.837	9.06e-09	++++-++++++-+++?+++++-+++-++	15.8
cg09427944	16	ZNF688	134.721	23.4407	88.7769 , 180.6643	9.07e-09	++--?++++++++++-++++++++++++	44.8
cg14827643	4	RGS12	64.3059	11.1907	42.3721 , 86.2398	9.12e-09	+++-+-+-++++-+++++++-+--+--+	36.3
cg04830471	19	CCDC155	-105.629	18.383	-141.66 , -69.5987	9.14e-09	-++-?-------+-++-------+----	39.2
cg10547908	15	FAM174B	87.9783	15.3131	57.9647 , 117.9919	9.18e-09	+-++-++-++++++--++++++-+++-+	35.5
cg14975410	3	TNIK	-48.8355	8.50156	-65.4986 , -32.1725	9.23e-09	--++-------+-++---+---+-----	45.7
cg06870470	19	DOCK6	-53.4742	9.31273	-71.7272 , -35.2213	9.35e-09	-----+-+----++----+--------+	3.8
cg26165146	12	ARNTL2	-53.0851	9.24641	-71.208 , -34.9621	9.4e-09	------------+-++-----+-----+	31.6
cg02431260	11	ESAM	76.7364	13.3778	50.5159 , 102.9569	9.69e-09	++++++++++++++-?+++++--+----	31.7
cg23364711	13	COL4A1	-44.3537	7.73355	-59.5115 , -29.196	9.74e-09	-----------------+--+-+-+++-	9.1
cg23684410	11	SIK3	-55.1079	9.61212	-73.9477 , -36.2681	9.86e-09	--+--+--------+---+-+-+---+-	8.9
cg03444940	16	TSC2	54.5666	9.51884	35.9097 , 73.2235	9.9e-09	+++??+++++++-+-+++++---+++-+	0
cg08250921	16	BANP	47.2129	8.24059	31.0614 , 63.3645	1.01e-08	+-+++-+++++--+--++++++++++++	41.4
cg21601493	13	IRS2	94.4239	16.4796	62.1238 , 126.724	1.01e-08	+++??+++++++--++++-+++-+++-+	32.3
cg08530838	5	TRIM36	82.8217	14.4647	54.4709 , 111.1725	1.03e-08	+++-++++++++++--+++++++++-+-	45.9
cg20539142	8	CHRNA6	-53.3122	9.31177	-71.5633 , -35.0611	1.03e-08	---?-+-----+--+--++-+-------	61.2
cg24727480	12	KCTD10	67.4851	11.7854	44.3857 , 90.5845	1.03e-08	+++-++++-+++-++-++++--++++++	37.3
cg07565551	2	OSBPL6	-69.462	12.1347	-93.2461 , -45.678	1.04e-08	--+---------+----+-----+----	32
cg07970325	6	PRDM1	-68.1571	11.907	-91.4948 , -44.8194	1.04e-08	---?------------------+-+---	35.9
cg12341429	2	TANK	-92.1574	16.1035	-123.7202 , -60.5945	1.05e-08	----?--------++?-----------+	0
cg15542713	1	HIVEP3	29.856	5.21736	19.63 , 40.082	1.05e-08	--++?+-++++--+--++++--+++-++	55.8
cg19320261	1	ROR1	89.6838	15.6776	58.9558 , 120.4118	1.06e-08	-++++-++++++++-?+++++-+-++-+	54.3
cg05141333	8	PLEC	102.51	17.9262	67.3747 , 137.6453	1.08e-08	+++++++++++-+++?++++-+-++--+	7.1
cg25225070	11	WEE1	-56.8685	9.9472	-76.365 , -37.372	1.08e-08	+-----------+-+------+------	51.2
cg21221712	15	AKAP13	-74.3315	13.0053	-99.8218 , -48.8413	1.09e-08	--+---------+--+-++---------	5.3
cg12050271	1	LINC00982	39.6802	6.94274	26.0724 , 53.288	1.1e-08	+++++++-+++-+++?++++++-+++++	7.4
cg23369670	14	XRCC3	56.1674	9.83216	36.8964 , 75.4384	1.11e-08	++--++++++++++++++++++-+-+++	42.9
cg07102001	16	KLHDC4	61.1833	10.711	40.1897 , 82.1769	1.12e-08	-+++-+++++++---+++++-+++++-+	12.3
cg06685437	17	RAI1	64.2837	11.2611	42.2119 , 86.3555	1.14e-08	+-+++-++++++-+--++-+++-++-++	37.2
cg18033092	11	C11orf49	-61.0317	10.693	-81.9899 , -40.0735	1.15e-08	-----------+-----++---------	4.8
cg25963412	4	ACOX3	50.1938	8.79449	32.9566 , 67.431	1.15e-08	++++--++-++--++?+++++-++-+++	24.5
cg09109520	16	ADGRG1	72.6321	12.731	47.6793 , 97.5849	1.16e-08	++-++-+++++--+-++++++-++++++	9.1
cg04460609	4	LDB2	-51.2878	8.99075	-68.9096 , -33.6659	1.17e-08	----+------++----+----+---+-	23.7
cg12160087	12	BICDL1	67.0641	11.7572	44.0199 , 90.1083	1.17e-08	+--+++-+-++----?++++-++++-++	24.8
cg02068356	1	ROR1	-81.1345	14.2325	-109.0301 , -53.2389	1.19e-08	-+-+-----------?---++-+--+--	36.1
cg19520763	3	ACVR2B	-58.5511	10.2705	-78.6813 , -38.4209	1.19e-08	++---+--------+-----+-------	41.6
cg04608933	11	KCNQ1	108.277	18.9997	71.038 , 145.5169	1.21e-08	+++-?++++++++-+-++-+---++--+	40.4
cg14909179	11	CHID1	35.1231	6.16648	23.0368 , 47.2094	1.23e-08	+-++?+++-+++++-+++++--?+-+?+	24.6
cg23387597	10	ITPRIP	79.5064	13.9608	52.1433 , 106.8695	1.23e-08	++-+?+++-+++--++++++--+-++-+	43.3
cg10401362	7	DNAJB6	53.4467	9.38565	35.0508 , 71.8426	1.24e-08	+---+-+-++++-+++++-+++-+++++	51.7
cg06535156	6	TIAM2	87.9694	15.4531	57.6813 , 118.2574	1.25e-08	++++++++++++-++-++-++-+-++++	33.9
cg15513620	1	ZNF697	-89.1197	15.6555	-119.8044 , -58.435	1.25e-08	-----+-+----+-+---+--------+	32.8
cg05935520	5	CDH18	-60.9544	10.7109	-81.9478 , -39.961	1.26e-08	------+-------+--++-+-+-----	14.4
cg05894462	7	PTPRN2	55.4509	9.7517	36.3376 , 74.5642	1.3e-08	++++-++++++--+-+++++-+-+++++	42.7
cg00180447	3	CHST13	-42.3016	7.44233	-56.8885 , -27.7146	1.32e-08	---+--------++++-++--++--+--	52.1
cg13995854	7	ST7	-42.5429	7.48804	-57.2195 , -27.8664	1.34e-08	----?---+------?--+--------+	21.7
cg16190225	7	C7orf50	61.1144	10.7569	40.0309 , 82.1979	1.34e-08	+--+++++-+++++++++-+++++++-+	0
cg26709300	16	BOLA2	53.7803	9.46754	35.2239 , 72.3367	1.34e-08	++++++-+++++++++++++-+-+++-+	43
cg21684021	1	CELSR2	-69.018	12.153	-92.8378 , -45.1982	1.35e-08	----------+-----------------	0
cg01693350	11	WT1	-30.5876	5.38718	-41.1465 , -20.0287	1.36e-08	-----+--+----------------+++	0
cg08471846	19	PTBP1	71.9835	12.6805	47.1297 , 96.8372	1.37e-08	++-+++++-+++++++++-+++--+-++	30.3
cg12593793	1	LMNA	-88.5538	15.5986	-119.127 , -57.9805	1.37e-08	---+--------+-------+-+----+	14.5
cg01619846	19	UHRF1	77.4053	13.6371	50.6766 , 104.134	1.38e-08	++++-++++++++++-++++-++++-++	22.1
cg20865778	11	TCIRG1	88.7135	15.6319	58.0749 , 119.3522	1.39e-08	+++??-++++++--+-++++++++++-+	44
cg22386583	17	RPTOR	-44.0587	7.76491	-59.2779 , -28.8395	1.39e-08	-----------+---?-+--------++	0
cg02821342	7	LINC-PINT	-68.4487	12.0682	-92.1023 , -44.7951	1.41e-08	----?--+------+?--+-----+---	46.1
cg23663547	17	CCR7	73.7768	13.0066	48.2839 , 99.2696	1.41e-08	++---+++++++-+--++++---+++++	38.1
cg19914554	17	CD7	83.052	14.6459	54.346 , 111.7579	1.42e-08	---++-++++++++--++-+---+++++	34.1
cg21609804	11	MARK2	77.3529	13.6392	50.62 , 104.0858	1.42e-08	++++++++-+++++++++++---+++-+	0
cg01899318	16	ZNF19	-60.9526	10.7594	-82.041 , -39.8642	1.47e-08	+--------------------+------	31.7
cg15772924	12	HOXC4	-51.312	9.05687	-69.0635 , -33.5606	1.47e-08	++-+---+--------------+----+	0
cg15035133	22	CDC42EP1	-68.9115	12.1712	-92.767 , -45.056	1.5e-08	----------------------+----+	26.1
cg10665891	12	MAP1LC3B2	-32.0546	5.66652	-43.161 , -20.9482	1.54e-08	---------+-----------++-+--+	18.9
cg11261850	11	LRRC32	62.3978	11.0295	40.7799 , 84.0157	1.54e-08	+++++++++++-+++-+++++-++-+++	0
cg25399309	5	MAST4	64.9155	11.4793	42.4161 , 87.415	1.56e-08	+++-++++++++++-+++++--++++++	0
cg07565042	11	RNF141	-62.7909	11.1053	-84.5572 , -41.0245	1.57e-08	-+----------+-+--+--+--+----	43
cg24746938	2	DOCK10	-62.5878	11.073	-84.2909 , -40.8848	1.58e-08	--------+---+--?------------	0
cg07243202	8	NDRG1	-59.833	10.5878	-80.5851 , -39.081	1.59e-08	------------+-----------+---	41.4
cg06872313	12	ATF7IP	-61.7285	10.93	-83.1513 , -40.3058	1.63e-08	---?+--+---+------------+---	13.4
cg08422803	21	ITGB2	61.9374	10.9666	40.4429 , 83.4319	1.63e-08	++++++++++---+--++-+++++++++	45.1
cg07702888	1	RHBG	-79.999	14.1675	-107.7672 , -52.2308	1.64e-08	--+-------+++-+?-----+-----+	39.7
cg00205605	1	FAM213B	78.0988	13.8352	50.9819 , 105.2157	1.65e-08	++++-++++++--+++++++-++-+--+	25.3
cg04554131	1	RUNX3	72.0155	12.7582	47.0094 , 97.0216	1.66e-08	-++++++++-++-+-++++++-+++++-	0
cg05503887	11	EHF	-73.2429	12.977	-98.6779 , -47.8079	1.66e-08	-----------++-++---------+--	0
cg00940560	8	MIR548O2	-54.226	9.61144	-73.0645 , -35.3876	1.68e-08	---?+------+-------------++-	0
cg17470397	3	OPA1	-72.782	12.9009	-98.0679 , -47.4962	1.69e-08	--+-?----?-++-++--+---+-+-++	22.5
cg03543319	2	PROKR1	-66.2802	11.7571	-89.324 , -43.2363	1.73e-08	-----+-----+++--------+---++	0
cg02988730	1	AMPD2	70.8859	12.5836	46.2221 , 95.5497	1.77e-08	++++++-++++-++++++-+-++++--+	37.5
cg20364632	6	CRISP2	-47.4547	8.42371	-63.9651 , -30.9442	1.77e-08	--------------+--++-+++---+-	30.3
cg14184907	12	LINC00936	-81.8163	14.5411	-110.3168 , -53.3159	1.84e-08	-++--+-+----+-+-----+-+-+---	20.8
cg08970648	3	CISH	55.128	9.80379	35.9126 , 74.3434	1.88e-08	++++++++++++-+-++++++-+----+	52.7
cg08817867	17	ALDH3A1	-57.44	10.2174	-77.4661 , -37.4138	1.89e-08	-----+-+-----++---+--------+	35.4
cg16097041	1	FLAD1	53.8995	9.58734	35.1083 , 72.6907	1.89e-08	+++-++++++++-+++++++-+++++++	35.7
cg15031409	1	CASZ1	75.2902	13.3951	49.0358 , 101.5446	1.9e-08	+-++--+++++-++++++++++++++-+	36.9
cg13222915	1	C1orf21	-64.9766	11.5659	-87.6458 , -42.3074	1.93e-08	----?-----+-+--?-----------+	19.7
cg07814318	15	KLF13	53.6952	9.55817	34.9612 , 72.4292	1.94e-08	++++++-++++--++++++++++++--+	13
cg01303055	11	GALNT18	-95.031	16.919	-128.1923 , -61.8698	1.95e-08	---+--------+---------+-+---	29.7
cg04522498	8	TRAPPC9	57.718	10.2789	37.5713 , 77.8647	1.96e-08	+++++-++++++++-+++-+-+-+++--	0
cg03144619	1	GALNT2	29.3189	5.224	19.0798 , 39.5579	2e-08	++-++++++++-+++?++-++-+-+-++	41.4
cg17725019	22	PIK3IP1	63.1106	11.2453	41.0698 , 85.1514	2e-08	++++?++++-+--+++++-+++++++++	16.3
cg17828445	12	MARCH9	97.9873	17.4597	63.7662 , 132.2083	2e-08	++++--+++-++-++++++?+-++++++	9.6
cg21369801	17	CSNK1D	52.9796	9.44012	34.477 , 71.4823	2e-08	+++-+-+-++++-+++++-+++-+++++	19.7
cg08706907	11	ATG13	90.0581	16.0558	58.5886 , 121.5275	2.03e-08	+-++-+++++++++++++++--++++++	3.9
cg22030032	19	RAB4B-EGLN2	86.1413	15.3563	56.0429 , 116.2397	2.03e-08	++++++++-++--++-++++--++++-+	35.6
cg21646032	3	RARB	-63.5236	11.3278	-85.7262 , -41.3211	2.05e-08	-----+------+-----+---+-+---	0
cg17038235	5	ERGIC1	49.5618	8.84594	32.2237 , 66.8998	2.11e-08	++-++++-++++++++++++++-++-+-	9
cg13638420	11	WT1	-48.1432	8.59449	-64.9884 , -31.298	2.12e-08	---+-+--------------+++----+	15.5
cg01994290	14	PLEKHG3	-92.9404	16.6026	-125.4814 , -60.3993	2.17e-08	-+-?---+----++---+----------	23.5
cg10147974	12	WNT5B	-49.2555	8.7987	-66.501 , -32.0101	2.17e-08	-+----------+-+-----+++-----	39.5
cg00886780	6	SCUBE3	-45.6429	8.15754	-61.6317 , -29.6542	2.2e-08	---------------?-------+----	9.3
cg23545458	12	POLE	55.3311	9.89287	35.9411 , 74.7211	2.23e-08	+-+-?+++++++-+-+++++++++++-+	29.9
cg06001419	7	FOXK1	-56.4519	10.094	-76.2361 , -36.6677	2.24e-08	----?---------+------+-----+	20.7
cg23059461	10	PRF1	-89.711	16.0481	-121.1652 , -58.2567	2.27e-08	-+-+-------+----+-----+-+---	26.5
cg26230651	2	PAX8	70.0593	12.5339	45.4927 , 94.6258	2.28e-08	++-?+-++++++++-+++++++-+-+++	0
cg10615591	20	RTEL1-TNFRSF6B	82.1003	14.6909	53.306 , 110.8945	2.29e-08	++++++++++++++-?+-++++-+++++	2.2
cg12048965	10	KLF6	-39.0944	6.99573	-52.806 , -25.3828	2.29e-08	---?---+--------+----++-----	18.2
cg20141108	1	UCK2	-55.7287	9.97199	-75.2738 , -36.1836	2.29e-08	-+---------+---?-+------++--	0
cg27108424	17	LOC100507351	67.372	12.0563	43.7417 , 91.0022	2.3e-08	+++++++-++++++++++++++-+-+++	45.7
cg06079495	10	RAB11FIP2	-69.0066	12.3581	-93.2285 , -44.7846	2.35e-08	-----------------+-+---+----	49.8
cg09121543	17	LIMD2	60.1205	10.7683	39.0147 , 81.2262	2.36e-08	+++--+++++++--++++++++-+++-+	23.8
cg14875081	2	DUSP2	88.1449	15.7891	57.1982 , 119.0915	2.37e-08	++-++++++++--++-+++-+-++++-+	25.9
cg07699546	1	NAV1	-61.7651	11.0667	-83.4559 , -40.0744	2.39e-08	---?+--------+++----+-+-----	16.5
cg18219522	11	MAML2	-56.2977	10.0876	-76.0694 , -36.5261	2.39e-08	-+----------+--?-+----------	0
cg26604214	17	RAP1GAP2	-71.8176	12.8735	-97.0496 , -46.5857	2.42e-08	-----------+--+--++----+----	38
cg03467001	1	RGL1	-62.2277	11.1551	-84.0917 , -40.3637	2.43e-08	--++-------+-----++-+-------	27.8
cg09704401	2	SERTAD2	-52.3919	9.39459	-70.8053 , -33.9785	2.45e-08	-----+--------+--+-----+----	43.5
cg14387452	9	MLLT3	-64.5335	11.5742	-87.219 , -41.848	2.47e-08	--+-------+-+++---+--------+	36.9
cg00075967	15	STRA6	51.1688	9.17926	33.1775 , 69.1602	2.48e-08	+++++-+++++--+-+++++-+++++-+	0
cg15741354	8	SGK223	-36.3502	6.52285	-49.135 , -23.5654	2.51e-08	---+--------+--+-----++-----	27.6
cg14154456	6	IBTK	-36.3982	6.53256	-49.202 , -23.5943	2.52e-08	--+---------+----++---+-----	39.9
cg03354508	6	STXBP5	-63.6409	11.4247	-86.0333 , -41.2485	2.54e-08	--+??------+---?-----+++-+--	25.8
cg13937905	12	RARG	77.1706	13.854	50.0167 , 104.3245	2.54e-08	++-++-+++++-++++++-+++++++-+	17.9
cg16597079	6	TRERF1	-77.1861	13.8554	-104.3427 , -50.0296	2.54e-08	------------+-+?--+---+-----	25.3
cg19851563	19	GNG7	30.2953	5.43847	19.636 , 40.9548	2.54e-08	+++-++-++++-+-++++++++++-+-+	6.3
cg20386404	1	PTPN14	-57.3835	10.3064	-77.5841 , -37.183	2.58e-08	-----++++--++--+----+-+-----	0
cg22164298	4	ANK2	-66.489	11.9421	-89.8955 , -43.0825	2.58e-08	---?-+----+-------+--+-+----	38.9
cg06634552	6	RNF182	-75.3626	13.5383	-101.8976 , -48.8276	2.6e-08	----+------+---+----++----+-	12.2
cg25144135	1	TNFRSF18	-66.4035	11.9286	-89.7836 , -43.0235	2.6e-08	-------+-------------+-----+	33.6
cg20370909	7	RADIL	50.3937	9.05427	32.6473 , 68.14	2.61e-08	++-++-+++++-++-+++++---+-+-+	0
cg11067407	11	ZW10	-56.1941	10.0981	-75.9865 , -36.4018	2.63e-08	-----+-----+---?------+--+--	0
cg21520055	14	NDRG2	-60.1992	10.8209	-81.4081 , -38.9903	2.65e-08	----?------+--++--+---+-----	0
cg14071925	19	LILRA2	-71.4207	12.841	-96.5891 , -46.2524	2.67e-08	---??---+--+------+-----+---	47
cg05349624	21	COL18A1	43.6512	7.84935	28.2665 , 59.036	2.68e-08	+++++-++-++-++--++-+---+-+++	14.5
cg11659663	11	MACROD1	-58.9314	10.5964	-79.7003 , -38.1625	2.68e-08	-------+-+-----?----+-------	12.9
cg26073542	11	OSBPL5	-84.7574	15.2499	-114.6471 , -54.8677	2.73e-08	-+-??+-----+--+------++----+	23.5
cg10780778	6	BTN3A2	-54.6313	9.83238	-73.9028 , -35.3599	2.76e-08	---??------++--+--+-+--+----	11.6
cg08380440	11	MIR4686	45.0773	8.1181	29.1658 , 60.9888	2.81e-08	++++?-+-++++-++?++-+++?+++?+	0
cg24328944	13	DZIP1	-73.2474	13.1907	-99.1012 , -47.3936	2.81e-08	+-----++-+----+-------+----+	44.3
cg00694258	10	ARHGAP12	-37.916	6.82896	-51.3008 , -24.5313	2.82e-08	-----------+-----+---++-+---	40
cg21542842	4	SEPT11	-88.8736	16.0076	-120.2486 , -57.4986	2.83e-08	---+-------+-----+--+-+-----	35.4
cg27588384	3	LIMD1	-63.1587	11.3775	-85.4586 , -40.8587	2.84e-08	--+--------+----------------	0
cg04497992	16	PRR35	-73.3738	13.2221	-99.2891 , -47.4584	2.87e-08	----+---------+--+---+-+----	35
cg00567703	12	HOXC4	-35.9973	6.4891	-48.7159 , -23.2786	2.9e-08	---+---+----------+---+---++	0
cg05208178	2	INPP5D	92.137	16.6142	59.5731 , 124.7009	2.93e-08	--++++++-+++++++++++--+++-++	9
cg09990613	20	TCEA2	70.4216	12.7011	45.5275 , 95.3157	2.95e-08	+++++-++++++-+-+++++-+-+++++	0.4
cg26340740	11	MPEG1	-50.2499	9.06326	-68.0139 , -32.4859	2.95e-08	--+-+---+------+------+---+-	0
cg13888509	15	STRA6	59.9165	10.8082	38.7324 , 81.1005	2.96e-08	+++++-+++-+--+-+++++-++-++-+	23
cg26236972	2	COPS8	-41.9616	7.56944	-56.7977 , -27.1255	2.96e-08	-----------++-------+-----+-	0
cg27292710	11	KCNJ5	69.7488	12.5898	45.0728 , 94.4249	3.02e-08	+-++--+++++++++++++++--+----	1.7
cg00222472	1	PBX1	36.4016	6.57194	23.5206 , 49.2826	3.04e-08	++++-++++++++++++-++++-+++++	45
cg10423607	8	CPA6	-44.1431	7.9748	-59.7737 , -28.5125	3.11e-08	----?--?+---+-+?--?-------?-	25.6
cg13430173	9	PALM2-AKAP2	-83.0118	15.0065	-112.4246 , -53.5991	3.17e-08	-+------------+--+-----+----	14.1
cg23693749	18	SALL3	48.792	8.82158	31.5017 , 66.0823	3.18e-08	+++++++-+-+++--+++-+-+++++-+	8.9
cg23513600	3	TNIK	59.2475	10.7157	38.2448 , 80.2503	3.22e-08	++-++++-++++-+++++-++++++-++	0
cg04221877	1	RUNX3	89.0661	16.1144	57.482 , 120.6502	3.26e-08	+++-+++-++++-+-+++-+++++++--	42.7
cg10430742	11	KCNJ1	-61.0853	11.0553	-82.7536 , -39.417	3.29e-08	-+---------+--+------+---+--	0
cg21597811	8	ZHX2	-56.5031	10.2299	-76.5536 , -36.4525	3.33e-08	-----------++-+-----+-+-+--+	0
cg05814312	10	PTCHD3P1	-45.1042	8.16826	-61.114 , -29.0945	3.35e-08	--+----------++---+---------	0
cg26003140	17	CCDC42	-59.6243	10.8013	-80.7949 , -38.4537	3.39e-08	------+-----+-----+----+----	23.4
cg11417612	12	BTBD11	-71.2512	12.9207	-96.5758 , -45.9266	3.5e-08	----+-+-------++------------	45
cg01878708	2	MIR5702	-36.7905	6.67267	-49.8689 , -23.712	3.52e-08	---+-------++----++-+-+-+---	29.8
cg25371590	2	GLI2	-32.2228	5.84441	-43.6778 , -20.7678	3.52e-08	--+?-------+--------+++-++--	24.9
cg18857467	1	HDAC1	-50.9656	9.24642	-69.0886 , -32.8426	3.55e-08	+-------------+-+----+------	39.5
cg19323059	7	INHBA-AS1	-55.3994	10.0543	-75.1059 , -35.693	3.59e-08	-+--++--+--++-+---+------+--	17.1
cg00350296	11	CD248	81.6428	14.8189	52.5977 , 110.6878	3.6e-08	+--+---++++-++-+++++-+++++++	46.5
cg20663495	17	B3GNTL1	72.4125	13.1454	46.6474 , 98.1775	3.62e-08	+-+?--++++++-+--+++++-+++--+	42.8
cg06648759	13	LINC00598	-46.8466	8.50871	-63.5237 , -30.1695	3.68e-08	-----------------++---+-----	52.8
cg19265972	17	ASGR1	93.4417	16.9728	60.1749 , 126.7085	3.68e-08	++++++++++++-++?+++-+-++++++	36.3
cg21141329	17	COL1A1	74.003	13.4413	47.6582 , 100.3479	3.68e-08	+-++--++++++-+++++++-+-+---+	46.7
cg05504759	3	DUSP7	84.4599	15.3419	54.3898 , 114.5299	3.69e-08	+++++-++++++-+++++-+-+++++++	0
cg04523868	11	MAP4K2	85.312	15.5058	54.9206 , 115.7034	3.76e-08	+++-+++++++++++?+++++++-++++	26.8
cg21785384	1	TMCC2	63.2272	11.4933	40.7004 , 85.754	3.77e-08	+++??-+++-++-++?++-+++-++--+	40.6
cg21279874	13	MCF2L	56.2238	10.2264	36.18 , 76.2676	3.84e-08	+++?+-+++++++++-++-+++-+-+-+	60.7
cg01911077	11	SF1	62.6059	11.3963	40.2692 , 84.9426	3.94e-08	+++++++++++++-+-++-++-++++++	0
cg01143068	15	STARD9	-54.518	9.92679	-73.9745 , -35.0615	3.97e-08	------------+++--++---+-----	32.2
cg27477277	21	TRPM2	-58.4523	10.643	-79.3126 , -37.592	3.97e-08	---+++--+----+-+------+-+---	3.2
cg00605777	2	SEMA4C	76.9459	14.0113	49.4837 , 104.4081	3.98e-08	++-++-+++++-++++++++++-++-++	2.2
cg14704980	7	INHBA	-46.8963	8.54057	-63.6358 , -30.1568	4e-08	--+-?------+-----+--+-+-----	13.7
cg24635112	13	RASA3	64.9434	11.8278	41.7609 , 88.1259	4e-08	++-+--++++++-+++++-++--++--+	14.1
cg00591515	19	LENG8	88.942	16.1995	57.1909 , 120.693	4.01e-08	+++?++++-++-+++-++++-+-+-+++	0
cg03048432	14	NIN	-48.5686	8.84875	-65.9121 , -31.225	4.05e-08	--------+-+---+-----+---+---	8.5
cg25215890	1	CD48	51.6536	9.41196	33.2062 , 70.1011	4.06e-08	+++++-++-++-++-+++++++++++++	0
cg08755703	16	IRX3	-42.5901	7.76526	-57.81 , -27.3702	4.14e-08	--+--+---+-+---+----+-------	24.2
cg24707889	21	ITGB2	51.3101	9.35665	32.9711 , 69.6492	4.16e-08	+++++-++++++-+++++-+-++-++++	53.4
cg08032483	16	CLCN7	48.3725	8.8227	31.08 , 65.665	4.19e-08	++++--++++++++--++++-+-+++-+	0
cg12434362	5	MIR583	-42.2896	7.71667	-57.4142 , -27.1649	4.25e-08	--+----+----+-------+-+-----	17.8
cg20357806	4	PPBP	-67.4899	12.315	-91.6273 , -43.3525	4.25e-08	----++---?--+----+----+-+--+	0
cg23983783	13	N4BP2L1	-65.5217	11.9579	-88.9592 , -42.0842	4.27e-08	----+-----+-----------+-----	16.3
cg09255514	16	ABCC1	-42.7446	7.80218	-58.0369 , -27.4524	4.29e-08	---+-------++-++------+-----	31.9
cg16001165	4	JADE1	-57.9513	10.579	-78.6862 , -37.2165	4.3e-08	------------+-+--+--------+-	30.3
cg02106534	16	CDIP1	111.266	20.3416	71.3969 , 151.136	4.5e-08	+-+++-+++++--++++++++++-++++	14.8
cg02232751	11	LDHA	83.2889	15.228	53.4421 , 113.1358	4.51e-08	++-+?-++++++-++-++++-+--+-++	42.6
cg12713583	19	ARID3A	-37.658	6.88561	-51.1538 , -24.1622	4.52e-08	-----+----++---?-++---+-----	61.6
cg14992524	8	SOX7	60.3955	11.0425	38.7523 , 82.0388	4.52e-08	+++++-++--+-+++?+++-+--++-++	34.4
cg03726357	8	DUSP4	-60.3785	11.041	-82.0189 , -38.7381	4.54e-08	-----------++-+-------+----+	46.9
cg22441770	1	CRTC2	57.3812	10.494	36.813 , 77.9494	4.55e-08	+++++++++++-++++++++-+++++-+	0
cg02835421	1	IPO13	-89.6539	16.3977	-121.7935 , -57.5144	4.57e-08	------------+-+--++---+----+	21.8
cg07815836	19	ZNF274	-59.0348	10.7988	-80.2005 , -37.8691	4.58e-08	+--++--------+-?-----++-++--	29.7
cg12233463	15	TMC3	-39.7697	7.27836	-54.0353 , -25.5041	4.65e-08	----?+-++--++-+---+-+-+---?-	39.3
cg10601624	12	PLEKHG6	-48.9467	8.95811	-66.5046 , -31.3888	4.66e-08	-+++--------+-+--+---+------	21.5
cg25656283	10	ERCC6	-48.3851	8.85574	-65.7423 , -31.0278	4.66e-08	---------++-----------------	8.9
cg15226659	19	SEMA6B	-57.3489	10.4964	-77.922 , -36.7759	4.67e-08	----+------+----------------	0
cg03327570	2	ZEB2-AS1	-82.5338	15.1081	-112.1457 , -52.922	4.68e-08	--------+-----+--+----+-----	49.6
cg22593432	13	FRY	-67.8144	12.4153	-92.1484 , -43.4804	4.7e-08	------+----------+--+------+	38.3
cg16145216	1	HIVEP3	45.371	8.30795	29.0875 , 61.6546	4.73e-08	++++-+-++++--+--++++--+++-++	55.4
cg07696514	8	IKBKB	72.7349	13.3192	46.6294 , 98.8405	4.74e-08	+++++++-+++--++-++++++++++++	0
cg23401251	2	IFT172	-62.3431	11.4214	-84.729 , -39.9571	4.8e-08	--------++-----?-----+-+----	29
cg10814005	14	GPR68	86.513	15.8558	55.4357 , 117.5904	4.86e-08	+++--+++++++++--+++++-+++-++	22.3
cg09174162	7	MAD1L1	34.4437	6.3128	22.0706 , 46.8168	4.87e-08	+++++++++-+++-+?++-+++++++++	15.5
cg14001239	10	PTCHD3P1	36.1799	6.63266	23.1799 , 49.1799	4.9e-08	++++-++++++++-+++++-+++++--+	0
cg18515868	4	MAEA	75.9142	13.9187	48.6336 , 103.1949	4.92e-08	+--+++-+-++-++-+++-+++-+++-+	34.9
cg26881863	8	TRAPPC9	61.6524	11.3057	39.4932 , 83.8117	4.95e-08	+++-?-++++++++++++-+++++++-+	0
cg14550985	11	RIN1	71.8911	13.1887	46.0413 , 97.7408	5.01e-08	++++++++-++--++-++++-+++-+++	0
cg14751481	12	FBRSL1	60.8955	11.1733	38.9959 , 82.7951	5.03e-08	+++++--++++++-++++++++-+++-+	7.6
cg18402166	17	PLEKHM1P1	67.0467	12.3035	42.9318 , 91.1617	5.05e-08	+++++-+++?+++++?++++++--++-+	16
cg05863841	2	SPR	-54.2205	9.9519	-73.7262 , -34.7148	5.09e-08	----?----?++-----++-+-+-----	58.1
cg03930153	3	TBL1XR1	-33.4648	6.14276	-45.5046 , -21.4249	5.1e-08	----?-----+---+?-++---------	42.6
cg20014974	1	SLC45A1	75.4701	13.8534	48.3174 , 102.6228	5.1e-08	+++-++++-+++++++++++++-+++++	21.3
cg14276580	13	COG6	-55.6647	10.2193	-75.6945 , -35.6348	5.12e-08	---+--------+-+--++---++----	53.6
cg10928544	14	CCDC88C	40.7658	7.48719	26.0909 , 55.4407	5.19e-08	++++++++++++-+--+-++++++++-+	0
cg00431549	12	MGP	-46.9221	8.61918	-63.8157 , -30.0285	5.21e-08	-------++--+--+-----+-------	0
cg04324917	16	KLHDC4	53.4725	9.82376	34.2179 , 72.727	5.23e-08	++++++++++++--+?++-+-+++++-+	13.6
cg04682802	20	BTBD3	-34.6284	6.36158	-47.0971 , -22.1597	5.23e-08	-------+---++-+--+----+-----	29.6
cg08026735	2	VWA3B	-64.1461	11.7851	-87.2449 , -41.0473	5.24e-08	---+-------+---+--+-+----+--	28.1
cg24973755	4	MAEA	59.1941	10.8762	37.8769 , 80.5114	5.25e-08	+--+++++++++-+-+++-+---+++++	30.1
cg26104196	1	IGSF9	-90.4396	16.617	-123.0089 , -57.8703	5.25e-08	-----------+--+?--+-+++-+--+	49.2
cg11879354	6	SYTL3	85.2059	15.6568	54.5185 , 115.8933	5.27e-08	+-++?-++-+++++++++++-+-+++++	51.8
cg05942111	12	RASSF3	-70.2109	12.9053	-95.5053 , -44.9166	5.31e-08	----+-------+-+-----++------	23.6
cg01110839	11	SLC39A13	63.7274	11.7155	40.7649 , 86.6898	5.34e-08	+++++++--++--++?++++-+-+++++	9.6
cg03059073	7	LINC00996	-49.0427	9.01627	-66.7146 , -31.3709	5.35e-08	-----+-----+---?----+-+--+--	9.1
cg03471593	16	LPCAT2	-44.3764	8.1606	-60.3712 , -28.3816	5.39e-08	--+??-------+-----+-+--++--+	34.4
cg17901584	1	DHCR24	-46.5953	8.56861	-63.3898 , -29.8008	5.39e-08	-------+----+-----+---+--+--	23.5
cg03247245	12	GRIP1	-75.4762	13.8815	-102.684 , -48.2684	5.41e-08	----?-----------------------	0
cg13963033	5	MARCH3	-50.2141	9.23498	-68.3147 , -32.1136	5.41e-08	----?-------+-+?-+---+------	40.7
cg05012661	4	KIAA0232	-36.9466	6.79638	-50.2675 , -23.6257	5.44e-08	-------+-------+-----+------	38.1
cg03047995	14	FITM1	-56.2708	10.3536	-76.5639 , -35.9777	5.48e-08	---+-----+----+---+-----+---	35.1
cg16520815	16	MGRN1	55.3556	10.188	35.3872 , 75.3241	5.53e-08	++--++++++++-+++++-+--++++-+	25.5
cg22540040	12	RAP1B	-47.9201	8.82385	-65.2148 , -30.6253	5.61e-08	------------+-+?--+-+-------	26.6
cg10420527	11	LRP5	75.8834	13.9746	48.4932 , 103.2735	5.63e-08	+++++++++++-++++++++-+++++++	45.7
cg24527636	1	AHDC1	42.2238	7.77847	26.978 , 57.4696	5.69e-08	++++--++++++-+++++-+-+++++++	27.3
cg24842859	1	RUNX3	81.4151	14.998	52.019 , 110.8113	5.69e-08	+++++++++-+--+++++++-+++++-+	0
cg24129589	5	NKD2	-115.585	21.3083	-157.3493 , -73.8207	5.82e-08	+-----------+--?------+---++	0
cg13594630	12	KIAA1551	-65.5439	12.0858	-89.232 , -41.8558	5.85e-08	--+-+----+-+---?------+----+	0
cg04189326	14	CDC42BPB	-57.7299	10.646	-78.5961 , -36.8637	5.87e-08	-----------+--+--+---+------	16
cg23188579	4	SCOC	-67.5468	12.4594	-91.9671 , -43.1264	5.91e-08	---??------++----++---------	0
cg07858848	2	HAAO	-45.4235	8.38112	-61.8505 , -28.9965	5.97e-08	-------+--+-+-++-+----++----	17.3
cg13827209	9	TGFBR1	93.441	17.2439	59.6429 , 127.239	6e-08	++++++++-++-+++?+++++++-++++	0
cg15908975	7	GRM8	-35.8485	6.61786	-48.8195 , -22.8775	6.06e-08	--++----+-+---+-----+-----+-	37.6
cg08627825	22	LINC00229	68.9162	12.723	43.9791 , 93.8532	6.07e-08	++-++++++++++-+-+-++++++++++	0
cg04290133	7	GUSB	-117.415	21.68	-159.9077 , -74.9221	6.1e-08	----++------+-+------++++--+	50.8
cg17327171	2	RBMS1	-69.1615	12.7747	-94.1998 , -44.1232	6.17e-08	-----+------+---------+-+---	43.9
cg03850035	2	EPHA4	-58.6541	10.8381	-79.8967 , -37.4114	6.24e-08	---+-------++-+-----+--+----	44
cg21649604	22	RPL3	80.723	14.9174	51.485 , 109.9611	6.26e-08	+++?+-++--+++++-++++++++-+++	27.7
cg23033749	7	ST7	-47.9841	8.86785	-65.3651 , -30.6031	6.27e-08	--+-?---+----+------++----+-	0
cg06775523	1	MEGF6	39.5992	7.32167	25.2487 , 53.9497	6.36e-08	+++++-++++++--++++++-+++++++	0
cg26686361	16	IRF8	-54.7334	10.1204	-74.5693 , -34.8975	6.36e-08	---??------+----------+-++-+	8.4
cg20519581	20	LINC01270	-66.0382	12.2107	-89.9711 , -42.1052	6.37e-08	----?-------+--------+------	0
cg21220721	1	ACOT7	-68.0216	12.5779	-92.6742 , -43.3689	6.37e-08	----++--+--+--+--++--+------	47.3
cg13951007	1	LOC728989	-85.8053	15.8678	-116.9063 , -54.7043	6.39e-08	----+------------+--+-+-----	41.7
cg00410926	9	FAM166B	-56.373	10.4262	-76.8084 , -35.9376	6.41e-08	+-+?+------++-+------++-----	49
cg07850246	11	C11orf40	-47.5206	8.78915	-64.7473 , -30.2938	6.42e-08	----+------+--+---+-+-------	0
cg13009654	5	EGR1	95.4705	17.6575	60.8618 , 130.0793	6.42e-08	++-+++++--+++++++++++++-+--+	47.4
cg15206445	16	SPG7	66.338	12.2724	42.2842 , 90.3918	6.46e-08	++-+++++-++-++--++-+++-++--+	37
cg27648858	19	PIK3R2	-97.7044	18.0806	-133.1424 , -62.2665	6.52e-08	---+--+---++---?---+-----+--	62.9
cg03875678	14	GZMB	-58.6916	10.8624	-79.9818 , -37.4014	6.55e-08	---+-+------+---------+--+--	25.3
cg11387340	6	RPS6KA2	-67.3827	12.4718	-91.8275 , -42.9379	6.56e-08	---+-+----++---?------------	53.7
cg14209730	2	LGALSL	-80.1672	14.8406	-109.2546 , -51.0797	6.59e-08	---+-----------?---------+--	29.4
cg23227726	11	CLPB	-88.2035	16.3288	-120.208 , -56.199	6.6e-08	-----+----+----?--+---------	30.5
cg26833120	1	COL16A1	-53.6277	9.93024	-73.091 , -34.1645	6.65e-08	--+-+-------+-+-------+---+-	30.7
cg17276535	4	RGS12	43.2031	8.00064	27.5218 , 58.8843	6.67e-08	++++-++-+++-++--++++++++++++	21.7
cg16555466	14	CATSPERB	-43.7394	8.10076	-59.6169 , -27.8619	6.69e-08	-+---+-----++-+-------+----+	50.6
cg26118943	5	SNX18	71.2451	13.1969	45.3792 , 97.111	6.72e-08	+--+++-+++++-++?++++-++++++-	29.9
cg15406387	4	ENPEP	-54.139	10.0301	-73.7979 , -34.48	6.75e-08	++-+-+--+------+----+-+-+---	35.1
cg22635096	21	ADARB1	73.7235	13.6583	46.9532 , 100.4938	6.75e-08	+++++-++--+--++?++++++++++++	34.2
cg01294327	19	SPPL2B	51.5619	9.55394	32.8362 , 70.2876	6.78e-08	+++++++++++++++?++-+++-+-+-+	0
cg21454485	1	CD84	-44.9745	8.33641	-61.3139 , -28.6351	6.85e-08	----++--------+?----++------	0
cg23623251	6	BMP6	-61.2423	11.3558	-83.4997 , -38.985	6.93e-08	------+----+--+---+--+-+----	24.9
cg05799596	13	RASA3	62.7246	11.6405	39.9092 , 85.54	7.11e-08	++++?++++++--++-++-+++-+++-+	11.9
cg19459094	5	GRK6	71.8804	13.3414	45.7314 , 98.0295	7.13e-08	++---+++++++-++++++++++-+-++	35.7
cg21193744	8	MCPH1	-114.266	21.2111	-155.8392 , -72.6917	7.16e-08	----?+------+------------+--	31.9
cg17163527	1	MEGF6	-48.7811	9.05643	-66.5317 , -31.0305	7.19e-08	--+--------+--+?------------	37.2
cg08787968	11	WT1	-32.2683	5.99252	-44.0136 , -20.5229	7.25e-08	-+---+--+---+-+----------+-+	11.6
cg09220326	3	CDCP1	-51.6355	9.59008	-70.432 , -32.8389	7.27e-08	-----------+--+---+--+--+-+-	0
cg26677394	6	RCAN2	-56.1772	10.4342	-76.6282 , -35.7262	7.29e-08	--+--------++-+?------+-+--+	36.9
cg10090414	8	LINC01300	31.7525	5.89874	20.191 , 43.3141	7.33e-08	++++++++++++++++++-+++++++-+	0
cg14527110	5	P4HA2	-77.4557	14.39	-105.6601 , -49.2513	7.34e-08	-----------+-----++---+----+	36
cg10512203	1	COL9A2	78.1221	14.5184	49.6661 , 106.5782	7.41e-08	++++--+--++-+++?+++++++-+-++	54.2
cg01066046	21	SCAF4	98.9131	18.3876	62.8735 , 134.9528	7.48e-08	-+++?-++-++--+++++-++++-+-++	24.8
cg05573767	6	RPS6KA2	29.0511	5.40188	18.4634 , 39.6388	7.53e-08	+-+--++++++-++--++++++++++-+	2.8
cg02589672	22	TEF	-117.017	21.7661	-159.6787 , -74.3555	7.61e-08	-------+--------------+----+	0
cg25138553	1	HSPG2	-57.2262	10.6455	-78.0915 , -36.361	7.63e-08	-----+-+--+---+?------------	0
cg19370689	7	FBXL13	-68.4259	12.73	-93.3767 , -43.4751	7.65e-08	------+----+--+-----+-------	0
cg27208052	16	MMP15	-63.7887	11.8672	-87.0484 , -40.5289	7.65e-08	--+-+--+--+---------------+-	0
cg07313835	1	POU2F1	-87.306	16.2436	-119.1435 , -55.4686	7.67e-08	----------+-+-+?-+-----+-+--	31.7
cg05922714	16	N4BP1	-47.0521	8.75493	-64.2118 , -29.8924	7.69e-08	---??--+-+----??-+-----?----	48.9
cg23473081	12	EMP1	-111.198	20.6936	-151.7577 , -70.6388	7.72e-08	-------+----+----+--+---+-+-	45.8
cg27563968	12	GPRC5A	69.6269	12.9613	44.2228 , 95.0309	7.79e-08	++++--++++++-++-++-+-+-+-+-+	43.2
cg23606023	16	CBFA2T3	-94.3154	17.5579	-128.7288 , -59.9019	7.8e-08	--+-+--+---+-+-+----+-+---+-	39.5
cg11935041	5	FAT2	-65.5378	12.2051	-89.4598 , -41.6157	7.89e-08	---?---------+-------+---+-+	27.7
cg22626522	22	TEF	-80.4306	14.9808	-109.793 , -51.0683	7.92e-08	-------+-----+----+---+-----	2.8
cg03764274	17	OXLD1	79.1249	14.74	50.2345 , 108.0153	7.96e-08	++-+--+++++--+++++-+-+++++-+	27.9
cg01970336	1	EPS15	-55.6507	10.3736	-75.983 , -35.3184	8.11e-08	------------+-+--+--+-------	61.8
cg07624815	3	FGD5	119.772	22.3292	76.0068 , 163.5373	8.14e-08	+--+++-++-++-++-++++--+++--+	35.7
cg08351131	17	HEXIM2	-60.6075	11.2993	-82.7542 , -38.4609	8.15e-08	-+-------++-++--------------	6.1
cg14105680	2	IL37	-48.4453	9.03262	-66.1493 , -30.7414	8.17e-08	-+-?++--+--+-++-------+-----	19.9
cg17036469	1	AMPD2	47.566	8.86914	30.1825 , 64.9495	8.18e-08	++-+?+++-?+++++++++++-++-+-+	0
cg26346621	12	MLF2	-54.3629	10.1376	-74.2325 , -34.4932	8.21e-08	+--+-+-----+---?------------	53.9
cg01982597	10	ERCC6	-104.527	19.4934	-142.7341 , -66.32	8.22e-08	----?---------+--+----+-----	27.9
cg03677056	17	SLFN12L	-59.4004	11.0773	-81.1119 , -37.6889	8.22e-08	--+----+----++-+------------	12
cg15446391	11	WT1	-51.1658	9.54218	-69.8685 , -32.4632	8.23e-08	---+-+-++---+--------+-----+	23.7
cg26280998	6	KLHL31	-65.0355	12.1311	-88.8126 , -41.2585	8.27e-08	---------------?-------++---	47.6
cg20176142	8	ZBTB10	-47.3908	8.8405	-64.7182 , -30.0634	8.29e-08	-----------+++++-++----+----	37.4
cg00780426	6	HIST1H3I	-53.1034	9.90902	-72.5251 , -33.6817	8.36e-08	---??---+---++------++---++-	26.1
cg10084993	16	SLC9A3R2	52.381	9.77498	33.222 , 71.54	8.38e-08	++++-++++++-+++-++++-+-+++++	28
cg11539055	4	ANTXR2	58.9221	10.9976	37.3668 , 80.4774	8.43e-08	+++++-++++++++-?+++++--+-+++	3
cg24334029	20	PHACTR3	-54.6999	10.2117	-74.7148 , -34.6851	8.48e-08	+---?----?-+--------+-------	62.6
cg01858866	1	PABPC4	67.4475	12.5919	42.7675 , 92.1276	8.49e-08	+-++++++-++-++++++++-+-+---+	1.3
cg22123711	1	TNFRSF8	-49.8695	9.31067	-68.1184 , -31.6206	8.5e-08	--+--------++-+--+---+------	43.7
cg20494635	11	MRPL23-AS1	68.9876	12.8816	43.7396 , 94.2356	8.53e-08	++--++-++++++++-++++-+++---+	33.8
cg21554670	17	GAS7	-51.3969	9.59709	-70.2072 , -32.5866	8.53e-08	------------+-++-++--++----+	45.6
cg01099825	9	NELFB	49.3207	9.21133	31.2665 , 67.3749	8.59e-08	++---+-+-+++-+-++++++-++++++	15.4
cg16101213	7	MIR129-1	-70.8167	13.2273	-96.7422 , -44.8913	8.61e-08	----?+--------+---+---+----+	32.4
cg04821520	11	C11orf74	-44.368	8.28985	-60.6161 , -28.1199	8.69e-08	-----++-------++--+---+---+-	5.7
cg04982834	1	EVI5	-52.2108	9.75792	-71.3363 , -33.0852	8.77e-08	-----+--+--+--+-----+-------	0
cg05099464	11	ARHGEF12	-51.2159	9.57359	-69.9801 , -32.4517	8.81e-08	----------+-+-+---?--+?-----	3.4
cg00549798	22	MKL1	47.8372	8.94421	30.3065 , 65.3678	8.87e-08	++++++++++++-+++++---+++++-+	18.5
cg25521481	6	TTBK1	-55.0669	10.2964	-75.2478 , -34.886	8.88e-08	--------+---+-+-------------	28
cg09063663	1	EPHA2	85.08	15.9101	53.8962 , 116.2638	8.92e-08	-++++-++++++-+++++++-++-+-++	54.1
cg07116631	16	TIGD7	-55.3728	10.3555	-75.6697 , -35.0759	8.93e-08	--+--------+-+--------+-----	32.4
cg03687532	16	FTO	-44.7473	8.36882	-61.1502 , -28.3444	8.95e-08	-+--++-----+--------+++-++-+	15.5
cg14987354	14	LINC00911	-84.2755	15.7652	-115.1754 , -53.3757	9.01e-08	-+--?---+?-+---+-----+------	0
cg13458609	9	ENG	-58.4678	10.9404	-79.9109 , -37.0247	9.08e-08	--+-----+---+----+---+-+----	28.6
cg02370100	21	ABCG1	87.246	16.33	55.2392 , 119.2529	9.16e-08	+-+++++++++++++?++++-+--++++	11.6
cg05343289	1	SELP	-67.9365	12.7189	-92.8655 , -43.0074	9.22e-08	--+-?-------+++------+-+----	30.6
cg06336535	19	FCHO1	63.9235	11.9724	40.4577 , 87.3894	9.33e-08	+++++-++-++-+++?+++++-++-+++	2.5
cg12127149	14	DYNC1H1	53.7085	10.0594	33.9921 , 73.4248	9.34e-08	+-++-+-+++++-++-+++++-+-+-++	42.2
cg13993914	9	NELFB	69.7427	13.0646	44.1361 , 95.3493	9.38e-08	++-+---++++--+-?++++-+++--++	44.3
cg16925459	7	HDAC9	-39.9091	7.47716	-54.5643 , -25.2539	9.43e-08	--------+------+-++---------	0
cg06898463	10	PBLD	-54.4276	10.1977	-74.415 , -34.4401	9.44e-08	--------------+------+------	43.7
cg04337944	22	FBLN1	67.8494	12.715	42.9281 , 92.7708	9.49e-08	++-+-++++++-+++++++++---++++	11.1
cg20635389	2	CPO	74.1442	13.8975	46.9051 , 101.3833	9.55e-08	-++?-+++-+++-++?++++--+++++-	23.5
cg18642369	13	DOCK9	-46.7458	8.76456	-63.9244 , -29.5673	9.63e-08	-+--++---------------+?---?-	15.2
cg08264519	14	BRF1	78.8775	14.7896	49.8899 , 107.8652	9.64e-08	++-+-+++-++-++-?++++++++++++	0
cg14994947	1	SLC30A7	-58.7526	11.0164	-80.3447 , -37.1605	9.65e-08	----+---+---+-++------------	0
cg07830855	6	DST	-66.5604	12.4863	-91.0337 , -42.0872	9.79e-08	--+-?------+--+--+--++------	16.8
cg07714085	2	PRKCE	-75.5686	14.1791	-103.3597 , -47.7776	9.84e-08	-----+------+----++---------	32.6
cg24024833	11	LSP1	74.7189	14.0239	47.2321 , 102.2058	9.93e-08	+-++++++-+++-++-++-+++++++-+	0
cg06462065	19	TMEM190	71.2467	13.374	45.0336 , 97.4598	9.97e-08	++-++--+++++-++++++++-++--++	19.4
cg21805788	1	FAM102B	-55.2097	10.3656	-75.5262 , -34.8932	1e-07	-----------++-+--+----+-++--	22.8
cg22202929	8	ZFPM2	-43.5662	8.17955	-59.5982 , -27.5343	1e-07	-++-----------+-----++------	0
cg04884025	1	ZFYVE9	-68.5727	12.879	-93.8155 , -43.3299	1.01e-07	-++-++-----++-+-----+++-----	22.2
cg07579839	4	MFSD10	136.893	25.706	86.5098 , 187.2772	1.01e-07	++-++++++++-+++?++++-+++++++	35.4
cg18062064	20	TLDC2	-87.4341	16.4231	-119.6233 , -55.2449	1.02e-07	---+++-+----+-+-------+-+---	4.3
cg09273716	20	SOGA1	-53.2477	10.0059	-72.8592 , -33.6362	1.03e-07	--+-++-----+--+------++-+---	14.8
cg05061471	11	CALCA	70.9073	13.3279	44.7846 , 97.0299	1.04e-07	+++++++++?+--++-++++++--++++	42.2
cg15661536	17	SEPT9	45.787	8.61169	28.9081 , 62.666	1.06e-07	+++?+++++++----?++-++++--+++	19.6
cg04111761	3	CCR3	-54.4101	10.244	-74.4884 , -34.3319	1.09e-07	----+---+-+-+-+--------+----	38.6
cg09365924	12	RARG	-66.0777	12.4429	-90.4658 , -41.6897	1.09e-07	----------+-+-----+--+--+---	21.3
cg19567594	11	MRVI1	73.9668	13.9251	46.6736 , 101.2601	1.09e-07	++-?+++++++-+++++++++-+-+-++	25.1
cg24911721	22	MIRLET7BHG	33.5035	6.31011	21.1357 , 45.8714	1.1e-07	+++?--+++++-+++?++-+++++---+	35.5
cg13033722	6	PTK7	69.2455	13.0469	43.6735 , 94.8174	1.11e-07	++-+++-+-+++-+-+++-++-++++++	0
cg00744431	10	PWWP2B	60.6831	11.4372	38.2662 , 83.1001	1.12e-07	++++++++-++-+++-++++++++++++	0
cg22570970	6	JARID2	50.6995	9.55562	31.9705 , 69.4285	1.12e-07	+++++++++-++++++++++++++--++	8.4
cg27164770	13	GPC6	-50.5735	9.53221	-69.2567 , -31.8904	1.12e-07	--+-----------+---+-+-+-----	0
cg01751245	2	SPRED2	-34.557	6.51942	-47.335 , -21.7789	1.15e-07	--++-------+--+--+----+-+--+	19.1
cg10499974	3	CCR3	-43.8904	8.28004	-60.1193 , -27.6615	1.15e-07	-----------+--+-----+----++-	23.1
cg01301319	7	HOXA3	53.9517	10.1814	33.9961 , 73.9072	1.16e-07	++++++++-++++---++-+++-+++++	27.3
cg23251798	1	DNASE2B	-57.9728	10.9384	-79.412 , -36.5336	1.16e-07	--+--------+++-+-+--+-+-----	8.9
cg27000831	17	CCL8	-66.7369	12.6051	-91.4428 , -42.031	1.19e-07	-+------------+?--+-+-+-+--+	18.6
cg00154986	15	MESP2	-63.7468	12.0429	-87.3509 , -40.1427	1.2e-07	---+-----------+--------+--+	38.2
cg01176433	15	DRAIC	-47.1776	8.91197	-64.6451 , -29.7101	1.2e-07	+----------+-+-?------+----+	49.2
cg09580592	17	ABR	43.9157	8.29703	27.6535 , 60.1778	1.2e-07	+++-++++++----++++-+-+++++-+	23.2
cg11669284	5	WDR70	-40.4191	7.63512	-55.384 , -25.4543	1.2e-07	-----+------+-----+--++-----	21
cg26182406	14	CDCA4	-56.6348	10.6973	-77.6016 , -35.6681	1.2e-07	----?++-------+------+--+---	28.1
cg06826457	12	CDKN1B	52.6656	9.95158	33.1605 , 72.1707	1.21e-07	++-++-++-++-+++-++++++-++--+	11.3
cg13527631	3	ECE2	-75.4471	14.2571	-103.3911 , -47.5031	1.21e-07	---?+------+----------------	0
cg19257111	15	HACD3	46.0252	8.6963	28.9805 , 63.07	1.21e-07	+--+?+-++++-++-++++++-?+++?+	0
cg24949488	10	DNTT	-61.9337	11.7025	-84.8707 , -38.9967	1.21e-07	--++-+-----+---?-+----------	46.6
cg25306480	10	PWWP2B	49.053	9.26902	30.8857 , 67.2202	1.21e-07	+-+-++++-++-++++++++++++++-+	6.6
cg01402255	1	GATAD2B	-50.593	9.5626	-69.3356 , -31.8503	1.22e-07	-+---++-----+-+-------------	12.5
cg11699125	1	ACOT7	-54.7921	10.3574	-75.0926 , -34.4915	1.22e-07	----++------+-+--+---+++----	28.5
cg25500001	10	ZNF438	-55.9751	10.5801	-76.7122 , -35.2381	1.22e-07	+-------------+-------------	30.5
cg27410601	17	TMC6	115.029	21.7419	72.4147 , 157.643	1.22e-07	++-+++-++++-+++?++++-++-++++	37.2
cg26314722	1	LINC01132	-78.0512	14.763	-106.9866 , -49.1158	1.24e-07	-+---------+--+-+-----+----+	46
cg16565528	8	DECR1	-61.0278	11.5448	-83.6556 , -38.4	1.25e-07	----?--++?+---+------------+	11.2
cg05257202	13	UBAC2	-72.3471	13.6905	-99.1805 , -45.5138	1.26e-07	--++-+-----++--?------+-----	25.8
cg19860160	1	C1orf159	-62.2842	11.7869	-85.3866 , -39.1818	1.26e-07	----?-------+--------+------	48.1
cg02470179	3	STT3B	-84.927	16.0759	-116.4358 , -53.4181	1.27e-07	------------++-+-----------+	17.1
cg13518366	19	NCR1	28.855	5.46161	18.1502 , 39.5598	1.27e-07	+-+-+++++?+-++++++++-+?+-+?+	39.5
cg26049998	17	PITPNC1	-52.3997	9.91939	-71.8417 , -32.9577	1.27e-07	-----+--------+?-+-----+----	43.2
cg17953300	11	SIPA1	72.4697	13.7201	45.5783 , 99.3611	1.28e-07	+++-+++++++-+++-++++-+++++-+	0
cg19631651	3	CACNA2D3	-66.1999	12.5342	-90.7668 , -41.633	1.28e-07	---+--------+--+-+--+-------	44.4
cg05981785	2	TET3	77.2856	14.638	48.5951 , 105.9761	1.29e-07	++++--++-+++++++++++-+-++--+	29.9
cg15893360	12	PXN	51.443	9.7422	32.3483 , 70.5377	1.29e-07	+--+?+-++?+++++-++-+-+++++-+	27.6
cg24859236	1	PIK3CD	56.0244	10.6129	35.223 , 76.8257	1.3e-07	+++--+++-++++++-++++---+++-+	29.7
cg02538248	16	ZNRF1	-44.5144	8.43649	-61.0499 , -27.9788	1.32e-07	---?--+-----+-++-+---+-----+	46
cg18758622	17	BAIAP2	47.7635	9.05292	30.0198 , 65.5073	1.32e-07	+++??+++-+++-+-?+++++++-++++	47.4
cg02438164	16	C16orf96	64.4822	12.2271	40.5171 , 88.4474	1.34e-07	+++++++-+++-++-+++++++++++++	0
cg07587796	4	ENPEP	-45.0049	8.53455	-61.7326 , -28.2772	1.34e-07	---?----+?----------+-+---+-	0
cg18625289	19	MBD3	62.6819	11.8862	39.3849 , 85.9789	1.34e-07	+++++-+++++-+++?++++-+-+---+	44.5
cg00024471	3	TPRG1	-65.5906	12.4427	-89.9784 , -41.2029	1.35e-07	-------+---+--+?-+----+-----	21.3
cg01787084	16	FBXO31	-35.0748	6.65363	-48.116 , -22.0337	1.35e-07	----?-----++------+---------	0
cg14160422	19	SLC44A2	56.9682	10.8047	35.791 , 78.1455	1.35e-07	+++??+++-++---++++-+----++-+	26.8
cg11887376	5	SLC12A7	-82.4591	15.6511	-113.1351 , -51.783	1.38e-07	-+---------++-+----+--------	0
cg22932427	1	YY1AP1	-49.1146	9.32284	-67.3874 , -30.8418	1.38e-07	----?---------+--++--++-----	4.2
cg02255107	3	OXNAD1	72.9858	13.8578	45.8244 , 100.1471	1.39e-07	++-+?+++-----++++++++-+++--+	26
cg03479289	11	KIAA1549L	-53.2426	10.1103	-73.0588 , -33.4264	1.39e-07	---?------++--+?-+------++-+	36.5
cg04387984	3	LPP	-57.8877	10.9945	-79.4369 , -36.3385	1.4e-07	-----------++--+-+----+----+	29.5
cg14502713	9	PNPLA7	84.1732	15.9883	52.8362 , 115.5103	1.4e-07	++-++--++++--+-+++++-+-+++--	28.6
cg15315773	18	TNFRSF11A	-106.091	20.1475	-145.5799 , -66.6017	1.4e-07	---++------+--+---+---+-----	39.5
cg16594273	16	CFAP20	-66.4935	12.6297	-91.2478 , -41.7392	1.4e-07	----?------+-----+--+---+-+-	13.4
cg18183961	4	RBM47	-64.2753	12.2083	-88.2035 , -40.3471	1.4e-07	------+----+----------------	22.2
cg18900669	17	SENP3-EIF4A1	84.1175	15.9747	52.8071 , 115.428	1.4e-07	+++-++++++++++++++++++-+-+++	0
cg26196626	8	SNTB1	-50.9891	9.68454	-69.9708 , -32.0074	1.4e-07	---??--+---++-+---+-+-------	19.5
cg26596307	16	CX3CL1	81.9727	15.5713	51.4529 , 112.4924	1.41e-07	++++-+++++++-++?++++--+-+-++	41.1
cg02605776	1	LRIF1	46.7744	8.88784	29.3543 , 64.1946	1.42e-07	+++++-++-+++-++-+++-++++++++	10.3
cg09522854	21	TRPM2	135.566	25.7593	85.0781 , 186.0546	1.42e-07	+++??+++++++-++++++-++++++++	6.4
cg10853949	17	SECTM1	-42.1486	8.01293	-57.8539 , -26.4432	1.44e-07	---+--------+--?---+---+----	17
cg25361506	1	PHLDA3	61.5775	11.7053	38.6352 , 84.5198	1.44e-07	+-++++++++++-++-++++-+-+-+++	17.8
cg02072495	15	ANXA2	-47.6459	9.05959	-65.4027 , -29.8891	1.45e-07	-----------++----++--+------	12.6
cg02504384	16	TSC2	72.1832	13.7294	45.2735 , 99.0929	1.46e-07	+-++++++++++-+++++++-+-++--+	57.5
cg27208169	17	RAI1	42.8752	8.15424	26.8929 , 58.8575	1.46e-07	+-++++++-++--++++++++--+---+	0
cg21631918	15	STRA6	66.2116	12.601	41.5137 , 90.9096	1.49e-07	+++++-++-++--+++++-+-++++-++	7.2
cg26130669	6	ADTRP	-66.5489	12.6706	-91.3833 , -41.7145	1.5e-07	+---+-+----++-+-------+-----	47.4
cg06477663	13	LCP1	-33.141	6.31284	-45.5142 , -20.7679	1.52e-07	--+?----+--+--+------+-----+	0
cg11887214	11	PYGM	79.6816	15.1771	49.9345 , 109.4287	1.52e-07	++++++++++++++-+++-+-+-+++-+	5.9
cg20071744	8	TRAPPC9	28.9655	5.5182	18.1498 , 39.7811	1.53e-07	+++-+-++++++-++-++-+++++++-+	26.1
cg06750897	1	PBX1	28.7598	5.48203	18.015 , 39.5046	1.55e-07	++++-+++++++++++++++++-+++++	46.5
cg09259081	16	TLDC1	32.4538	6.18694	20.3274 , 44.5802	1.56e-07	+++-+--+-++-+++?++++-+-++-++	53.9
cg12723011	4	FGFBP2	-99.4239	18.953	-136.5717 , -62.2761	1.56e-07	---+---+---++-----+-+-+----+	24.9
cg26132737	2	ANKRD44	46.276	8.82276	28.9834 , 63.5686	1.56e-07	++++--+++++-++-?++-+-++-++++	13.4
cg19925215	8	TPD52	50.3473	9.59966	31.5319 , 69.1626	1.57e-07	+++++-+++-+--++++++++---++++	1.6
cg26671988	5	PAM	-41.97	8.00364	-57.6571 , -26.2828	1.57e-07	-------------+-+---------+--	0
cg13187188	11	GPR152	-76.2179	14.5398	-104.7159 , -47.7199	1.59e-07	--+-------------------------	16.6
cg01135648	4	DCAF4L1	-56.703	10.8204	-77.911 , -35.495	1.6e-07	----?------+---------++-+-++	24
cg24129390	13	STARD13	-64.9688	12.398	-89.2689 , -40.6688	1.6e-07	--+-+---+--+--+?----+-----?-	9.1
cg26048923	8	TRAPPC9	57.6022	10.9947	36.0525 , 79.1519	1.61e-07	+-+++--++++++++-++++++++++++	0
cg00986580	14	DAD1	-47.7605	9.11727	-65.6304 , -29.8907	1.62e-07	-------++--+---+------+-+---	20.3
cg03105348	10	DRGX	-49.1947	9.39023	-67.5996 , -30.7899	1.62e-07	---++-+-----------+-+-----++	0
cg08277369	16	TLDC1	29.0551	5.54682	18.1833 , 39.9269	1.62e-07	+++-+----++++++-++++---++-++	21.8
cg09072230	11	PLEKHA7	-68.0241	12.9843	-93.4734 , -42.5749	1.62e-07	-+-+-+-----+--+--+--++------	31.6
cg27646484	16	PYCARD	68.7642	13.1271	43.0351 , 94.4934	1.62e-07	+++-++++-++--++?++-+-+-++--+	55.6
cg15829665	6	PNLDC1	27.6346	5.27693	17.2919 , 37.9774	1.63e-07	++-+++++++++++-+++-+-+++-+++	17.2
cg11385906	8	INTS9	-57.0772	10.8995	-78.4401 , -35.7142	1.64e-07	---+?+------+-++-+--+-------	31.5
cg15908709	17	HOXB-AS3	60.8721	11.6312	38.075 , 83.6693	1.66e-07	++++++++++++++++++++++---+++	35.8
cg16548961	5	DOK3	-38.0047	7.26148	-52.2372 , -23.7722	1.66e-07	----?-+----++---------------	0
cg04185862	16	TIGD7	-55.4498	10.5959	-76.2177 , -34.6818	1.67e-07	--+-+------+-+--------+-+---	14.7
cg00835857	8	SPATC1	-79.1702	15.1337	-108.8323 , -49.5081	1.68e-07	+--------+-+-+--------+----+	21.6
cg14114043	6	LOC154449	41.824	7.99436	26.1551 , 57.493	1.68e-07	+++++++++-++-+--++++-+++--++	24.8
cg02928345	1	NVL	-54.0941	10.3412	-74.3628 , -33.8254	1.69e-07	---------------------++---+-	0
cg13985198	1	RPS8	120.356	23.0141	75.2485 , 165.4638	1.7e-07	+++--+++-++++++++++-+--+--++	15.2
cg00139681	7	CCDC71L	-51.0216	9.76005	-70.1513 , -31.8919	1.72e-07	---------------+----+-------	0
cg13859589	9	KDM4C	-77.6871	14.8642	-106.8209 , -48.5533	1.73e-07	---+?----?-----------+------	0
cg18222865	11	PSMA1	61.3127	11.7306	38.3207 , 84.3046	1.73e-07	-+-+++++++++-+++++++--+++-++	5.4
cg20493718	17	CSNK1D	62.9198	12.0429	39.3157 , 86.5239	1.75e-07	+++-+-+-++++-+++++-+++-+-+++	20.6
cg22319147	16	CDH5	55.696	10.6606	34.8012 , 76.5908	1.75e-07	+++++-+++++++++--+++++++---+	54
cg11704490	2	TBR1	-34.6989	6.64321	-47.7196 , -21.6782	1.76e-07	---+-+--+---+-------+++-++--	8.4
cg21526019	19	FCHO1	68.1099	13.0413	42.5489 , 93.671	1.76e-07	+++++-+++++-+++?++-+++++-+++	24.7
cg23690893	19	TECR	51.5357	9.8678	32.1948 , 70.8766	1.76e-07	+-+-+-+++++-++++++++-+-+++++	29.1
cg13866190	8	BIN3	82.5254	15.8046	51.5483 , 113.5024	1.77e-07	+++??-+++-++-+++++++-+-++--+	2.4
cg27196158	11	MRPL23-AS1	69.9231	13.3914	43.6759 , 96.1703	1.78e-07	+++++-+++++--++?++++++++-+-+	39.1
cg04481096	7	HOXA2	91.1215	17.4559	56.908 , 125.335	1.79e-07	++++--+++?++++++++-+-------+	23.6
cg02483701	7	HOXA10-HOXA9	68.1787	13.066	42.5693 , 93.7881	1.81e-07	+-+++++-++++++++++-+++--++-+	39.1
cg20057782	10	ARMC4	-48.2538	9.24705	-66.378 , -30.1296	1.81e-07	+--?-------++-+-----+-------	51.9
cg04510459	1	CDC7	-62.4137	11.9635	-85.8621 , -38.9653	1.82e-07	-+----+----+-----+----+----+	36.7
cg13397818	9	DNAI1	-106.306	20.3775	-146.246 , -66.3662	1.82e-07	---+----+--+----------------	28.3
cg12970757	12	SLC2A14	23.5084	4.50803	14.6727 , 32.3441	1.84e-07	+-++?+++-?+-++-++++--+++++++	32.9
cg26840970	16	ZNF19	-38.531	7.38917	-53.0138 , -24.0482	1.84e-07	------------+-------++++----	54.5
cg18259535	11	RIN1	71.8509	13.7799	44.8422 , 98.8596	1.85e-07	++++-++++++-+++?++++-+-+++-+	36.9
cg24791188	19	FCHO1	56.5447	10.8458	35.2869 , 77.8025	1.85e-07	+++++++++++++++-++-+++++-+-+	15.6
cg21747070	5	LOC100506688	77.36	14.8433	48.267 , 106.4529	1.87e-07	+-+++++++-+++++-++++++-+++-+	0
cg19325791	17	HOXB1	46.8787	8.9972	29.2442 , 64.5132	1.89e-07	+++--+++++++-++-++-+-+-++-++	57
cg19715167	10	ENTPD1-AS1	-92.9789	17.8486	-127.9621 , -57.9957	1.9e-07	--+--------+-+-+--+-+-------	0
cg23164076	6	EEF1E1-BLOC1S5	-64.2278	12.3298	-88.3942 , -40.0615	1.9e-07	----+-+------+------++-+----	5.8
cg02227813	6	SAMD3	-43.6505	8.38153	-60.0783 , -27.2227	1.91e-07	-----+-+------------+-+----+	0
cg01543603	16	ANKRD11	92.9358	17.8565	57.937 , 127.9346	1.94e-07	++++++-+++++-++++-+++-++++++	16.3
cg03399783	3	EOGT	-84.8186	16.2982	-116.7631 , -52.8741	1.95e-07	----+---+-+-+-----+---+---+-	3.2
cg06311422	6	DST	-58.6469	11.2723	-80.7407 , -36.5532	1.96e-07	+--------+-++-++-+--+-------	37.5
cg15822394	19	FCHO1	60.6262	11.6521	37.7881 , 83.4644	1.96e-07	+++++++++++--+-?++-++-++-+++	29.7
cg24108508	1	FAM20B	-50.7037	9.74535	-69.8046 , -31.6028	1.96e-07	------------+-++-+--++------	31.9
cg01120953	5	CAMK2A	54.2041	10.4203	33.7803 , 74.6278	1.97e-07	+++++++++++--+++++++--++++++	33.6
cg27200630	3	PIK3CB	-52.2525	10.0437	-71.9383 , -32.5668	1.97e-07	-----------++-------+-------	0
cg01979157	1	SKI	64.9421	12.4862	40.4692 , 89.415	1.98e-07	+++-+++++++++++-+++++----++-	2.6
cg13112511	5	PDE4D	74.181	14.2647	46.2221 , 102.1398	1.99e-07	+++++++++++--++?-++?--++++++	48.2
cg25636466	6	TDRD6	-38.1605	7.33929	-52.5456 , -23.7755	2e-07	----?--?----+-+?--+---+---?-	3.5
cg01555705	16	CX3CL1	-101.383	19.5009	-139.6047 , -63.1611	2.01e-07	--------++---+------+-+-+-+-	0
cg06208382	12	PPM1H	-60.4917	11.6355	-83.2973 , -37.6862	2.01e-07	----?+----------------+-----	19.1
cg10333023	11	KCNJ5	35.2048	6.77263	21.9304 , 48.4792	2.01e-07	++++--+++++++++-+-+++-+++-+-	0
cg22608646	17	DNAH17	-75.2723	14.4816	-103.6563 , -46.8883	2.02e-07	----+----+--+-+-----++------	15.6
cg17713673	12	SCAF11	-46.8957	9.02912	-64.5928 , -29.1986	2.06e-07	-------------++?-+----------	34.8
cg01704534	4	RBM47	-57.9155	11.1534	-79.7761 , -36.0549	2.07e-07	------------+-+--+----------	0
cg06287775	7	FOXK1	41.8704	8.06318	26.0666 , 57.6743	2.07e-07	+-++?+-++++--+--++-++-+++-?+	0
cg13131501	1	NBPF20	77.0465	14.8364	47.9671 , 106.1259	2.07e-07	++-+++++-++++++-+++++--++-++	39.4
cg15975427	3	FGD5	-81.4233	15.6825	-112.161 , -50.6857	2.08e-07	---??--+-?--+-+--++--+-----+	54.3
cg01528492	8	TMEM64	-39.2213	7.556	-54.031 , -24.4115	2.1e-07	----+------+--+------+-----+	51.4
cg08743751	5	MAST4	54.2747	10.4566	33.7797 , 74.7697	2.1e-07	++--++-+-++++++-+++++-+-+-++	5.9
cg13812230	12	MBD6	46.5408	8.96624	28.967 , 64.1146	2.1e-07	++-++++++++++---++-+-+-++-++	0
cg17942763	1	SKI	71.4569	13.7684	44.4708 , 98.4431	2.1e-07	+++++-++++++-++++++++--+++-+	7.4
cg06013494	17	CD300LB	-46.0568	8.87488	-63.4516 , -28.6621	2.11e-07	----?------------+--+--+----	0
cg08273750	11	MRPL23-AS1	66.4883	12.8115	41.3777 , 91.5988	2.11e-07	+-+++-++++++-+++++-+-+--++-+	42.6
cg26601310	11	PRR5L	-50.4299	9.72801	-69.4968 , -31.363	2.17e-07	---+-+--------++--+-----+---	32.6
cg04677123	5	ADGRV1	-42.1065	8.12307	-58.0277 , -26.1853	2.18e-07	----+-------+-++--++--------	43.2
cg03318904	22	TAB1	60.9423	11.7615	37.8897 , 83.9949	2.2e-07	-+++++-++++--+--++++-+++++-+	40.8
cg20917077	7	CPA5	53.5167	10.3281	33.2737 , 73.7598	2.2e-07	+++?+-+++++-++++++-+++-+++++	0
cg22437987	17	P2RX1	-85.1829	16.4422	-117.4096 , -52.9561	2.21e-07	-------+----++------+------+	0
cg00298065	19	ZNF274	-60.2095	11.6261	-82.9968 , -37.4223	2.23e-07	+--+-+------+--?-----++-++--	22.9
cg05302350	4	MAML3	65.8403	12.7193	40.9104 , 90.7701	2.26e-07	+++?+++++++++++-+++++--++--+	0
cg12847013	3	IQCJ-SCHIP1	-48.3066	9.33286	-66.599 , -30.0142	2.27e-07	---??------+--+?----+-------	53
cg13078421	19	GNG7	47.9246	9.25896	29.777 , 66.0722	2.27e-07	+---++-++++--+-?++++-+-+-+++	48.8
cg15012027	2	MGAT4A	-45.0083	8.698	-62.0564 , -27.9603	2.28e-07	---??----------++----+------	0
cg23371436	11	NAV2	-51.7429	10.0008	-71.3445 , -32.1413	2.29e-07	---+---+------++----------+-	26.4
cg08719380	2	CACNB4	61.0279	11.7968	37.9061 , 84.1496	2.3e-07	++++++-+++++-+-?++-++-+-++++	26.5
cg18765542	11	DGKZ	-88.1912	17.0495	-121.6083 , -54.7741	2.31e-07	-+-++--+-------+--+-+-------	40.1
cg12889594	11	MYEOV	-63.0462	12.1952	-86.9489 , -39.1436	2.34e-07	--++?++----++----++---+----+	41.2
cg01014262	16	N4BP1	-55.0795	10.6547	-75.9626 , -34.1963	2.35e-07	--+-+-----+-+-------+-------	0
cg16988970	17	ASB16	66.8062	12.926	41.4712 , 92.1413	2.36e-07	+-+++-++++++-+-?+++++-++++++	29
cg18663307	21	ITGB2	51.4532	9.95769	31.9361 , 70.9703	2.38e-07	+++-++++++++-++-++-+++--++++	0
cg27629753	6	CD83	100.888	19.5243	62.6203 , 139.1556	2.38e-07	+-+?-+-+++++++++++++-+-+++++	0.1
cg04641860	10	HNRNPF	38.4713	7.44844	23.8724 , 53.0703	2.4e-07	+++++++++++++++?++++++--+--+	8.4
cg13662569	4	SORBS2	44.5021	8.61812	27.6106 , 61.3936	2.42e-07	++++++++++--+++-+++++-+++-++	0
cg25557739	14	LOC100129345	-75.7015	14.6618	-104.4388 , -46.9643	2.43e-07	-------+---++-+---+---------	0
cg18642234	3	GPX1	65.2107	12.632	40.4519 , 89.9696	2.44e-07	+++-+++++++-+++?++++++---+-+	41.3
cg02973307	19	KCTD15	41.0324	7.94948	25.4515 , 56.6134	2.45e-07	++-?++++++++-+++++-++--+-+++	14.4
cg24018814	12	GOLGA3	47.163	9.1415	29.2456 , 65.0803	2.48e-07	+++++++++++--+--+++++++++-+-	31
cg18038207	12	OTOGL	-104.559	20.2697	-144.2882 , -64.8308	2.49e-07	---+-------+--+?--+---+---++	0
cg06639585	6	PNPLA1	-57.0495	11.0625	-78.732 , -35.3671	2.51e-07	---+---+------+---+---+----+	35.1
cg09569850	2	SERTAD2	-42.2645	8.19655	-58.3298 , -26.1993	2.52e-07	--------+---+-++-+--+-+-----	1.1
cg09071093	12	GLI1	-52.8836	10.2607	-72.9946 , -32.7726	2.55e-07	--------------+-------+-----	0
cg12061886	14	FOS	66.1271	12.8299	40.9805 , 91.2738	2.55e-07	++-+++++++++-+-?+++++----+++	0
cg18482892	3	ARHGEF3	-39.2205	7.60967	-54.1354 , -24.3055	2.55e-07	---?---+---++--?----+-------	40.2
cg09996284	1	PMF1-BGLAP	70.7444	13.7279	43.8377 , 97.6511	2.56e-07	++-?+-+++-++++++++++-++++-++	23.9
cg08202399	16	MKL2	86.3024	16.749	53.4744 , 119.1304	2.57e-07	++++++++++++++++++-+++--++++	19.4
cg06892907	8	AZIN1	-62.3635	12.1096	-86.0982 , -38.6288	2.61e-07	----++--------+------+--+--+	49.6
cg19786121	19	MAP4K1	-61.3704	11.917	-84.7278 , -38.0131	2.61e-07	--+-----------------+++-----	53
cg01894508	2	ASPRV1	52.6109	10.2322	32.5557 , 72.666	2.72e-07	+++++-++++++-+-++++++-+-++++	20.4
cg03222044	1	SLAMF9	-59.8183	11.6368	-82.6264 , -37.0102	2.74e-07	----+----+-++-----+-+-------	38.5
cg24000908	5	SLC12A7	-73.1381	14.2268	-101.0227 , -45.2536	2.74e-07	--------------+---+--+--+--+	12.3
cg20385395	5	MATR3	-39.354	7.65776	-54.3632 , -24.3448	2.76e-07	------------+-+?------+-----	55.3
cg20405742	6	STMND1	-43.9276	8.54837	-60.6824 , -27.1728	2.77e-07	-----+------+-+-----+-+-----	39.9
cg20259814	15	MAPK6	-65.9555	12.8382	-91.1184 , -40.7925	2.79e-07	----+-----+---+-------------	36.8
cg10276834	7	CHRM2	34.9498	6.80404	21.6139 , 48.2857	2.8e-07	++++++++++++-++?++++++-+++++	0
cg06583577	5	SEMA6A	-48.2294	9.39082	-66.6354 , -29.8234	2.81e-07	---?----+-----+?------+-----	5
cg14027204	1	PTGFRN	55.0123	10.7134	34.0141 , 76.0105	2.82e-07	+++++++++++---++++-+-++++--+	38.8
cg09435499	11	FLJ42102	-48.9702	9.53764	-67.664 , -30.2764	2.83e-07	----?---------+?-----+------	6.6
cg14865868	2	TRIB2	-71.0774	13.8431	-98.2099 , -43.9448	2.83e-07	---+-------++--+-----+------	37.3
cg26165081	11	PSMA1	-59.1814	11.5321	-81.7842 , -36.5785	2.87e-07	----++-----+--+?--+--------+	40.9
cg00186909	12	PLEKHG7	-39.5308	7.70748	-54.6375 , -24.4242	2.92e-07	-----------+--+?------------	25.3
cg07018107	8	MIR1208	-41.7097	8.13697	-57.6581 , -25.7612	2.96e-07	-----------+++-?-------+--+-	0
cg07631309	10	GSTO1	-51.321	10.0121	-70.9447 , -31.6973	2.96e-07	-----+--------+--++---+----+	31.8
cg10059056	11	DGKZ	83.9874	16.3862	51.8706 , 116.1043	2.97e-07	++-++-+++++--+++++++-++--+++	32.1
cg05422796	18	ZBTB14	-37.0892	7.23765	-51.275 , -22.9034	2.98e-07	----+------+--------+-+-----	31.2
cg15659420	11	NAV2	-38.1201	7.44091	-52.7043 , -23.536	3.01e-07	--+----++------?--+---+-----	43.2
cg19631472	11	LDHA	65.5695	12.7992	40.4832 , 90.6559	3.01e-07	-+-?++++-++++++-++++-++-+--+	25.9
cg22672060	4	GUCY1A3	-43.462	8.48629	-60.0952 , -26.8289	3.03e-07	--+--------++-+?-----+-+----	38.7
cg10980495	11	MOB2	33.4997	6.5415	20.6784 , 46.3211	3.04e-07	-++++-++++++-+-+++-++--+++++	24.2
cg23304298	14	MIR4708	-45.0223	8.792	-62.2546 , -27.79	3.04e-07	---??----?+---++--+-+-+-----	51.4
cg15099418	3	IGSF11	-40.8824	7.98895	-56.5408 , -25.2241	3.1e-07	--+?-------+--+--+--+----+--	50.7
cg20038219	7	CLDN4	-41.0183	8.0173	-56.7322 , -25.3044	3.12e-07	-+--+---+-+---+?----+-?+--?-	18.8
cg27470978	8	TACC1	-71.0289	13.8835	-98.2405 , -43.8173	3.12e-07	-++--------+-+++-----++-++--	3.1
cg07651540	18	PCAT18	-53.3566	10.431	-73.8013 , -32.9119	3.13e-07	----++--------+------++-----	59.2
cg03190891	10	SORBS1	-48.9546	9.57294	-67.7175 , -30.1916	3.16e-07	----?+-+----+----+----+-----	44.6
cg16679543	6	ZDHHC14	-43.5089	8.50875	-60.186 , -26.8317	3.16e-07	-+--++-----+---------++-----	11.6
cg00302083	8	ST3GAL1	-58.5656	11.4561	-81.0196 , -36.1116	3.19e-07	+-+-+----------?-----+---+--	32
cg13708645	12	KDM2B	46.3212	9.06572	28.5523 , 64.09	3.23e-07	++-++++++++++++?+++++-+++-++	0
cg00533827	2	ST3GAL5	-60.3486	11.8125	-83.501 , -37.1961	3.24e-07	-+--++-------+-?------+-+---	18.7
cg07504763	1	PTPRC	-49.5553	9.70214	-68.5715 , -30.5391	3.26e-07	----+------+--+?------------	3.8
cg15445722	14	FAM71D	-39.9386	7.81896	-55.2638 , -24.6134	3.26e-07	--++-+-----+------+-----++--	2.3
cg12604031	3	PDIA5	-84.4118	16.5297	-116.8101 , -52.0135	3.28e-07	-+---------+------+-++------	0
cg15247245	3	EPHA6	-46.2514	9.05712	-64.0033 , -28.4994	3.28e-07	--+--------++----+--+-------	0
cg17520027	1	NR5A2	49.3232	9.66299	30.3837 , 68.2627	3.32e-07	+--+-+++-++++++++++++-+++-++	14
cg27058497	1	RUNX3	45.0176	8.82083	27.7288 , 62.3065	3.33e-07	-++++--+++++---++++++++++-++	0
cg06871213	16	CIITA	-58.8764	11.5413	-81.4972 , -36.2555	3.37e-07	---+-----------+------+-----	0
cg21171204	9	C9orf170	41.91	8.21488	25.8089 , 58.0112	3.37e-07	++++-++++++++++-++++-+-++-++	0
cg09042411	7	LRCH4	59.8606	11.737	36.8562 , 82.8651	3.39e-07	++-+-+++++++++-?++-++++++-++	0
cg02637282	12	SLC9A7P1	-44.0989	8.64774	-61.0485 , -27.1494	3.41e-07	---+?+-----+---?-++---------	46.9
cg22858169	7	SMO	-80.0794	15.7053	-110.8618 , -49.2969	3.42e-07	---+?+------+--------+--+--+	49.6
cg06909469	2	ITPRIPL1	118.962	23.3334	73.2282 , 164.6951	3.43e-07	---++-++++++++--++++-+++++++	19.7
cg13120986	12	C1S	46.2411	9.07018	28.4636 , 64.0187	3.43e-07	+++-+++++++-+++?++++-+-+++++	40.2
cg06474225	10	HTRA1	-37.794	7.41639	-52.3301 , -23.2578	3.47e-07	-----+---+--+-------+------+	13.6
cg19805238	19	FCGBP	-55.7853	10.9475	-77.2423 , -34.3283	3.47e-07	---??-+----+--+-----+-+----+	47.1
cg06789500	7	MAD1L1	49.3186	9.67914	30.3475 , 68.2897	3.48e-07	++-++-+++?+-++-+++-+-+++++-+	12.1
cg23556108	2	BCL11A	153.347	30.096	94.3584 , 212.3348	3.48e-07	+-+++-++++++++++++-+-+-+++-+	14.7
cg01174811	5	PDE4D	60.8322	11.9432	37.4235 , 84.2408	3.52e-07	+++?+++-+++-+++?-++?-++-++++	41.2
cg19640821	19	LRRC25	-63.2572	12.4232	-87.6067 , -38.9077	3.55e-07	-++----------+------++-----+	0
cg18350391	16	IL32	53.5027	10.5087	32.9057 , 74.0997	3.56e-07	+++?--+++++++-+-++++---+++-+	49.9
cg08608126	11	CD59	-59.5128	11.6912	-82.4275 , -36.5981	3.57e-07	-----+-------++---+---+-----	39.1
cg12134349	8	SLC45A4	39.048	7.6715	24.0118 , 54.0841	3.58e-07	+++++++++++-++++++-++++-++++	0
cg13921420	13	USP12	-58.3472	11.468	-80.8245 , -35.8698	3.62e-07	-----+---------------+--+---	25.3
cg09516200	17	RPTOR	-53.6063	10.5442	-74.2729 , -32.9396	3.7e-07	--++-------+------+---+-+---	16.4
cg11482879	17	SMTNL2	31.0817	6.11375	19.0987 , 43.0646	3.7e-07	+-+++++++-++-+-?++-+++++-+++	7.8
cg17313709	14	DAD1	-41.8242	8.22781	-57.9507 , -25.6977	3.71e-07	-----------++-+?-++---+-----	45.2
cg18352516	3	LINC00578	-50.4979	9.9354	-69.9713 , -31.0246	3.72e-07	-----------+---?------+-----	0.6
cg06518251	11	ALDH3B1	-72.2261	14.2111	-100.0799 , -44.3723	3.73e-07	-----------+---?-++--------+	21
cg24764861	16	CLCN7	46.9537	9.23839	28.8465 , 65.0609	3.73e-07	++----++++++-++-++++-++-++--	25.3
cg16331674	22	MN1	43.4523	8.5518	26.6908 , 60.2138	3.75e-07	+++++++++++--+-?++-++-+++-++	0
cg25749254	10	KLF6	60.5758	11.9225	37.2076 , 83.9439	3.76e-07	++++++++++++---+++-+--++++--	9.8
cg22507756	1	KAZN	-36.1992	7.12514	-50.1645 , -22.2339	3.77e-07	--+--++-+---+-+--+---+----+-	17.4
cg24679007	1	RGS13	-53.489	10.5312	-74.1302 , -32.8478	3.79e-07	-+-++------+------+---+-----	34.9
cg00080333	4	ING2	-94.1447	18.5362	-130.4756 , -57.8137	3.8e-07	----++--------+---+---+----+	0
cg07061298	7	HOXA3	38.7141	7.62341	23.7722 , 53.656	3.81e-07	++++++++++++++--++-+++-+++-+	19.2
cg03693105	7	WDR86-AS1	-76.564	15.0776	-106.1161 , -47.0118	3.82e-07	+--++--+------+?------+--+--	49
cg12081946	13	IL17D	-29.562	5.82174	-40.9726 , -18.1514	3.82e-07	-------+----+----+-+----+-+-	12.4
cg22548485	6	TULP1	-53.4125	10.5189	-74.0295 , -32.7955	3.82e-07	----------------------+-----	44.5
cg06048750	10	KLF6	63.306	12.47	38.8648 , 87.7472	3.84e-07	++-++++++++++---++-++-++++-+	28.6
cg11144555	5	MAT2B	-35.9019	7.07203	-49.763 , -22.0407	3.84e-07	---+-----------+----+-+-----	11.2
cg17133774	1	CHD5	-45.0732	8.88023	-62.4784 , -27.6679	3.86e-07	----------+++-+--++----+---+	58.7
cg20146241	1	RCAN3	41.545	8.18591	25.5006 , 57.5893	3.87e-07	++-++++++++--++++++++-++++++	0
cg04638655	14	MIR541	-44.4904	8.76728	-61.6743 , -27.3066	3.88e-07	---??+--------------+-+---+-	32
cg07243548	1	VAV3	-54.0692	10.657	-74.9568 , -33.1815	3.9e-07	-----+------+-+---+---++----	34
cg15490335	1	CASZ1	72.4221	14.2767	44.4397 , 100.4045	3.92e-07	++-++++++++-+++-+++++++-++-+	39.1
cg17419597	1	PMF1-BGLAP	86.7497	17.1062	53.2216 , 120.2777	3.95e-07	+--++-+++-++++++++++---+++++	32.8
cg18132363	6	LINC00473	37.6442	7.42341	23.0944 , 52.1941	3.96e-07	++++-++++++-+++-+++++--++-++	0
cg01213231	12	ITGA5	-82.626	16.3008	-114.5756 , -50.6764	4e-07	--------------+?-+------+---	17
cg11737831	19	WDR18	-100.803	19.8883	-139.7837 , -61.8214	4.01e-07	----+-+--------------+-+----	0
cg20125920	10	SKIDA1	36.5715	7.21571	22.4287 , 50.7143	4.01e-07	++-?++++--+++++?+++++-++-+++	33
cg12654519	4	ARHGAP10	-42.835	8.45322	-59.4034 , -26.2667	4.04e-07	----?-------++---+---------+	14.1
cg00374492	6	CCND3	98.5831	19.4586	60.4441 , 136.722	4.06e-07	-++++++++++++--+++++++-++--+	0
cg00867472	1	HDGF	74.5437	14.7139	45.7045 , 103.3829	4.06e-07	--++-++-++++++--++++++++++-+	27.2
cg11803771	11	SIPA1	62.444	12.3302	38.2768 , 86.6113	4.1e-07	++--++++++++-++-++++++++++++	2.6
cg16343616	6	HMGN3	-90.2539	17.824	-125.189 , -55.3189	4.11e-07	--+?-+-----++-++----+-------	44.2
cg22972519	17	TRPV3	-75.4738	14.9054	-104.6883 , -46.2592	4.12e-07	++-++------++--------+--+---	25.7
cg09477895	3	LOC339862	-68.551	13.5418	-95.093 , -42.009	4.15e-07	-++--+--------+-----+-+-+--+	6.3
cg03701795	1	CD1E	66.9779	13.2342	41.0389 , 92.917	4.17e-07	+++++-+++++--++?+++++-+---++	5.1
cg00151922	20	JAG1	-80.6114	15.9293	-111.8328 , -49.39	4.18e-07	----------+---+--++---+-----	14.5
cg07298299	11	LARGE2	41.5881	8.21999	25.4769 , 57.6992	4.21e-07	++-+?--+++++++++++-+++++++-+	18.8
cg23681745	2	CFLAR	42.1244	8.33048	25.7967 , 58.4522	4.27e-07	++++?+++++++-++++++++-+++-++	13
cg00718400	3	CMTM7	-38.7985	7.67454	-53.8406 , -23.7564	4.29e-07	-+-?-----------?------+----+	33.4
cg26546155	16	RSPRY1	-49.4695	9.78717	-68.6523 , -30.2866	4.32e-07	-----+------------+--++-+--+	36.7
cg04276938	5	PRKAA1	-54.369	10.7617	-75.4619 , -33.2761	4.37e-07	--+-?-------+--?---+--------	0
cg12937580	14	CCDC88C	65.2401	12.9176	39.9216 , 90.5587	4.41e-07	++-++++++++-++-+++-+++++++-+	40.9
cg23098018	1	PIK3CD	60.5585	11.9917	37.0547 , 84.0623	4.42e-07	+++++-++++++-+-+++-+-+-+++++	16.2
cg18290775	14	PLEKHD1	49.2874	9.76131	30.1553 , 68.4196	4.44e-07	+++++-++++++-++?++-+++++-+++	0
cg27315555	5	ARHGAP26	-79.3728	15.7211	-110.1861 , -48.5595	4.45e-07	-----------+-------+--------	0
cg07126783	17	RPTOR	-47.202	9.35387	-65.5356 , -28.8684	4.51e-07	--+--+---------?--+--++-+-++	31.4
cg03635073	11	PRMT3	-41.681	8.26104	-57.8726 , -25.4893	4.52e-07	---++-------+++--------+----	0
cg09560549	16	SPG7	59.225	11.7374	36.2197 , 82.2303	4.52e-07	++-+++++-++-+++-++-+-++++--+	27.7
cg19831077	7	WDR86-AS1	-56.4332	11.1874	-78.3606 , -34.5058	4.55e-07	---+---+------------+++--+-+	12.4
cg20763327	5	MYO10	-55.274	10.9579	-76.7514 , -33.7966	4.55e-07	--+------------+-+--+--+---+	28.4
cg23361265	17	TTC19	-56.3623	11.1729	-78.2611 , -34.4635	4.55e-07	-----+-?-+-???+---+---+-----	0
cg16460860	17	TOM1L2	-50.7212	10.0632	-70.4451 , -30.9974	4.65e-07	----------+--++---+---+-----	25.7
cg12669088	12	LMNTD1	-67.0192	13.2997	-93.0866 , -40.9517	4.68e-07	--++-+--+-----+?------+-----	23.7
cg21824343	17	WDR81	-54.8356	10.8821	-76.1645 , -33.5067	4.68e-07	----+-------+--+-+-+---+----	18.4
cg22631818	13	RASA3	51.1116	10.1456	31.2261 , 70.997	4.71e-07	++++-+++++++-+++++++-+--++-+	0
cg04228042	12	ART4	-68.6651	13.632	-95.3838 , -41.9464	4.73e-07	--++--------+--?----+--+----	46.7
cg04276669	4	RBPJ	-53.3338	10.5888	-74.0878 , -32.5797	4.73e-07	-+-?-------+++---+----------	8.9
cg07466788	17	SLC16A3	88.8475	17.6385	54.2761 , 123.4189	4.73e-07	-+-++-+++++--+++++++++-+++-+	29.3
cg08702344	7	CLDN12	-37.6963	7.48369	-52.3644 , -23.0283	4.73e-07	---??---++-----?--+---?----+	39.1
cg01824466	8	TP53INP1	-38.7032	7.68417	-53.7642 , -23.6423	4.74e-07	-----+----+------++---+-----	17.4
cg09748975	4	MSX1	32.1312	6.38182	19.6228 , 44.6396	4.78e-07	+--+++++++-++++-+++++-++-+++	19.7
cg00111823	22	SLC16A8	-88.5671	17.5931	-123.0495 , -54.0846	4.8e-07	--+----+-------+-+----------	22.7
cg09578155	11	LRP5	73.9875	14.7023	45.171 , 102.8041	4.85e-07	++-?++++++++++++++++-+-+++-+	0
cg00152259	17	DHRS11	111.667	22.1944	68.1662 , 155.1681	4.87e-07	++-+--+++-+--+++++++-+-++--+	23
cg07240557	12	STK38L	48.5363	9.64699	29.6282 , 67.4444	4.87e-07	+---+++++++-++-++++++++-++-+	37.3
cg10648960	7	TTYH3	46.4566	9.23412	28.3577 , 64.5555	4.88e-07	-++++-+++++-++++++++++-+-+-+	62.7
cg23149881	2	IL1B	-46.0766	9.15821	-64.0267 , -28.1265	4.88e-07	-------------+-+-+--+-++----	41.8
cg00525011	16	RHBDF1	50.7617	10.0909	30.9834 , 70.54	4.89e-07	-+++++++-++++++?++++---+++-+	33.8
cg18941322	6	LY86	-38.5156	7.65735	-53.524 , -23.5072	4.91e-07	--------------+--+---++-+-?-	33.4
cg10216414	2	CNOT11	-51.7138	10.2835	-71.8694 , -31.5583	4.94e-07	+---?----+----------+----+--	0
cg07372034	22	MIR3201	-37.9346	7.54485	-52.7225 , -23.1467	4.96e-07	------------+-+?-+---+------	41.5
cg25793587	15	SMAD3	-70.0512	13.9373	-97.3683 , -42.7341	5e-07	---??------+--+------+------	26.5
cg21931656	11	ARAP1	-118.396	23.5562	-164.566 , -72.2258	5.01e-07	---+?--+---+--+-------+---+-	0
cg12458003	1	NFASC	53.2558	10.5991	32.4815 , 74.0301	5.05e-07	++-++-+++++--+--++++-+++++++	38.8
cg09445967	11	ZP1	63.3894	12.6194	38.6555 , 88.1233	5.08e-07	+++++++++++-++++++++++-+++-+	17.1
cg11772020	6	VEGFA	60.6298	12.0715	36.9696 , 84.2899	5.1e-07	++-??++++++-+++?++++++--++++	42.7
cg16588649	19	NFIC	83.3539	16.5986	50.8206 , 115.8873	5.12e-07	+++-+++++++-++-+++-++--++--+	5.5
cg18150280	1	RGS2	-48.9977	9.75772	-68.1228 , -29.8726	5.13e-07	-+---------++--?-+--+-------	30.2
cg18082515	10	MYOF	-34.5463	6.88138	-48.0338 , -21.0588	5.16e-07	--++-------++--+----+-+-----	0
cg18238908	1	PHC2	-63.9621	12.7403	-88.9331 , -38.9911	5.16e-07	-+----+----++-+--+--+-+---+-	23
cg12592359	20	ASXL1	-40.7874	8.12537	-56.7132 , -24.8617	5.17e-07	----+------+---------+------	13
cg14643399	13	SMIM2-IT1	-67.1257	13.3716	-93.3341 , -40.9174	5.17e-07	---------------------+--+---	49.6
cg03434029	1	BTBD19	68.241	13.5971	41.5907 , 94.8914	5.2e-07	+++-+--++++-+++?++++-+-+++-+	11.9
cg23588699	1	TNFRSF25	101.645	20.2536	61.9484 , 141.3425	5.2e-07	++++++++-?+--+++++++++++++--	14.3
cg06321376	5	STARD4	-67.7747	13.5062	-94.2469 , -41.3025	5.22e-07	---+---+-----++---+---------	33.4
cg09234616	11	WT1	-61.4914	12.2614	-85.5238 , -37.459	5.3e-07	---+-+-+----------+--+-+-++-	0
cg07830557	19	SH3GL1	83.3846	16.6272	50.7953 , 115.9739	5.31e-07	+--++++++++++++++++++-++++++	6.8
cg08616943	7	NA	-51.1307	10.1969	-71.1165 , -31.1448	5.32e-07	---+--------+--------------+	55.1
cg00055341	2	SATB2-AS1	60.7371	12.1176	36.9865 , 84.4876	5.38e-07	++++++++--++++-++++++-++++-+	0
cg22811478	7	DOCK4	-51.2017	10.2159	-71.225 , -31.1784	5.39e-07	+---?--------++------------+	19.8
cg19776942	1	FAM167B	87.9745	17.5557	53.5654 , 122.3837	5.41e-07	---+-+++++++-+-++++++-++++++	57.2
cg11254532	1	NFIA	56.2745	11.2314	34.2609 , 78.288	5.43e-07	+++++++++++-+++++--+++-+++-+	0
cg17560073	8	FER1L6	-41.5723	8.29888	-57.8381 , -25.3065	5.46e-07	----?---++----++----+------+	9.9
cg15165154	5	CXXC5	43.0394	8.59219	26.1987 , 59.8801	5.47e-07	++---+++-++-+++++++++-?++-?+	0
cg17749033	17	SLC16A3	94.8847	18.9426	57.7572 , 132.0121	5.47e-07	++++++++-+++++++++++--+++-++	9.9
cg25072666	17	NPLOC4	-76.4918	15.2714	-106.4238 , -46.5599	5.48e-07	-+---------------++--+++---+	8.9
cg08884974	15	LOC283710	-62.4635	12.4731	-86.9107 , -38.0163	5.5e-07	----------+-+-------+--+----	38.6
cg17393635	19	CD37	68.1657	13.6111	41.4881 , 94.8434	5.5e-07	+++-++-+++++++--++++++-+++-+	34.9
cg25011252	8	CHD7	59.4382	11.8687	36.1755 , 82.7008	5.5e-07	++++--+-++++-+++++-++---++++	31.2
cg11273000	19	MIER2	-69.8536	13.9503	-97.1961 , -42.5111	5.52e-07	---+?+-----------+----------	0
cg26640901	10	WBP1L	79.2813	15.8337	48.2474 , 110.3153	5.52e-07	-+-+++++++++-++-+++--+++++-+	29.7
cg19805160	1	CFAP45	-51.7254	10.3344	-71.9808 , -31.47	5.58e-07	--++--------+--+-----+-+----	42.4
cg05166871	17	SKAP1	49.6113	9.91273	30.1823 , 69.0402	5.59e-07	+++++++++-++-++-+++++--+++++	22.2
cg16198103	8	FAM150A	-36.9963	7.39216	-51.4849 , -22.5077	5.59e-07	--+-------+-+--+--+-+-++-+--	18.6
cg04086394	1	GLRX2	97.6962	19.5221	59.4329 , 135.9595	5.6e-07	+++++-+--++-++++++++++--++++	26.7
cg12006375	13	GUCY1B2	-36.3269	7.25886	-50.5543 , -22.0996	5.6e-07	--+--+---+----+?--+-----+--+	27.3
cg23692620	19	ZNF253	-56.6657	11.3229	-78.8586 , -34.4728	5.6e-07	---+--++-?--+-------+++-----	30.1
cg14759565	11	EHBP1L1	24.8784	4.97196	15.1334 , 34.6234	5.62e-07	+-+++-+++-++-+-+++-++---++--	14.8
cg20733077	13	DLEU1	31.5266	6.30036	19.1779 , 43.8753	5.62e-07	-++++-++-++-+--+++++-+-+++-+	35.1
cg00056066	10	ARHGAP21	29.8343	5.96248	18.1479 , 41.5208	5.63e-07	+++--++++++++++-+++++--++-++	0
cg19710184	2	PDCD1	-109.778	21.9428	-152.7863 , -66.7705	5.65e-07	-----+---+----+?------------	30.2
cg03852144	5	GLRX	76.7888	15.3504	46.7019 , 106.8757	5.66e-07	+++-++++++++++++++++++-+++++	0
cg13547053	2	OSBPL6	-55.7784	11.1502	-77.6329 , -33.924	5.66e-07	--------+-----++------------	0
cg00920254	6	SLC29A1	-45.9652	9.19022	-63.978 , -27.9523	5.69e-07	---------?-+-++?-+----------	27.1
cg25279613	7	OSBPL3	-54.0001	10.7967	-75.1617 , -32.8385	5.69e-07	-+---+--------+--+--+-+-----	11.8
cg07170300	12	LRIG3	-52.5097	10.4999	-73.0895 , -31.9299	5.7e-07	----?------+---?-+----------	0
cg20716774	5	ANKRD33B	-78.9522	15.7939	-109.9082 , -47.9962	5.77e-07	+---?--+---+--+--++---------	4.3
cg05313153	8	EXT1	52.236	10.4524	31.7493 , 72.7227	5.81e-07	++-+-++++-+++++?++--+-+--+++	39.6
cg05689413	6	MED20	-45.0434	9.01373	-62.7103 , -27.3765	5.82e-07	----?-----+++-+?-+--+-------	0
cg00679184	14	EIF2B2	68.7962	13.7685	41.81 , 95.7825	5.83e-07	+++++++++++-+++++--+-+++++++	27.5
cg00957580	14	NDRG2	-46.146	9.23525	-64.2471 , -28.0449	5.83e-07	---??-----++--------+++----+	0
cg06727242	14	RAD51B	-59.7184	11.9517	-83.1438 , -36.293	5.83e-07	--+-+--------+----+---+-----	0
cg20012888	2	GLI2	-48.5308	9.71266	-67.5676 , -29.494	5.83e-07	--++-----------?----++++++--	38.2
cg21869609	19	SPPL2B	50.248	10.0562	30.5379 , 69.9581	5.83e-07	+++++-+++++++++?++-+-+-+-+-+	21.9
cg12473797	1	PRDM16	55.5635	11.1205	33.7674 , 77.3597	5.84e-07	+++++++++++--++-++++-+-+++-+	33.7
cg02789362	6	CCDC170	-50.4523	10.0983	-70.245 , -30.6597	5.85e-07	+----+-----++---+---------?-	27.5
cg19727396	1	GALNT2	36.0398	7.21348	21.9014 , 50.1782	5.85e-07	++-?+++++++-++-?++-++-+-+-++	39.1
cg24144853	3	LINC00884	-90.2397	18.062	-125.6413 , -54.8381	5.85e-07	--+-----------+--+----+-----	0
cg07056299	7	ELN	53.9829	10.8094	32.7964 , 75.1694	5.91e-07	+++--++++++++++?++++-+++-+-+	48.7
cg05822633	20	BTBD3	-32.3437	6.47654	-45.0378 , -19.6497	5.92e-07	-------+---++----+----+-----	14.3
cg12419482	11	P2RY2	-71.6995	14.3633	-99.8515 , -43.5475	5.98e-07	----++-----------+------+---	48.7
cg14230238	19	RFX2	-55.2548	11.0762	-76.9641 , -33.5454	6.08e-07	---+--------+-+-----+-+-----	0
cg06728103	12	SOCS2-AS1	-87.3166	17.5043	-121.6251 , -53.0082	6.09e-07	-+-+--++------+---+-+-?---?-	26.9
cg03281139	19	NFIC	-67.1332	13.4619	-93.5185 , -40.748	6.14e-07	----?-++--+----?-----+------	46.3
cg25432518	7	MAD1L1	45.9767	9.2198	27.9059 , 64.0475	6.14e-07	+---?-++-+++++--+++++++++++-	38.1
cg09718037	12	MAP1LC3B2	-41.6372	8.35023	-58.0036 , -25.2707	6.15e-07	--------++++---------++----+	19.8
cg03106207	2	DUSP2	80.927	16.2359	49.1047 , 112.7494	6.21e-07	++-+-+++++++-++-++++--+-++-+	6.1
cg07844518	16	MIR5093	68.5452	13.7554	41.5845 , 95.5059	6.26e-07	++-+?-++++++-++-+++++++-++++	49
cg04891040	16	CDH5	-78.2065	15.6956	-108.9698 , -47.4431	6.27e-07	--+----+---------+----------	0
cg10095247	7	ANKIB1	-66.1899	13.2839	-92.2265 , -40.1534	6.27e-07	--------------+---+---+----+	15.1
cg00000714	19	TSEN34	83.505	16.76	50.6554 , 116.3546	6.28e-07	++-+-+++-+++-+++++++-+++--++	45.4
cg17712818	17	BCAS3	-62.6324	12.5785	-87.2862 , -37.9786	6.38e-07	--+-?+--++-+--++--+---+-----	5.4
cg20460227	2	TMEM177	49.9228	10.0265	30.2709 , 69.5747	6.39e-07	++-++--++-+++++-+++++-+-+--+	27.1
cg21386414	1	PDIK1L	38.9206	7.81791	23.5975 , 54.2437	6.41e-07	+++++++++-+-++++++++--+-+--+	0
cg16517298	1	GALNT2	32.5909	6.54682	19.7591 , 45.4227	6.42e-07	++-++-+++++-+++-+++++-++++++	43.9
cg21444731	22	GUSBP11	58.3817	11.7273	35.3961 , 81.3673	6.42e-07	++++++++++++-++-++-+-+++++-+	23.3
cg03433048	17	CHRNE	-55.4129	11.1333	-77.2341 , -33.5916	6.45e-07	-------+-------?--+---+----+	37.6
cg15715853	3	MED12L	-77.2977	15.5308	-107.738 , -46.8573	6.46e-07	----+------+------+-----++--	0
cg25368824	5	IL4	-60.129	12.0814	-83.8084 , -36.4495	6.46e-07	--------+-+---+--+---+------	13
cg23091302	3	KCNH8	-41.4843	8.33575	-57.8224 , -25.1463	6.47e-07	+-------+--+-----++---+-----	0
cg01488300	1	MEGF6	-90.2554	18.1372	-125.8043 , -54.7066	6.48e-07	------------++---++---+---++	32.4
cg10067062	21	PDE9A	-56.6155	11.3767	-78.9137 , -34.3172	6.48e-07	------------+----------+----	27.8
cg10257332	3	DHX30	-65.0946	13.0823	-90.736 , -39.4532	6.5e-07	-----+--------+?-+---++-----	26.7
cg27483469	21	DOPEY2	-44.2484	8.89446	-61.6816 , -26.8153	6.53e-07	-++--------+-+--------+-----	0
cg15260921	1	ACBD3	81.9864	16.4825	49.6806 , 114.2922	6.55e-07	+++++-++-++-++-?+++-+++++++-	0
cg23801885	6	PACSIN1	85.9253	17.2742	52.0678 , 119.7828	6.55e-07	-+++?++++++--++++++-++++++-+	51.2
cg18587063	11	CLMP	-40.9573	8.23497	-57.0979 , -24.8168	6.57e-07	--------+--++-+?----+-+----+	0
cg12455309	6	EXOC2	52.9492	10.6466	32.0818 , 73.8166	6.58e-07	+++++++++++++++-++++--++-+++	22
cg11231069	2	HDAC4	53.0463	10.6669	32.1392 , 73.9533	6.59e-07	++-+++--++++-+-+++-+-++-++-+	50.1
cg02966574	15	CORO2B	-83.5697	16.8056	-116.5088 , -50.6306	6.6e-07	+----+-+---+-----++--+------	15.8
cg27540367	19	TGFB1	51.7481	10.4071	31.3502 , 72.1461	6.61e-07	++-+++++++++-++++++-+++-++++	21.7
cg14239592	19	ZNF274	-48.4349	9.7411	-67.5275 , -29.3423	6.62e-07	+---++-------+-?------+--+--	56
cg19750606	22	BPIFC	-49.8241	10.0204	-69.464 , -30.1842	6.62e-07	---+?-----------------++---+	38.3
cg01132893	17	MIR196A1	-42.3251	8.51372	-59.012 , -25.6382	6.65e-07	-+++----------+?--------+---	0
cg02237342	22	SPECC1L	50.4994	10.1582	30.5893 , 70.4095	6.65e-07	+++-++-+-+++-+-?+++++++-++++	41.7
cg21491967	6	NOX3	-36.0053	7.24252	-50.2007 , -21.81	6.65e-07	--++++--+--+---+--+-+---+---	5.1
cg25010752	1	SLC22A15	-35.1162	7.06847	-48.9704 , -21.262	6.76e-07	-----+--+----++--+--+-+---+-	22.4
cg23366234	21	AIRE	68.7036	13.8295	41.5977 , 95.8094	6.77e-07	++-++++-+++++-+-++-+-+++++--	36.9
cg21975390	11	RPL27A	-45.2519	9.10992	-63.1074 , -27.3965	6.79e-07	-----+------------+--------+	43.9
cg07987148	20	TP53RK	-44.9354	9.04884	-62.6711 , -27.1997	6.84e-07	-------++---+-----+-++-----+	6.1
cg18248586	11	DRD2	-51.5695	10.3853	-71.9248 , -31.2143	6.85e-07	-+------------+?-+--+-----++	52.1
cg22626683	1	TNFSF18	-39.18	7.89026	-54.6449 , -23.7151	6.85e-07	+-+-+-------+-+-------------	38
cg24947456	12	MYO1A	70.135	14.1256	42.4489 , 97.8212	6.87e-07	+++-++++-++--++-+++-+++-+-++	20.7
cg15079934	11	LSP1	75.1497	15.1385	45.4783 , 104.8212	6.9e-07	+++++++++++++-++++-+--++++-+	0
cg09247486	1	NFIA	-67.9339	13.6854	-94.7572 , -41.1106	6.91e-07	--+?--------+--?-+---+-+----	38.4
cg07706758	16	TSC2	128.344	25.8586	77.6608 , 179.0264	6.93e-07	-++??+++++++-++++++++++++--+	44.2
cg18028767	11	TSPAN4	-69.796	14.0635	-97.3606 , -42.2315	6.95e-07	-------+------+?-++---+----+	18.1
cg08808720	2	KIF5C	-49.7992	10.0354	-69.4686 , -30.1298	6.96e-07	--++-------++--?-+---+------	49
cg10060338	16	ACSM3	-40.6331	8.18787	-56.6814 , -24.5849	6.96e-07	--+-+---++-++--+------?-----	36.4
cg02639095	9	TTC39B	-53.2832	10.7378	-74.3292 , -32.2373	6.97e-07	----+---+---+---------------	0
cg07631359	3	IRAK2	58.3922	11.7677	35.3275 , 81.4569	6.97e-07	+++++++-+++-++-?++-+-+++++-+	26.9
cg09749225	6	LINC01558	24.2876	4.89471	14.694 , 33.8812	6.98e-07	++--++-++++++++?++-+-++++--+	0
cg14477584	15	MESP1	-76.2832	15.3768	-106.4217 , -46.1447	7.02e-07	++-??----------+----+-------	7.4
cg04986931	22	MGAT3	-64.1878	12.9415	-89.5532 , -38.8224	7.06e-07	---?------+-+--------+------	36.1
cg24425149	13	TBC1D4	-70.4167	14.2037	-98.2559 , -42.5774	7.14e-07	------+-----+-+-------------	13
cg07375256	7	ZSCAN25	44.8275	9.04397	27.1013 , 62.5537	7.17e-07	++-+++++++++-+-++++++---++-+	31.9
cg15783941	19	NFIX	43.896	8.85599	26.5383 , 61.2538	7.17e-07	+++++++-+++++++++--+++-+++-+	23
cg01178624	11	KCNK7	20.9654	4.23024	12.6741 , 29.2567	7.19e-07	+++++-++++++-++-++-++-++++-+	24
cg07461837	16	PYCARD-AS1	-58.0624	11.7154	-81.0246 , -35.1002	7.19e-07	-+--?----------+-----+------	26.8
cg08157575	14	MEG9	61.5768	12.4241	37.2255 , 85.9281	7.19e-07	++-?---+-++-+++-++-++-++-+-+	0.2
cg08551036	16	ACSF3	52.9636	10.6873	32.0166 , 73.9107	7.21e-07	+--++-+++++-++++++-+-++-++-+	51.1
cg18416096	5	SYNPO	-77.6937	15.6791	-108.4247 , -46.9628	7.22e-07	--+-+----+------------------	21.3
cg27070951	15	SLCO3A1	-82.7725	16.7057	-115.5157 , -50.0294	7.24e-07	------------+-+-----+----+--	0
cg04751761	16	SLC9A3R2	55.201	11.1442	33.3584 , 77.0437	7.3e-07	+-+-+++++++--++-++++-++++--+	20.2
cg04997045	4	CTBP1	39.9404	8.06366	24.1356 , 55.7452	7.3e-07	-++?+++++++--++-++-+-+-+++++	39.1
cg25197194	3	EFCC1	-33.2452	6.71239	-46.4015 , -20.0889	7.32e-07	-----+------------+---------	28.6
cg15143809	11	ARHGEF12	71.9641	14.5372	43.4712 , 100.4571	7.41e-07	+++++-++++++-+-++++++++--+-+	0
cg09410512	2	AP1S3	-55.6708	11.2508	-77.7224 , -33.6192	7.49e-07	--+-+-+-----+---+---++------	35.3
cg27492286	7	UBE3C	-42.67	8.62341	-59.5718 , -25.7681	7.49e-07	---+--+---+---++------+-----	20.7
cg10574006	5	ZNF608	-44.1334	8.92137	-61.6193 , -26.6475	7.54e-07	---++-+-------+------+------	0
cg27504369	22	APOBEC3A_B	-42.4938	8.59099	-59.3322 , -25.6555	7.56e-07	------------+-+?-++--------+	37.2
cg00609473	14	REM2	-78.9398	15.9602	-110.2218 , -47.6578	7.57e-07	-----------+--+---+---+-+--+	22.3
cg09845489	7	PTPRN2	46.7876	9.45982	28.2464 , 65.3289	7.58e-07	-+-+--++-?++-+-+++-++++++-++	30.5
cg00769843	11	OTUB1	92.1282	18.6301	55.6133 , 128.6431	7.61e-07	+-+++++++++-+++++++++---+-++	34.1
cg09940677	14	CDC42BPB	73.6799	14.9017	44.4725 , 102.8872	7.64e-07	---?-+-++++----+++++--++++++	43.8
cg07932300	6	HECA	-67.7146	13.6971	-94.5608 , -40.8684	7.66e-07	--+---------------+--------+	6.3
cg18499530	3	RUBCN	-55.8284	11.294	-77.9647 , -33.6922	7.69e-07	--+----+-------?-----+---+--	0
cg20100745	8	NDRG1	37.4683	7.58163	22.6083 , 52.3283	7.73e-07	++--+-++++++++++++-++++-++-+	24.7
cg11383291	3	ITGB5	-51.2402	10.3689	-71.5632 , -30.9173	7.74e-07	--+-?------++-+?-----++-----	49.9
cg20229014	8	ST3GAL1	-96.9298	19.6168	-135.3788 , -58.4809	7.77e-07	-----+-----+---+--+---+-+--+	16.7
cg06438797	16	CA7	-59.2551	11.9932	-82.7619 , -35.7483	7.78e-07	---+----+---+--?-+----------	31.7
cg06455422	13	FARP1	-52.5108	10.6279	-73.3415 , -31.6802	7.78e-07	--++------+-+-+--+---+----?-	44.3
cg13349472	2	DNMT3A	45.3415	9.17709	27.3544 , 63.3286	7.78e-07	++-++-+++++-++++++++---++-++	30.8
cg03883572	5	MAST4	45.8833	9.28798	27.6789 , 64.0878	7.81e-07	+-+-++++-+++++++++++---++-++	0
cg03480383	16	SPIRE2	62.7204	12.6982	37.8319 , 87.6088	7.84e-07	+++++++++++++++-++++--++++-+	9.6
cg10198943	5	IQGAP2	-56.6892	11.483	-79.1958 , -34.1826	7.94e-07	---??-+----------+-----+----	28.9
cg07068382	6	MTCH1	54.6169	11.064	32.9314 , 76.3025	7.96e-07	++-??-+++++--+++++++---++-++	11.6
cg13692655	9	FAM102A	67.6381	13.703	40.7802 , 94.4961	7.97e-07	+--+-++++++-+++-++++-+-++--+	0
cg09166091	2	LINC00607	48.4175	9.80916	29.1916 , 67.6435	7.98e-07	+++?-+++++++-++?+++++--+--++	19.5
cg20072118	12	KRT86	-47.5493	9.63585	-66.4356 , -28.6631	8.03e-07	------+-------+---+--------+	9
cg12520319	15	CHSY1	-62.6146	12.6939	-87.4947 , -37.7344	8.11e-07	++--?+++------+---+-+-+-+---	46.5
cg13940908	1	CHD5	-43.4387	8.80609	-60.6987 , -26.1788	8.11e-07	---+----+-------------+-----	0
cg17403995	1	NRDC	-60.08	12.1797	-83.9522 , -36.2078	8.11e-07	---+?---------------+--+--+-	11.2
cg20660269	22	SPECC1L	49.0655	9.94724	29.5689 , 68.5621	8.12e-07	++--++-++++--++?++++++++++++	20.9
cg12403162	10	ABLIM1	-60.4641	12.2622	-84.4979 , -36.4303	8.18e-07	-++-+-------+-++-++--++-----	23.1
cg03691549	12	LOC283335	60.6657	12.3033	36.5514 , 84.7801	8.19e-07	+++-++++++++-+++++-+-+-+++-+	11.6
cg18428006	5	HNRNPAB	73.3587	14.8856	44.1829 , 102.5345	8.3e-07	+-++?+++-++---+-+++++--++--+	55.1
cg15160524	2	TNS1	-65.8842	13.3728	-92.0948 , -39.6735	8.36e-07	----?-+-----+--?-+----------	40.5
cg11832281	10	CELF2	98.2794	19.9504	59.1767 , 137.3821	8.39e-07	++-+?+++++++-++++++--++++-++	37.1
cg12492900	12	EP400	145.375	29.511	87.5331 , 203.2161	8.39e-07	++--++++++-+-++?+++-+-+-++++	33.5
cg24390871	12	ART4	-60.3343	12.251	-84.3463 , -36.3223	8.44e-07	--+??-----++---?-++----+----	35.7
cg05793930	1	GSTM2	52.559	10.6739	31.6382 , 73.4799	8.48e-07	++-++++++?++-++?++-++---++++	21.1
cg10791541	3	CACNA2D3	-52.1799	10.597	-72.95 , -31.4098	8.48e-07	------------+--+--+-+---+---	9.2
cg26959655	8	UBR5	-47.3763	9.62443	-66.2402 , -28.5124	8.54e-07	----?+------------------+---	0
cg11429111	5	TIFAB	-38.8146	7.88541	-54.27 , -23.3592	8.55e-07	--+-----+------+----++-++---	44.6
cg13440652	12	CHFR	36.1917	7.36018	21.7657 , 50.6176	8.78e-07	++++++++++++-+--++++--++++-+	45.5
cg00390724	3	SATB1	37.1168	7.54958	22.3196 , 51.914	8.82e-07	++++++++++++-++-+++++++-++-+	32.9
cg08005460	17	RARA	70.8707	14.4198	42.6078 , 99.1336	8.89e-07	++++?+++++++-+++++++-+++++++	16.5
cg21099148	17	ARHGAP23	66.3443	13.5007	39.8829 , 92.8056	8.92e-07	+-++++-+-++++++?++++++-+++++	0
cg00285394	8	SQLE	-39.0478	7.9467	-54.6233 , -23.4723	8.94e-07	---??--+----++---++---------	1.1
cg12035103	2	TRAPPC12	64.9683	13.2228	39.0516 , 90.8849	8.95e-07	+-+??++++++++---++++++++++-+	7.7
cg19311375	2	EPAS1	-72.7009	14.7976	-101.7042 , -43.6976	8.97e-07	------------+----+---+------	8.5
cg00873351	17	CD300LB	-47.1257	9.5936	-65.9291 , -28.3222	9.01e-07	------------+--?-++-+------+	48.1
cg21550107	5	FGF1	-52.0096	10.5905	-72.767 , -31.2522	9.06e-07	+++-+------+----------------	56.6
cg09361614	3	IQSEC1	-46.3334	9.43602	-64.828 , -27.8388	9.1e-07	--++--+-----+-++-------+----	26
cg11608884	11	LSP1	56.0327	11.4135	33.6622 , 78.4033	9.14e-07	---+--++++++-+--+++++--+++++	6.8
cg26255314	11	CD5	-93.4788	19.0422	-130.8016 , -56.156	9.15e-07	----+----+----------+-+-----	0
cg13012868	14	GPR68	64.7697	13.1949	38.9077 , 90.6318	9.17e-07	+--+-+++++-+++-+++-+++--++-+	27.8
cg12765382	17	PPY2P	97.7509	19.915	58.7175 , 136.7842	9.18e-07	++-++++-+?+--++-++++-+++++-+	12
cg00162806	10	VENTX	39.2973	8.00763	23.6024 , 54.9923	9.23e-07	++++++++-++++++++++++++-++-+	17.3
cg17158913	1	CASZ1	55.0564	11.2211	33.0631 , 77.0498	9.27e-07	++++++++++++-++-++++++-+++-+	23.6
cg00292107	1	MARCKSL1	78.3166	15.9623	47.0305 , 109.6026	9.28e-07	+-+++-+++++--+-+++++--++-+++	21
cg14567917	10	C10orf11	-43.8631	8.94239	-61.3902 , -26.336	9.34e-07	----+------+-+-+------+-+---	18.3
cg17973115	1	RUNX3	-50.792	10.3557	-71.0891 , -30.4948	9.36e-07	-+--?------++-----------+---	0
cg01261939	6	LY86	92.3287	18.8266	55.4286 , 129.2287	9.38e-07	++-+-+++++++-+++++++++++++++	15
cg13894535	5	CAPSL	-27.8898	5.68905	-39.0403 , -16.7392	9.47e-07	--+--+-+---++--+----+-------	11.8
cg15452381	1	HIVEP3	-72.9274	14.8782	-102.0887 , -43.766	9.51e-07	--++--+------+---+----++----	25.3
cg00835193	19	SPPL2B	33.1652	6.76794	19.9001 , 46.4304	9.57e-07	++++++++++++++++++++-+---+-+	0
cg00222799	21	ABCG1	60.7634	12.4052	36.4492 , 85.0775	9.67e-07	+++++++++++++++-++-++--+++-+	27.4
cg19988492	21	DYRK1A	-39.7507	8.1161	-55.6582 , -23.8431	9.69e-07	---++-------+-----+---+-----	31.8
cg23302730	2	AOX1	-135.875	27.7496	-190.2643 , -81.4859	9.76e-07	--------+------------+------	0
cg24843609	1	PMF1-BGLAP	53.8324	10.9944	32.2835 , 75.3814	9.76e-07	+---++++-+++-++?++++-+-++--+	35.1
cg14907788	19	GNG7	70.7856	14.4586	42.4469 , 99.1244	9.79e-07	+++-+++-++++++++++-+++-+++-+	15.1
cg07276388	3	CACNA2D3	-59.5391	12.1655	-83.3836 , -35.6946	9.88e-07	--+?----------+--+--+-------	33.1
cg03420068	3	BOC	-39.4192	8.05479	-55.2065 , -23.6318	9.89e-07	-----------+-+---++-+-+++-+-	39.7
cg06429555	11	ATG16L2	48.6701	9.94607	29.1758 , 68.1643	9.91e-07	+-++-+++++++-++?++++-++++-++	0
cg25292244	2	PRKCE	128.16	26.1906	76.8264 , 179.4937	9.91e-07	++++++++-+++++-++++-+-++++++	0
cg02116283	2	MIR4435-2HG	-39.5501	8.08276	-55.3923 , -23.7079	9.92e-07	----+----+-+--+?------+-----	13
cg22455527	7	CLDN4	-49.4123	10.1009	-69.2101 , -29.6145	9.99e-07	--------+---+-+?-+---------+	33.3
cg05232694	20	CEBPB	36.2637	7.41426	21.7317 , 50.7956	1e-06	++-+++++++++++-+++++++-+---+	18.9
cg05376185	1	MOB3C	-47.4869	9.70775	-66.5141 , -28.4597	1e-06	-----+-+------++-+--+----++-	40.2
cg10057295	13	STK24	-70.1344	14.3378	-98.2366 , -42.0323	1e-06	-------+--+-+++--++--------+	22.8
cg02927346	17	RASL10B	75.8514	15.5117	45.4484 , 106.2545	1.01e-06	++-+++++-+++-++-+++++-+---++	34.1
cg04064583	4	ABCG2	-40.1274	8.20664	-56.2124 , -24.0424	1.01e-06	-+--+---+--+---?------------	0
cg07419740	5	ATP6V0E1	-106.49	21.7765	-149.1715 , -63.8077	1.01e-06	--+-?--+++-++----++--+------	36.9
cg10071882	16	HSBP1	36.5065	7.46687	21.8715 , 51.1416	1.01e-06	+++??++-++-++++-+++++++++--+	0
cg23260877	5	GFPT2	-83.8141	17.1373	-117.4032 , -50.225	1.01e-06	-----+--------+?--+-++-----+	26
cg03661110	17	MYCBPAP	58.1446	11.8935	34.8333 , 81.4558	1.02e-06	+++-++++++++-++?+++--++++-++	3.3
cg18716635	8	GDF6	-35.6854	7.30116	-49.9957 , -21.3751	1.02e-06	--------+-++-----+--+-?---?+	19.3
cg13089335	1	POU2F1	-47.7679	9.77818	-66.9331 , -28.6027	1.03e-06	----?-------++-?-+--+--+----	45.3
cg13870990	18	DSC2	101.091	20.6907	60.5376 , 141.645	1.03e-06	++-+++++-++-+++?++++-+-++-++	21.5
cg16429725	16	KIFC3	-56.3377	11.5308	-78.9381 , -33.7374	1.03e-06	----------+-+-++-----------+	5.6
cg19411729	17	CCL5	-70.995	14.5281	-99.47 , -42.52	1.03e-06	-++---+-+--+--+?-----+------	19.6
cg25270424	7	OSBPL3	-83.6146	17.114	-117.1582 , -50.0711	1.03e-06	--------+---+-++-+-+-+------	5.2
cg13828047	15	MPI	57.6199	11.7983	34.4952 , 80.7446	1.04e-06	-+-+?++++++++++?++++-++-++-+	35
cg20294319	13	LRCH1	-44.7915	9.17067	-62.766 , -26.817	1.04e-06	---+----+------+----+++-----	17.3
cg25949550	7	CNTNAP2	104.897	21.475	62.8063 , 146.9884	1.04e-06	+----+++++++-+++++-+-++-+-++	30.2
cg00829404	1	NFIA	-82.5208	16.8999	-115.6446 , -49.3971	1.05e-06	----?---+--+-----+----++-+--	8.7
cg02871659	16	RPS2	55.4741	11.3636	33.2014 , 77.7469	1.05e-06	++-++++++++++-+++++-++--++++	25.4
cg13418576	9	CRB2	-40.594	8.31766	-56.8966 , -24.2914	1.06e-06	--+--------+----------+-+---	6.8
cg01412469	7	INHBA	-50.3564	10.3207	-70.585 , -30.1279	1.07e-06	----------++---?----+-------	14.1
cg01634388	4	PGRMC2	35.344	7.24379	21.1461 , 49.5418	1.07e-06	?-+---++++++-++-++++--+++-++	47.4
cg16824319	1	LYPD8	68.2187	13.9821	40.8137 , 95.6237	1.07e-06	-+++?++++++--+++++++++-+++-+	37.8
cg23176538	14	AKT1	51.2848	10.5142	30.6769 , 71.8927	1.07e-06	++++-++++++--++++-+-+++++--+	27.4
cg00619505	13	TMCO3	55.5719	11.3962	33.2353 , 77.9086	1.08e-06	+++++-++-++--+++++-+++++++-+	18.8
cg06263843	15	CPEB1	-111.872	22.9396	-156.8339 , -66.9107	1.08e-06	+--++---------+-+-+-+-+----+	6
cg19119594	22	PRR5	44.1117	9.04547	26.3826 , 61.8409	1.08e-06	+++??-++++++++??+++++-+?++++	37.9
cg19460950	5	PDE6A	-44.2472	9.07407	-62.0324 , -26.462	1.08e-06	-++--------------+--+-------	14.3
cg23205648	13	LCP1	68.3658	14.0191	40.8884 , 95.8431	1.08e-06	++-??+++++---++++-+++++-++++	35.3
cg04037905	10	PDLIM1	-120.99	24.8208	-169.6389 , -72.3415	1.09e-06	-+---+--+---+----+--++------	12.6
cg06572563	19	SBNO2	83.1241	17.0495	49.7072 , 116.5411	1.09e-06	++--++++++++++-++++++-++---+	30
cg10107473	2	EPAS1	-72.0385	14.7829	-101.0129 , -43.0641	1.1e-06	-+-?+---------+?-++--+-----+	42.6
cg11465630	21	C21orf33	81.7134	16.771	48.8423 , 114.5845	1.1e-06	++--+-+-+++++---++-+++-++--+	41.8
cg26796670	2	C2orf57	-59.5172	12.2152	-83.459 , -35.5754	1.1e-06	+---+---------+---+---+-+---	7.7
cg27072575	17	PLEKHM1P1	69.7206	14.3152	41.6629 , 97.7784	1.11e-06	+-+++-+++?+--+++++-+++-+-+-+	25.7
cg04478905	21	CLDN14	54.4282	11.1783	32.5188 , 76.3375	1.12e-06	+--+++++-+++++-+++-++-++++-+	28.2
cg07366670	12	CUX2	-89.0242	18.281	-124.8549 , -53.1935	1.12e-06	--+-+--+------+?-+----+-----	10
cg11581865	11	OAF	57.2235	11.7503	34.1928 , 80.2541	1.12e-06	++++++++++++++-?++++++-+--++	0
cg20938359	12	SLC6A12	-51.1227	10.4997	-71.702 , -30.5434	1.12e-06	----+------+---?-++--------+	21.1
cg25185001	7	GBX1	72.9328	14.9789	43.5743 , 102.2914	1.12e-06	++-+--+++++--++?++++--++-+++	0
cg27368523	2	IL1A	-49.0698	10.0784	-68.8233 , -29.3162	1.12e-06	-----+-----++--+--+---+----+	0
cg08284496	17	GRB7	-63.6692	13.0818	-89.3096 , -38.0288	1.13e-06	---?----+---++-?------+++---	51
cg13846270	13	DLEU7-AS1	53.4334	10.9762	31.92 , 74.9468	1.13e-06	+++++++++++++++?++-+++-+++++	0
cg13896106	17	SLC9A3R1	-56.3011	11.5671	-78.9726 , -33.6297	1.13e-06	-------+---------++--+------	36.8
cg19343611	22	MN1	40.71	8.36297	24.3186 , 57.1014	1.13e-06	++-++-++++++++-?++++++-++-+-	0
cg26290716	14	CCDC88C	53.8026	11.0544	32.136 , 75.4693	1.13e-06	+++++++++++-++++++++++--+-++	54.7
cg11104712	17	TMEM256-PLSCR3	55.4014	11.3872	33.0825 , 77.7202	1.14e-06	++++-+-++++-++-+++++---+---+	0
cg13581422	3	COL6A5	-52.6786	10.8246	-73.8949 , -31.4623	1.14e-06	-------+---++---++--+---+---	38.7
cg23005227	3	CISH	51.5389	10.5902	30.7821 , 72.2958	1.14e-06	+++?--+--+++++++++++---+++-+	11.2
cg24873093	1	PRDX1	-54.1554	11.1305	-75.9713 , -32.3395	1.14e-06	-+---------+--+?-+--+-+----+	10.9
cg26310285	7	CFTR	-48.2928	9.92624	-67.7482 , -28.8373	1.14e-06	-----+----+-----------+--+--	0
cg00108715	3	NT5DC2	59.5142	12.2347	35.5341 , 83.4942	1.15e-06	+--+++-++++-++++++-+-+-+---+	21.9
cg05971148	7	ACTB	116.387	23.9278	69.489 , 163.2859	1.15e-06	+++++++++-+-++-+++++-+++++++	57.6
cg00309945	1	LDLRAD2	55.1136	11.3348	32.8975 , 77.3298	1.16e-06	+++++-+++++--+++++-+++++++-+	0
cg01521220	17	SKAP1	43.6915	8.98587	26.0792 , 61.3038	1.16e-06	+++++++++-++-++-+++++--++-++	17.1
cg02423534	12	ADCY6	-61.1909	12.5854	-85.8582 , -36.5236	1.16e-06	-+---------+--+?-+----------	19.2
cg12033615	6	ARID1B	57.5807	11.8439	34.3666 , 80.7948	1.16e-06	+--+--+++++++++?++++++--++-+	31.7
cg18128887	1	RCAN3	36.8243	7.57289	21.9815 , 51.6672	1.16e-06	++-+--++++++-+-++-+++-++++++	10.2
cg25312054	13	IRS2	69.8466	14.3641	41.693 , 98.0003	1.16e-06	+++++++-+++--+++++++++++++-+	12.1
cg00019841	18	MAPK4	-44.1731	9.08662	-61.9829 , -26.3633	1.17e-06	-+--++--++-+---+----+-------	33.4
cg09914444	1	DMBX1	-59.1947	12.1877	-83.0826 , -35.3069	1.19e-06	----?----------?----+------+	10.2
cg15141868	7	EPDR1	-54.4751	11.2135	-76.4535 , -32.4966	1.19e-06	+---------+-+--+-----+------	7.5
cg10359157	13	DLEU7-AS1	45.1889	9.30761	26.9459 , 63.4318	1.2e-06	++++++++++++-+++++-+++--++-+	0
cg00781658	19	HNRNPUL1	-50.5965	10.4238	-71.0271 , -30.1659	1.21e-06	----?+-+--+----?--+--------+	56.4
cg03603593	8	LINC00589	-83.3669	17.1729	-117.0257 , -49.7082	1.21e-06	--+++--+------+--+---+------	8.9
cg13911707	1	ZNF496	40.6033	8.36578	24.2064 , 57.0002	1.21e-06	+++-++-++++-++++++---+-+-+++	16.5
cg27475169	11	MCAM	-66.3459	13.6702	-93.1395 , -39.5522	1.21e-06	---++--++------+--------+--+	35.1
cg00917003	7	ATG9B	-79.5274	16.396	-111.6636 , -47.3913	1.23e-06	--------+--++---------+----+	0
cg18843739	2	SDPR	-41.8521	8.62903	-58.765 , -24.9392	1.23e-06	----+---------+--+----+-----	48
cg01126162	10	FAM208B	70.1072	14.4571	41.7713 , 98.443	1.24e-06	+++++--+-++--++++++++-++++++	18.1
cg02991558	11	NNMT	59.693	12.3108	35.5638 , 83.8221	1.24e-06	+-++++++++++-+++++++++-+++-+	8
cg17018349	15	SKOR1	86.05	17.7447	51.2704 , 120.8295	1.24e-06	++++-++++++-++-+++-+++++++-+	39.5
cg10975863	14	RAD51B	54.303	11.2025	32.346 , 76.2599	1.25e-06	+++++-++++++++++++-+-+++++++	0
cg20682146	1	PBX1	42.0558	8.67615	25.0505 , 59.061	1.25e-06	++++-++++++++++++-+-++-+++++	4.8
cg22659049	4	LIMCH1	39.1679	8.07915	23.3327 , 55.003	1.25e-06	++-?+-+--+++++-+++-+-+++-+++	15.4
cg19954537	2	ARID5A	118.907	24.5361	70.8159 , 166.9976	1.26e-06	+++-+-++++++-+-?+++++-++++++	0
cg08067346	16	ARHGAP17	-48.2983	9.96923	-67.838 , -28.7586	1.27e-06	--++----------+?-+----------	19.5
cg22047282	2	EMILIN1	39.3416	8.12035	23.4257 , 55.2575	1.27e-06	++-?+-++++++++--++++-++++-++	30.5
cg02371935	16	ZCCHC14	69.1997	14.2909	41.1896 , 97.2099	1.28e-06	++++?--++?++-++++++++++-++++	43.4
cg13876650	1	MTFR1L	78.9724	16.3068	47.0111 , 110.9337	1.28e-06	+++++-+--+++++++++++-+-++--+	0
cg25479097	13	ATP11AUN	-53.8857	11.1285	-75.6975 , -32.0739	1.28e-06	--++-----------?-----+------	0
cg11936311	5	RUFY1	-82.2254	16.9838	-115.5136 , -48.9372	1.29e-06	-+--+--+----+-----+---+-----	10.5
cg16479633	8	ATP6V1B2	-38.6085	7.97361	-54.2368 , -22.9802	1.29e-06	-+----------++++-+----+-+---	15.1
cg01930756	5	VTRNA2-1	-66.0432	13.6449	-92.7872 , -39.2992	1.3e-06	---++------++-----+-+---+--+	10.5
cg05960938	12	CTDSP2	-38.6259	7.98433	-54.2752 , -22.9766	1.31e-06	--------++-+--+------------+	34.7
cg00974255	17	MRM1	-46.7038	9.65917	-65.6357 , -27.7718	1.33e-06	-----------+--+-------+--+-+	45.8
cg12315311	19	VSTM1	-46.1024	9.53328	-64.7876 , -27.4172	1.33e-06	+-+-?-----+-+-------+-------	0
cg23898497	8	PVT1	-73.769	15.2554	-103.6696 , -43.8684	1.33e-06	----+------+--++----+-------	30.5
cg16308841	2	CNOT11	51.4615	10.6446	30.598 , 72.325	1.34e-06	+++++-++-+++--++++-+--+++-++	0
cg23844904	1	SDC3	-52.5322	10.867	-73.8316 , -31.2328	1.34e-06	----?---------+--+--+-------	0
cg14752965	17	RAI1	75.7317	15.6741	45.0104 , 106.4529	1.35e-06	++++++++++++++--++-+++--++++	0
cg17500228	5	EXOC3	37.8433	7.83163	22.4933 , 53.1933	1.35e-06	+++-++++++-++++++-++++++++-+	16.2
cg02010963	16	UBALD1	64.1082	13.2687	38.1014 , 90.1149	1.36e-06	-+--++++++++-+++++++-+-+--++	43.6
cg08196561	16	ZCCHC14	29.0951	6.02203	17.2919 , 40.8982	1.36e-06	+++---++-+++-+++++++--++++-+	35.2
cg25952104	14	ELMSAN1	51.4786	10.6569	30.591 , 72.3661	1.36e-06	+++?++-+++++++-?+++++-++++++	0
cg03287519	8	OXR1	-35.7848	7.40883	-50.3061 , -21.2635	1.37e-06	--+--+--+--+--+---+---?---?-	24.9
cg01231543	16	CDH3	-59.635	12.3511	-83.8431 , -35.4268	1.38e-06	---------+-+--+?-------+----	24.3
cg01329973	16	FOXL1	113.016	23.41	67.1327 , 158.8998	1.38e-06	++-++++++++++++++++++++-+++-	0
cg04023204	16	PLA2G15	-71.9554	14.9036	-101.1664 , -42.7444	1.38e-06	--++----+---+------+-+------	38
cg16409562	14	NDRG2	-47.6653	9.87407	-67.0185 , -28.3121	1.38e-06	--+-+-+----+-++------++-++-+	24.2
cg07611843	7	CCDC136	-46.9787	9.73251	-66.0544 , -27.903	1.39e-06	----+-----------------------	0
cg14207833	19	UPF1	46.1326	9.55864	27.3976 , 64.8675	1.39e-06	+-+-++++-+++++++++-+++---+-+	28.2
cg21457401	6	PNLDC1	24.093	4.9924	14.3079 , 33.8781	1.39e-06	++-+++++++++++-+++-+-+++++++	8.5
cg06822690	1	ADGRL2	-58.7869	12.1856	-82.6706 , -34.9033	1.41e-06	-----+-++--+--------+-+-----	7.8
cg16090599	11	PRDM11	-79.4231	16.4694	-111.7031 , -47.1431	1.42e-06	-------------++---+---+----+	0
cg01520924	14	HSPA2	-73.495	15.2454	-103.3759 , -43.614	1.43e-06	-----------+------+--++-----	0
cg22182666	17	TSPOAP1	61.5468	12.7685	36.5206 , 86.573	1.43e-06	+++++++++-+--+++++++---++--+	23.6
cg24247370	13	STK24	-62.6377	12.992	-88.1021 , -37.1734	1.43e-06	---+-+-----++--?-----+-----+	24
cg26300517	4	KLF3	73.4017	15.228	43.5549 , 103.2486	1.43e-06	++++-++-++++-++?++-+++-+++-+	40
cg04252203	3	XXYLT1	-45.7679	9.5001	-64.3881 , -27.1477	1.45e-06	-----------+++----------+--+	0
cg09912552	8	NDRG1	-46.4529	9.64231	-65.3518 , -27.554	1.45e-06	-+----+-+--+---?-----+--++-+	35.5
cg25741837	2	SMYD5	50.5158	10.4866	29.962 , 71.0696	1.46e-06	-++-+--+-++++++-+++++++-++++	40.1
cg13150925	12	ZNF664-FAM101A	32.9707	6.84678	19.551 , 46.3904	1.47e-06	++++?++++++--+-++++++++-++++	33.5
cg00277714	13	LINC00297	-47.0048	9.76449	-66.1432 , -27.8664	1.48e-06	----+------++--?-+--+-+----+	19.4
cg02689489	10	ZNF438	92.445	19.2008	54.8114 , 130.0786	1.48e-06	++-+++-+++++-+-?++--+++++-++	25.3
cg03682712	15	LOXL1-AS1	83.3373	17.3092	49.4113 , 117.2633	1.48e-06	++-++-+++-++++-?++++-+++--++	55.2
cg03725573	11	ZBTB16	74.1223	15.3964	43.9453 , 104.2993	1.48e-06	+--++++++++++++-++++++++++-+	21.6
cg07453778	6	MAP3K7	-75.4584	15.675	-106.1814 , -44.7354	1.48e-06	-----------------+--+-+-----	0
cg16301617	17	TMC8	71.279	14.8084	42.2546 , 100.3034	1.48e-06	++---++++++---++++++--+-+-++	56.5
cg09982224	11	ALDH3B1	-48.095	9.99454	-67.6843 , -28.5057	1.49e-06	----------++-----++-----+--+	37.8
cg21806015	7	NXPH1	85.3793	17.7383	50.6122 , 120.1465	1.49e-06	+++++-++++-+--++-++-++++++++	0
cg00836308	1	TEKT2	42.5644	8.84747	25.2234 , 59.9055	1.5e-06	+++++++--+++-+-?++-+++++-+-+	0
cg15031685	7	FLNC	-66.3563	13.7928	-93.3901 , -39.3225	1.5e-06	------------+--?--------+--+	8.9
cg26092233	2	LOC150935	64.7092	13.4502	38.3469 , 91.0716	1.5e-06	+++++++++++++++-+-+++++-++++	33.5
cg26670249	19	PRKACA	65.9267	13.7041	39.0667 , 92.7867	1.5e-06	++++++++-+++--++++++-++-+-++	16.4
cg10908196	16	MGRN1	49.7177	10.3358	29.4596 , 69.9759	1.51e-06	+-++++++++++-+++++-+-+++++-+	0
cg00637802	12	CFAP73	-106.885	22.2306	-150.4574 , -63.3135	1.52e-06	+---?------+---+--+-++----+-	0
cg03552937	7	ZMIZ2	68.3677	14.223	40.4906 , 96.2448	1.53e-06	+-++++++-++++++?++++--+-++-+	5.7
cg06977285	7	HDAC9	53.9912	11.2322	31.976 , 76.0064	1.53e-06	++++++++++++++--++++---+++-+	0
cg07011538	2	C2orf61	-74.7813	15.5565	-105.2721 , -44.2905	1.53e-06	----------+-+--?-----+--+---	35.7
cg17112975	17	SEPT9	74.7199	15.5426	44.2563 , 105.1834	1.53e-06	++++?+++++---++-++++-++-++++	48.1
cg21321372	4	SCOC	-30.4832	6.34146	-42.9125 , -18.0539	1.53e-06	+--------?--+-+---+---------	25.3
cg04956801	10	SKIDA1	34.4134	7.15975	20.3803 , 48.4465	1.54e-06	++++-++++++++++?+++++-++++++	46.9
cg10721220	8	FAM183CP	-47.3529	9.85227	-66.6633 , -28.0424	1.54e-06	--+-----+---+-+-----+-+-----	21.2
cg16286925	5	FER	-58.588	12.1897	-82.4798 , -34.6963	1.54e-06	----?-------+-+--++-+-++----	7.5
cg16847428	4	SMIM20	41.1019	8.55596	24.3322 , 57.8716	1.56e-06	+++++-++-+++-+++++-+++--++++	23.9
cg17092099	12	CHFR	37.8513	7.87973	22.4071 , 53.2956	1.56e-06	++++-+++++++-+--++-++-++++-+	45.1
cg18502099	17	CBX4	-79.5631	16.5629	-112.0263 , -47.0999	1.56e-06	--+-?------------+-+--------	2
cg01401327	7	CUX1	-42.9922	8.95267	-60.5395 , -25.445	1.57e-06	-++-+---------+?--+-+------+	39.6
cg02349468	5	SLC12A7	-26.7116	5.56182	-37.6128 , -15.8104	1.57e-06	---+--+------------?--------	35.5
cg05941027	17	LIMD2	58.8784	12.2593	34.8502 , 82.9066	1.57e-06	+++++++++++--++-++++++++++++	0.7
cg02098619	1	RERE	78.3695	16.3237	46.3751 , 110.3639	1.58e-06	++-??++++++--++++++++-+-+-++	59.9
cg07219769	22	LGALS1	-39.1489	8.15372	-55.1302 , -23.1676	1.58e-06	-++?+----+-++----+-+-+?---?-	35.1
cg17353412	7	HOXA2	55.1539	11.4877	32.6381 , 77.6697	1.58e-06	++++?-++-+++++++++++++-+-+++	19.3
cg25377915	8	CDH17	-36.1627	7.53306	-50.9275 , -21.3979	1.58e-06	----+----------+------+-----	0
cg08801887	11	TCIRG1	63.5142	13.2326	37.5784 , 89.45	1.59e-06	+++-+-+++-++-+++++-++-++-+-+	46.9
cg22121941	22	MIRLET7BHG	54.447	11.3443	32.2122 , 76.6818	1.59e-06	+++++-+++++--+-+++-+++-++--+	29.6
cg22379463	3	TMEM158	-60.5993	12.627	-85.3481 , -35.8504	1.59e-06	------++---+--+?-+---+-+----	28.5
cg01081636	6	GRM4	63.8573	13.3083	37.773 , 89.9416	1.6e-06	+--++-+-+++-+++?++++++-+++-+	17.7
cg07110659	1	LPAR3	-44.8546	9.34668	-63.1741 , -26.5352	1.6e-06	----+--+--++--+?-+----+-----	46.7
cg09507934	7	ORAI2	63.4155	13.2144	37.5153 , 89.3158	1.6e-06	-++++++++++--++++++++-++++++	0
cg12648297	15	PLEKHO2	-65.7565	13.7044	-92.6171 , -38.8958	1.6e-06	---?-+-------++------------+	42.4
cg14104280	10	SH2D4B	-44.9899	9.37524	-63.3654 , -26.6144	1.6e-06	----?-----+---------+----+--	27.8
cg02913194	6	PHACTR2	-63.7226	13.2844	-89.76 , -37.6852	1.61e-06	-----+--+---+-+---+---------	0
cg17044311	10	ABCC2	-52.708	10.9875	-74.2436 , -31.1725	1.61e-06	-----+---+----++-----+++---+	0
cg18574254	7	GRM8	-47.5543	9.91429	-66.9863 , -28.1223	1.61e-06	--++-----------+----+-+---+-	21.7
cg19704630	17	ATP2A3	-69.2014	14.4255	-97.4753 , -40.9275	1.61e-06	----?-------+--------+-+----	0
cg02905900	1	ACOT11	-83.5676	17.4245	-117.7197 , -49.4155	1.62e-06	-------+----+-++-----------+	0
cg22180580	6	NHSL1	55.283	11.5276	32.6889 , 77.8771	1.62e-06	+++++++++++-+-+-+++--+--++++	19.7
cg26647771	5	NPR3	-60.5569	12.6291	-85.31 , -35.8038	1.63e-06	------------+-+---+-+--+----	43.3
cg14838757	1	XPR1	-45.3993	9.47171	-63.9639 , -26.8348	1.64e-06	--+??---------+---+-+--+----	0
cg05411199	6	PXDC1	43.3043	9.03593	25.5939 , 61.0148	1.65e-06	++-+++++++++++++++-+-+-+++-+	32
cg19187682	20	SOX18	51.2279	10.693	30.2697 , 72.1862	1.66e-06	+---+++++++-++---+++++-++-++	9.8
cg01886663	17	RPTOR	-78.5922	16.4101	-110.756 , -46.4284	1.67e-06	---??------+---?----+------+	0
cg04864592	10	TLL2	-71.3646	14.8979	-100.5645 , -42.1647	1.67e-06	---------?---++--------+----	24
cg23204276	22	AP1B1	91.646	19.1336	54.1441 , 129.1479	1.67e-06	++++++++-++--+--++-+-+-+++-+	14.4
cg13875033	1	PRDM16	-46.0539	9.61911	-64.9073 , -27.2004	1.69e-06	-------+---+--+-------------	18.5
cg21644578	1	ESPNP	-90.3854	18.8816	-127.3933 , -53.3775	1.69e-06	------------+-----+-+++---+-	0
cg02192281	13	SUCLA2	-70.5486	14.7415	-99.442 , -41.6552	1.7e-06	---+?+--+------------++-+---	48.6
cg12847502	2	ZFP36L2	49.5934	10.3616	29.2845 , 69.9022	1.7e-06	+++++-+++++-++++++++--++-+++	0
cg27118035	16	ZNF267	-42.1915	8.81825	-59.4753 , -24.9078	1.71e-06	--+------------?-++---------	1.2
cg17298925	5	MIR4278	-22.0691	4.61315	-31.1109 , -13.0273	1.72e-06	-----+--+--+-++--++---+----+	30.3
cg17725472	1	CHIT1	62.4048	13.0451	36.8365 , 87.9731	1.72e-06	++++--+-+++-+++-++++-++++++-	27.3
cg18047920	8	NAPRT	53.0939	11.0993	31.3393 , 74.8485	1.72e-06	+++++++++++-++++++++-+-++--+	0
cg21822187	12	HMGA2	-39.0114	8.15547	-54.9961 , -23.0267	1.72e-06	-----++----+---?-++--+++----	57.9
cg22153728	1	RUNX3	52.0591	10.8843	30.726 , 73.3923	1.73e-06	+--+-+++++++-+-++++++-+++-++	0
ch.1.159013533R	1	LY9	-126.63	26.4746	-178.5203 , -74.7399	1.73e-06	++--?------+++?---+--------?	0
cg08506869	8	SPIDR	36.4174	7.61582	21.4904 , 51.3444	1.74e-06	++++++++++++++++++++++--++++	0
cg02812482	19	MIR181C	-62.5311	13.0834	-88.1746 , -36.8877	1.76e-06	-------+---------++--++----+	45.9
cg04345034	15	UACA	-63.0461	13.193	-88.9043 , -37.1878	1.76e-06	-------+---+-+---++---+----+	36.7
cg12301696	11	MIR4686	82.928	17.3512	48.9196 , 116.9365	1.76e-06	++++?++-+?++-++?+++++++-++++	9.2
cg15355015	7	SH2B2	-52.5415	10.9934	-74.0885 , -30.9945	1.76e-06	+-++-----+-----?------+-+--+	0
cg19194924	14	FOXN3	63.0067	13.183	37.1679 , 88.8454	1.76e-06	+++---+++++++++-+++++-+++--+	0
cg04689606	10	VWA2	-76.3276	15.9727	-107.634 , -45.0211	1.77e-06	---+--+-----+----+----------	43.6
cg05859076	3	ISY1-RAB43	45.8815	9.60537	27.0549 , 64.708	1.78e-06	++++-+++-+++--++++-++++---++	16.2
cg07208825	2	ALMS1P1	53.9754	11.2995	31.8284 , 76.1225	1.78e-06	+++++-++-+++-+++++++-+++++-+	0
cg15580355	3	MCF2L2	-71.9146	15.0555	-101.4234 , -42.4059	1.78e-06	--------------+---+-+-+-+---	26
cg26474124	2	C2orf42	41.0785	8.5983	24.2258 , 57.9312	1.78e-06	+---?+++++++--+-++++++++++++	26.9
cg03217115	2	INSIG2	-55.0352	11.5228	-77.6199 , -32.4505	1.79e-06	--+?---+-------+-+----+-+---	1.7
cg04822495	12	PLXNC1	53.8954	11.2852	31.7764 , 76.0145	1.79e-06	+++-+++++++--++++++++++-++++	21.1
cg13547237	11	DRAP1	72.2281	15.1223	42.5884 , 101.8677	1.79e-06	+++++++++++--++-++++----+--+	33.3
cg24030173	19	GRIN2D	-93.0086	19.4729	-131.1755 , -54.8417	1.79e-06	-+-----------++--++-+-+----+	17.8
cg00741986	4	TNIP2	59.5438	12.4715	35.0997 , 83.9879	1.8e-06	++++-++-+++-+++?++++-+-+++-+	24.5
cg17114584	11	IRF7	40.7058	8.52797	23.991 , 57.4206	1.81e-06	++-+++-++++++++++++++-+-++-+	0
cg20251225	1	CDK11B	47.9672	10.0492	28.2709 , 67.6636	1.81e-06	++-+++++++++++--+++++-+++++-	36.8
cg01789926	16	C16orf91	-44.0707	9.23785	-62.1769 , -25.9645	1.84e-06	--++--+---+-++-+-+-----+----	27.8
cg04431935	16	UNKL	41.8075	8.76402	24.6301 , 58.985	1.84e-06	+++-+-+++++-+++-+++--++--+++	41.5
cg03450635	4	FAM198B	54.5716	11.4436	32.1421 , 77.0012	1.85e-06	++-+-+++-++++++-+++++--+-+++	7.5
cg09882118	3	ATRIP	66.0365	13.8461	38.8982 , 93.1748	1.85e-06	++-+++++-++++++?++++---+++++	40.6
cg12028936	4	RAP1GDS1	-107.749	22.5904	-152.0264 , -63.4721	1.85e-06	--+---------+-+----+-----+--	37.2
cg26632875	12	FAM234B	-52.9604	11.1047	-74.7256 , -31.1952	1.85e-06	---?-----+--+-+?--+-+-+----+	45.4
cg01311102	9	PTGES2	50.7769	10.6547	29.8937 , 71.6601	1.88e-06	++-+-++++++--+++++++-+--++++	33.9
cg08106887	12	HOXC4	-46.8911	9.83853	-66.1746 , -27.6076	1.88e-06	---+?--+-------------++----+	0
cg06913219	20	NINL	-59.264	12.4406	-83.6476 , -34.8803	1.9e-06	---------+-++-----------+---	0
cg19041419	4	KIT	49.9078	10.4765	29.3738 , 70.4417	1.9e-06	+-+--++--+++-++++++++-++-+++	48.8
cg06755438	2	CFAP65	-43.2507	9.08163	-61.0507 , -25.4507	1.91e-06	----?-------+----++--+------	30.8
cg27440834	3	SNX4	-60.712	12.753	-85.7079 , -35.716	1.93e-06	---?+++-----+-+--+--+-+-----	39
cg22307974	2	RHOQ	-59.4902	12.4998	-83.9899 , -34.9906	1.94e-06	----?----------+-++--++-----	3.2
cg17181255	12	PLEKHG6	-55.9265	11.753	-78.9623 , -32.8907	1.95e-06	--++-------++--?-+-+--------	12.7
cg24650940	5	ZNF608	-58.0424	12.1974	-81.9493 , -34.1355	1.95e-06	-------+----++++------------	29.6
cg25314284	11	MIR4300	-28.9337	6.08228	-40.855 , -17.0124	1.96e-06	---------++-+---------+----+	39.1
cg00130342	17	DNAI2	40.7826	8.57372	23.9781 , 57.5871	1.97e-06	+++-?+++++++++++++++++-+++-+	0
cg04999945	16	CIITA	-67.3844	14.1668	-95.1512 , -39.6175	1.97e-06	-----------+---+-++------+--	0
cg05235344	6	ADTRP	-56.4996	11.8794	-79.7832 , -33.216	1.97e-06	--+-------+------+-----+----	32.7
cg06761850	14	TECPR2	46.7686	9.83543	27.4912 , 66.0461	1.98e-06	++-?+++++++++++?++++++-++-++	0
cg02384911	17	ABR	65.156	13.7052	38.2937 , 92.0183	1.99e-06	+++++++++++++--++-++-+-+++-+	8.6
cg07243366	12	AEBP2	-43.3214	9.11242	-61.1818 , -25.4611	1.99e-06	--+---------++---++---+-----	15
cg07676709	17	HOXB-AS3	46.4043	9.75946	27.2757 , 65.5328	1.99e-06	++-+-+++++-+++++++++-+-+++-+	0
cg22809683	1	LAMC1	-43.1386	9.07392	-60.9235 , -25.3537	1.99e-06	----?----------+--+---++---+	33.8
cg23511285	19	GLTSCR1	58.2534	12.2524	34.2388 , 82.2681	1.99e-06	---?+-+++++--+++++++-+-+++-+	36.9
cg05527044	2	EGR4	88.1055	18.5347	51.7775 , 124.4336	2e-06	++++?+-+++++++++++++-+++---+	39.1
cg12562828	11	CDC42EP2	-60.2252	12.6701	-85.0587 , -35.3917	2e-06	----+---+------------+-----+	26.7
cg13306815	6	MIR3668	-102.812	21.6317	-145.21 , -60.4136	2.01e-06	----?-------+----+----++----	42
cg19358520	11	SLC22A6	-55.2132	11.6206	-77.9896 , -32.4369	2.02e-06	-+-+-+-----+--------+-+----+	4.9
cg09264489	1	PLEKHA6	-59.6818	12.5623	-84.304 , -35.0597	2.03e-06	--+-?----------?------------	7.4
cg04714110	10	SKIDA1	47.1971	9.93807	27.7184 , 66.6757	2.04e-06	++-+++++++--++-++++++-++++++	0
cg06648780	3	ALCAM	-60.1847	12.6719	-85.0217 , -35.3477	2.04e-06	-+-+--------+-++-+--+-------	45
cg10847094	4	FGFBP2	85.6949	18.0437	50.3293 , 121.0606	2.04e-06	---++++++++--+--+++---++++++	2.4
cg10194884	16	PRSS21	-54.5474	11.4896	-77.067 , -32.0277	2.06e-06	----++---------+-----++-+---	33.7
cg13389502	17	HIC1	-39.4051	8.30184	-55.6768 , -23.1335	2.07e-06	+-+----+----+---------+---+-	13.5
cg13423770	1	RHBG	-70.6355	14.886	-99.8121 , -41.4589	2.08e-06	----------+++--?-----+------	12.5
cg03043157	6	FHL5	-47.8026	10.0747	-67.549 , -28.0562	2.09e-06	--+--------++--?-+---------+	13.1
cg13933080	10	SPAG6	82.5228	17.3946	48.4294 , 116.6163	2.09e-06	++-++-++-++++++?++++-+-+-++-	3.7
cg12528056	11	PTGDR2	118.894	25.064	69.7684 , 168.0192	2.1e-06	++++-++++++-++++++-++-++++++	33.5
cg21769619	11	WT1	-83.5165	17.6054	-118.0231 , -49.0099	2.1e-06	---+-+------+++---+-----+-++	0
cg01556706	3	FHIT	-44.9335	9.47442	-63.5034 , -26.3637	2.11e-06	-------+-------?-++---++-+--	57
cg03935116	12	FAM60A	138.019	29.1015	80.9804 , 195.0582	2.11e-06	-+++-+++-+++++-+++++++++++++	0
cg04384031	17	SLC47A2	-62.3529	13.1504	-88.1276 , -36.5781	2.12e-06	-------+---------++---+-----	13.1
cg04629512	7	C7orf50	58.0393	12.2396	34.0497 , 82.0289	2.12e-06	+++++-+++++-+-+-++-+-++++--+	3.3
cg10799327	3	CLDN11	-56.7912	11.9792	-80.2705 , -33.312	2.13e-06	----?--++----++-----+-+-----	0
cg10878966	21	PCNT	-64.6696	13.6412	-91.4063 , -37.9329	2.13e-06	---++-----+----?-------+----	26.2
cg24246360	6	IBTK	-70.8036	14.9352	-100.0766 , -41.5305	2.13e-06	--+-?---------+------+------	0
cg09233395	8	TRPS1	-36.9978	7.80521	-52.296 , -21.6995	2.14e-06	--+----++---+--?-++-++------	27.5
cg09526022	11	NRXN2	87.6514	18.4955	51.4002 , 123.9026	2.15e-06	+++++-+++++--+-+++-+-+---+--	39.1
cg10828401	19	PTBP1	98.325	20.7516	57.6518 , 138.9982	2.16e-06	++-+++++--++++++++++-+---+++	41.2
cg19755435	14	GPR65	-40.0965	8.4632	-56.6844 , -23.5087	2.16e-06	---+-----+-++-++----+-+-+---	31.2
cg24524470	1	EFCAB2	-30.6932	6.47822	-43.3906 , -17.9959	2.16e-06	+-+--------+--+-------?---?-	19
cg07069844	19	TCF3	73.3244	15.4805	42.9826 , 103.6662	2.17e-06	-+++?++++--+++-++++++++++++-	19.1
cg07652447	8	TOP1MT	42.6763	9.00905	25.0186 , 60.334	2.17e-06	+++??+-+++++++-?+++++++++--+	35.2
cg05575505	15	ASB7	-41.4329	8.74786	-58.5787 , -24.2871	2.18e-06	------+-----+-------------++	20.7
cg06801857	1	GALNT2	62.8713	13.2776	36.8471 , 88.8954	2.19e-06	+++++++-+-++-+++++++++--++++	28.8
cg12301814	19	NR2F6	-48.9772	10.3441	-69.2518 , -28.7027	2.19e-06	----+-+---+++----+----------	53.2
cg20291222	12	CAPS2	-40.4443	8.54081	-57.1843 , -23.7044	2.19e-06	--+---------+--?----+-+-----	7.9
cg27059598	10	SKIDA1	83.4699	17.6296	48.9159 , 118.024	2.19e-06	+++++-+++++++++?-+-+++-+++-+	9.9
cg06367607	6	ATG5	-62.8261	13.2712	-88.8377 , -36.8146	2.2e-06	----+---------++-+---+-+----	29.2
cg16726039	12	CHFR	24.4789	5.17041	14.3449 , 34.6129	2.2e-06	+++++-+++++-----++----++++-+	3.4
cg04340651	15	RGMA	-42.5026	8.97957	-60.1025 , -24.9026	2.21e-06	----------+---+?-++-----+---	20.8
cg05136531	2	THUMPD2	-43.7977	9.25276	-61.9331 , -25.6623	2.21e-06	-------+---+---?-----++--+--	12.4
cg10775230	3	TMIE	-86.2093	18.2199	-121.9203 , -50.4983	2.23e-06	--------------+?-+-----+----	41.5
cg12640049	1	IGSF21	42.1225	8.90262	24.6733 , 59.5716	2.23e-06	+++?+++-++++++++++-++-+++-+-	24.8
cg19645534	11	SESN3	52.1029	11.0119	30.5196 , 73.6861	2.23e-06	+++-+++++++--++++++-++++++++	0
cg21538208	4	MSX1	41.0473	8.67502	24.0443 , 58.0504	2.23e-06	+--++++++++-+++?+++-+-++-+++	14.2
cg07679370	2	TEX41	-70.5746	14.9194	-99.8165 , -41.3326	2.24e-06	----------+-+-+?-----+-+----	0
cg21284779	1	RXFP4	65.5028	13.8468	38.363 , 92.6426	2.24e-06	+-++++-++++++++-++++++-++-++	13.6
cg01833890	12	CACNA1C	91.9901	19.4482	53.8716 , 130.1085	2.25e-06	++-+?-++++++-++-++-++++-++-+	41.9
cg15085883	12	MDM1	-28.8114	6.09147	-40.7506 , -16.8721	2.25e-06	--+----+----+-----+---------	0
cg24376793	1	PPP1R12B	-77.8992	16.4715	-110.1833 , -45.615	2.25e-06	---++---+-----++----++++-+--	19.2
cg01607269	2	ZFP36L2	81.4509	17.2272	47.6856 , 115.2162	2.27e-06	++++++-+++++--++++---+-+-+-+	0
cg17724184	8	C8orf44-SGK3	-38.8927	8.22626	-55.0162 , -22.7692	2.27e-06	-----------++--?-++-+-------	24.8
cg06779553	8	TOX	-44.8042	9.47904	-63.3831 , -26.2253	2.28e-06	---+----+-----+?------------	1
cg20366479	2	IGFBP2	-29.9346	6.33364	-42.3486 , -17.5207	2.29e-06	-+-+--------+-+------+--++--	24.8
cg15577373	2	PPP1R21	-58.7331	12.4291	-83.0941 , -34.3721	2.3e-06	----+-------+-+--++---+----+	38.5
cg04037585	16	GNAO1	39.0146	8.25761	22.8296 , 55.1995	2.31e-06	+++++++-+++-+-+?++++++++-+++	0
cg05567511	7	WDR86-AS1	-35.9269	7.60536	-50.8334 , -21.0204	2.31e-06	---++------+--+-----+++--+--	13.5
cg11360689	3	ALAS1	-56.4377	11.9493	-79.8584 , -33.0171	2.32e-06	--------++-+-++-------+----+	35.4
cg18801311	12	PLEKHG6	-69.7149	14.7608	-98.646 , -40.7838	2.32e-06	---+-+-----++-+------++--+--	0
cg14446712	2	SDPR	-83.0407	17.5832	-117.5039 , -48.5776	2.33e-06	-------------+++------+-----	0
cg19599611	15	AQR	-42.1341	8.92163	-59.6205 , -24.6478	2.33e-06	-----+--------+---++--+-----	2
cg18221226	12	NCOR2	-60.0365	12.7155	-84.9588 , -35.1141	2.34e-06	--+++-------+--?----++--+---	54.4
cg18390959	19	CLDND2	85.4983	18.1066	50.0094 , 120.9871	2.34e-06	+-+++-+++-+-+++?++++--++++++	0
cg10952190	1	PTPN14	-56.9495	12.0666	-80.5999 , -33.299	2.36e-06	-----+-+--+---+?--+--+------	0
cg12539124	6	CASC15	-41.4258	8.77734	-58.6294 , -24.2222	2.36e-06	---??--?+-----??--?---??---+	0
cg07478335	11	NLRX1	-256.851	54.4333	-363.5405 , -150.1617	2.37e-06	-++-+-------+----++-++++----	7
cg13315706	21	ITGB2	56.5965	11.9927	33.0909 , 80.1022	2.37e-06	++++++++++-----?++++++++++++	45.8
cg00701951	10	HTRA1	-56.221	11.9158	-79.5759 , -32.8661	2.38e-06	-----++----+-+-?--+---+----+	23.7
cg22390040	8	MTMR7	39.2239	8.31406	22.9284 , 55.5195	2.38e-06	++++++++-++-+++++++-++++++-+	0
cg05222924	11	WT1	-77.4443	16.4175	-109.6227 , -45.2659	2.39e-06	---+-+-++---+-----+-----+-++	0
cg06342416	21	TRPM2	82.2917	17.443	48.1035 , 116.48	2.39e-06	+--??+++++++-+++++++-++-++++	7.2
cg10790672	5	BHMT2	42.8357	9.08118	25.0366 , 60.6349	2.39e-06	++-+-++++++--+-+++--++++++++	29.6
cg06611426	12	GRASP	40.5106	8.58952	23.6751 , 57.346	2.4e-06	+++-++-+-++-+++?-+++-+-+-+-+	26.1
cg06670039	16	SNX29	67.4959	14.3142	39.4401 , 95.5517	2.41e-06	++++-++++++--++-+++-++--+-++	42.7
cg24024661	19	ARHGAP45	-44.7182	9.48373	-63.3063 , -26.1301	2.41e-06	-----+-----+--+?-+-----+---+	39.8
cg03043406	1	RPS8	38.6978	8.20771	22.6107 , 54.7849	2.42e-06	++++--+++-+-++++++++------++	22
cg06084210	13	SLC10A2	-72.9643	15.4837	-103.3124 , -42.6162	2.45e-06	-+-+-------++--+-+----------	0
cg25144207	4	MSX1	54.8984	11.6513	32.0618 , 77.7349	2.46e-06	+--+?+++++++++++++++++-+++++	0
cg03131767	12	ABCB9	-54.0372	11.4718	-76.5219 , -31.5525	2.47e-06	--++------+-+-+?-+---+-+---+	27.1
cg05614346	5	GRK6	42.8657	9.10198	25.0258 , 60.7056	2.48e-06	+--+++-++++--++-++++++++++++	39.7
cg17185267	4	TBC1D1	69.8708	14.8345	40.7952 , 98.9465	2.48e-06	++++-++++++--+++++-+++-++--+	0
cg18599081	3	CCRL2	-51.3656	10.907	-72.7434 , -29.9878	2.48e-06	----+---+-----+---+-+++-++--	0
cg01738984	11	MRGPRG-AS1	71.2899	15.1401	41.6153 , 100.9645	2.49e-06	+-+++-+++++-+++++++-----++++	36.5
cg15175129	12	MSRB3	-52.4965	11.1489	-74.3483 , -30.6447	2.49e-06	+----------++-----------+---	0
cg07824081	16	BOLA2	-70.3072	14.9327	-99.5753 , -41.0392	2.5e-06	--+-+-----+-+--------+-+----	39.2
cg06159340	16	CTF1	43.0386	9.14381	25.1168 , 60.9605	2.52e-06	+++++++++++++++?++++---+-+++	0
cg08136416	21	PDE9A	-51.379	10.9156	-72.7736 , -29.9845	2.52e-06	--+-------+-+-+-----------+-	0
cg10096040	14	EVL	-48.737	10.3552	-69.0332 , -28.4408	2.52e-06	+---+------++-+?-++-+-------	40
cg12342675	10	BICC1	-47.5903	10.1116	-67.4089 , -27.7716	2.52e-06	----?+--------+?-++-+--+----	27.6
cg05014660	22	PARVG	-86.9341	18.4764	-123.1479 , -50.7204	2.54e-06	----?----?---+----+-+-------	17
cg15413523	5	TCF7	51.8836	11.0291	30.2666 , 73.5006	2.55e-06	+-++++-++++-++++++-++++---++	11.9
cg25123427	3	WDR48	-44.8237	9.53014	-63.5028 , -26.1447	2.56e-06	--+-?---+---+++---+-+-+--+--	35.4
cg02212855	10	PRAP1	-94.0752	20.0042	-133.2835 , -54.867	2.57e-06	+--++----------+-----------+	0
cg06189670	12	STX2	50.7903	10.8008	29.6208 , 71.9598	2.57e-06	++++++-+++++++--++-+++++++-+	22.1
cg10763483	13	TEX26-AS1	51.521	10.9587	30.042 , 73	2.58e-06	++++++++++++++-+++++----+-++	0
cg02743256	7	MAD1L1	67.2629	14.3073	39.2205 , 95.3053	2.59e-06	++++++++-++-+++-++---+++++-+	39
cg14640509	2	THADA	65.1577	13.8657	37.9809 , 92.3345	2.61e-06	+-++---+-++-++--++++++-+++?-	39.3
cg23367341	5	STK10	31.9885	6.80737	18.6461 , 45.331	2.61e-06	+++??--++++++++--++++--+-+?+	27.1
cg08404225	3	IL5RA	-41.8385	8.90563	-59.2935 , -24.3834	2.63e-06	----+-------+-+--+--+-+-----	6.9
cg15146567	3	ZNF662	-53.542	11.3974	-75.8809 , -31.2031	2.63e-06	---+++------------+---+-----	36.5
cg04904469	8	HTRA4	-106.445	22.6638	-150.8657 , -62.0236	2.64e-06	---?------+----+----+++--+--	12
cg21020871	13	EPSTI1	35.5584	7.56986	20.7215 , 50.3953	2.64e-06	++++--++++++-++-++++++++++++	0
cg00147286	16	MTSS1L	47.8358	10.1891	27.8652 , 67.8063	2.67e-06	+++++-+-++++-+++++-++-++++-+	24.4
cg08140459	14	LTBP2	-70.9612	15.1148	-100.5862 , -41.3363	2.67e-06	---+--------+-+----+-+------	0
cg02736280	17	WDR81	-54.5926	11.6305	-77.3884 , -31.7969	2.68e-06	---++-------+-++-+-+---+----	38.4
cg24894783	5	ANKRD33B	-41.7087	8.88601	-59.1253 , -24.2921	2.68e-06	--+-------------------+-+--+	11.8
cg19688761	10	PTPRE	-63.7901	13.5939	-90.4342 , -37.1461	2.7e-06	---+------+++++----+--+-----	13.3
cg02152631	8	KIF13B	73.4382	15.6547	42.7549 , 104.1215	2.72e-06	+-+++++-+++++++?++++++++++++	0
cg23012855	1	TOMM20	-77.1924	16.4558	-109.4458 , -44.939	2.72e-06	----++-------++?--+--++----+	57.8
cg27194211	17	SMTNL2	47.923	10.2184	27.8949 , 67.9511	2.73e-06	+++++++++++-++++++++-+--+--+	10.2
cg00665106	1	RPS10P7	-56.3138	12.009	-79.8515 , -32.7762	2.74e-06	-------+---+-++--+--+-+-+--+	12.7
cg09109411	5	PDE6A	-41.5435	8.85944	-58.908 , -24.179	2.74e-06	----++--+--+-----+---+--++--	12.8
cg07834396	10	MSRB2	-38.527	8.21864	-54.6355 , -22.4185	2.76e-06	----?+--------+--+----++---+	45.8
cg19135352	17	PIGL	-46.8634	9.99647	-66.4565 , -27.2703	2.76e-06	--++?-----+-+--?-+---+-+----	36.5
cg27091643	12	RASSF3	-96.9412	20.6775	-137.4692 , -56.4133	2.76e-06	--+-+--++---+++?-++---+----+	0
cg03759346	3	IL12A	-49.6824	10.5999	-70.4582 , -28.9066	2.77e-06	---?+----+-----?-++-++-+---+	54.7
cg04413853	17	C17orf64	46.8025	9.98648	27.229 , 66.376	2.78e-06	+++++-+++++++++?++-+-++++-++	34.2
cg21163444	12	ZNF385A	-50.7405	10.8271	-71.9617 , -29.5193	2.78e-06	---------+-+---?-+------+--+	38
cg13872005	2	LINC01114	30.6223	6.53553	17.8127 , 43.432	2.79e-06	+++?++++-+++++++++--+++-+-++	0
cg21756476	15	RORA	41.5712	8.87171	24.1826 , 58.9597	2.79e-06	+++-++++-++-+++++++++--+++-+	17.8
cg06186450	1	SHC1	59.0141	12.5993	34.3195 , 83.7087	2.81e-06	++++++++-?++-++?++++--+--+-+	29.5
cg08555866	16	TIGD7	-36.5966	7.81319	-51.9105 , -21.2828	2.81e-06	----+------+-+-+------+-----	27.3
cg13064897	8	ZFAT	-53.527	11.4303	-75.9304 , -31.1235	2.83e-06	++-+----------+?-+---+------	40.9
cg12987312	3	LOC100507389	-36.8332	7.86822	-52.2549 , -21.4115	2.85e-06	----?--+---+---------++----+	36.9
cg18473733	19	KLF2	55.1148	11.7724	32.0408 , 78.1888	2.85e-06	-+++++-++-++-+++++-+-++-++-+	0
cg01731783	14	ELMSAN1	66.9403	14.3037	38.905 , 94.9756	2.87e-06	+--++++-+++++-+-++-+++--+--+	34.7
cg11099375	17	ERN1	73.0841	15.616	42.4768 , 103.6914	2.87e-06	+++-+-+++++--+++++--++-+++-+	28.3
cg02926266	2	PARD3B	-57.3762	12.2624	-81.4106 , -33.3419	2.88e-06	-----+-+------+--++-+-+----+	29.1
cg14519997	9	NFIB	20.1514	4.30655	11.7106 , 28.5923	2.88e-06	+++++-++-+++++++++++--+-+-++	38.6
cg15175162	4	FBXL5	-35.199	7.52268	-49.9435 , -20.4546	2.88e-06	--+---------+--+--------+---	0
cg15555527	4	ANTXR2	23.8996	5.10738	13.8892 , 33.9101	2.88e-06	++-+-+++++++++-?+++++---++++	42.3
cg20945221	1	EYA3	-42.5556	9.09547	-60.3828 , -24.7285	2.89e-06	----?+----+---+-------+-----	0
cg00076653	4	C1QTNF7	-45.9477	9.82228	-65.1994 , -26.6961	2.9e-06	----------+++-+?-+--+-------	0
cg06736148	15	GNB5	-48.4083	10.349	-68.6924 , -28.1242	2.9e-06	----------+-+----+---+------	0
cg01107185	7	ZC3HAV1	-37.0485	7.92111	-52.5739 , -21.5231	2.91e-06	----++-----+--+?--+--+------	14
cg09757087	16	IFT140	38.124	8.15148	22.1471 , 54.1009	2.91e-06	++++?++++?++----+++++--+++-+	0
cg15891850	13	KLF12	-54.9442	11.7469	-77.9682 , -31.9203	2.91e-06	---+-------------++-+++-+---	36.6
cg04422625	8	FER1L6	-66.2906	14.1753	-94.0743 , -38.507	2.92e-06	--+-?------++-++------++----	42.9
cg07933378	8	SLC39A4	-40.7519	8.71413	-57.8316 , -23.6722	2.92e-06	--++--+----+---+---+-+------	18.8
cg17586988	18	TMEM200C	-30.6319	6.55061	-43.4711 , -17.7927	2.92e-06	+-------------+-------------	7.1
cg14521077	3	PLCL2	-54.8233	11.7246	-77.8036 , -31.8431	2.93e-06	--+-----------+?--+-+-+-----	0
cg16886828	19	KDM4B	56.8974	12.1685	33.0472 , 80.7477	2.93e-06	+++-+++++++---++++++++++++-+	51.3
cg10750934	19	NKPD1	61.7628	13.2111	35.869 , 87.6565	2.94e-06	--+++-+++++--++-++++-+++---+	51.4
cg11328127	11	SIGIRR	34.653	7.412	20.1255 , 49.1805	2.94e-06	+++--+++++++--+-++++---++--+	35.1
cg19727124	1	PLEKHG5	-73.8638	15.8029	-104.8375 , -42.8901	2.95e-06	---++----+-++--?-----+------	38.2
cg05515072	11	PRDM11	86.5043	18.5104	50.2238 , 122.7847	2.96e-06	++++?+++-++--++-++++--+++-++	4.1
cg19416570	19	ZNF274	-42.563	9.10691	-60.4125 , -24.7135	2.96e-06	+---+--------+-?------+--+--	0
cg13654525	11	KCNK7	39.5417	8.4614	22.9573 , 56.126	2.97e-06	++++++++++++-+--+++++-++++-+	0
cg15662251	1	PAQR7	59.4241	12.7159	34.501 , 84.3473	2.97e-06	+++--++++++-+++-++-+++++-+++	44.1
cg10524915	14	SERPINA1	-86.4528	18.5064	-122.7254 , -50.1803	2.99e-06	---+-------+---+----+-+----+	0
cg17816357	7	C7orf77	-47.6226	10.1948	-67.6044 , -27.6407	2.99e-06	+-++-------+---?------------	40.2
cg26682922	1	DMRTA2	-71.8886	15.3894	-102.0518 , -41.7255	2.99e-06	---+-+--+-----+-----+---+-+-	22.8
cg10435245	11	SPI1	-58.0197	12.423	-82.3688 , -33.6707	3.01e-06	----------+-+--+-------+----	23.5
cg14420519	9	EGFL7	69.6813	14.9207	40.4367 , 98.9258	3.01e-06	+++++-+++++++++-++++-+-+++-+	36.6
cg24736274	6	LINC01016	-60.3688	12.9257	-85.7031 , -35.0345	3.01e-06	-++---+------+-------++--+-+	0
cg11708721	1	PTGFRN	19.6674	4.21212	11.4117 , 27.9232	3.02e-06	++++++++++++--+++++++++++-++	0
cg12856114	7	CLDN4	-46.8575	10.0363	-66.5287 , -27.1864	3.03e-06	----+--++---+-+-----+------+	26.1
cg20297638	7	LFNG	-49.6139	10.6274	-70.4437 , -28.7842	3.03e-06	-----+----+-+-+------+------	4.1
cg12131208	17	C17orf64	34.8963	7.47593	20.2434 , 49.5491	3.04e-06	+++++-+++++++++?++-+-++++-++	42.3
cg13449368	8	CSGALNACT1	-46.2342	9.90554	-65.6491 , -26.8193	3.05e-06	--------+-----++-++---------	14.2
cg01003815	9	INSL6	-42.2753	9.06102	-60.0349 , -24.5157	3.08e-06	---+--------+-+---+-++++----	40.9
cg08987251	16	GOT2	-36.2779	7.77611	-51.5191 , -21.0367	3.08e-06	-----+--+--+--+------+----?-	12.8
cg20643029	21	CLDN14	54.5903	11.7004	31.6576 , 77.5231	3.08e-06	++-+++++++++++++-++++-+-++++	16.1
cg16293569	11	KCNQ1	-52.2289	11.1957	-74.1725 , -30.2854	3.09e-06	---?--+-+-+-+-+----+--------	8
cg08810397	16	CLCN7	38.6596	8.28822	22.4147 , 54.9045	3.1e-06	++++?-+++++--+-+++-+-+++++-+	30.1
cg11344744	2	SEMA4C	59.5694	12.7731	34.5342 , 84.6047	3.11e-06	+++++++++++--+++++---+++++-+	0
cg17254383	17	HLF	-80.2125	17.2	-113.9246 , -46.5005	3.11e-06	---------++----?-+-----+----	33.9
cg03989617	16	ADGRG1	-87.9446	18.8614	-124.9129 , -50.9763	3.12e-06	-------+-----+-+----+-+---+-	0
cg09039664	20	SYS1-DBNDD2	-86.5529	18.5622	-122.9348 , -50.171	3.12e-06	-------+------+---+---+-----	26.3
cg00600033	16	CLCN7	57.7295	12.3823	33.4601 , 81.9989	3.13e-06	+++++++++++-++++++++----++-+	31
cg10101634	3	CMTM7	-50.5657	10.846	-71.8238 , -29.3076	3.13e-06	----?+---?----+-----+-+-+---	0
cg06683078	21	TSPEAR	-39.316	8.43463	-55.8479 , -22.7842	3.14e-06	--++-----------------------+	13.4
cg20331155	11	LSP1	35.1836	7.54819	20.3891 , 49.978	3.14e-06	++++++++++++++-+++-+---+++++	31.1
cg22430790	14	FRMD6	-101.752	21.8296	-144.5381 , -58.9663	3.14e-06	---+---+-+--+--+--+---+-----	26
cg06284479	3	LRRFIP2	-79.954	17.1545	-113.5768 , -46.3313	3.15e-06	--+-----------+?--+-+-+-----	32.9
cg13775295	9	COL5A1	49.6248	10.6473	28.7561 , 70.4935	3.15e-06	+++?++++-++++++-++-++-++++-+	0.9
cg11656478	2	CYP1B1	-58.275	12.505	-82.7848 , -33.7652	3.16e-06	-+++--+-+-----+?------+-----	0
cg18191688	1	NBPF20	54.6232	11.7211	31.6498 , 77.5966	3.16e-06	+-+++++--+++++++++++++--+--+	0
cg21393124	17	TOB1-AS1	53.1907	11.4148	30.8178 , 75.5637	3.17e-06	++-+?--+-?+++++-++++-+-+++-+	1.8
cg25813942	18	EMILIN2	-50.8772	10.9215	-72.2835 , -29.471	3.19e-06	--+--+--+-+---+?-++--+------	45.3
cg03097190	22	BPIFC	-42.4841	9.12202	-60.3632 , -24.6049	3.2e-06	-+-+?------------+----++---+	13.7
cg11415156	2	HS1BP3	-51.1391	10.9794	-72.6587 , -29.6195	3.2e-06	---??---+--++-+--+---+------	27.2
cg18767846	2	ITGA4	-48.0283	10.314	-68.2437 , -27.8129	3.21e-06	--+------+-+-+----+-+-----+-	8.3
cg12999267	12	CRADD	-54.6122	11.7297	-77.6025 , -31.6219	3.23e-06	---+---+----+--?-+----------	37.7
cg21524538	20	FKBP1A-SDCBP2	67.3769	14.4726	39.0105 , 95.7432	3.23e-06	++--+-++-+++--+-++-++-++++-+	0
cg10436257	16	FBXL19	44.209	9.49729	25.5943 , 62.8236	3.24e-06	+++-+-+++++-++++++-+++++++++	29
cg26152017	10	UNC5B	66.4104	14.2673	38.4465 , 94.3743	3.24e-06	+++?++-++++-+++-+++++-+-++++	35.8
ch.9.76081330F	9	RORB	-76.6048	16.4566	-108.8597 , -44.3499	3.24e-06	----?---------++----+-+---+?	0
cg27174787	19	TPM4	-84.2207	18.0984	-119.6936 , -48.7479	3.26e-06	----+------+---+-+----------	0
cg14399122	9	COL5A1	-56.7916	12.2065	-80.7163 , -32.867	3.28e-06	---+----+-----------++--+---	0
cg16641055	16	PIEZO1	49.4622	10.6317	28.6239 , 70.3004	3.28e-06	+---+++++++-++-+++-+---+++-+	0
cg18848959	20	TAF4	50.7614	10.9099	29.378 , 72.1447	3.28e-06	+++-+++++++--+++++-+--++++-+	12.6
cg19566658	7	TRIP6	58.0354	12.4747	33.585 , 82.4858	3.28e-06	+++-++++-+++-++-+++++-----++	48.3
cg09195098	6	GCNT2	-25.2401	5.42596	-35.8749 , -14.6052	3.29e-06	----++------+-----+---+-----	0
cg10045354	11	COLCA1	68.379	14.7019	39.5632 , 97.1948	3.3e-06	++++++--+++--+++++++++-+++++	14.3
cg25404375	15	IGF1R	-37.191	7.99634	-52.8638 , -21.5181	3.3e-06	-----+-+-+-++--+----+----+--	0
cg08824847	11	PDHX	-42.2869	9.09317	-60.1096 , -24.4643	3.31e-06	--+---------+--+--+--+----+-	0
cg00275828	17	KRTAP2-4	-46.8066	10.0661	-66.5361 , -27.0771	3.32e-06	------------+----++-+-------	33.5
cg02376282	11	MOB2	68.5951	14.758	39.6694 , 97.5208	3.35e-06	++--++++++++++-+++-+++++++++	15.2
cg11351709	8	ERICH1-AS1	-52.4353	11.2818	-74.5475 , -30.323	3.36e-06	--------+--+--+?------+--+--	27.2
cg04440283	8	TRHR	34.2085	7.36157	19.7798 , 48.6371	3.37e-06	++-+?++++-++-+++++++++++-+++	0
cg08324925	5	CSF2	-57.6651	12.4088	-81.9864 , -33.3438	3.37e-06	---++-+----++-+--+----------	35.7
cg21370143	11	MYBPC3	-79.5888	17.1294	-113.1625 , -46.0151	3.38e-06	-+--++---+-------+--++----++	18
cg04121771	3	TM4SF4	-42.167	9.07604	-59.956 , -24.3779	3.39e-06	-----++----++-++-++---+-----	50.1
cg26207568	5	TRIO	-44.0491	9.48305	-62.6359 , -25.4623	3.4e-06	------+------+++----+------+	16.1
cg15722438	19	HNRNPM	66.6729	14.357	38.5332 , 94.8125	3.42e-06	+-++++++++++-++++-+-++++++++	27.5
cg00502926	14	NDRG2	-35.6742	7.68322	-50.7333 , -20.6151	3.43e-06	-----------++-+-----------?+	20.2
cg14789214	10	KCNIP2	-63.1107	13.5912	-89.7494 , -36.4721	3.43e-06	--+---+----++-------+-+-----	0
cg25799589	4	ZNF827	-60.0384	12.9309	-85.3829 , -34.6938	3.43e-06	---+----+-+---+--+---+-+----	42.9
cg11384744	7	TSPAN13	-42.307	9.11401	-60.1705 , -24.4436	3.45e-06	----?+-----------+----+-----	0
cg26423041	6	CDYL	-57.1422	12.3112	-81.2721 , -33.0123	3.46e-06	---??-------+--+---+---+----	38.3
cg14214856	10	ANKRD30A	-38.3432	8.26184	-54.5364 , -22.15	3.47e-06	--+--------+---?-+---------+	37.4
cg16612806	11	NRGN	-89.963	19.3856	-127.9588 , -51.9672	3.47e-06	--++--------+-----+-----+--+	21.9
cg25557995	12	CACNA1C	34.0408	7.33579	19.6626 , 48.4189	3.48e-06	++++--++-++--+++++--++-+++++	23
cg02107844	15	SLCO3A1	-45.6136	9.83059	-64.8815 , -26.3456	3.49e-06	-----++----++++--+----------	10.1
cg19220719	10	C10orf11	-42.8599	9.23742	-60.9653 , -24.7546	3.49e-06	--------++-++--?------+-+--+	55.4
cg21126707	12	MYF5	-38.2292	8.23954	-54.3787 , -22.0797	3.49e-06	---+------+-+--+--+--+--+---	28.6
cg15991941	12	BCDIN3D-AS1	-77.1547	16.6323	-109.7541 , -44.5554	3.5e-06	-++--+--------+--+---+------	0
cg17740645	17	GRB7	-80.0416	17.2533	-113.8582 , -46.2251	3.5e-06	---++-------++-+----+-+-+-+-	51.7
cg06858555	14	MIR4710	71.2448	15.3586	41.1419 , 101.3477	3.51e-06	+-+++++++-+-++++++-+-+-++-++	27
cg25281677	11	RTN4RL2	-53.652	11.568	-76.3252 , -30.9788	3.52e-06	++-----+------++----+-------	32.1
cg04742397	14	SNHG10	-48.6686	10.4986	-69.2458 , -28.0913	3.56e-06	---?-+-----+---?-+---+-----+	22.2
cg25708790	12	EP400	44.4954	9.60089	25.6776 , 63.3131	3.58e-06	+++?--++++++++++++-+++++++++	5.1
cg13315345	2	IL1RL2	-44.5574	9.61823	-63.4091 , -25.7057	3.61e-06	---?-----+----------+-++----	23.5
cg21929761	1	SPOCD1	60.7794	13.1193	35.0656 , 86.4933	3.61e-06	+-+++++-+-++--++++++-+++++-+	0
cg15889847	14	PLEKHG3	65.95	14.2377	38.0441 , 93.856	3.62e-06	+++++-+++++-++++++++-+++++++	27.7
cg00869582	16	SNX29	-63.3837	13.6854	-90.2071 , -36.5603	3.63e-06	---+?--------++--+-----+----	28.1
cg05697274	1	GALNT2	32.4335	7.00391	18.7058 , 46.1611	3.64e-06	++-+--+++++-++-?++-++-+-+-++	15.2
cg15078958	1	C1orf127	55.2114	11.9219	31.8444 , 78.5784	3.64e-06	+-+++++-+++-++++++++-+-+++-+	12
cg15207091	17	MINK1	-49.6213	10.7162	-70.6251 , -28.6174	3.65e-06	---++-+-----+---------------	21.8
cg26751513	16	TELO2	54.485	11.768	31.4198 , 77.5502	3.66e-06	+++++++++++--++?++-+++++++-+	30.1
cg26694386	1	DESI2	-96.3864	20.8212	-137.1958 , -55.5769	3.67e-06	--++----+--+--+?-+---+---+-+	0
cg13424229	3	CPA3	-53.4563	11.5524	-76.099 , -30.8136	3.71e-06	--------+---+-++-+---+-+----	3.1
cg15521572	18	MBP	-78.4332	16.9528	-111.6608 , -45.2057	3.72e-06	----?+---+-+--+?----++------	24.2
cg06528601	16	COTL1	-63.3992	13.7054	-90.2618 , -36.5365	3.73e-06	--+++--+---+--+---+-+-+-----	23.9
cg05468843	11	IL10RA	38.0376	8.22387	21.9189 , 54.1564	3.74e-06	++--++-+++++-++++++--++-++++	23.4
cg08416522	21	MAP3K7CL	-116.762	25.2538	-166.2592 , -67.2642	3.77e-06	----?--+---+---?--+---+-----	19
cg26740249	17	TNRC6C	-33.3679	7.2169	-47.513 , -19.2228	3.77e-06	--+--+----++-----+-----+----	50.1
cg00517080	11	VPS26B	50.6718	10.9635	29.1834 , 72.1602	3.8e-06	++-+++-+++++--+-++-+++++++-+	0
cg02068015	22	CECR2	-34.5495	7.47514	-49.2008 , -19.8982	3.8e-06	-------+-----+-+-----+----+-	0
cg03294424	8	PCAT1	-36.486	7.89364	-51.9576 , -21.0145	3.8e-06	----++------+--+-+--+-+-----	0
cg19723805	5	LOC340113	-39.399	8.52455	-56.1071 , -22.6908	3.8e-06	--++?-------+--?--+---------	0
cg04704634	5	IL3	-48.784	10.5558	-69.4733 , -28.0947	3.81e-06	--+--------++----+---+------	5.1
cg16903735	11	LSP1	46.0369	9.96198	26.5114 , 65.5624	3.81e-06	-+---+++++++++--++++++-+++++	0
cg18081104	1	THEM5	-64.9203	14.0468	-92.452 , -37.3887	3.81e-06	--++---+--+-+----+----------	16.9
cg18537205	10	VTI1A	-43.258	9.36199	-61.6075 , -24.9085	3.83e-06	-+--+---------++------------	0
cg13424029	10	NKX2-3	37.2476	8.0626	21.4449 , 53.0503	3.84e-06	++++-+-+-++++++?+++++--+++-+	34.2
cg20306265	1	FAM46C	-41.2707	8.93487	-58.783 , -23.7583	3.86e-06	-+-+-+--------+?--------+---	33.9
cg16638092	17	RPTOR	-44.0115	9.53031	-62.6909 , -25.3321	3.87e-06	-----------++-----+--+--+-++	17.6
[truncated: 6,172 more rows]
