# Supplementary material for: Meta-analysis of epigenome-wide association studies in neonates reveals widespread differential DNA methylation associated with birthweight
Source: Nat Commun. 2019 Apr 23;10:1893. doi: 10.1038/s41467-019-09671-3 (PMC6478731; doi:10.1038/s41467-019-09671-3)
Supplement: Supplementary file 6 — Supplementary Data 3 [file 41467_2019_9671_MOESM6_ESM.xlsx]

## Sheet: SData3
Supplementary Data 3. Meta-analysis results from 914 CpGs for the association between methylation levels and continuous birth weight in grams, in three separate ancestry groups. Coefficients (coef), standard errors (SE) and 95% confidence intervals (CI) are presented per 10% increase in methylation level. Chr: chromosome
			European ancestry							Hispanic ancestry							African ancestry
CpG	Chr	Nearest gene	Coef	SE	95% CI	P value	Direction of effect across cohorts	I-squared		Coef	SE	95% CI	P value	Direction of effect across cohorts	I-squared		Coef	SE	95% CI	P value	Direction of effect across cohorts	I-squared
cg00028013	15	LOXL1-AS1	105.527	12.7556	80.5264 , 130.5285	1.306e-16	+++++++++++++-++	21.4		1.8839	3.08696	-4.1665 , 7.9343	0.5417	++-+	0		1.27444	7.72858	-13.8736 , 16.4225	0.869	+-	0
cg00066351	7	LINC00996	-64.3117	10.8627	-85.6026 , -43.0207	3.211e-09	----------------	47.6		-8.99691	3.60049	-16.0539 , -1.94	0.01246	----	62.3		-21.1855	12.291	-45.2758 , 2.9048	0.08477	--	0
cg00075967	15	STRA6	53.1758	10.5645	32.4693 , 73.8822	4.818e-07	++++++-++++++++-	5.1		4.43027	2.90417	-1.2619 , 10.1224	0.1271	++-+	0		-2.3682	10.2517	-22.4615 , 17.7251	0.8173	--	0
cg00091302	1	RGS8	-53.0883	9.94782	-72.586 , -33.5906	9.467e-08	---+--------+---	47.6		-3.00605	3.13642	-9.1534 , 3.1413	0.3378	---+	68.8		1.63715	8.93416	-15.8738 , 19.1481	0.8546	+-	61.5
cg00095326	1	RHOU	76.2452	13.5475	49.692 , 102.7984	1.823e-08	++++++-?++++-+++	42.7		9.33393	3.44682	2.5782 , 16.0897	0.006769	+++-	25.9		5.07871	7.68135	-9.9767 , 20.1342	0.5085	++	0
cg00119811	5	ARHGEF28	-106.463	17.0908	-139.9606 , -72.9645	4.688e-10	--+-------------	38		-11.2583	4.05417	-19.2045 , -3.3122	0.005487	----	75.7		-1.87653	8.26317	-18.0723 , 14.3193	0.8203	+-	0
cg00153395	1	JAK1	77.5722	11.9261	54.197 , 100.9473	7.8e-11	+++++++?++-++-+-	47.5		5.99107	3.54051	-0.9483 , 12.9305	0.09062	++++	65.4		15.8379	9.39893	-2.5839 , 34.2598	0.09197	++	0
cg00162064	1	RNF220	-60.9286	10.065	-80.6559 , -41.2012	1.417e-09	-------?--------	33		-2.74735	2.74769	-8.1328 , 2.6381	0.3174	--+-	30.2		-8.42155	8.80502	-25.6794 , 8.8363	0.3388	--	0
cg00205605	1	FAM213B	96.2853	16.9217	63.1188 , 129.4518	1.27e-08	++++++++++++++--	27.4		4.23163	3.51702	-2.6617 , 11.125	0.2289	++--	0		-24.3028	11.8734	-47.5747 , -1.0308	0.04068	--	30.4
cg00218409	2	SEMA4F	-111.881	19.559	-150.2166 , -73.5453	1.064e-08	-------------+--	0		-16.9439	6.05542	-28.8125 , -5.0753	0.00514	--+-	82.5		-22.4377	8.96207	-40.0033 , -4.872	0.01229	--	0
cg00222472	1	PBX1	32.5065	7.88008	17.0616 , 47.9515	3.705e-05	+++++++++-+++-++	29.8		3.80313	2.01884	-0.1538 , 7.76	0.05959	++++	0		14.2075	5.65485	3.124 , 25.291	0.01199	++	0
cg00227665	16	KLHDC4	43.7849	8.94689	26.249 , 61.3208	9.887e-07	+++++-++++-++++-	37		4.86483	3.02076	-1.0559 , 10.7855	0.1073	++-+	18		9.51833	9.29806	-8.7059 , 27.7425	0.306	+-	56.1
cg00233028	11	CD82	65.3579	11.9283	41.9785 , 88.7374	4.272e-08	++++++++-+++-+++	58.4		5.58057	3.85427	-1.9738 , 13.1349	0.1476	++++	9.1		25.3415	8.99739	7.7066 , 42.9764	0.004854	++	0
cg00253658	16	FTO	-36.17	6.60594	-49.1176 , -23.2223	4.366e-08	-------------++-	0		-4.3002	3.31536	-10.7983 , 2.1979	0.1946	+?--	19.1		-6.38115	8.06929	-22.197 , 9.4346	0.4291	--	34.1
cg00329157	3	C3orf52	-114.005	16.2381	-145.8311 , -82.1779	2.206e-12	------+-----+---	38.3		-4.04355	4.45291	-12.7713 , 4.6842	0.3638	+-+-	0		8.97469	22.3326	-34.7972 , 52.7466	0.6878	++	0
cg00350296	11	CD248	98.9204	17.842	63.9501 , 133.8906	2.952e-08	+-++++-+++++++++	58.9		6.55951	4.67619	-2.6058 , 15.7248	0.1607	-+++	0		-9.79488	12.6944	-34.676 , 15.0862	0.4404	--	0
cg00382138	4	CFI	-56.1483	8.88986	-73.5724 , -38.7242	2.684e-10	--?---+---+--+--	50.1		-4.7599	2.18299	-9.0386 , -0.4812	0.02922	----	0		-10.7761	6.40596	-23.3318 , 1.7796	0.09253	--	0
cg00394823	16	ACSM3	-76.6566	12.4667	-101.0913 , -52.2218	7.802e-10	----------+--+--	0		-10.4825	3.41584	-17.1775 , -3.7874	0.002149	----	45.9		0.972052	4.80788	-8.4514 , 10.3955	0.8398	+-	0
cg00395063	11	ARHGEF12	125.533	16.0604	94.0544 , 157.0112	5.44e-15	+++-++++++++-+++	51.3		13.0218	4.52731	4.1483 , 21.8953	0.004024	+++-	67.2		-0.423973	8.20624	-16.5082 , 15.6603	0.9588	-+	0
cg00410926	9	FAM166B	-61.761	11.8503	-84.9875 , -38.5345	1.87e-07	+-----+-----++--	63.9		1.95615	6.58518	-10.9508 , 14.8631	0.7664	-?+-	43.8		0.125829	12.7225	-24.8104 , 25.062	0.9921	+-	0
cg00431549	12	MGP	-49.1059	10.3461	-69.3842 , -28.8276	2.071e-06	--++--+---------	0		-5.9442	2.35912	-10.5681 , -1.3203	0.01175	----	60.1		5.91412	8.86417	-11.4597 , 23.2879	0.5046	++	0
cg00442282	17	RARA	-164.617	20.9871	-205.7517 , -123.4824	4.373e-15	----------+-----	49.7		-15.811	4.69577	-25.0147 , -6.6073	0.0007597	----	77		-26.6782	14.1974	-54.5052 , 1.1488	0.06023	--	0
cg00448875	3	RAB6B	-48.6606	10.2157	-68.6833 , -28.6379	1.904e-06	-------?-+------	44.6		-4.79925	3.24769	-11.1647 , 1.5662	0.1395	--+-	58.5		-10.8529	14.1275	-38.5427 , 16.837	0.4424	+-	0
cg00496272	16	CENPT	158.343	25.5783	108.2093 , 208.4762	5.997e-10	++++++-+++++-+++	20.9		12.7001	6.73379	-0.4981 , 25.8984	0.05929	++++	0		23.8414	13.4124	-2.4469 , 50.1297	0.07548	++	0
cg00508575	12	ATP2B1	-69.8899	11.6284	-92.6816 , -47.0983	1.852e-09	-------------+--	35.9		-3.46474	3.14814	-9.6351 , 2.7056	0.2711	-+--	40.7		3.62391	9.37127	-14.7438 , 21.9916	0.699	-+	0
cg00533407	7	ASIC3	-64.3196	11.7701	-87.3891 , -41.2501	4.638e-08	-------?--------	25.5		-6.72295	4.42852	-15.4029 , 1.9569	0.129	--+-	0		-49.3905	14.695	-78.1926 , -20.5883	0.0007765	--	0
cg00549798	22	MKL1	42.231	10.1298	22.3767 , 62.0853	3.059e-05	++++++++++--+++-	8.5		6.50352	3.04599	0.5334 , 12.4737	0.03275	++-+	66.9		4.26837	8.21342	-11.8299 , 20.3667	0.6033	+-	0
cg00558749	1	NADK	72.1351	14.3109	44.0858 , 100.1843	4.641e-07	++++++++++++-++-	0		5.3138	3.61049	-1.7628 , 12.3904	0.1411	-+++	12.3		-1.99221	10.3447	-22.2678 , 18.2834	0.8473	+-	53.6
cg00567703	12	HOXC4	-35.7806	7.56379	-50.6056 , -20.9556	2.24e-06	--+-------+--+-+	0		-3.26655	2.11319	-7.4084 , 0.8753	0.1222	-+--	21.1		-5.22967	8.06235	-21.0319 , 10.5725	0.5166	--	0
cg00587472	2	CMPK2	-73.9638	9.42856	-92.4438 , -55.4838	4.342e-15	-------?-+---+--	55		-4.4651	1.93484	-8.2574 , -0.6728	0.02101	----	11		-1.27694	5.63251	-12.3166 , 9.7628	0.8207	+-	0
cg00591515	19	LENG8	82.3818	18.0842	46.9368 , 117.8269	5.227e-06	+++-+++-+++++-++	0		27.203	11.9233	3.8333 , 50.5727	0.02252	+?++	0		-13.9312	12.5128	-38.4563 , 10.5939	0.2656	--	0
cg00602416	10	SKIDA1	62.4015	12.2801	38.3326 , 86.4705	3.744e-07	+++++++?++++++++	0		9.90737	4.89806	0.3072 , 19.5076	0.0431	++++	69.9		50.3943	35.0391	-18.2823 , 119.071	0.1504	++	0
cg00605777	2	SEMA4C	89.4365	16.7372	56.6315 , 122.2415	9.114e-08	+++++++++++++-++	0		5.14538	3.84112	-2.3832 , 12.674	0.1804	+++-	13.7		-0.210461	10.8416	-21.46 , 21.039	0.9845	-+	51.3
cg00637745	2	GLI2	-22.4796	3.60254	-29.5406 , -15.4186	4.378e-10	------------++--	30.5		-0.446453	1.04935	-2.5032 , 1.6103	0.6705	-+-+	48.7		2.53649	2.29617	-1.964 , 7.037	0.2693	-+	0
cg00694258	10	ARHGAP12	-33.1629	7.86281	-48.574 , -17.7518	2.468e-05	---------+--++--	45.9		-6.6691	2.45763	-11.4861 , -1.8521	0.006655	----	74.2		0.271668	5.16293	-9.8477 , 10.391	0.958	+-	0
cg00739778	17	RAP1GAP2	-52.8646	10.3908	-73.2306 , -32.4986	3.626e-07	-------?-+--+---	39.9		-12.0817	3.56035	-19.06 , -5.1034	0.0006903	-?--	0		-7.52916	10.9119	-28.9164 , 13.8581	0.4902	--	0
cg00748072	2	SP3	-77.5136	14.2773	-105.497 , -49.5302	5.662e-08	------+--+------	0		-4.76903	3.52961	-11.6871 , 2.149	0.1766	----	28.2		-12.2357	9.94241	-31.7228 , 7.2514	0.2185	+-	71.5
cg00780426	6	HIST1H3I	-54.9891	11.482	-77.4939 , -32.4843	1.675e-06	---+-+------+--+	6.5		-3.18484	4.47962	-11.9649 , 5.5952	0.4771	-?++	85.5		0.18974	9.6573	-18.7386 , 19.1181	0.9843	-+	0
cg00831931	10	TCF7L2	-79.8801	18.2813	-115.7115 , -44.0487	1.245e-05	-+---++----+----	21.3		-4.52869	6.19446	-16.6698 , 7.6124	0.4647	----	0		14.1565	24.8027	-34.4569 , 62.7699	0.5682	++	0
cg00873678	14	CCDC88C	39.7793	7.7793	24.5319 , 55.0267	3.163e-07	++-+++++++++-+++	57.1		3.914	3.98147	-3.8897 , 11.7177	0.3256	+++-	0		8.01923	12.2253	-15.9423 , 31.9807	0.5119	-+	0
cg00886780	6	SCUBE3	-40.8834	8.84278	-58.2152 , -23.5515	3.776e-06	-------?------+-	0		-5.92804	3.46156	-12.7127 , 0.8566	0.0868	----	54.8		-16.0594	9.97634	-35.613 , 3.4943	0.1075	--	0
cg00921266	7	HOXA3	66.6831	11.5745	43.9971 , 89.3691	8.351e-09	+++-++--++-+++++	0		10.1539	5.22195	-0.0811 , 20.3889	0.05184	++++	0		27.2098	11.8266	4.0296 , 50.39	0.02141	++	0
cg00930606	22	PATZ1	94.0518	16.6048	61.5063 , 126.5973	1.478e-08	++++++-+++++-++-	2.2		2.73976	3.77379	-4.6569 , 10.1364	0.4678	+++-	44.6		-4.45263	11.9275	-27.8304 , 18.9252	0.7089	+-	0
cg00940560	8	MIR548O2	-55.9741	10.8753	-77.2896 , -34.6586	2.648e-07	---------------+	8.7		2.48028	4.65893	-6.6512 , 11.6118	0.5945	-?-+	0		-4.94859	8.86912	-22.3321 , 12.4349	0.5769	+-	0
cg00942920	1	LAX1	-60.4972	9.9366	-79.9729 , -41.0214	1.141e-09	-------------+--	0		-0.870754	2.49902	-5.7688 , 4.0273	0.7275	-+--	87.8		-7.94286	7.62021	-22.8785 , 6.9928	0.2973	--	26.7
cg00971695	14	PLEKHG3	-68.7776	12.869	-94.0008 , -43.5543	9.07e-08	---+---?--------	7.6		-3.96153	3.20979	-10.2527 , 2.3297	0.2171	----	0		-9.58261	7.42977	-24.145 , 4.9797	0.1971	--	0
cg01063280	6	SEC63	-79.2735	12.1193	-103.0273 , -55.5197	6.106e-11	------------+---	46.8		-17.9909	7.59635	-32.8797 , -3.102	0.01787	-?--	0		6.60489	14.3898	-21.5991 , 34.8089	0.6462	++	0
cg01066046	21	SCAF4	104.977	21.8881	62.0768 , 147.8781	1.618e-06	-++-++++++-+++-+	36.6		3.84163	4.73302	-5.4351 , 13.1184	0.417	++--	12.2		-1.79062	13.3359	-27.9289 , 24.3477	0.8932	-+	0
cg01099825	9	NELFB	45.1908	11.1476	23.3415 , 67.0402	5.038e-05	+-+-++-+++++-+++	22.2		1.17904	2.83855	-4.3845 , 6.7426	0.6779	+--+	0		8.12088	7.36402	-6.3126 , 22.5544	0.2701	++	0
cg01110839	11	SLC39A13	53.7412	14.6833	24.9619 , 82.5205	0.0002522	++--+++?+++++-++	0		6.31795	3.05268	0.3347 , 12.3012	0.03849	++-+	76.5		-22.9894	13.9063	-50.2457 , 4.267	0.0983	--	0
cg01115380	6	FOXC1	-49.2172	9.03888	-66.9334 , -31.501	5.179e-08	------+?-------+	17.1		-2.25251	1.57491	-5.3393 , 0.8343	0.1526	----	0		-0.390412	6.38639	-12.9077 , 12.1269	0.9513	+-	0
cg01143068	15	STARD9	-44.7871	12.0817	-68.4671 , -21.107	0.0002097	-----++--++--+--	31.6		-10.8744	3.12684	-17.003 , -4.7458	0.0005056	--+-	61.6		-10.156	4.75295	-19.4717 , -0.8402	0.03262	--	0
cg01264106	22	LGALS1	-71.8878	13.9528	-99.2354 , -44.5403	2.574e-07	----------+-++--	0		-8.21516	3.33036	-14.7427 , -1.6877	0.01363	--+-	78.7		-4.39982	7.62005	-19.3351 , 10.5355	0.5637	+-	15.4
cg01294327	19	SPPL2B	45.2084	11.4835	22.7008 , 67.716	8.257e-05	+++++++?++-++-+-	12.9		5.0389	2.74852	-0.3482 , 10.426	0.06676	++++	0		7.95635	6.70404	-5.1836 , 21.0963	0.2353	++	16.8
cg01303055	11	GALNT18	-93.2164	19.8036	-132.0314 , -54.4015	2.513e-06	-------------+--	0		3.5909	5.98739	-8.1444 , 15.3262	0.5487	-++-	76.9		-6.19606	10.6479	-27.066 , 14.6739	0.5606	--	0
cg01307174	3	ARPP21	-48.0058	10.5177	-68.6206 , -27.3911	5.012e-06	---+------+--+--	18.2		-5.89022	2.71025	-11.2023 , -0.5781	0.02976	--+-	55.4		7.92007	9.65902	-11.0116 , 26.8517	0.4122	++	0
cg01351032	16	CIITA	-65.2049	13.5242	-91.7123 , -38.6975	1.426e-06	------+---+--+--	0		-5.6938	3.81985	-13.1807 , 1.7931	0.1361	-+--	16.1		-4.09267	7.81387	-19.4079 , 11.2225	0.6004	--	0
cg01368219	3	CACNA2D3	54.5541	9.10696	36.7045 , 72.4038	2.093e-09	+++++++-++-+++++	11.7		3.57996	2.14444	-0.6231 , 7.7831	0.09503	++-+	0		-2.09323	6.06322	-13.9771 , 9.7907	0.7299	+-	80.2
cg01400685	11	FADS2	-64.5859	10.9605	-86.0685 , -43.1033	3.802e-09	----------------	44.4		-5.56915	4.05579	-13.5185 , 2.3802	0.1697	--+-	51		-29.1938	11.8062	-52.3339 , -6.0537	0.01341	--	29.2
cg01426808	8	LINC00536	-66.0162	12.3479	-90.218 , -41.8143	8.975e-08	-------+-----+--	33.4		-9.95648	3.58854	-16.99 , -2.9229	0.005528	----	5.5		-4.9345	4.15501	-13.0783 , 3.2093	0.235	--	0
cg01439112	3	CTDSPL	-131.136	27.7142	-185.4557 , -76.8159	2.226e-06	------+--+-----+	0		-10.4066	6.87302	-23.8777 , 3.0646	0.13	-+--	60.9		-34.5182	17.7669	-69.3414 , 0.305	0.05204	--	0
cg01490733	1	SKI	144.085	24.2123	96.6287 , 191.5408	2.667e-09	++++++-+++++--+-	0		0.254763	3.79356	-7.1806 , 7.6901	0.9465	-++-	0		-6.28192	12.2188	-30.2308 , 17.6669	0.6072	-+	0
cg01514538	1	LINC00982	45.9364	9.6077	27.1053 , 64.7675	1.742e-06	++-++-+?+++++-++	3.3		10.4484	4.42151	1.7823 , 19.1146	0.01812	+++-	0		13.2973	17.7228	-21.4394 , 48.034	0.4531	-+	0
cg01515508	1	CASZ1	85.8605	12.0241	62.2932 , 109.4278	9.287e-13	+++++++++++++++-	0		10.1837	4.69288	0.9856 , 19.3817	0.03	++-+	0		4.72081	14.1749	-23.062 , 32.5036	0.7391	+-	0
cg01585860	6	COL12A1	-81.1273	13.5516	-107.6883 , -54.5662	2.143e-09	-------?--------	45.7		-3.0603	2.28834	-7.5454 , 1.4249	0.1811	----	0		-0.133961	9.79138	-19.3251 , 19.0571	0.9891	+-	0
cg01619846	19	UHRF1	88.504	16.3578	56.4427 , 120.5654	6.285e-08	+++++++-++++++++	23.4		4.89605	3.90219	-2.7523 , 12.5443	0.2096	+++-	0		-4.13004	11.9849	-27.6204 , 19.3604	0.7304	+-	0
cg01693350	11	WT1	-36.0622	6.25337	-48.3188 , -23.8056	8.077e-09	---+-----------+	0		-1.20067	2.09368	-5.3043 , 2.9029	0.5663	---+	0		-6.50159	4.93282	-16.1699 , 3.1667	0.1875	--	0
cg01723892	1	MAP10	-53.8737	9.17086	-71.8486 , -35.8988	4.243e-09	-------------+-+	42.9		-4.38382	2.54713	-9.3762 , 0.6086	0.08524	----	0		-14.5761	10.0143	-34.204 , 5.0519	0.1455	--	0
cg01741041	7	ACTB	113.537	19.9035	74.5258 , 152.5476	1.168e-08	-++++-++++++++++	6.2		9.14457	4.45216	0.4183 , 17.8708	0.03998	++-+	0		-2.46105	10.045	-22.1493 , 17.2272	0.8065	+-	86.6
cg01815912	16	NTHL1	91.1515	13.8965	63.9144 , 118.3887	5.406e-11	++++++-++++++++-	54.9		6.22181	3.61026	-0.8543 , 13.2979	0.08482	-+++	0		-0.314449	15.9458	-31.5682 , 30.9393	0.9843	+-	0
cg01820192	21	LINC00319	89.0502	18.0277	53.7158 , 124.3845	7.827e-07	+-++++-+++++-+++	11.5		11.8463	4.14644	3.7193 , 19.9733	0.004277	-+++	0		-0.884079	9.47795	-19.4609 , 17.6927	0.9257	-+	0
cg01832549	1	CAPZB	-47.3371	9.37523	-65.7125 , -28.9616	4.437e-07	---------+---++-	59.2		-4.01154	2.9974	-9.8864 , 1.8634	0.1808	--+-	49.6		-11.7673	8.57951	-28.5832 , 5.0485	0.1702	--	0
cg01858866	1	PABPC4	79.2399	14.7102	50.408 , 108.0718	7.174e-08	+++-+++++++++-+-	17		3.14321	4.17032	-5.0306 , 11.317	0.451	-++-	19		-2.33369	10.2475	-22.4188 , 17.7514	0.8199	--	0
cg01877936	6	ECI2	-53.6277	8.8073	-70.89 , -36.3654	1.136e-09	-------?-+------	0		-5.54431	2.34247	-10.1355 , -0.9531	0.01794	----	23.2		-10.0398	7.6291	-24.9928 , 4.9132	0.1882	+-	54.9
cg01878708	2	MIR5702	-43.9722	7.69307	-59.0506 , -28.8938	1.092e-08	---------++--+--	31.6		-1.33916	2.54013	-6.3178 , 3.6395	0.5981	-++-	4.4		11.3593	6.48597	-1.3532 , 24.0718	0.07988	++	0
cg01894038	11	NDUFC2-KCTD14	-74.9385	14.0311	-102.4394 , -47.4375	9.25e-08	------+?--------	0		-3.0669	3.00505	-8.9568 , 2.823	0.3075	--+-	13.1		-2.39967	14.0215	-29.8818 , 25.0824	0.8641	+-	5.2
cg01899318	16	ZNF19	-56.0416	12.4064	-80.3582 , -31.7251	6.268e-06	+-----------+---	50.1		-9.59281	3.9378	-17.3109 , -1.8747	0.01485	----	59		-11.1295	14.9979	-40.5255 , 18.2665	0.458	--	0
cg01906801	17	MED24	65.4771	12.4245	41.1251 , 89.829	1.364e-07	++++++++++-++-++	0		5.31985	3.53282	-1.6045 , 12.2442	0.1321	++-+	46.6		3.14331	12.0511	-20.4768 , 26.7634	0.7942	+-	10
cg01911077	11	SF1	56.6072	13.7734	29.6114 , 83.6029	3.958e-05	+++++-+-++-+-+++	0		6.5096	2.85598	0.9119 , 12.1073	0.02265	++++	16.1		18.3135	11.5937	-4.4101 , 41.037	0.1142	++	0
cg01919885	4	RGS12	67.6565	11.4578	45.1993 , 90.1137	3.529e-09	+-+-+++++++++++-	18.8		3.4795	2.86026	-2.1266 , 9.0856	0.2238	++--	64.9		14.868	6.3478	2.4263 , 27.3097	0.01917	++	0
cg01966974	1	BATF3	-68.1684	10.5483	-88.8431 , -47.4938	1.03e-10	-------?--+-+---	60.5		-5.79632	2.37629	-10.4539 , -1.1388	0.01472	----	31.8		1.73085	8.04478	-14.0369 , 17.4986	0.8296	++	0
cg01982597	10	ERCC6	-104.656	21.8028	-147.3892 , -61.9221	1.586e-06	------+--+---+--	44.5		-6.15214	6.57135	-19.032 , 6.7277	0.3492	----	3		-36.6809	21.9422	-79.6876 , 6.3258	0.09458	--	64.4
cg01994290	14	PLEKHG3	-72.695	18.8248	-109.5917 , -35.7984	0.0001126	--+--+---+------	5.1		-12.8563	7.27947	-27.1241 , 1.4114	0.07738	+?+-	51.9		-10.9955	15.7743	-41.9132 , 19.9222	0.4858	--	0
cg02068356	1	ROR1	-90.9466	16.5668	-123.4176 , -58.4757	4.026e-08	-------?---+-+--	43		-0.842891	4.34396	-9.357 , 7.6713	0.8461	++-+	73.4		-2.85863	13.8995	-30.1016 , 24.3844	0.8371	-+	0
cg02106534	16	CDIP1	119.556	24.1331	72.2553 , 166.8571	7.269e-07	++++++++++++++-+	35.3		3.28832	5.41335	-7.3219 , 13.8985	0.5436	-+-+	10.7		1.50427	18.716	-35.179 , 38.1876	0.9359	-+	0
cg02149069	12	IFFO1	78.6274	15.6913	47.8724 , 109.3824	5.418e-07	+++++++++++++-+-	0		2.56889	3.61372	-4.514 , 9.6518	0.4772	++-+	0		-2.24663	11.3248	-24.4433 , 19.95	0.8427	+-	0
cg02149899	11	PRKRIR	115.396	13.9406	88.0728 , 142.72	1.256e-16	+++++++-+++++-++	21.3		7.69184	3.18838	1.4426 , 13.9411	0.01585	++-+	0		-4.06756	7.96502	-19.679 , 11.5439	0.6096	-+	0
cg02232751	11	LDHA	90.2532	17.3411	56.2646 , 124.2419	1.944e-07	+++++++-+++++--+	59.3		0.930611	4.60244	-8.0902 , 9.9514	0.8398	++--	0		3.06791	16.3037	-28.8872 , 35.0231	0.8507	+-	0
cg02255004	4	PCAT4	-55.3059	12.9014	-80.5927 , -30.0191	1.813e-05	--+-------+--+--	16.6		-7.20159	3.82222	-14.6931 , 0.29	0.05955	----	50.7		-9.53326	10.5401	-30.1919 , 11.1254	0.3657	+-	0
cg02264407	13	LMO7	61.2475	11.055	39.5797 , 82.9152	3.02e-08	+++++++-+++++-++	46		6.5942	5.53635	-4.257 , 17.4454	0.2336	+?++	0		10.0656	9.98602	-9.507 , 29.6382	0.3135	++	53.2
cg02283735	1	PTPRF	-65.4327	10.2613	-85.5448 , -45.3207	1.81e-10	-------?-----+--	20.7		-3.39589	2.23409	-7.7747 , 0.9829	0.1285	----	45.4		-3.86416	10.4451	-24.3366 , 16.6083	0.7114	--	0
cg02331649	3	TMEM110-MUSTN1	-53.4556	11.0975	-75.2067 , -31.7045	1.458e-06	------++-+---+--	56.7		-5.64855	2.74538	-11.0295 , -0.2676	0.03964	----	12.9		10.4989	11.2002	-11.4535 , 32.4513	0.3486	++	0
cg02332696	10	CASC10	-117.453	22.0994	-160.7682 , -74.1387	1.068e-07	-------?-----+--	0		-7.79519	6.12677	-19.8037 , 4.2133	0.2033	--+-	33.2		-33.4767	16.4228	-65.6654 , -1.288	0.04151	--	23.1
cg02348437	2	MPP4	-61.0176	10.4879	-81.5739 , -40.4612	5.96e-09	-------+-----+--	48.3		-3.77202	4.00082	-11.6136 , 4.0696	0.3458	+---	0		0.0637	11.1185	-21.7285 , 21.8559	0.9954	+-	0
cg02355304	7	FBXL18	63.7524	10.5128	43.1473 , 84.3576	1.326e-09	++++++++++++++++	40		0.756148	3.04859	-5.2191 , 6.7314	0.8041	+++-	0		-22.2593	11.8983	-45.5799 , 1.0614	0.06137	--	0
cg02370100	21	ABCG1	92.7237	20.087	53.3533 , 132.0941	3.91e-06	+++++++?+++++--+	35.8		4.02946	5.35249	-6.4614 , 14.5203	0.4516	-+++	0		3.16362	11.7749	-19.9152 , 26.2424	0.7882	+-	0
cg02397552	13	CLN5	64.4724	10.7614	43.3802 , 85.5647	2.084e-09	+++-++++++++-+++	40.6		8.17573	3.4996	1.3165 , 15.035	0.01948	++-+	29.4		32.4511	9.62786	13.5805 , 51.3217	0.0007502	++	0
cg02402882	5	GPBP1	-78.7736	12.9413	-104.1386 , -53.4086	1.151e-09	----------------	50		-4.59989	3.34533	-11.1567 , 1.957	0.1691	-+--	78		-21.7022	13.5871	-48.3329 , 4.9285	0.1102	--	0
cg02431260	11	ESAM	95.8279	16.6762	63.1427 , 128.5132	9.116e-09	++++++-?++++--+-	33.5		3.84859	3.82952	-3.6573 , 11.3545	0.3149	+++-	54.9		8.23916	8.30574	-8.0401 , 24.5184	0.3212	++	0
cg02449762	10	ASB13	58.6115	9.62977	39.7371 , 77.4858	1.154e-09	++-+++-+++-++---	59.1		6.86172	3.18913	0.611 , 13.1124	0.03143	++-+	0		-5.60486	9.14187	-23.5229 , 12.3132	0.5398	+-	0
cg02461269	6	ARID1B	-88.6616	14.8279	-117.7243 , -59.5988	2.24e-09	----------------	42.6		-5.11488	3.82389	-12.6097 , 2.3799	0.181	----	0		-1.31405	9.72234	-20.3698 , 17.7417	0.8925	--	0
cg02462416	11	H19	47.5756	8.19402	31.5153 , 63.6359	6.393e-09	++++++-?++++-+++	24.8		5.58104	2.63018	0.4259 , 10.7362	0.03384	++++	9.5		1.80861	6.77803	-11.4763 , 15.0935	0.7896	-+	0
cg02473287	2	YWHAQ	-90.9761	16.5613	-123.4362 , -58.5159	3.945e-08	---+--+-----++--	46.4		-10.394	5.01966	-20.2325 , -0.5555	0.03839	-+--	75.4		-18.655	19.9555	-57.7678 , 20.4579	0.3499	-+	47.4
cg02499214	12	RHOF	96.9215	17.633	62.3607 , 131.4822	3.872e-08	+++++++-++++++++	37.8		-5.88738	5.85227	-17.3578 , 5.5831	0.3144	---+	0		10.989	8.62476	-5.9156 , 27.8935	0.2026	++	0
cg02504211	3	XXYLT1	88.0818	17.2631	54.2461 , 121.9174	3.355e-07	+++++++-+++++++-	0		9.46012	3.53448	2.5325 , 16.3877	0.007439	+-++	69.7		7.41531	13.4599	-18.9661 , 33.7967	0.5817	++	0
cg02573176	8	SLC10A5	-54.4146	10.0495	-74.1116 , -34.7177	6.14e-08	---+--+---+-----	53.1		-8.35372	2.38687	-13.032 , -3.6754	0.0004655	----	46.2		-11.5239	8.5206	-28.2242 , 5.1765	0.1762	--	0
cg02577963	19	KDM4B	72.7428	12.1403	48.9478 , 96.5378	2.075e-09	++++++++++-++-++	47.4		0.559824	2.81962	-4.9666 , 6.0863	0.8426	+-+-	57.7		-1.61636	10.1886	-21.586 , 18.3532	0.8739	-+	12.6
cg02583484	12	HNRNPA1	93.2992	14.8921	64.1107 , 122.4876	3.728e-10	++++++++++++----	35.4		0.064471	3.56661	-6.9261 , 7.055	0.9856	+++-	67.4		5.41448	6.70052	-7.7185 , 18.5475	0.4191	++	0
cg02589672	22	TEF	-122.275	26.7303	-174.6661 , -69.8835	4.776e-06	--+----------+--	12.9		-12.8792	7.66221	-27.8972 , 2.1387	0.09279	----	24.6		-9.29811	11.0972	-31.0485 , 12.4523	0.4021	--	0
cg02640173	2	GLI2	-51.8985	8.65974	-68.8716 , -34.9254	2.059e-09	------------+---	0		1.18046	3.4237	-5.53 , 7.8909	0.7303	-+-+	0		9.21507	8.92074	-8.2696 , 26.6997	0.3016	-+	62
cg02704502	11	H19	61.4984	9.84302	42.206 , 80.7907	4.16e-10	++++++--++++++++	0		7.195	3.10347	1.1122 , 13.2778	0.02043	++-+	7.5		3.57497	8.6077	-13.2961 , 20.4461	0.6779	++	0
cg02753354	19	HMHA1	-112.739	15.5956	-143.3067 , -82.1721	4.868e-13	----------------	12.1		-10.1264	4.14879	-18.258 , -1.9947	0.01465	----	0		-5.53499	9.29065	-23.7447 , 12.6747	0.5513	+-	48.2
cg02821342	7	LINC-PINT	-66.8988	14.5623	-95.441 , -38.3566	4.349e-06	--+---+?--+-----	63.8		-4.30153	3.38813	-10.9423 , 2.3392	0.2042	----	2		-17.6153	9.83273	-36.8874 , 1.6569	0.07321	--	0
cg02835421	1	IPO13	-83.4931	19.3701	-121.4586 , -45.5276	1.63e-05	------+--++--+--	14.4		-11.5703	4.90963	-21.1932 , -1.9475	0.01844	--+-	66.7		-24.057	12.7557	-49.0583 , 0.9442	0.0593	--	0
cg02855778	7	PTPRN2	74.8948	13.4431	48.5464 , 101.2433	2.529e-08	+++-++-+++++++++	48.9		9.98552	3.08561	3.9377 , 16.0333	0.001211	++++	0		-3.46872	8.78102	-20.6795 , 13.7421	0.6928	-+	0
cg02892925	8	TOX	-46.8779	7.49559	-61.5692 , -32.1865	3.999e-10	-------+----+---	0		-2.34296	2.55002	-7.341 , 2.6551	0.3582	-+--	10.5		2.7524	6.68886	-10.3578 , 15.8626	0.6807	+-	0
cg02983090	16	IL21R	-68.0951	8.91087	-85.5604 , -50.6298	2.142e-14	------+--+------	48		-6.00985	2.47829	-10.8673 , -1.1524	0.01531	-+--	62		-9.75824	6.98583	-23.4505 , 3.934	0.1625	--	0
cg02988730	1	AMPD2	79.6796	14.2667	51.717 , 107.6423	2.337e-08	+-++++++++-++++-	52.2		2.09513	3.87878	-5.5073 , 9.6975	0.5891	+++-	6.6		-24.1524	15.1936	-53.9318 , 5.627	0.1119	--	0
cg02997316	1	LMNA	-125.241	26.2715	-176.7327 , -73.7486	1.868e-06	------+---+----+	38.7		-17.8324	9.6762	-36.7978 , 1.1329	0.06534	----	18.4		-7.86043	11.4263	-30.256 , 14.5351	0.4915	-+	44
cg03047995	14	FITM1	-52.0813	12.3637	-76.3142 , -27.8483	2.526e-05	------+---+-----	25.9		-8.63875	3.1656	-14.8433 , -2.4342	0.006354	-+--	79.5		-8.02472	7.13658	-22.0124 , 5.963	0.2608	--	0
cg03048432	14	NIN	-46.4907	10.8695	-67.795 , -25.1865	1.893e-05	---++-+---------	7.8		-4.70731	2.12513	-8.8726 , -0.5421	0.02676	----	55.5		2.53791	6.60544	-10.4087 , 15.4846	0.7008	-+	0
cg03059073	7	LINC00996	-51.1204	10.1716	-71.0568 , -31.184	5.014e-07	-------?-----+--	10.7		-3.29059	2.93571	-9.0446 , 2.4634	0.2623	---+	58		5.981	9.57684	-12.7896 , 24.7516	0.5323	++	0
cg03144619	1	GALNT2	29.2587	6.1531	17.1986 , 41.3187	1.983e-06	+++++++?++-+-+-+	57.5		1.66714	1.57904	-1.4278 , 4.7621	0.2911	+++-	0		4.51621	6.73738	-8.6891 , 17.7215	0.5027	-+	49.1
cg03162410	19	TECR	141.028	19.714	102.3882 , 179.6672	8.449e-13	+++++++++++++-++	54.7		28.7379	9.09389	10.9138 , 46.5619	0.001577	+?++	0		-5.30178	12.231	-29.2745 , 18.6709	0.6647	--	0
cg03173827	20	TCEA2	112.599	16.5514	80.1586 , 145.0401	1.025e-11	+++++++++++++++-	0		6.623	5.0106	-3.1978 , 16.4438	0.1862	++-+	26.9		9.6414	6.87388	-3.8314 , 23.1142	0.1607	++	0
cg03180134	4	MAML3	50.2959	11.5279	27.7013 , 72.8906	1.283e-05	+++++++-++++-++-	0		4.21663	3.56308	-2.767 , 11.2003	0.2366	++++	2.9		27.0697	13.9082	-0.1904 , 54.3298	0.05162	++	0
cg03247245	12	GRIP1	-73.7646	16.1915	-105.5 , -42.0292	5.22e-06	----------------	25.9		-5.92026	4.40983	-14.5635 , 2.723	0.1794	----	0		-13.4027	10.248	-33.4888 , 6.6834	0.1909	--	0
cg03254465	1	PRDM16	56.5548	8.9073	39.0965 , 74.0131	2.164e-10	+++++++++++++-+-	52.6		7.34348	3.54099	0.4031 , 14.2838	0.03809	+?++	0		-0.27285	9.3133	-18.5269 , 17.9812	0.9766	-+	0
cg03278811	6	FOXO3	107.656	20.211	68.0425 , 147.2695	1.001e-07	+++++++++++++-+-	18		4.49896	4.10195	-3.5409 , 12.5388	0.2727	+++-	0		-4.87051	13.6101	-31.5464 , 21.8054	0.7204	--	0
cg03327570	2	ZEB2-AS1	-85.9024	17.4649	-120.1336 , -51.6712	8.718e-07	---+--+--+---+--	67.2		-7.68512	5.62956	-18.7191 , 3.3488	0.1722	----	0		-20.9532	21.0835	-62.2769 , 20.3706	0.3203	--	0
cg03335624	5	ENC1	-69.7106	12.3151	-93.8483 , -45.573	1.509e-08	-------?--+-+---	24.4		-4.26701	2.64687	-9.4549 , 0.9209	0.1069	---+	76.4		-16.224	11.9987	-39.7414 , 7.2935	0.1763	+-	0
cg03337886	13	IRS2	58.2198	13.8215	31.1297 , 85.3099	2.528e-05	++++++++++++--+-	48.8		14.6765	5.56454	3.77 , 25.583	0.008352	++++	39.5		10.7194	19.4165	-27.3369 , 48.7758	0.5809	++	0
cg03354508	6	STXBP5	-58.3741	12.4529	-82.7819 , -33.9664	2.765e-06	-------?----+++-	21.2		-7.91257	6.73651	-21.1161 , 5.291	0.2402	-?-+	46.6		-11.3556	11.0506	-33.0148 , 10.3036	0.3041	+-	61.6
cg03390636	15	ARNT2	-50.2562	9.95763	-69.7732 , -30.7393	4.488e-07	------+--++-----	54.2		-5.89502	2.69741	-11.182 , -0.6081	0.02886	----	12.9		-9.7128	6.86009	-23.1586 , 3.733	0.1568	--	0
cg03444940	16	TSC2	50.6811	10.2361	30.6184 , 70.7438	7.375e-07	++++++-+++++--+-	27.7		5.29537	7.25971	-8.9337 , 19.5244	0.4657	+?-+	0		-0.586177	15.1556	-30.2911 , 29.1188	0.9691	+-	0
cg03445287	8	XPO7	-62.4176	15.0254	-91.8674 , -32.9678	3.265e-05	----------+---+-	0		-16.5288	3.43713	-23.2656 , -9.792	1.518e-06	----	69.4		-17.8545	7.90799	-33.3542 , -2.3549	0.02396	--	57.3
cg03467001	1	RGL1	-53.7115	13.3445	-79.8667 , -27.5564	5.697e-05	---------++-----	39.1		-8.96355	3.85585	-16.521 , -1.4061	0.02009	-+--	37.2		4.93624	7.51468	-9.7925 , 19.665	0.5113	++	0
cg03469471	7	NOS3	129.163	20.927	88.1464 , 170.1801	6.739e-10	++++++-+++++-+++	0		7.43973	8.16063	-8.5551 , 23.4346	0.3619	+?-+	0		-10.5132	13.5661	-37.1027 , 16.0763	0.4384	--	0
cg03471593	16	LPCAT2	-42.4438	9.15084	-60.3794 , -24.5081	3.514e-06	----------+---+-	22.4		-10.9932	4.5641	-19.9388 , -2.0475	0.01601	-?+-	0		-30.5942	10.4119	-51.0015 , -10.1869	0.003299	-+	79.9
cg03486991	2	CYP27C1	-66.6544	11.3299	-88.861 , -44.4479	4.027e-09	-----+----+--+--	49		-4.47013	2.86107	-10.0778 , 1.1376	0.1182	-+--	33.5		8.47632	5.69809	-2.6919 , 19.6446	0.1369	+-	74.2
cg03487027	10	ZNF503	46.4052	8.83965	29.0795 , 63.7309	1.524e-07	+++-+++++++++-+-	0		6.1533	3.73223	-1.1619 , 13.4685	0.09921	++-+	32.9		35.2808	13.2552	9.3007 , 61.2609	0.007776	++	0
cg03527802	16	BOLA2	90.4691	14.2168	62.6042 , 118.334	1.972e-10	-++++++-++++--+-	57.7		2.12329	4.89369	-7.4684 , 11.7149	0.6644	+-++	0		-4.66044	9.68549	-23.644 , 14.3231	0.6304	+-	20.8
cg03538922	16	KLHDC4	45.0457	8.46911	28.4462 , 61.6451	1.044e-07	+++++-+-++-+-++-	24.9		4.80716	2.5545	-0.1997 , 9.814	0.05986	++++	14.7		11.5609	5.61013	0.565 , 22.5568	0.03933	+-	80
cg03543319	2	PROKR1	-76.8927	13.7356	-103.8145 , -49.9708	2.168e-08	-----+-------+-+	0		-2.37589	3.73375	-9.694 , 4.9423	0.5246	--+-	23.3		-17.4105	11.7211	-40.3839 , 5.5629	0.1374	+-	76.9
cg03565674	11	MOB2	96.5106	16.869	63.4474 , 129.5738	1.058e-08	+++++--+++++--+-	26.7		6.28835	4.30749	-2.1543 , 14.731	0.1443	+++-	0		27.4219	14.547	-1.0902 , 55.934	0.05942	+-	71.3
cg03573390	16	PLLP	44.5592	9.06494	26.7919 , 62.3265	8.853e-07	+--++++?++++++--	0		4.49643	1.98771	0.6005 , 8.3923	0.02369	++++	0		7.57285	6.79163	-5.7387 , 20.8844	0.2648	++	0
cg03636488	12	EP400	45.97	9.77923	26.8027 , 65.1373	2.592e-06	++++++--++++-+++	6.7		1.56618	2.91606	-4.1493 , 7.2816	0.5912	++-+	0		21.6024	6.8998	8.0788 , 35.126	0.001743	++	0
cg03661409	2	GLS	-95.6575	18.2756	-131.4778 , -59.8373	1.657e-07	------+?-++--+--	32.7		-4.07889	3.87889	-11.6815 , 3.5237	0.293	--+-	0		7.09547	16.3004	-24.8534 , 39.0443	0.6633	++	0
cg03677056	17	SLFN12L	-52.4891	12.9724	-77.915 , -27.0633	5.205e-05	--+--+-+--------	0		-7.72518	3.28373	-14.1613 , -1.2891	0.01864	--+-	62.8		-23.3064	14.4338	-51.5967 , 4.9839	0.1064	--	0
cg03679544	6	TIAM2	50.0047	10.5332	29.3596 , 70.6498	2.061e-06	+++++++-++-+-+-+	39.7		5.95226	2.90259	0.2632 , 11.6413	0.0403	++++	0		4.80069	13.1308	-20.9358 , 30.5371	0.7147	-+	0
cg03687532	16	FTO	-59.019	9.86574	-78.3559 , -39.6822	2.201e-09	------------++--	16.2		-3.17331	3.45655	-9.9482 , 3.6015	0.3586	+--+	3		9.5311	14.5694	-19.025 , 38.0872	0.513	++	0
cg03717364	2	HAAO	41.4045	8.6316	24.4865 , 58.3224	1.612e-06	++++++++++++++++	0		4.28476	2.47996	-0.576 , 9.1455	0.08403	++++	0		-3.77776	6.25318	-16.034 , 8.4785	0.5458	--	0
cg03726147	1	DMAP1	65.4092	15.1334	35.7478 , 95.0706	1.545e-05	-+-+++++++-++-+-	58.7		14.2449	4.39641	5.6279 , 22.8619	0.001195	++-+	71.8		7.28883	19.5091	-30.9491 , 45.5267	0.7087	++	0
cg03726357	8	DUSP4	-60.8944	12.8684	-86.1164 , -35.6723	2.222e-06	------+------+--	48.8		-8.43779	3.8044	-15.8944 , -0.9812	0.02656	--+-	67.6		4.58308	9.43196	-13.9036 , 23.0697	0.627	+-	81.9
cg03753191	13	EPSTI1	-88.258	15.2508	-118.1495 , -58.3665	7.16e-09	----------+--+--	16.1		-9.56485	4.28336	-17.9602 , -1.1695	0.02555	----	38.8		-10.2275	12.5719	-34.8685 , 14.4135	0.4159	-+	63.6
cg03764274	17	OXLD1	95.1263	18.0657	59.7174 , 130.5351	1.398e-07	++++++++++-++++-	25.1		9.37593	4.19405	1.1556 , 17.5963	0.02538	++-+	59.6		-13.9484	8.98471	-31.5584 , 3.6617	0.1206	--	0
cg03796381	15	C15orf41	-68.1007	10.8959	-89.4567 , -46.7447	4.101e-10	-------?--------	21.1		-2.31261	2.38521	-6.9876 , 2.3624	0.3323	---+	71.5		6.56744	8.35738	-9.813 , 22.9479	0.432	++	0
cg03841312	22	MIRLET7BHG	63.071	12.3007	38.9617 , 87.1803	2.937e-07	++++++++++-++++-	3.5		6.44056	2.81532	0.9225 , 11.9586	0.02216	++-+	80.3		1.98677	9.92739	-17.4709 , 21.4445	0.8414	-+	63.9
cg03850035	2	EPHA4	-51.5032	12.0715	-75.1632 , -27.8431	1.985e-05	------+-------+-	53.4		-5.53905	4.02769	-13.4333 , 2.3552	0.1691	-++-	69		3.9827	16.2956	-27.9567 , 35.9221	0.8069	++	0
cg03875678	14	GZMB	-59.0223	12.3826	-83.2922 , -34.7524	1.874e-06	-------------+--	14.1		-2.05246	3.91397	-9.7238 , 5.6189	0.6	-+++	75.3		-9.67171	10.9911	-31.2143 , 11.8709	0.3789	--	0
cg03930153	3	TBL1XR1	-26.9727	7.58555	-41.8403 , -12.105	0.0003768	----+-+?-++-----	36.9		-4.84413	1.53213	-7.8471 , -1.8412	0.001569	----	81.1		-5.54612	6.15694	-17.6137 , 6.5215	0.3677	--	0
cg03969902	1	LINC00982	35.1352	7.26314	20.8994 , 49.3709	1.315e-06	++-++-+++++++-+-	16.1		5.17931	3.78003	-2.2296 , 12.5882	0.1706	+?--	58.6		11.5664	19.8929	-27.4237 , 50.5566	0.5609	-+	0
cg03996020	7	DNAJB6	51.7151	8.28851	35.4696 , 67.9606	4.393e-10	++++++--++++-+++	37.4		-0.716169	3.70279	-7.9736 , 6.5413	0.8466	+?+-	0		4.66858	5.30552	-5.7302 , 15.0674	0.3789	++	0
cg04004830	2	SDPR	-75.5766	15.8217	-106.587 , -44.5661	1.781e-06	+-++-+----------	32.8		-11.3044	4.01442	-19.1727 , -3.4362	0.004863	----	0		-24.5507	9.23592	-42.6531 , -6.4483	0.007856	--	30.2
cg04011671	2	HAAO	62.8408	11.4185	40.4605 , 85.2211	3.725e-08	+++++++?++++++++	42		8.48941	4.65554	-0.6355 , 17.6143	0.06823	+?++	0		0.606036	5.86072	-10.881 , 12.0931	0.9176	-+	0
cg04031093	1	NTPCR	-48.2791	10.4138	-68.6901 , -27.8681	3.551e-06	-+--+++--------+	29.3		-7.83464	2.39012	-12.5193 , -3.15	0.001046	--+-	0		-0.911477	6.04514	-12.7599 , 10.937	0.8802	+-	0
cg04052013	11	TNNT3	115.604	18.7203	78.9119 , 152.2953	6.603e-10	+++++++++++++++-	0		3.45594	3.87346	-4.136 , 11.0479	0.3723	+++-	10.6		2.92191	10.5094	-17.6765 , 23.5204	0.781	++	0
cg04069539	16	ACSF3	60.1744	10.4715	39.6503 , 80.6986	9.111e-09	++++++-+++++-++-	61.4		0.365899	5.68961	-10.7857 , 11.5175	0.9487	+?-+	0		-5.17577	11.9452	-28.5885 , 18.2369	0.6648	--	0
cg04070976	17	LLGL2	93.3208	13.0369	67.7684 , 118.8732	8.175e-13	++++++-+++++++++	42.1		3.30161	3.60541	-3.765 , 10.3682	0.3598	++-+	71.6		3.92177	7.67962	-11.1303 , 18.9738	0.6096	++	0
cg04189326	14	CDC42BPB	-56.2941	11.9799	-79.7747 , -32.8135	2.614e-06	------+--+--+---	20.1		-5.6252	3.57058	-12.6235 , 1.3731	0.1152	----	16.2		12.8174	10.4715	-7.7068 , 33.3417	0.2209	+-	72.7
cg04206967	8	TRHR	54.4153	10.3042	34.219 , 74.6117	1.286e-07	+++++++++++++-+-	15.6		5.83738	2.88948	0.174 , 11.5008	0.04336	++-+	0		18.9592	6.89998	5.4353 , 32.4832	0.006001	++	0
cg04221117	10	CELF2	106.934	21.0111	65.7527 , 148.1162	3.592e-07	++++-++++-+++-+-	39.1		11.0246	5.03288	1.1602 , 20.8891	0.02849	++++	0		6.16791	9.77895	-12.9988 , 25.3346	0.5282	-+	58.1
cg04221877	1	RUNX3	92.0222	18.7922	55.1894 , 128.855	9.74e-07	++-+++-+++-++++-	51.3		15.3089	7.12007	1.3536 , 29.2643	0.03155	+--+	62.6		75.7875	67.7178	-56.9393 , 208.5143	0.2631	++	0
cg04222728	7	KIAA1549	-117.147	20.7006	-157.72 , -76.5735	1.522e-08	-------?--+-----	50.7		-6.1773	4.2973	-14.6 , 2.2454	0.1506	----	0		-9.92518	16.7906	-42.8347 , 22.9844	0.5544	-+	27
cg04246167	3	C3orf67	-76.0424	11.9878	-99.5384 , -52.5464	2.248e-10	---------+------	57.6		-5.21783	2.73697	-10.5823 , 0.1466	0.0566	----	50.3		-15.1098	8.60826	-31.982 , 1.7624	0.07921	--	9
cg04276057	2	C2orf82	78.3652	17.7875	43.5018 , 113.2286	1.055e-05	++++++-+++-++---	26.6		7.48284	3.84154	-0.0466 , 15.0123	0.05143	++++	0		2.41134	13.3818	-23.8169 , 28.6396	0.857	+-	0
cg04304130	6	SMIM13	63.094	11.3331	40.8811 , 85.3068	2.588e-08	+++++++++++++++-	0		4.51944	3.38823	-2.1215 , 11.1604	0.1822	++-+	0		-18.7811	8.34783	-35.1428 , -2.4193	0.02446	--	51.6
cg04310331	11	MRPL23-AS1	134.143	21.9651	91.091 , 177.1942	1.015e-09	+++++++-++++-++-	0		-0.419437	4.80365	-9.8346 , 8.9957	0.9304	-++-	0		-11.3907	15.388	-41.5511 , 18.7698	0.4592	+-	0
cg04324917	16	KLHDC4	49.9393	11.3176	27.7567 , 72.1219	1.022e-05	+++++-+?++-++++-	21.5		4.19945	3.06201	-1.8021 , 10.201	0.1702	++-+	0		2.01906	7.59173	-12.8607 , 16.8989	0.7903	+-	84.1
cg04337944	22	FBLN1	71.9741	15.3302	41.9269 , 102.0213	2.667e-06	++++++++++++---+	8.5		9.43678	3.58165	2.4167 , 16.4568	0.00842	++++	50.2		-2.01623	13.102	-27.6961 , 23.6637	0.8777	-+	4.9
cg04396112	7	MAD1L1	39.825	7.07241	25.9631 , 53.6869	1.791e-08	+++++-+?++-+++++	0		2.94918	1.57401	-0.1359 , 6.0343	0.06098	+++-	25.6		0.726647	4.97011	-9.0148 , 10.4681	0.8838	-+	0
cg04411893	3	SENP2	-115.941	20.2979	-155.7247 , -76.157	1.117e-08	------+---+--+--	44.7		-8.58462	4.23522	-16.8856 , -0.2836	0.04267	----	62.4		-1.88797	9.42034	-20.3518 , 16.5759	0.8412	+-	47
cg04436755	15	LOXL1-AS1	75.8698	13.7042	49.0095 , 102.73	3.09e-08	++++++++++++-+++	0		4.10306	3.19394	-2.1571 , 10.3632	0.1989	++++	0		7.20527	9.81867	-12.0393 , 26.4499	0.4631	++	0
cg04454050	6	TREML1	-116.209	19.9767	-155.3637 , -77.0552	5.982e-09	-----+-------+-+	0		-7.29863	5.21095	-17.5121 , 2.9148	0.1613	----	0		-13.9554	17.0177	-47.3101 , 19.3992	0.4122	-+	46.7
cg04460609	4	LDB2	-50.187	10.1837	-70.147 , -30.227	8.3e-07	---------+---+-+	0		-3.19788	3.1178	-9.3088 , 2.913	0.305	--+-	37.9		-9.73623	9.49149	-28.3396 , 8.8671	0.305	+-	53.1
cg04479212	3	ITGA9	75.4227	11.3428	53.1907 , 97.6546	2.943e-11	+++++++?++++--+-	36.7		6.99387	4.34421	-1.5208 , 15.5085	0.1074	+?--	72.1		6.65986	8.19385	-9.4001 , 22.7198	0.4163	+-	10.2
cg04497992	16	PRR35	-65.549	15.1197	-95.1836 , -35.9144	1.455e-05	------+--+--+-+-	49.3		-9.12316	4.96459	-18.8538 , 0.6074	0.06611	----	0		-48.0105	16.7012	-80.745 , -15.2761	0.004045	--	0
cg04500896	2	LOXL3	78.0915	12.6798	53.239 , 102.944	7.334e-10	++++++++++++--++	7.8		4.89131	3.33315	-1.6417 , 11.4243	0.1422	++-+	24.8		-4.00263	8.70805	-21.0704 , 13.0652	0.6458	+-	68.4
cg04522498	8	TRAPPC9	59.0628	11.6855	36.1593 , 81.9663	4.318e-07	++++++-+++-++-+-	23.4		6.44932	3.67099	-0.7458 , 13.6445	0.07895	++++	0		-1.26948	12.7352	-26.2304 , 23.6915	0.9206	+-	0
cg04523868	11	MAP4K2	80.4291	18.666	43.8437 , 117.0144	1.641e-05	+++++++?++++++-+	47		3.46799	5.27068	-6.8625 , 13.7985	0.5106	+-++	34.6		10.8633	15.9648	-20.4277 , 42.1542	0.4962	++	0
cg04554131	1	RUNX3	81.8567	15.0458	52.3669 , 111.3464	5.313e-08	-+++++-+++++-+++	0		3.95198	4.44546	-4.7611 , 12.6651	0.374	++-+	0		20.1253	9.26974	1.9566 , 38.294	0.02993	++	0
cg04608933	11	KCNQ1	96.3651	22.9395	51.4037 , 141.3265	2.659e-05	+++++-+-++-+--+-	55.6		5.72902	6.47478	-6.9615 , 18.4196	0.3763	+-+-	38.8		3.46619	16.7673	-29.3978 , 36.3302	0.8362	+-	16.8
cg04682802	20	BTBD3	-34.0207	7.73754	-49.1863 , -18.8551	1.098e-05	--+---+--+---+--	52.7		-3.10507	2.10065	-7.2223 , 1.0122	0.1394	--+-	22.2		0.437134	5.24084	-9.8349 , 10.7092	0.9335	+-	0
cg04821520	11	C11orf74	-43.712	10.1846	-63.6738 , -23.7502	1.771e-05	-+----++--+--+-+	32.7		-2.16642	2.52286	-7.1112 , 2.7784	0.3905	----	0		-2.51083	7.56733	-17.3428 , 12.3211	0.74	--	0
cg04830471	19	CCDC155	-93.927	20.1217	-133.3656 , -54.4885	3.042e-06	------++------+-	22.5		-2.83724	7.01832	-16.5931 , 10.9187	0.686	+-+-	54.3		-1.99094	18.1441	-37.5535 , 33.5716	0.9126	--	0
cg04872675	12	TMEM119	120.542	11.2283	98.535 , 142.5499	6.926e-27	++++++++++-+++++	35.7		7.81394	2.84582	2.2361 , 13.3918	0.006037	++++	0		2.90257	7.84069	-12.4652 , 18.2703	0.7112	-+	0
cg04884025	1	ZFYVE9	-74.9123	14.6238	-103.575 , -46.2495	3.013e-07	------+-----++--	0		-1.29611	4.08851	-9.3096 , 6.7174	0.7512	+-+-	28.4		38.7367	22.4802	-5.3245 , 82.7978	0.08486	++	10.3
cg04904815	6	UNC5CL	-91.5037	18.8175	-128.386 , -54.6213	1.158e-06	------+------+--	0		-20.403	4.63195	-29.4816 , -11.3244	1.059e-05	--+-	78.4		-5.71052	14.426	-33.9855 , 22.5645	0.6922	+-	0
cg04912316	17	UBALD2	89.0531	15.2313	59.1998 , 118.9064	5.013e-09	++++++++++++++++	24.1		4.8004	5.61669	-6.2083 , 15.8091	0.3927	++++	0		-10.7775	18.1852	-46.4205 , 24.8654	0.5534	-+	57.9
cg04933530	14	IRF2BPL	-65.4565	13.4151	-91.7502 , -39.1629	1.065e-06	------+--+--+-+-	57.1		-2.09435	4.36636	-10.6524 , 6.4637	0.6315	-++-	0		-33.6403	13.8709	-60.8274 , -6.4533	0.0153	--	0
cg04945379	16	CIITA	-84.5823	16.4341	-116.7931 , -52.3715	2.65e-07	-------?--------	0		-2.8997	3.76085	-10.271 , 4.4716	0.4407	--+-	0		2.6331	16.4891	-29.6856 , 34.9518	0.8731	+-	35.6
cg04968127	11	MRVI1	95.7545	13.0578	70.1613 , 121.3478	2.248e-13	++++++--++++++++	38		6.08796	4.83426	-3.3872 , 15.5631	0.2079	+--+	0		10.938	10.9508	-10.5256 , 32.4016	0.3179	-+	29
cg04982834	1	EVI5	-46.113	11.5029	-68.6588 , -23.5673	6.102e-05	---+--+---------	0		-8.67197	3.53816	-15.6068 , -1.7372	0.01425	----	0		9.03391	8.1332	-6.9072 , 24.975	0.2667	++	0
cg04983687	16	ZFPM1	-39.6318	9.67347	-58.5918 , -20.6718	4.186e-05	------+--+--+-+-	8.2		-4.73504	2.61639	-9.8632 , 0.3931	0.07033	-++-	69.5		-18.5636	9.644	-37.4658 , 0.3386	0.05424	--	0
cg05012661	4	KIAA0232	-34.9048	7.7603	-50.115 , -19.6946	6.864e-06	--+----+----+---	52.4		-3.46561	2.27375	-7.9222 , 0.9909	0.1275	----	0		-23.1072	6.65842	-36.1577 , -10.0567	0.0005197	--	0
cg05056497	21	RCAN1	-55.2983	7.61835	-70.2303 , -40.3663	3.912e-13	-------------+--	0		-1.91438	2.38606	-6.5911 , 2.7623	0.4224	-++-	49.7		0.700875	6.28702	-11.6217 , 13.0234	0.9112	+-	0
cg05057834	3	ITGA9	127.774	19.1684	90.2037 , 165.3437	2.631e-11	+++++++-++++--+-	30.9		3.87804	4.84502	-5.6182 , 13.3743	0.4235	++--	49.1		-8.6511	13.1489	-34.4229 , 17.1207	0.5106	+-	60.9
cg05061471	11	CALCA	53.9327	15.4587	23.6337 , 84.2318	0.0004851	+++++++-+++++--+	17.9		9.60826	3.65849	2.4376 , 16.7789	0.008632	++-+	51		0.145666	10.873	-21.1655 , 21.4568	0.9893	-+	73.9
cg05099464	11	ARHGEF12	-39.1773	11.8524	-62.4079 , -15.9466	0.0009483	----+-+---?-+?--	0		-4.41111	2.5813	-9.4705 , 0.6482	0.08747	--+-	46.6		-6.90057	7.49703	-21.5948 , 7.7936	0.3573	--	0
cg05119988	4	MSMO1	-53.6464	8.6058	-70.5137 , -36.779	4.554e-10	------+---+-----	57.1		-4.75822	2.82524	-10.2957 , 0.7792	0.09215	--+-	32.1		-10.7159	7.24589	-24.9179 , 3.486	0.1392	--	0
cg05135499	10	SKIDA1	41.3367	6.9691	27.6773 , 54.9962	3.003e-09	++++++--++++++++	16.1		8.40338	3.11813	2.2919 , 14.5149	0.007039	++++	64.7		17.7708	12.4353	-6.6023 , 42.1439	0.153	++	0
cg05141333	8	PLEC	101.333	20.0204	62.0931 , 140.573	4.16e-07	+++++++?+++++-+-	29.9		0.53109	7.87271	-14.8994 , 15.9616	0.9462	+++-	0		-58.5493	53.6725	-163.7474 , 46.6488	0.2753	--	27.3
cg05155595	2	ANXA4	-63.3003	13.1181	-89.0119 , -37.5887	1.397e-06	-------?--+--++-	31.4		-4.77567	3.43544	-11.5091 , 1.9578	0.1645	----	0		-17.9815	15.1244	-47.6252 , 11.6623	0.2345	--	0
cg05191655	4	TBC1D1	-84.1724	14.3529	-112.3041 , -56.0407	4.505e-09	------+?-----+--	54.8		-4.56539	3.93727	-12.2824 , 3.1517	0.2462	----	0		-0.027543	10.4896	-20.5872 , 20.5321	0.9979	+-	0
cg05208050	2	MOGS	-98.36	20.6693	-138.8718 , -57.8482	1.948e-06	------++----+---	24.8		-2.00745	5.52954	-12.8454 , 8.8305	0.7166	-++-	12.7		-25.0997	14.1101	-52.7555 , 2.5561	0.07526	+-	0
cg05208178	2	INPP5D	104.663	20.1257	65.2169 , 144.1095	1.988e-07	-++-++++++++-+++	21.5		4.27981	4.54803	-4.6343 , 13.1939	0.3467	-++-	0		0.159953	12.1525	-23.659 , 23.9789	0.9895	+-	66.5
cg05294455	17	MYL4	68.3184	12.8855	43.0629 , 93.5739	1.146e-07	++++++-?++++++++	18.8		3.29561	2.86252	-2.3149 , 8.9061	0.2496	+++-	30.8		-1.44423	9.05339	-19.1889 , 16.3004	0.8733	-+	0
cg05343289	1	SELP	-69.4274	14.6902	-98.2202 , -40.6346	2.289e-06	-----++-----+-+-	46.8		-6.20353	4.01497	-14.0729 , 1.6658	0.1223	--+-	37.1		-9.73803	17.4041	-43.85 , 24.3739	0.5758	--	0
cg05349624	21	COL18A1	47.1576	9.20583	29.1142 , 65.201	3.014e-07	+++-++--++-+--++	18.1		8.76543	2.86912	3.1419 , 14.3889	0.00225	++++	39.9		-6.87619	6.34412	-19.3107 , 5.5583	0.2784	--	0
cg05433805	3	LRRFIP2	-54.9993	8.82064	-72.2877 , -37.7108	4.509e-10	------+?--+--+--	49.1		0.32418	2.18049	-3.9496 , 4.5979	0.8818	++-+	0		-14.3026	9.40006	-32.7268 , 4.1215	0.1281	--	18
cg05460571	8	MFHAS1	62.3988	13.1233	36.6772 , 88.1204	1.986e-06	++++++-++++++-++	5.6		3.10653	4.05357	-4.8385 , 11.0515	0.4435	+++-	0		8.47636	12.4302	-15.8869 , 32.8396	0.4953	+-	54.9
cg05478824	17	ASPSCR1	128.587	20.9723	87.481 , 169.6924	8.718e-10	+++++++?++++++++	21.1		3.31422	3.57363	-3.6901 , 10.3185	0.3537	-+++	0		-4.6037	8.47542	-21.2155 , 12.0081	0.587	--	0
cg05503887	11	EHF	-72.2183	14.7593	-101.1465 , -43.2901	9.927e-07	------++--------	0		-2.9515	4.18698	-11.158 , 5.255	0.4809	--++	60.3		-16.0374	13.8767	-43.2357 , 11.1609	0.2478	+-	0
cg05504759	3	DUSP7	84.3511	17.8441	49.3767 , 119.3255	2.277e-06	++++++++++-+++++	0		7.01346	4.00384	-0.8341 , 14.861	0.07983	++-+	24		3.41448	13.3479	-22.7474 , 29.5763	0.7981	+-	27.5
cg05512157	12	DIP2B	67.1973	12.0016	43.6741 , 90.7204	2.156e-08	?+-++++++++++?-?	11.8		-0.994365	2.82481	-6.531 , 4.5423	0.7248	-+--	0		8.3218	7.20307	-5.7962 , 22.4398	0.248	+-	77.2
cg05573767	6	RPS6KA2	36.2679	6.40482	23.7145 , 48.8213	1.491e-08	++++++--+++++++-	0		1.53099	1.99845	-2.386 , 5.448	0.4436	--++	0		1.12508	7.6098	-13.7901 , 16.0403	0.8825	-+	0
cg05575921	5	AHRR	79.5949	13.3794	53.3712 , 105.8185	2.697e-09	+++++++?+++++++-	4.8		-1.5467	4.00489	-9.3963 , 6.3029	0.6993	+-+-	65.3		23.2332	15.4361	-7.0215 , 53.4879	0.1323	+-	68.6
cg05593411	5	PDE4D	82.9932	15.4788	52.6547 , 113.3317	8.243e-08	++++++-+++++-+-+	58.3		5.28872	4.79948	-4.1183 , 14.6957	0.2705	+++-	0		11.9905	8.70667	-5.0746 , 29.0555	0.1685	++	0
cg05648303	4	SCOC	-38.569	7.73008	-53.72 , -23.418	6.055e-07	-------?-++-----	59.5		-2.56794	2.03928	-6.5649 , 1.429	0.2079	---+	50.6		2.77294	7.88624	-12.6841 , 18.23	0.7251	++	0
cg05779272	9	B4GALT1	162.628	21.8519	119.7981 , 205.4576	9.897e-14	+++++++++++++++-	37		5.04228	5.62146	-5.9758 , 16.0603	0.3697	++-+	0		-22.8872	14.0457	-50.4169 , 4.6424	0.1032	-+	70.1
cg05799596	13	RASA3	63.0624	13.5525	36.4994 , 89.6254	3.269e-06	+++++++-++-++-+-	44		6.73886	3.37625	0.1214 , 13.3563	0.04594	++-+	0		6.0531	14.1136	-21.6095 , 33.7157	0.668	-+	0
cg05814312	10	PTCHD3P1	-45.0025	9.52865	-63.6786 , -26.3263	2.326e-06	-----++---+-----	14.5		-3.0765	2.45532	-7.8889 , 1.7359	0.2102	----	0		-5.70969	8.80538	-22.9682 , 11.5488	0.5167	--	0
cg05851442	7	HOXA3	52.9203	9.04401	35.1941 , 70.6466	4.874e-09	++++++++++-++-++	0		5.41032	4.47387	-3.3585 , 14.1791	0.2265	+?-+	0		8.53989	9.0756	-9.2483 , 26.3281	0.3467	-+	83.9
cg05894462	7	PTPRN2	59.0613	10.9953	37.5105 , 80.612	7.808e-08	++++++-++++++-++	45.4		3.81409	3.08185	-2.2263 , 9.8545	0.2159	++-+	0		-23.1733	10.463	-43.6808 , -2.6657	0.02678	--	35.1
cg05901196	10	CCDC6	72.9261	12.1453	49.1214 , 96.7307	1.919e-09	+++-++++++++-?+?	25.3		4.74038	4.88098	-4.8263 , 14.3071	0.3315	+?++	0		19.3115	9.4245	0.8394 , 37.7835	0.04046	++	0
cg05910124	8	TRAPPC9	61.243	12.1791	37.3719 , 85.1142	4.943e-07	++++++--++++++++	0		3.66262	3.28184	-2.7698 , 10.095	0.2644	++-+	0		9.67086	6.91387	-3.8803 , 23.2221	0.1619	-+	16.9
cg05922714	16	N4BP1	-43.7099	9.78194	-62.8825 , -24.5373	7.88e-06	--+---??-+----?-	49.1		-21.896	5.65746	-32.9846 , -10.8073	0.0001087	-?--	0		-25.8259	12.249	-49.834 , -1.8178	0.035	--	0
cg05925497	11	ARHGAP42	-50.1445	9.69008	-69.137 , -31.1519	2.281e-07	-------?-----+--	17.2		-2.21938	2.28278	-6.6936 , 2.2549	0.3309	-++-	85.7		-8.94164	4.66753	-18.09 , 0.2067	0.0554	--	0
cg05935520	5	CDH18	-51.2781	12.8468	-76.4578 , -26.0984	6.565e-05	-+----+--++--+--	10		-9.15776	3.57183	-16.1585 , -2.157	0.01035	----	66.4		0.050963	5.29233	-10.322 , 10.4239	0.9923	-+	0
cg05942111	12	RASSF3	-71.0544	14.5669	-99.6055 , -42.5033	1.073e-06	------+-----+---	39.1		-3.97469	4.40364	-12.6058 , 4.6564	0.3667	--+-	43.6		-8.78935	15.8837	-39.9214 , 22.3427	0.58	-+	0
cg05950943	16	NTN3	-124.682	21.6265	-167.0701 , -82.2942	8.154e-09	-------+-----+--	30.8		-4.52609	5.11511	-14.5517 , 5.4995	0.3762	-+--	43.2		-13.623	11.1388	-35.455 , 8.209	0.2213	--	0
cg06001419	7	FOXK1	-55.3657	11.5093	-77.9239 , -32.8076	1.505e-06	------+-----+---	23.1		-4.01288	3.35285	-10.5845 , 2.5587	0.2314	----	14.7		-26.154	11.4689	-48.6332 , -3.6749	0.02258	--	0
cg06072822	13	MCF2L	99.7203	19.2619	61.967 , 137.4736	2.254e-07	++-++++-++++--+-	49.2		2.19258	9.13015	-15.7025 , 20.0877	0.8102	+?++	0		4.87745	11.4878	-17.6387 , 27.3936	0.6711	++	0
cg06079495	10	RAB11FIP2	-46.1948	13.9917	-73.6186 , -18.7711	0.0009614	---------+-+--+-	52.4		-12.6737	6.52285	-25.4584 , 0.1111	0.05202	----	0		-26.9198	16.3886	-59.0415 , 5.202	0.1005	--	50
cg06178669	11	HRASLS2	-38.9516	9.00521	-56.6018 , -21.3014	1.522e-05	---+--+------+-?	0		-2.00018	2.53938	-6.9774 , 2.977	0.4309	+-+-	49.1		-6.25842	5.54466	-17.126 , 4.6091	0.259	--	0
cg06231285	7	LRCH4	51.3021	10.5375	30.6486 , 71.9556	1.124e-06	++++++-+++-++++-	46.4		13.2821	6.04945	1.4252 , 25.139	0.02812	+?++	0		-4.80557	9.50948	-23.4442 , 13.833	0.6133	--	0
cg06336535	19	FCHO1	72.9666	14.7594	44.0382 , 101.895	7.664e-07	+++-+++?++++-+++	0		2.22663	3.48819	-4.6102 , 9.0635	0.5233	++++	0		-7.16216	9.01872	-24.8389 , 10.5145	0.4271	-+	0
cg06378491	11	MAP4K2	206.106	24.6455	157.8009 , 254.4113	6.124e-17	++++++++++-+++++	51		9.98877	5.43931	-0.6723 , 20.6498	0.0663	-+-+	0		-35.2327	19.7526	-73.9477 , 3.4823	0.07447	--	0
cg06388350	4	PDLIM5	-65.2325	10.633	-86.0732 , -44.3918	8.521e-10	------+?-+------	62.4		-2.02242	1.73483	-5.4227 , 1.3778	0.2437	--+-	35.2		6.57175	9.5767	-12.1986 , 25.3421	0.4926	++	0
cg06405563	17	MYO15B	56.8701	10.3295	36.6242 , 77.1159	3.679e-08	++++++-+++-++-++	18.8		3.05337	2.85253	-2.5376 , 8.6443	0.2844	++-+	50.8		11.1014	7.39679	-3.3963 , 25.5991	0.1334	++	0
cg06452184	4	ADGRL3	51.9845	10.4654	31.4723 , 72.4967	6.79e-07	++?+++-?++++++-+	38.9		4.37766	5.94167	-7.268 , 16.0233	0.4613	+?+-	0		8.13823	7.89853	-7.3429 , 23.6193	0.3028	+-	93.2
cg06462065	19	TMEM190	86.2706	16.1043	54.7062 , 117.835	8.462e-08	+-++++++++++-+++	35.1		5.24009	3.99631	-2.5927 , 13.0729	0.1898	++--	0		1.32217	11.2025	-20.6348 , 23.2792	0.906	++	0
cg06478823	16	ACSM3	-55.3564	8.0044	-71.045 , -39.6678	4.654e-12	---+---?--------	0		-3.20726	1.79937	-6.734 , 0.3195	0.07468	----	16.2		8.07682	7.41209	-6.4509 , 22.6045	0.2759	++	0
cg06500792	2	LOC400958	-70.4005	12.74	-95.3709 , -45.4302	3.277e-08	------+?--------	42.7		-5.40402	2.87742	-11.0438 , 0.2357	0.06037	----	53.6		-19.1655	16.5181	-51.5409 , 13.21	0.2459	--	0
cg06535156	6	TIAM2	67.5671	18.7389	30.8388 , 104.2954	0.0003113	+++++++-++-+-+-+	43.9		8.83862	4.23743	0.5333 , 17.144	0.03699	++-+	0		16.9945	11.7515	-6.0385 , 40.0275	0.1481	++	0
cg06560379	6	NFKBIE	126.433	22.6144	82.1083 , 170.7569	2.26e-08	++++++++++++++-+	41.9		1.635	7.6403	-13.34 , 16.61	0.8305	+--+	53.4		20.6331	11.4097	-1.7299 , 42.9962	0.07055	++	0
cg06612130	4	LOC728175	-81.1309	12.1896	-105.0225 , -57.2393	2.819e-11	------+-----++--	20.6		0.441676	3.44779	-6.316 , 7.1993	0.8981	-+-+	21.4		-10.6557	15.3595	-40.7603 , 19.4489	0.4878	--	0
cg06634552	6	RNF182	-93.304	16.9845	-126.5936 , -60.0143	3.941e-08	-------+----+--+	25		-6.43631	3.69966	-13.6876 , 0.815	0.08191	----	0		2.86635	5.8627	-8.6245 , 14.3572	0.6249	++	0
cg06673684	13	MCF2L	65.4787	8.52802	48.7638 , 82.1936	1.615e-14	+++++++++++++-+-	8.8		7.64764	3.04853	1.6725 , 13.6228	0.01212	+?++	12.9		19.8866	7.6547	4.8834 , 34.8898	0.009378	++	0
cg06685437	17	RAI1	68.74	12.7232	43.8025 , 93.6775	6.564e-08	++++++--++-++-++	39.5		-0.219605	3.33209	-6.7505 , 6.3113	0.9475	-+--	30.2		16.3814	14.1638	-11.3797 , 44.1424	0.2474	++	0
cg06775523	1	MEGF6	40.445	9.0835	22.6413 , 58.2487	8.485e-06	+++++-++++++++++	0		4.68669	2.41431	-0.0454 , 9.4187	0.05223	++-+	0		1.94611	4.59373	-7.0576 , 10.9498	0.6718	+-	0
cg06850687	12	SMARCC2	-73.971	13.2565	-99.9537 , -47.9883	2.405e-08	------++--+-++--	52.6		-6.41041	3.18597	-12.6549 , -0.1659	0.04421	----	28.9		-25.4419	15.053	-54.9459 , 4.062	0.091	--	0
cg06870470	19	DOCK6	-61.4894	11.0723	-83.1911 , -39.7877	2.801e-08	--+--+----+-----	0		-2.53473	2.34753	-7.1359 , 2.0664	0.2803	--+-	54.5		-7.31256	7.99625	-22.9852 , 8.3601	0.3605	--	0
cg06872313	12	ATF7IP	-62.3479	11.9751	-85.819 , -38.8768	1.925e-07	--+-------------	0		-5.09762	5.94527	-16.7504 , 6.5551	0.3912	-?--	0		-6.14654	12.5713	-30.7862 , 18.4931	0.6249	+-	30.2
cg06874403	10	SKIDA1	56.7727	13.073	31.1495 , 82.3959	1.407e-05	++++++-+++++-+-+	7.8		11.844	3.37497	5.229 , 18.4589	0.0004492	++++	36.9		3.71492	8.37969	-12.7093 , 20.1391	0.6575	-+	0
cg06890610	16	SNX29	50.8855	11.987	27.3911 , 74.38	2.185e-05	+++++++++++++-+-	39.7		8.23722	5.06228	-1.6848 , 18.1593	0.1037	+++-	0		12.7293	9.19915	-5.3011 , 30.7596	0.1664	++	55.8
cg06898463	10	PBLD	-46.6786	11.2752	-68.778 , -24.5793	3.474e-05	------+-----+---	58.4		-11.1203	4.20699	-19.366 , -2.8746	0.00821	----	0		-10.9684	13.8012	-38.0189 , 16.082	0.4268	--	0
cg06937357	14	PACS2	153.432	25.0615	104.3113 , 202.5522	9.228e-10	+++-++++++++-++-	54.3		15.8021	7.92378	0.2714 , 31.3327	0.04612	-+++	0		19.5006	12.0941	-4.2039 , 43.205	0.1069	++	43.5
cg06967124	5	FLT4	57.3954	10.686	36.4508 , 78.34	7.827e-08	+++-++++++++-+++	28.2		2.19967	2.79637	-3.2812 , 7.6805	0.4315	-+-+	0		-2.48701	8.08048	-18.3248 , 13.3507	0.7583	--	0
cg06996175	19	GNG7	67.5935	13.5524	41.0307 , 94.1562	6.115e-07	+-++++++++++++++	0		5.4631	2.85291	-0.1286 , 11.0548	0.0555	++++	0		11.0742	8.41379	-5.4168 , 27.5652	0.1881	++	12
cg07042014	14	LTB4R	-82.1131	16.7565	-114.9558 , -49.2704	9.565e-07	----------+--+--	41.6		-9.37649	3.34491	-15.9325 , -2.8205	0.00506	--+-	53.3		-24.4903	14.6931	-53.2888 , 4.3081	0.09556	+-	41.9
cg07102001	16	KLHDC4	50.387	12.6141	25.6633 , 75.1107	6.483e-05	-++++--++++++++-	0		4.02659	2.89411	-1.6459 , 9.6991	0.1641	++-+	0		-0.474401	11.0614	-22.1547 , 21.2059	0.9658	+-	0
cg07105221	7	RADIL	49.2638	8.1668	33.2569 , 65.2707	1.617e-09	++++++--++-+--+-	36.4		7.63514	2.85887	2.0318 , 13.2385	0.00757	++-+	0		2.77377	6.58995	-10.1425 , 15.6901	0.6738	++	0
cg07116631	16	TIGD7	-55.6599	12.2836	-79.7358 , -31.584	5.864e-06	-----+-------+--	55.9		-9.20585	3.75206	-16.5599 , -1.8518	0.01415	----	15.3		-4.34665	10.4359	-24.8009 , 16.1076	0.677	+-	0
cg07133097	2	GLI2	-30.7219	4.81793	-40.1651 , -21.2788	1.811e-10	-------+----++--	18		0.253116	1.77071	-3.2175 , 3.7237	0.8863	-+-+	11.9		2.80178	4.52198	-6.0613 , 11.6649	0.5355	-+	20.5
cg07137429	10	PYROXD2	-83.7267	15.4262	-113.9621 , -53.4913	5.713e-08	-------------+--	0		-9.8177	4.87685	-19.3763 , -0.2591	0.0441	----	51.2		-25.357	15.7344	-56.1964 , 5.4824	0.1071	--	0
cg07144560	5	CSNK1A1	-119.121	13.633	-145.8413 , -92.4	2.379e-18	------+------+--	54.2		-4.88309	3.85034	-12.4298 , 2.6636	0.2047	-++-	55.5		-19.7632	13.1143	-45.4673 , 5.9409	0.1318	--	0
cg07157107	8	CHRNA6	-65.4229	12.4025	-89.7319 , -41.114	1.328e-07	---------+---+--	59.1		-3.8214	3.01389	-9.7286 , 2.0858	0.2048	--+-	59.4		-1.01744	5.81032	-12.4057 , 10.3708	0.861	--	0
cg07168232	1	LAMB3	-75.0918	11.4696	-97.5723 , -52.6113	5.87e-11	----------------	0		-2.94687	3.09849	-9.0199 , 3.1262	0.3416	--+-	43.4		4.46745	12.6621	-20.3502 , 29.2851	0.7242	+-	0
cg07177115	2	IL36A	-94.1203	17.8511	-129.1085 , -59.1322	1.346e-07	------++--+-+---	33.8		-2.76354	5.29681	-13.1453 , 7.6182	0.6019	---+	0		-0.723439	22.0466	-43.9348 , 42.4879	0.9738	+-	0
cg07211044	8	TOX	-40.7996	7.63807	-55.7702 , -25.829	9.212e-08	-------+-----+--	0		-5.62315	2.52554	-10.5732 , -0.6731	0.02598	--+-	0		-5.16398	9.42442	-23.6358 , 13.3079	0.5837	--	0
cg07243202	8	NDRG1	-58.1111	11.8763	-81.3886 , -34.8337	9.928e-07	----------------	42.6		-7.16374	3.28357	-13.5995 , -0.7279	0.02913	--+-	80.6		-5.96509	15.3128	-35.9782 , 24.048	0.6969	--	0
cg07248377	16	MGRN1	64.5554	12.9038	39.264 , 89.8467	5.649e-07	++++++--+++++++-	0		1.94479	3.25371	-4.4325 , 8.3221	0.55	++-+	9.9		-1.8357	10.138	-21.7061 , 18.0347	0.8563	+-	75
cg07285708	3	TATDN2	149.775	23.688	103.3463 , 196.2033	2.568e-10	++++++++++++++-+	52.5		-1.8288	7.49924	-16.5273 , 12.8697	0.8073	+-+-	0		-6.74425	11.4294	-29.1459 , 15.6574	0.5551	--	0
cg07313835	1	POU2F1	-80.9582	18.3821	-116.9871 , -44.9293	1.062e-05	----+-+?-+----+-	51		-1.12261	5.25304	-11.4186 , 9.1734	0.8308	--++	0		-9.48253	14.7543	-38.401 , 19.436	0.5204	--	0
cg07313882	17	TMC6	134.195	18.9565	97.0402 , 171.3496	1.451e-12	++++++++++++--++	5.8		4.2972	4.35059	-4.23 , 12.8244	0.3233	+++-	0		-13.5635	7.56893	-28.3986 , 1.2716	0.07313	--	0
cg07317017	15	LOXL1-AS1	110.642	15.5103	80.2423 , 141.0426	9.786e-13	+++++++-++++++++	0		3.5846	3.39276	-3.0652 , 10.2344	0.2907	++++	0		-3.27441	8.64073	-20.2102 , 13.6614	0.7047	+-	17.7
cg07340025	5	ANKH	-52.7432	8.8515	-70.0921 , -35.3943	2.543e-09	----------+-+---	0		-5.87282	3.14856	-12.044 , 0.2984	0.06215	++--	76.5		-14.4726	10.9281	-35.8917 , 6.9465	0.1854	--	0
cg07397493	11	MRPL23-AS1	104.287	14.0458	76.7576 , 131.8171	1.129e-13	++++++++++++++++	0		5.44608	3.34476	-1.1097 , 12.0018	0.1035	++-+	61.5		28.938	12.946	3.5639 , 54.3121	0.0254	++	0
cg07443710	10	TSPAN15	-64.7208	11.918	-88.0801 , -41.3616	5.619e-08	------+--+------	44.9		-9.10287	3.27728	-15.5263 , -2.6794	0.005477	--+-	78.1		-5.20878	13.2031	-31.0869 , 20.6694	0.6932	--	0
cg07452706	14	NUDT14	121.266	18.838	84.3433 , 158.1882	1.216e-10	-+++++-+++-+++++	48.4		3.84581	3.75765	-3.5192 , 11.2108	0.3061	+++-	50.7		19.5916	9.71556	0.5491 , 38.6341	0.04375	++	0
cg07488576	2	SDPR	-108.259	23.2035	-153.7379 , -62.7801	3.077e-06	--++---?-+-----+	0		-16.6955	6.11913	-28.689 , -4.702	0.006364	----	0		-18.3257	9.8492	-37.6302 , 0.9787	0.0628	--	16.8
cg07552087	16	MLST8	-56.6251	12.517	-81.1584 , -32.0919	6.072e-06	-------?----+---	50.7		-7.70185	3.96926	-15.4816 , 0.0779	0.05233	--+-	0		-12.9226	16.353	-44.9746 , 19.1293	0.4294	+-	0
cg07565042	11	RNF141	-55.349	12.983	-80.7956 , -29.9024	2.015e-05	------+--+----+-	47.9		-2.91104	3.61595	-9.9983 , 4.1762	0.4208	+-+-	0		-6.77256	12.4145	-31.105 , 17.5599	0.5854	-+	80.6
cg07565551	2	OSBPL6	-62.2744	14.2889	-90.2806 , -34.2682	1.311e-05	---------+----+-	41.6		-4.75005	3.66286	-11.9293 , 2.4292	0.1947	--+-	0		-16.3743	10.9251	-37.7875 , 5.0388	0.1339	--	82.4
cg07565956	17	ZBTB4	89.9426	17.397	55.8446 , 124.0407	2.341e-07	+++++++?++++++-+	44.6		6.31165	4.02456	-1.5765 , 14.1998	0.1168	++-+	0		7.53681	12.447	-16.8593 , 31.933	0.5448	+-	36.1
cg07579839	4	MFSD10	155.593	30.5132	95.7873 , 215.3989	3.411e-07	+++++++?++++++++	49.2		13.0232	10.336	-7.2355 , 33.2818	0.2077	++++	0		-17.0682	20.915	-58.0616 , 23.9252	0.4145	--	0
cg07589393	7	SKAP2	-67.189	13.7848	-94.2071 , -40.1708	1.093e-06	-------?-++-----	29.9		-3.44215	3.25609	-9.8241 , 2.9398	0.2904	---+	0		-22.5417	18.6395	-59.0753 , 13.9918	0.2265	--	7.6
cg07624815	3	FGD5	165.09	28.4241	109.3788 , 220.8013	6.319e-09	+-+++++-++++-++-	26.7		-0.494625	5.52103	-11.3158 , 10.3266	0.9286	-+--	0		-1.03127	14.1618	-28.7884 , 26.7259	0.9419	+-	0
cg07626482	19	SLC1A5	108.554	21.4661	66.4802 , 150.6273	4.259e-07	-++-+++++++++--+	31.1		8.55197	5.47504	-2.1791 , 19.2831	0.1183	+++-	18.5		13.1561	11.1989	-8.7938 , 35.1059	0.2401	++	15.7
cg07638500	3	MYLK	80.9339	13.8401	53.8073 , 108.0605	4.982e-09	+++++++++++++-++	0		10.9257	3.9119	3.2584 , 18.5931	0.005223	++++	40.5		11.9964	10.1882	-7.9726 , 31.9653	0.239	++	0
cg07677157	12	RPSAP52	-51.0591	7.77131	-66.2909 , -35.8274	5.025e-11	--?----?--------	0		-4.902	1.54569	-7.9316 , -1.8724	0.001517	--+-	50.3		-6.58009	5.57293	-17.503 , 4.3429	0.2377	--	0
cg07696514	8	IKBKB	65.4372	15.0561	35.9273 , 94.9471	1.385e-05	++-++++-++++++++	0		3.81341	4.50965	-5.0255 , 12.6523	0.3978	++-+	0		17.198	16.4396	-15.0237 , 49.4197	0.2955	-+	0
cg07699546	1	NAV1	-53.4259	12.4293	-77.7873 , -29.0645	1.72e-05	-----+++-----+--	0		-13.2859	5.87503	-24.801 , -1.7708	0.02373	-?--	0		-0.126783	9.12233	-18.0065 , 17.753	0.9889	-+	79.4
cg07702888	1	RHBG	-82.2125	16.5649	-114.6797 , -49.7452	6.939e-07	----+-+?----+---	46.1		-9.8059	4.12225	-17.8855 , -1.7263	0.01737	--+-	71.9		2.20605	9.35877	-16.1371 , 20.5492	0.8137	+-	0
cg07714085	2	PRKCE	-74.85	16.1321	-106.469 , -43.231	3.487e-06	---------++-----	47.8		-2.32519	4.24375	-10.6429 , 5.9926	0.5838	--+-	0		-34.3193	16.2222	-66.1147 , -2.5238	0.03438	--	0
cg07732037	12	MPHOSPH9	54.6399	8.52683	37.9273 , 71.3525	1.474e-10	-+++++-+++++-++?	55.5		3.22077	2.3464	-1.3782 , 7.8197	0.1699	++-+	58.8		6.4697	10.0817	-13.2905 , 26.2299	0.5211	++	0
cg07795325	4	CAMK2D	-65.5423	12.1767	-89.4086 , -41.676	7.342e-08	-------?------+-	55.5		-4.6918	2.73576	-10.0539 , 0.6703	0.08635	--+-	73.3		-8.00138	12.0058	-31.5327 , 15.5299	0.5051	--	0
cg07807757	7	GRB10	-96.1967	13.8646	-123.3714 , -69.022	3.969e-12	------+---+-+---	40.7		-6.07913	2.91593	-11.7944 , -0.3639	0.03709	----	67.6		16.638	9.74108	-2.4545 , 35.7305	0.08763	++	0
cg07814318	15	KLF13	55.6936	11.289	33.5671 , 77.8201	8.08e-07	+-+++++++++++++-	8.1		0.606449	3.32487	-5.9103 , 7.1232	0.8553	++--	62.7		8.27177	10.7302	-12.7593 , 29.3029	0.4408	-+	24.2
cg07815836	19	ZNF274	-64.5818	13.3094	-90.6682 , -38.4954	1.22e-06	+----+-?----++--	19.2		-1.25512	3.03912	-7.2118 , 4.7016	0.6796	-+-+	0		-23.2124	9.79068	-42.4021 , -4.0227	0.01775	--	0
cg07824636	1	DUSP10	-60.7489	11.2087	-82.718 , -38.7799	5.967e-08	---+------+-----	52.2		-4.6944	3.5866	-11.7241 , 2.3353	0.1906	-+--	29.8		-5.00935	9.08428	-22.8145 , 12.7958	0.5813	--	0
cg07830855	6	DST	-67.4167	14.9452	-96.7092 , -38.1241	6.454e-06	------+--+--+---	0		-5.4182	3.38203	-12.047 , 1.2106	0.1091	----	56.2		26.9205	15.9116	-4.2663 , 58.1073	0.09067	++	0
cg07850246	11	C11orf40	-43.2564	10.3374	-63.5178 , -22.9951	2.859e-05	------+---+-----	10.6		-5.87418	2.8214	-11.4041 , -0.3442	0.03734	----	0		6.11362	8.35739	-10.2669 , 22.4941	0.4645	++	0
cg07858848	2	HAAO	-29.0962	10.489	-49.6546 , -8.5379	0.005537	--+-+-++-+---++-	15.6		-6.5022	2.49569	-11.3937 , -1.6107	0.009177	--+-	51.4		-10.9854	6.35478	-23.4407 , 1.47	0.08387	--	0
cg07951201	13	METTL21C	-39.4475	9.01165	-57.1103 , -21.7846	1.201e-05	------+?--------	50		-5.4286	2.07383	-9.4933 , -1.3639	0.008853	----	0		-9.37054	7.44619	-23.9651 , 5.224	0.2082	--	0
cg07970325	6	PRDM1	-62.3211	12.6121	-87.0408 , -37.6013	7.758e-07	-------------+--	39.2		-29.231	7.61355	-44.1536 , -14.3085	0.0001234	-?--	31.2		-15.2583	14.7016	-44.0735 , 13.5568	0.2993	--	0
cg07996594	1	RUNX3	69.0726	12.68	44.2198 , 93.9255	5.113e-08	+++++++++++++-+-	15.8		14.621	5.70779	3.4337 , 25.8082	0.01042	++++	0		57.5293	46.2717	-33.1632 , 148.2218	0.2138	++	0
cg08026735	2	VWA3B	-73.5387	14.0028	-100.9843 , -46.0932	1.507e-07	-------+--+-----	15.4		-2.45458	3.50596	-9.3263 , 4.4171	0.4839	-+-+	65.4		13.3706	9.02448	-4.3174 , 31.0585	0.1385	++	0
cg08032483	16	CLCN7	42.212	9.65288	23.2923 , 61.1316	1.226e-05	++++++--+++++-+-	0		7.89867	4.03462	-0.0092 , 15.8065	0.05026	++++	11.1		6.08119	8.96515	-11.4905 , 23.6529	0.4976	+-	56.7
cg08101036	7	HOXA3	50.3713	10.7084	29.3828 , 71.3598	2.552e-06	+++-++-+++-+++++	5.9		9.28127	4.8405	-0.2061 , 18.7687	0.05518	++++	0		15.6981	13.0412	-9.8626 , 41.2588	0.2287	++	0
cg08108224	6	PRIM2	-79.6155	12.9971	-105.0898 , -54.1411	9.033e-10	------+---?--+--	30.4		-22.381	5.14676	-32.4687 , -12.2934	1.37e-05	-?--	0		-0.051767	5.03329	-9.917 , 9.8135	0.9918	+-	0
cg08217545	19	NFIC	-46.981	10.1766	-66.9271 , -27.0348	3.901e-06	----+-+?--------	50.4		-4.74188	2.08781	-8.834 , -0.6498	0.02313	--+-	0		-20.2069	17.902	-55.2948 , 14.881	0.259	+-	83.4
cg08250921	16	BANP	44.3618	9.44148	25.8565 , 62.8671	2.619e-06	++++++--++++++++	56.8		2.77576	2.95786	-3.0216 , 8.5732	0.348	-+-+	36.8		-1.68151	9.74437	-20.7805 , 17.4175	0.863	-+	0
cg08264519	14	BRF1	81.1285	17.5541	46.7226 , 115.5345	3.807e-06	+++-++-?++++++++	12.4		8.34842	4.69243	-0.8488 , 17.5456	0.07522	++++	0		-7.07893	9.97176	-26.6236 , 12.4657	0.4778	-+	34.3
cg08274637	13	DLEU7-AS1	49.4467	9.79876	30.2412 , 68.6523	4.506e-07	++++++++++-++-++	21.8		4.53785	2.35092	-0.07 , 9.1457	0.05358	++-+	0		16.9027	8.68751	-0.1248 , 33.9302	0.0517	++	0
cg08282819	16	IL21R	-68.0599	9.52689	-86.7326 , -49.3872	9.067e-13	------+--+------	53.8		-6.6317	2.70361	-11.9308 , -1.3326	0.01417	-+--	74		-13.06	7.22455	-27.2201 , 1.1001	0.07065	--	0
cg08305942	16	MAF	-58.8351	11.4099	-81.1985 , -36.4716	2.516e-07	---------+--+---	40.3		-6.1126	3.49552	-12.9638 , 0.7386	0.08034	--+-	0		-8.25919	9.78029	-27.4286 , 10.9102	0.3984	--	0
cg08351131	17	HEXIM2	-53.185	12.8056	-78.284 , -28.0861	3.278e-05	----++----------	0		-7.73311	3.27677	-14.1556 , -1.3106	0.01828	+-+-	71.2		-16.094	11.9422	-39.5007 , 7.3126	0.1778	--	0
cg08362785	22	MKL1	74.2886	16.1932	42.5499 , 106.0272	4.483e-06	+++++++?++---++-	0		11.9052	5.03944	2.0279 , 21.7825	0.01816	++-+	52.2		12.1345	12.503	-12.3713 , 36.6403	0.3318	+-	5.7
cg08380440	11	MIR4686	45.4428	10.2384	25.3755 , 65.5101	9.06e-06	++-++++?++-++?+?	0		3.07288	2.1392	-1.1199 , 7.2657	0.1509	++-+	0		8.65125	6.70179	-4.4843 , 21.7867	0.1967	++	19.7
cg08381620	13	LINC00327	-26.4063	5.00687	-36.2197 , -16.5928	1.335e-07	------++-----+--	0		-4.33049	1.83753	-7.9321 , -0.7289	0.01844	----	56		-6.71566	4.7236	-15.9739 , 2.5426	0.1551	--	0
cg08400424	5	ARHGAP26	-69.3519	13.0987	-95.0254 , -43.6784	1.193e-07	-+----+------+--	26.5		-4.99947	3.16176	-11.1965 , 1.1976	0.1138	+---	19.7		-6.00887	12.6434	-30.7899 , 18.7722	0.6346	--	0
cg08404702	16	TSC2	94.2818	9.22564	76.1995 , 112.364	1.621e-24	+++++++?++++++++	34.4		1.79539	3.09511	-4.271 , 7.8618	0.5619	+--+	0		-7.02817	6.96455	-20.6787 , 6.6223	0.3129	--	0
cg08420923	16	ANKRD11	63.2257	10.7796	42.0978 , 84.3537	4.482e-09	++++++-?++++++++	63.5		5.16298	2.90542	-0.5316 , 10.8576	0.07557	++++	0		0.756846	11.8216	-22.4135 , 23.9272	0.949	-+	68.6
cg08422803	21	ITGB2	54.8026	12.7472	29.8182 , 79.7871	1.714e-05	++++-+--++-+++++	56.8		6.10794	3.66779	-1.0809 , 13.2968	0.09585	++-+	0		0.609295	7.76514	-14.6104 , 15.829	0.9375	-+	0
cg08441314	11	SORL1	-69.2992	13.793	-96.3334 , -42.265	5.054e-07	-------------+--	37.1		-12.5353	4.51638	-21.3874 , -3.6833	0.005511	----	0		-20.9915	19.0007	-58.2329 , 16.2498	0.2693	--	0
cg08447200	22	PANX2	53.8703	8.83759	36.5486 , 71.192	1.09e-09	++++++-?+++++++-	20.1		5.28291	2.4298	0.5205 , 10.0453	0.02969	++++	0		4.47384	6.94231	-9.1331 , 18.0808	0.5193	-+	54.9
cg08471846	19	PTBP1	73.745	15.0776	44.1929 , 103.2971	1.003e-06	+++-++++++-++--+	46.3		5.21119	3.85184	-2.3384 , 12.7608	0.1761	+++-	30		8.08719	13.3525	-18.0836 , 34.258	0.5447	++	0
cg08474929	11	UPK2	138.162	24.4811	90.179 , 186.1447	1.665e-08	++++++-+++++++++	6.3		4.41996	5.29392	-5.9561 , 14.7961	0.4038	++-+	0		3.50337	12.2859	-20.5769 , 27.5837	0.7755	+-	20
cg08530838	5	TRIM36	91.2612	16.8047	58.3239 , 124.1985	5.614e-08	++++++--++++++++	54		2.31554	4.43833	-6.3836 , 11.0147	0.6019	+-+-	63.5		14.4658	7.64221	-0.513 , 29.4445	0.05837	++	62.1
cg08549335	7	ZNRF2	-47.0771	9.21312	-65.1349 , -29.0194	3.225e-07	-------------?+?	26.5		-3.82598	2.24952	-8.235 , 0.5831	0.08898	--+-	0		0.085467	5.29143	-10.2857 , 10.4567	0.9871	-+	0
cg08571918	2	LINC01114	37.3372	10.2661	17.2157 , 57.4588	0.0002759	+++++++?++-+--+-	17		6.22668	2.2091	1.8969 , 10.5565	0.004823	+++-	53.8		6.10868	4.59546	-2.8984 , 15.1158	0.1838	++	0
cg08627825	22	LINC00229	78.4534	16.0431	47.0089 , 109.8979	1.008e-06	+++++-+-+-++++++	0		4.50937	2.8838	-1.1429 , 10.1616	0.1179	++++	0		12.2539	6.14298	0.2136 , 24.2941	0.04607	++	0
cg08643339	4	GALNTL6	-66.5361	10.8091	-87.7218 , -45.3503	7.48e-10	+-----+------+--	63.4		-0.258826	3.47407	-7.068 , 6.5504	0.9406	-++-	0		-2.45325	5.68518	-13.5962 , 8.6897	0.6661	--	0
cg08706907	11	ATG13	106.678	20.0635	67.3538 , 146.0029	1.055e-07	++++++++++++-+++	6.6		3.09598	5.01402	-6.7315 , 12.9235	0.5369	-+++	0		3.52953	5.78706	-7.8131 , 14.8722	0.5419	+-	65.3
cg08755703	16	IRX3	-55.2255	9.28228	-73.4188 , -37.0322	2.689e-09	-------+--------	26.4		-3.20398	2.59315	-8.2866 , 1.8786	0.2166	----	2.7		5.55389	5.74627	-5.7088 , 16.8166	0.3338	++	0
cg08756594	11	LSP1	80.063	18.8096	43.1962 , 116.9297	2.076e-05	+++-+++++++-+++-	1.1		7.82551	3.3347	1.2895 , 14.3615	0.01894	++++	0		5.21999	13.5377	-21.3138 , 31.7538	0.6998	-+	0
cg08787968	11	WT1	-39.8396	7.06399	-53.685 , -25.9942	1.702e-08	---+--+---------	0		1.19959	2.53573	-3.7704 , 6.1696	0.6362	+-++	0		-9.59487	6.86177	-23.0439 , 3.8542	0.162	--	0
cg08817867	17	ALDH3A1	-63.8732	11.9719	-87.3382 , -40.4082	9.542e-08	--+--++---+-----	0		-6.59813	2.90193	-12.2859 , -0.9103	0.02298	----	61.3		-24.2255	9.0586	-41.9803 , -6.4706	0.007488	--	42.7
cg08818716	7	RADIL	92.729	18.6046	56.264 , 129.194	6.222e-07	-++-+++?+++-+-++	55.9		10.5964	7.02486	-3.1723 , 24.3652	0.1314	++++	0		10.5881	15.615	-20.0172 , 41.1934	0.4977	++	0
cg08832695	17	HOXB-AS3	71.3858	14.8014	42.375 , 100.3966	1.415e-06	+++++++++++++-+-	22.8		8.83176	3.78059	1.4218 , 16.2417	0.01949	++-+	53.1		8.38859	13.1826	-17.4494 , 34.2265	0.5246	+-	59.2
cg08854834	21	MAP3K7CL	-97.3624	16.9194	-130.5244 , -64.2005	8.69e-09	---+------+--+--	0		-6.85153	3.24436	-13.2105 , -0.4926	0.0347	----	44.5		-10.1535	12.5854	-34.8208 , 14.5138	0.4198	--	0
cg08857310	17	LOC100507351	-135.407	28.9828	-192.2135 , -78.6009	2.983e-06	---+---------+--	10.9		-23.4897	9.09521	-41.3163 , -5.6631	0.009805	----	70.2		-6.73066	14.9154	-35.9649 , 22.5036	0.6518	--	0
cg08947774	4	PALLD	-53.5195	10.8097	-74.7065 , -32.3325	7.381e-07	-----+-?-++-----	25.7		-5.49201	2.37834	-10.1536 , -0.8305	0.02093	----	8.8		-11.3504	9.72239	-30.4063 , 7.7055	0.243	+-	70.6
cg08958168	16	SLC12A4	89.7184	16.3531	57.6664 , 121.7704	4.104e-08	+++++++++++++++-	24.3		5.51967	3.12538	-0.6061 , 11.6454	0.07738	++++	0		-9.72979	14.8247	-38.7862 , 19.3266	0.5116	--	0
cg09026568	22	TRABD	67.1375	11.557	44.4857 , 89.7892	6.276e-09	+++-+++++++++++-	0		-0.319917	2.99972	-6.1994 , 5.5595	0.9151	+---	0		-9.17663	9.79858	-28.3819 , 10.0286	0.349	+-	0
cg09076584	17	SPAG5-AS1	67.5105	14.3099	39.463 , 95.5579	2.385e-06	+++++++++++++++-	33.8		5.89817	4.8006	-3.511 , 15.3073	0.2192	-+++	0		19.0133	12.3256	-5.1449 , 43.1715	0.1229	++	0
cg09098522	10	ZNF438	58.5191	13.0364	32.9678 , 84.0705	7.159e-06	-+++++++++++++-+	58.1		5.51654	3.86946	-2.0676 , 13.1007	0.154	++++	0		15.5904	4.37915	7.0072 , 24.1735	0.0003707	++	0
cg09109520	16	ADGRG1	81.7462	15.4259	51.5114 , 111.981	1.163e-07	++++++-+++++-+++	24.1		3.50051	4.1087	-4.5525 , 11.5536	0.3942	++-+	0		5.48914	10.5654	-15.219 , 26.1973	0.6034	-+	21.9
cg09113483	1	NFIA	25.8249	6.20103	13.6709 , 37.9789	3.119e-05	+++++++++++-+---	29.9		4.95558	1.43005	2.1527 , 7.7585	0.0005296	+++-	77.2		11.6464	3.8604	4.08 , 19.2127	0.002554	++	0
cg09119776	10	SUFU	60.9471	10.876	39.63 , 82.2641	2.097e-08	++++++++++-+++++	0		4.28887	2.80041	-1.1999 , 9.7777	0.1256	++-+	47.6		10.1157	8.86767	-7.2649 , 27.4963	0.254	++	14.4
cg09121543	17	LIMD2	65.7994	12.8274	40.6578 , 90.9411	2.903e-07	+++++-+++++++-+-	33		2.40189	2.67281	-2.8368 , 7.6406	0.3688	+--+	64.8		8.74082	11.7317	-14.2532 , 31.7349	0.4562	++	0
cg09174162	7	MAD1L1	33.9162	7.59696	19.0262 , 48.8062	8.028e-06	+++++-+?++-+++++	15.6		3.73108	1.6707	0.4565 , 7.0057	0.02553	++++	41.1		2.66003	5.38567	-7.8959 , 13.2159	0.6214	++	0
cg09187007	1	MEGF6	52.6947	9.45061	34.1716 , 71.2179	2.464e-08	+++++-++++++++++	0		4.06254	3.83784	-3.4596 , 11.5847	0.2898	+-++	0		0.294222	6.78391	-13.0022 , 13.5907	0.9654	+-	0
cg09220326	3	CDCP1	-53.8198	11.2396	-75.8495 , -31.7902	1.681e-06	------+---+-+--+	0		-3.39325	2.78758	-8.8569 , 2.0704	0.2235	----	0		-0.425077	11.4061	-22.7811 , 21.9309	0.9703	+-	50.8
cg09255514	16	ABCC1	-50.7045	9.40832	-69.1448 , -32.2642	7.072e-08	------++-----+--	35.8		0.392025	1.99967	-3.5273 , 4.3114	0.8446	-++-	0		1.06712	7.51026	-13.653 , 15.7872	0.887	+-	0
cg09273716	20	SOGA1	-55.4165	11.4789	-77.9152 , -32.9178	1.381e-06	------+-----++--	14.8		-4.40853	3.32029	-10.9163 , 2.0992	0.1843	----	0		-14.587	7.19684	-28.6928 , -0.4812	0.04268	+-	83.6
cg09294084	13	MCF2L	69.7283	9.23553	51.6267 , 87.8299	4.352e-14	++++++++++-++-++	0.9		2.12938	2.43872	-2.6505 , 6.9093	0.3826	+-++	71.7		10.9348	7.53925	-3.8421 , 25.7117	0.147	++	0
cg09321238	1	PRDM16	139.428	20.2521	99.7336 , 179.1217	5.794e-12	+++-+++++++++--+	54.3		6.17003	5.15571	-3.9352 , 16.2752	0.2314	+++-	0		6.40381	9.51353	-12.2427 , 25.0503	0.5009	-+	87.1
cg09340403	6	TNFAIP3	-41.256	8.86599	-58.6333 , -23.8787	3.267e-06	------+-----++--	22.2		-5.26003	3.27409	-11.6772 , 1.1572	0.1082	----	17.4		-5.27545	9.40894	-23.717 , 13.1661	0.575	-+	47.9
cg09364590	6	TIAM2	66.8107	15.4756	36.4786 , 97.1427	1.58e-05	++++++++++++-+-+	51.7		8.01934	3.78045	0.6097 , 15.429	0.0339	++-+	31.6		10.5689	12.0104	-12.9715 , 34.1092	0.3789	++	0
cg09379146	3	TIPARP	-52.3105	9.9486	-71.8098 , -32.8113	1.456e-07	------+--+------	46.8		-2.35265	2.59232	-7.4336 , 2.7283	0.3641	-+--	0		-12.5057	7.75829	-27.7119 , 2.7006	0.107	-+	72.3
cg09427944	16	ZNF688	133.753	25.8971	82.9946 , 184.511	2.407e-07	+++++++-++++++++	44.7		4.26218	9.74232	-14.8328 , 23.3571	0.6618	+-++	0		29.7466	17.184	-3.934 , 63.4272	0.08344	++	0
cg09476997	16	SLC9A3R2	53.3241	7.73456	38.1643 , 68.4838	5.415e-12	++++++-+++-+++++	25.8		3.72003	1.96157	-0.1246 , 7.5647	0.0579	++-+	40.8		1.28981	5.27756	-9.0542 , 11.6338	0.8069	+-	0
cg09546258	11	GAL	-121.813	19.5263	-160.0845 , -83.5414	4.421e-10	----------------	36.1		-6.00685	5.03096	-15.8675 , 3.8538	0.2325	-+--	40.7		-2.36495	11.1357	-24.1909 , 19.461	0.8318	-+	0
cg09695430	11	WT1	-89.9972	11.217	-111.9825 , -68.0118	1.03e-15	----------------	0		-1.11014	3.06526	-7.118 , 4.8978	0.7172	-+--	0		-20.8074	9.85572	-40.1246 , -1.4901	0.03476	--	29.8
cg09704401	2	SERTAD2	-46.8058	10.3157	-67.0245 , -26.5871	5.697e-06	------+--+----+-	49.8		-5.83326	3.41957	-12.5356 , 0.8691	0.08804	----	41		-35.9251	13.6329	-62.6455 , -9.2047	0.008409	--	74.4
cg09726279	17	MYBBP1A	132.812	21.0014	91.6493 , 173.9749	2.55e-10	+++-++++++++--+-	25.7		1.06161	4.18961	-7.15 , 9.2732	0.8	-++-	0		-7.86313	17.7059	-42.5668 , 26.8405	0.657	+-	0
cg09790270	1	SLC41A1	-80.8327	15.236	-110.6953 , -50.9701	1.124e-07	------+---+--+--	60.8		-4.30445	3.63596	-11.4309 , 2.822	0.2365	+---	42.3		-0.96276	8.84714	-18.3031 , 16.3776	0.9133	+-	0
cg09825327	1	TRAF5	101.46	17.1692	67.8087 , 135.1119	3.433e-09	+++++++-++-+--+-	0		4.31958	3.11964	-1.7949 , 10.4341	0.1662	++++	25.1		3.83242	13.7845	-23.1852 , 30.85	0.781	+-	6
cg09888330	1	SH2D2A	153.45	21.3949	111.5158 , 195.3839	7.377e-13	+++++++?++-+++++	0		14.8699	4.09416	6.8453 , 22.8944	0.0002813	++--	65.3		-9.24311	11.8715	-32.5113 , 14.0251	0.4362	-+	68.2
cg09915396	17	RAP1GAP2	-87.099	13.7166	-113.9837 , -60.2144	2.155e-10	---------+---+--	26.7		-10.6331	3.43592	-17.3675 , -3.8987	0.00197	----	71.1		-1.6782	9.70092	-20.692 , 17.3356	0.8627	--	0
cg09935388	1	GFI1	24.5742	4.7894	15.187 , 33.9614	2.883e-07	+++++++?++++++++	38.7		0.37794	1.98191	-3.5066 , 4.2625	0.8488	+-++	57.1		6.44707	4.08638	-1.5622 , 14.4564	0.1146	+-	90.6
cg09990613	20	TCEA2	66.1658	14.6506	37.4507 , 94.8809	6.294e-06	++++++-++++++-++	23.9		8.35087	4.83346	-1.1227 , 17.8245	0.08404	++-+	0		1.49129	6.8308	-11.8971 , 14.8797	0.8272	+-	42.5
cg10073091	1	DHCR24	-189.24	25.4618	-239.1456 , -139.3353	1.067e-13	----------+--+--	0		-9.27207	9.29891	-27.4979 , 8.9538	0.3187	----	0		-8.8132	12.2924	-32.9063 , 15.2799	0.4734	--	0
cg10078415	16	ACSM3	-59.1145	9.9726	-78.6608 , -39.5682	3.072e-09	---+------+--+--	34.1		-8.98289	2.72815	-14.3301 , -3.6357	0.0009924	--+-	57.5		1.9627	4.48055	-6.8192 , 10.7446	0.6614	++	0
cg10084993	16	SLC9A3R2	49.2328	11.5429	26.6086 , 71.857	1.997e-05	+++++++-+++++-++	28.7		5.84353	2.61755	0.7131 , 10.9739	0.02559	++++	38.5		-16.453	9.09303	-34.2754 , 1.3693	0.07039	--	0
cg10090414	8	LINC01300	28.9947	6.95717	15.3587 , 42.6308	3.078e-05	++++++++++-++++-	4.2		4.98441	2.09356	0.881 , 9.0878	0.01727	++++	0		5.70553	5.19465	-4.476 , 15.8871	0.2721	++	0
cg10117369	1	LAX1	-75.2925	10.8139	-96.4877 , -54.0973	3.341e-12	------+------+--	0		-1.67763	2.54067	-6.6573 , 3.3021	0.5091	-+--	89.4		-8.0382	7.70075	-23.1317 , 7.0553	0.2966	--	14.5
cg10147974	12	WNT5B	-43.0098	10.4352	-63.4627 , -22.5568	3.762e-05	------+-----++--	43.2		-5.04993	2.88366	-10.7019 , 0.602	0.07991	+-+-	77.1		-3.41474	10.9901	-24.9553 , 18.1258	0.756	-+	51.7
cg10173172	8	TMEM65	94.0902	15.1768	64.3436 , 123.8367	5.661e-10	+++-+-++++++-+++	12		2.76016	3.54769	-4.1933 , 9.7136	0.4366	++-+	0		15.6672	14.8465	-13.4319 , 44.7664	0.2913	-+	0
cg10181414	19	GNG7	52.9909	9.83744	33.7095 , 72.2723	7.178e-08	+++++++?+++++++-	0		3.9102	2.24432	-0.4887 , 8.3091	0.08146	++++	13.7		9.47645	6.30171	-2.8749 , 21.8278	0.1326	++	53.6
cg10317026	1	EFNA3	-156.007	23.0331	-201.1516 , -110.8617	1.26e-11	--+---++--------	48.1		-26.5267	6.9939	-40.2347 , -12.8186	0.0001489	----	49		-23.5907	14.1319	-51.2892 , 4.1078	0.09505	--	0
cg10322443	14	MIR4708	92.1024	16.8847	59.0085 , 125.1963	4.903e-08	++++++-+++++-+-+	59.6		10.8756	4.03121	2.9744 , 18.7767	0.006979	++++	0		2.72755	8.66153	-14.2491 , 19.7042	0.7528	++	0
cg10372921	15	LOXL1-AS1	99.265	12.0169	75.7118 , 122.8181	1.451e-16	+++++++-++++-+++	0		1.11795	3.92772	-6.5804 , 8.8163	0.7759	++--	0		1.70585	8.98731	-15.9093 , 19.321	0.8495	+-	52.9
cg10397819	14	EIF2B2	118.257	21.5421	76.0347 , 160.4799	4.029e-08	++++++-?++++++++	33.1		5.48053	2.79184	0.0085 , 10.9525	0.04964	++++	0		6.247	18.493	-29.9992 , 42.4932	0.7355	-+	0
cg10420527	11	LRP5	75.8625	16.1983	44.1139 , 107.6111	2.822e-06	++++++++++++++++	61.2		8.74099	4.03989	0.8228 , 16.6592	0.03049	++++	58.6		-5.66848	12.6878	-30.5366 , 19.1997	0.655	--	0
cg10421188	7	CREB5	-61.8173	12.5753	-86.4649 , -37.1697	8.843e-07	-+-----------+--	35.3		-12.1439	4.39156	-20.7513 , -3.5364	0.005687	----	61		-24.71	20.3338	-64.5643 , 15.1442	0.2243	--	11.3
cg10423607	8	CPA6	-42.9596	10.5149	-63.5688 , -22.3504	4.397e-05	--?+--+?--?----?	33.5		-3.54289	1.78459	-7.0407 , -0.0451	0.04711	--+-	61.9		-7.57705	5.07329	-17.5207 , 2.3666	0.1353	--	0
cg10430742	11	KCNJ1	-65.5636	12.7734	-90.5994 , -40.5278	2.854e-07	------+-----+---	0		-1.67172	3.84737	-9.2126 , 5.8691	0.6639	+--+	0		4.88481	14.1142	-22.779 , 32.5487	0.7293	+-	10.7
cg10453071	16	DOK4	94.5852	14.2822	66.592 , 122.5784	3.53e-11	+++++++-+++++-+-	3.9		5.04847	4.19916	-3.1819 , 13.2788	0.2293	++++	0		9.10201	8.01587	-6.6091 , 24.8131	0.2562	+-	0
cg10469774	11	CD82	85.9531	16.2994	54.0061 , 117.9	1.339e-07	++++++++++-+++-+	53.1		8.43299	4.24711	0.1087 , 16.7573	0.04708	++++	14.8		21.6468	13.8453	-5.49 , 48.7836	0.1179	++	0
cg10547908	15	FAM174B	94.6086	17.3413	60.6197 , 128.5975	4.878e-08	++-+++--+++++-+-	52.6		3.41809	5.30838	-6.9863 , 13.8225	0.5196	-+++	43		20.4809	21.0355	-20.7487 , 61.7105	0.3302	++	0
cg10576725	14	MMP14	-73.0347	16.1378	-104.6648 , -41.4047	6.02e-06	---+--+---------	0		-8.39255	5.11226	-18.4126 , 1.6275	0.1007	----	0		3.88204	7.11234	-10.0581 , 17.8222	0.5852	++	0
cg10583311	12	FBRSL1	68.4407	11.8937	45.129 , 91.7524	8.697e-09	+++++++-++-++-+-	57.7		0.677035	3.8687	-6.9056 , 8.2597	0.8611	+++-	0		-9.27012	11.9386	-32.6697 , 14.1294	0.4375	+-	0
cg10601624	12	PLEKHG6	-41.9308	10.4258	-62.3654 , -21.4961	5.775e-05	------+--+--+---	23.1		-0.99696	3.22267	-7.3134 , 5.3195	0.757	+++-	10.6		-14.9748	9.44533	-33.4876 , 3.5381	0.1129	--	0
cg10615591	20	RTEL1-TNFRSF6B	66.3074	17.5611	31.8878 , 100.7271	0.0001595	++++++-?+-+++-++	35.9		12.7462	5.46128	2.0421 , 23.4503	0.0196	++++	0		14.6663	5.86229	3.1762 , 26.1564	0.01236	++	0
cg10665891	12	MAP1LC3B2	-35.6949	6.86384	-49.148 , -22.2417	1.988e-07	------------++--	0		-5.10263	1.75918	-8.5506 , -1.6546	0.003725	----	57.4		-5.18913	8.85632	-22.5475 , 12.1693	0.5579	--	0
cg10670376	5	ARHGAP26	-148.801	24.7709	-197.3518 , -100.2499	1.889e-09	--------------+-	25.7		-2.53961	7.35449	-16.9544 , 11.8752	0.7299	---+	0		-5.39507	26.9285	-58.175 , 47.3848	0.8412	-+	0
cg10671066	1	SLAMF6	-79.7193	16.7511	-112.5515 , -46.887	1.945e-06	--------+-------	25.6		-9.09539	4.05672	-17.0466 , -1.1442	0.02496	----	35.3		-21.4809	10.3862	-41.8379 , -1.1239	0.03862	--	0
cg10735015	6	PHACTR2	-36.7987	7.22629	-50.9623 , -22.6352	3.537e-07	------+--++-----	61.7		-3.01808	2.20332	-7.3366 , 1.3004	0.1708	--+-	13.3		-18.0591	7.78187	-33.3115 , -2.8066	0.02031	--	0
cg10755899	4	FGFR3	69.5501	13.0763	43.9205 , 95.1797	1.045e-07	++++++++++-++++-	0		2.31441	3.02129	-3.6073 , 8.2361	0.4437	+-++	0		1.23732	6.22028	-10.9544 , 13.4291	0.8423	+-	0
cg10780778	6	BTN3A2	-52.0093	10.8371	-73.25 , -30.7687	1.593e-06	-------+--+---+-	30.1		-9.61615	5.93609	-21.2509 , 2.0186	0.1052	-?+-	47.1		10.7724	13.1999	-15.0993 , 36.6441	0.4144	++	0
cg10814005	14	GPR68	91.2413	17.9714	56.0173 , 126.4652	3.834e-07	++++++--++++-+++	46.6		5.05482	6.71041	-8.0976 , 18.2072	0.4513	+-+-	0		2.72373	8.80604	-14.5361 , 19.9836	0.7571	++	0
cg10829227	19	PRKD2	101.842	13.3058	75.7623 , 127.921	1.949e-14	+++++++++++++++-	7.9		7.6408	3.53659	0.7091 , 14.5725	0.03073	++++	0		-2.22072	8.60605	-19.0886 , 14.6471	0.7964	+-	2.1
cg10902738	8	ST3GAL1	-49.585	10.0519	-69.2868 , -29.8833	8.102e-07	------++-----+--	0		-5.87437	3.16424	-12.0763 , 0.3275	0.06338	----	0		8.71395	10.5504	-11.9649 , 29.3928	0.4088	++	0
cg10905180	11	OR51E2	-33.1685	6.60895	-46.122 , -20.2149	5.202e-07	----+--?-+------	23		-3.15277	1.33778	-5.7748 , -0.5307	0.01844	--+-	36.4		1.6969	5.83072	-9.7313 , 13.1251	0.771	-+	17.7
cg10928544	14	CCDC88C	36.962	9.36157	18.6133 , 55.3106	7.872e-05	++++++--+-+++++-	0		8.12301	2.86695	2.5038 , 13.7422	0.004607	++-+	44.2		9.67736	12.0936	-14.0261 , 33.3809	0.4236	++	0
cg10950251	1	PIK3C2B	-64.4819	10.312	-84.6934 , -44.2704	4.024e-10	-------+--------	32.1		-3.58972	2.69269	-8.8674 , 1.688	0.1825	-++-	62.7		-1.06838	10.2812	-21.2195 , 19.0827	0.9172	--	0
cg11036672	4	TRMT44	76.848	14.8328	47.7757 , 105.9203	2.208e-07	+-+++++-++-++-++	4.5		6.21762	4.44754	-2.4996 , 14.9348	0.1621	++-+	0		14.4213	16.1615	-17.2553 , 46.098	0.3722	+-	49.1
cg11046602	17	SPOP	-80.6819	15.0089	-110.0993 , -51.2645	7.632e-08	-------?--+--+--	54.8		-7.7272	3.55794	-14.7008 , -0.7536	0.02987	----	0		-24.9404	14.5314	-53.422 , 3.5411	0.0861	--	21.9
cg11067407	11	ZW10	-68.8165	11.9163	-92.1725 , -45.4605	7.696e-09	-------?-----+--	0		-2.14419	2.64367	-7.3258 , 3.0374	0.4173	---+	0		5.04426	11.5655	-17.6241 , 27.7126	0.6627	+-	16
cg11077681	11	MRVI1	101.304	15.6343	70.6608 , 131.9471	9.196e-11	++++++++++++-+++	19.8		4.20557	4.64831	-4.9051 , 13.3163	0.3656	+-++	0		2.61957	9.33236	-15.6719 , 20.911	0.7789	-+	0
cg11115622	14	PLEKHG3	-64.8592	13.0541	-90.4452 , -39.2731	6.748e-07	--+--++--+------	14.2		-17.5913	5.25655	-27.8941 , -7.2884	0.0008183	-?--	0		-16.0365	15.4893	-46.3956 , 14.3227	0.3005	--	0
cg11125758	14	SEL1L	47.3678	9.12887	29.4752 , 65.2604	2.117e-07	+++++++-+++++-++	23.8		3.12071	2.02604	-0.8503 , 7.0917	0.1235	++++	0		4.83048	7.62939	-10.1231 , 19.7841	0.5266	+-	63.1
cg11138362	1	PRDM16	104.008	12.9245	78.6757 , 129.3397	8.462e-16	+++++++?++++--+-	47.6		14.4633	5.14259	4.3838 , 24.5428	0.004917	+?++	0		4.80572	12.4448	-19.5861 , 29.1975	0.6994	++	0
cg11261850	11	LRRC32	68.4354	12.9041	43.1435 , 93.7274	1.137e-07	+++++++-++++-+++	6.9		8.29868	3.57126	1.299 , 15.2984	0.02014	++++	0		1.73016	7.20196	-12.3857 , 15.846	0.8101	-+	0
cg11268834	2	MRPL44	101.088	13.6909	74.2536 , 127.9221	1.541e-13	+++-++-+++++-+++	31.7		5.29152	3.53255	-1.6323 , 12.2153	0.1342	+-++	16.8		10.0256	8.65649	-6.9412 , 26.9923	0.2468	-+	28.4
cg11294761	17	CD7	95.6957	20.0815	56.336 , 135.0553	1.885e-06	++++++--++++++++	19.1		12.6514	4.57477	3.6849 , 21.618	0.005684	++++	0		8.0308	8.68179	-8.9855 , 25.0471	0.355	+-	79.8
cg11303839	7	CCL26	-49.8911	6.33873	-62.315 , -37.4672	3.523e-15	----------------	0		-5.11421	2.00793	-9.0498 , -1.1787	0.01087	-+--	18.9		0.100224	4.26947	-8.2679 , 8.4684	0.9813	+-	0
cg11323439	11	CREB3L1	-71.0425	15.4023	-101.2309 , -40.8541	3.979e-06	--+---+-----+---	41.4		-5.19735	3.61663	-12.286 , 1.8912	0.1507	---+	24.5		5.63256	10.8419	-15.6176 , 26.8827	0.6034	+-	72.2
cg11334730	6	LY86	69.0469	13.1942	43.1863 , 94.9076	1.667e-07	+++++++?++++++-+	55.3		7.94597	3.75711	0.582 , 15.3099	0.03444	++++	0		6.09856	10.3218	-14.1322 , 26.3293	0.5546	-+	0
cg11368628	11	SYT8	-68.6664	13.3287	-94.7907 , -42.5422	2.58e-07	-------?--------	42.5		-5.96838	2.99028	-11.8293 , -0.1074	0.04594	----	56.4		-11.9583	13.3248	-38.0748 , 14.1583	0.3695	+-	62.5
cg11370064	3	ROBO1	59.2249	9.29708	41.0027 , 77.4472	1.887e-10	++++++++++++-+++	32.6		6.783	2.67934	1.5315 , 12.0345	0.01135	++-+	74		9.36729	5.51067	-1.4336 , 20.1682	0.08916	++	0
cg11417612	12	BTBD11	-69.3919	15.5934	-99.9548 , -38.8289	8.583e-06	-+----++--------	18.2		-5.42476	3.31841	-11.9288 , 1.0793	0.1021	----	74.7		-53.9677	15.3284	-84.0113 , -23.9241	0.0004303	--	68.7
cg11474701	11	SC5D	-52.5678	9.33679	-70.8679 , -34.2677	1.8e-08	-+----+---+-----	47.5		-4.70522	2.24386	-9.1032 , -0.3073	0.036	--+-	52.7		-6.00941	10.71	-27.0009 , 14.9821	0.5747	+-	0
cg11539055	4	ANTXR2	61.4646	12.5775	36.8128 , 86.1164	1.024e-06	++++++-?++++--++	18.4		4.81862	4.38185	-3.7698 , 13.407	0.2715	++++	29.2		28.453	16.5758	-4.0355 , 60.9416	0.08606	++	0
cg11659663	11	MACROD1	-65.2446	12.3567	-89.4638 , -41.0254	1.291e-07	--+----?--------	33.1		-5.89674	3.31051	-12.3853 , 0.5919	0.07488	----	0		-4.33205	14.2442	-32.2507 , 23.5866	0.761	-+	0
cg11701868	19	UHRF1	75.6968	12.7151	50.7751 , 100.6184	2.628e-09	?+++++-++++++?-?	38.6		1.54518	2.84138	-4.0239 , 7.1143	0.5866	++++	0		0.1233	6.12162	-11.8751 , 12.1217	0.9839	-+	11.2
cg11835355	22	APOL3	-80.6261	15.9319	-111.8526 , -49.3995	4.178e-07	------+?-----+--	34.8		-7.46805	3.61064	-14.5449 , -0.3912	0.03861	----	0		7.9446	13.8025	-19.1084 , 34.9976	0.5649	++	0
cg11854981	6	TRERF1	-48.6875	9.51741	-67.3416 , -30.0334	3.127e-07	----+-+?-+---+--	58.8		-6.16572	2.06385	-10.2109 , -2.1206	0.002813	----	51.6		-13.2867	11.1728	-35.1854 , 8.6119	0.2344	+-	51.9
cg11935041	5	FAT2	-60.6349	13.7218	-87.5296 , -33.7402	9.921e-06	-----+------+---	0		-17.1867	7.50203	-31.8906 , -2.4827	0.02197	-?-+	71		-24.2254	15.9748	-55.536 , 7.0851	0.1294	--	0
cg11950754	1	LRP8	81.4988	12.1043	57.7743 , 105.2232	1.662e-11	+++++++++++++-++	39.5		1.66364	4.00663	-6.1894 , 9.5166	0.678	+-++	0		-18.0282	10.3388	-38.2921 , 2.2358	0.0812	--	34.6
cg12036877	1	PMF1-BGLAP	83.6318	10.8045	62.455 , 104.8086	9.906e-15	+++++++++++++-+-	2.9		-2.76586	3.59123	-9.8047 , 4.273	0.4412	---+	0		-4.48958	6.89378	-18.0014 , 9.0222	0.5149	+-	68
cg12048965	10	KLF6	-34.3146	7.80803	-49.6183 , -19.0109	1.109e-05	--+-----+---++--	40.7		-7.54494	4.11734	-15.6149 , 0.525	0.06688	-?--	0		-8.49838	5.93837	-20.1376 , 3.1408	0.1524	--	0
cg12050271	1	LINC00982	37.971	7.7627	22.7561 , 53.1859	1.001e-06	++-++++?+++++-++	11.4		8.21715	3.38416	1.5842 , 14.8501	0.01518	++++	0		19.5507	18.7282	-17.1565 , 56.2579	0.2965	-+	0
cg12065777	17	TRPV2	-57.7428	11.3009	-79.8925 , -35.5931	3.229e-07	------+?-+--+---	37.2		-3.55587	6.22403	-15.755 , 8.6432	0.5678	-?-+	0		-11.7779	7.24375	-25.9756 , 2.4199	0.104	--	0
cg12103569	12	SFSWAP	49.6671	10.8542	28.3928 , 70.9413	4.743e-06	++++++--++++-+++	5.2		2.1764	3.09337	-3.8866 , 8.2394	0.4817	++-+	0		16.1753	8.05467	0.3881 , 31.9624	0.04462	++	0
cg12127149	14	DYNC1H1	55.3247	11.2282	33.3174 , 77.3319	8.337e-07	+-+++++-++++-+-+	48.9		-1.87911	3.20317	-8.1573 , 4.3991	0.5574	-+--	36.5		4.55195	11.6786	-18.3382 , 27.4421	0.6967	++	0
cg12149606	14	TMED10	56.5129	9.75193	37.3991 , 75.6267	6.83e-09	+++++++?+++++++-	43.2		0.558338	2.46405	-4.2712 , 5.3879	0.8207	+--+	28.3		11.2717	8.6916	-5.7638 , 28.3073	0.1947	++	0
cg12158889	2	SUCLG1	-62.7527	11.6636	-85.6134 , -39.8921	7.44e-08	-------------+--	53.8		-3.90429	3.07097	-9.9234 , 2.1148	0.2036	----	54		-1.79831	11.3298	-24.0048 , 20.4082	0.8739	+-	0
cg12160087	12	CCDC64	76.3443	14.0212	48.8627 , 103.8258	5.183e-08	+-+-+--?++++++++	18.9		2.80871	3.00037	-3.072 , 8.6894	0.3492	-+--	64.7		-6.4308	10.0561	-26.1407 , 13.2791	0.5225	--	0
cg12233463	15	TMC3	-37.5357	8.62828	-54.4471 , -20.6243	1.359e-05	--++--+---+--+-?	32.8		-9.36626	2.46172	-14.1912 , -4.5413	0.0001419	--+-	66.4		9.95309	7.64188	-5.025 , 24.9312	0.1928	++	0
cg12259522	13	TEX29	90.0704	16.2418	58.2366 , 121.9043	2.929e-08	+-++++++++-+--++	32.5		9.78708	4.11911	1.7136 , 17.8605	0.0175	++++	0		15.498	9.58057	-3.2799 , 34.2759	0.1057	++	16.2
cg12341429	2	TANK	-100.391	18.6928	-137.0293 , -63.7534	7.848e-08	-----++?--------	0		-10.1155	5.11025	-20.1316 , -0.0994	0.04777	----	54.6		-29.1819	17.4543	-63.3923 , 5.0286	0.09454	--	0
cg12374579	17	ASPSCR1	53.6834	10.3656	33.3667 , 74	2.231e-07	++++++-?++++++++	60.1		2.76192	2.53589	-2.2084 , 7.7323	0.2761	++++	0		-3.92009	9.90568	-23.3352 , 15.495	0.6923	--	0
cg12403889	1	DRAXIN	-90.4849	17.0256	-123.8551 , -57.1148	1.069e-07	----------+--+--	11.5		-8.73246	3.83574	-16.2505 , -1.2144	0.02281	--+-	68.5		-3.69978	14.0424	-31.2228 , 23.8233	0.7922	--	0
cg12419863	6	PLAGL1	-68.1998	11.4117	-90.5668 , -45.8329	2.282e-09	-------?--------	22.3		-7.33393	4.08722	-15.3449 , 0.677	0.07276	+---	45.9		-9.98508	10.2389	-30.0533 , 10.0832	0.3295	+-	72.6
cg12434362	5	MIR583	-39.8604	9.46637	-58.4145 , -21.3063	2.545e-05	--+----------+--	25.1		-4.22264	2.30075	-8.7321 , 0.2868	0.06646	--+-	47.1		1.77766	7.2029	-12.34 , 15.8953	0.8051	-+	0
cg12532095	6	LINC00473	64.9211	12.3336	40.7472 , 89.095	1.411e-07	+++++++-+++++-++	0		5.37075	4.4933	-3.4361 , 14.1776	0.232	++-+	0		15.4634	12.8767	-9.775 , 40.7019	0.2298	++	0
cg12547807	1	SPSB1	-94.7031	16.8825	-127.7928 , -61.6134	2.029e-08	----------+--+--	26.3		-13.6934	4.45775	-22.4306 , -4.9563	0.002128	-++-	81.4		-7.54604	10.5075	-28.1407 , 13.0486	0.4727	--	0
cg12562461	17	PLEKHM1P	91.243	15.6877	60.495 , 121.9909	6.02e-09	++-++++++++++-+-	63.5		8.62151	4.46209	-0.1242 , 17.3672	0.05334	++++	8.8		7.8454	15.812	-23.1462 , 38.837	0.6198	+-	53.5
cg12593793	1	LMNA	-106.772	18.9058	-143.827 , -69.7164	1.627e-08	-------------+--	22.6		0.12912	4.66131	-9.0071 , 9.2653	0.9779	-++-	0		-0.27909	10.1735	-20.2192 , 19.661	0.9781	-+	1.4
cg12594244	15	LOXL1-AS1	124.673	17.6614	90.0569 , 159.2896	1.676e-12	+++++++-++++++++	10.3		2.24009	3.66592	-4.9451 , 9.4253	0.5412	++++	0		2.40568	9.28204	-15.7871 , 20.5985	0.7955	+-	0
cg12655416	17	ORMDL3	102.195	20.2327	62.5385 , 141.8509	4.396e-07	++++++++++++-+++	0		7.51018	5.53217	-3.3329 , 18.3532	0.1746	++++	0		18.2518	10.1366	-1.616 , 38.1196	0.07177	+-	43.8
cg12723026	1	KCNC4	68.1375	7.95548	52.5447 , 83.7302	1.082e-17	++++++++++++-++-	54.6		7.40281	3.07047	1.3847 , 13.4209	0.01591	++++	13.3		8.95824	8.03315	-6.7867 , 24.7032	0.2648	++	0
cg12750675	7	BRAF	-68.8688	10.9207	-90.2734 , -47.4643	2.859e-10	-----+-+-----+--	50.5		-7.40278	3.15292	-13.5825 , -1.2231	0.01888	----	0		0.73535	12.6376	-24.0344 , 25.5051	0.9536	++	0
cg12781678	7	C7orf61	88.047	11.7843	64.9498 , 111.1443	7.926e-14	+++++++-+++++++-	0		9.21821	3.58602	2.1896 , 16.2468	0.01015	++++	51.2		-13.2384	11.7205	-36.2106 , 9.7338	0.2587	--	25.7
cg12798040	14	XRCC3	109.211	11.2758	87.1104 , 131.3116	3.478e-22	+++++++++++++-++	42.6		8.27614	3.38466	1.6422 , 14.9101	0.01448	+-++	82.8		18.5449	11.5799	-4.1517 , 41.2416	0.1093	++	0
cg12801067	12	LOC728084	-63.1073	12.749	-88.0954 , -38.1193	7.422e-07	----------------	38.8		-1.67551	5.34695	-12.1555 , 8.8045	0.754	--+-	0		16.6252	18.2883	-19.2198 , 52.4702	0.3633	++	0
cg12804755	11	SOX6	-60.9264	8.31933	-77.2322 , -44.6205	2.416e-13	-------------+--	6.1		0.254653	2.51495	-4.6747 , 5.184	0.9193	-++-	75.7		-7.18317	7.13126	-21.1604 , 6.7941	0.3138	--	0
cg12876356	1	GFI1	20.8617	3.9655	13.0894 , 28.6341	1.434e-07	+++++++?+++++++-	39.2		1.72996	2.08801	-2.3625 , 5.8225	0.4074	+-++	28.6		8.78962	5.05419	-1.1166 , 18.6958	0.08202	+-	82.4
cg12949547	12	XRCC6BP1	-79.2	15.091	-108.7784 , -49.6215	1.536e-07	------+------+--	19.5		-6.33982	4.929	-16.0007 , 3.321	0.1984	----	0		4.4118	10.3033	-15.7826 , 24.6062	0.6685	-+	10.3
cg13009654	5	EGR1	117.392	21.8036	74.6567 , 160.127	7.283e-08	+++-++++++++++--	47.3		3.41677	4.46095	-5.3267 , 12.1602	0.4437	+++-	0		15.0059	12.9056	-10.289 , 40.3009	0.2449	++	0
cg13065228	8	FOXH1	-31.446	6.75215	-44.6802 , -18.2118	3.206e-06	-------+-----+--	57.4		-2.83315	1.90338	-6.5638 , 0.8975	0.1366	----	0		11.6158	9.69753	-7.3913 , 30.623	0.231	++	0
cg13149245	15	PIF1	-44.7905	10.2661	-64.9121 , -24.6689	1.283e-05	-------------++-	37.7		-11.7508	2.39783	-16.4505 , -7.0511	9.554e-07	----	32.7		-14.7393	12.0914	-38.4384 , 8.9599	0.2228	--	0
cg13182599	14	ZFP36L1	-86.8491	17.0907	-120.3468 , -53.3513	3.742e-07	----------+----+	12.6		-6.34683	3.63694	-13.4752 , 0.7816	0.08097	----	63		-9.61265	9.20382	-27.6521 , 8.4268	0.2963	+-	74.7
cg13203135	21	C21orf33	52.8908	8.74491	35.7508 , 70.0309	1.465e-09	++++++-+++++++++	26.9		-1.01332	2.46612	-5.8469 , 3.8203	0.6811	++--	15.4		5.71391	8.92964	-11.7882 , 23.216	0.5222	++	0
cg13222915	1	C1orf21	-68.7544	13.0872	-94.4054 , -43.1034	1.492e-07	----+--?--------	18.2		-6.19611	3.33375	-12.7303 , 0.338	0.06308	--+-	66.2		-28.3127	15.1066	-57.9216 , 1.2962	0.0609	--	0
cg13251842	22	MIRLET7BHG	52.7019	9.44232	34.195 , 71.2088	2.385e-08	+++++++?++-++++-	19.7		3.22458	2.02113	-0.7368 , 7.186	0.1106	++-+	85		1.97809	7.39024	-12.5068 , 16.463	0.789	-+	43.1
cg13280041	6	NHSL1	97.2142	11.2338	75.1959 , 119.2325	4.986e-18	++++++++++++++++	0		5.14351	3.34304	-1.4089 , 11.6959	0.1239	++-+	0		6.56053	11.05	-15.0974 , 28.2185	0.5527	++	0
cg13282594	1	PMF1-BGLAP	92.1723	14.6917	63.3765 , 120.968	3.524e-10	+++++++?+++++-+-	63		3.05436	4.10873	-4.9988 , 11.1075	0.4573	-+-+	0		-25.2106	13.6736	-52.0109 , 1.5896	0.06522	--	0
cg13425938	9	EGFL7	73.1645	15.1284	43.5127 , 102.8162	1.323e-06	++++++-?+++++-++	2.1		2.99709	3.38224	-3.6321 , 9.6263	0.3756	-+++	0		10.6131	8.83843	-6.7102 , 27.9364	0.2298	+-	82.3
cg13430173	9	PALM2-AKAP2	-79.0402	17.0739	-112.505 , -45.5755	3.669e-06	------+--+----+-	17.2		-6.63192	5.21621	-16.8557 , 3.5918	0.2036	+---	39.4		-42.2374	18.1397	-77.7913 , -6.6836	0.01989	--	0
cg13430552	2	DNMT3A	62.6997	12.0102	39.1597 , 86.2398	1.784e-07	+++++++++++++-++	33.8		8.92662	3.42669	2.2103 , 15.6429	0.009187	+++-	52		-13.0543	10.9585	-34.5329 , 8.4243	0.2336	--	13.9
cg13458609	9	ENG	-49.0181	12.384	-73.2908 , -24.7454	7.553e-05	---+-----+--+-+-	34.1		-4.29812	4.72469	-13.5585 , 4.9623	0.363	--+-	0		-35.5826	16.7926	-68.4961 , -2.669	0.0341	--	77.8
cg13472584	1	PRDM2	-70.4073	13.0914	-96.0665 , -44.7482	7.526e-08	-------------+--	34.7		-5.40296	2.58959	-10.4786 , -0.3274	0.03694	----	63.3		8.17349	7.77279	-7.0612 , 23.4082	0.293	++	0
cg13492133	1	SMG7	82.1617	10.4879	61.6055 , 102.718	4.727e-15	++++++++++-+++++	14.8		4.35155	2.29328	-0.1433 , 8.8464	0.05776	++-+	49.1		6.47663	8.03434	-9.2707 , 22.2239	0.4202	++	0
cg13563026	4	ATP10D	-53.3413	11.0985	-75.0944 , -31.5882	1.539e-06	------+--+---+-+	45.4		-3.68337	3.10513	-9.7694 , 2.4027	0.2355	+-+-	59.9		2.28639	8.11065	-13.6105 , 18.1833	0.778	-+	32
cg13586051	3	DNASE1L3	-88.4	11.0473	-110.0527 , -66.7472	1.225e-15	------+?--------	48.3		-5.86348	2.542	-10.8458 , -0.8812	0.02107	----	42.6		-8.55231	10.7925	-29.7055 , 12.6009	0.4281	--	0
cg13594630	12	KIAA1551	-77.9359	14.899	-107.138 , -48.7338	1.687e-07	-------?-----+--	0		-6.07471	2.77693	-11.5175 , -0.6319	0.0287	----	0		-2.8552	15.1544	-32.5579 , 26.8475	0.8506	+-	0
cg13594903	9	STOML2	116.951	23.5758	70.7422 , 163.1593	7.026e-07	+++-++-+++++--++	51.8		25.7061	6.53099	12.9053 , 38.5068	8.285e-05	+?+-	6.6		14.2544	7.97715	-1.3808 , 29.8896	0.07395	++	0
cg13597554	15	FAM227B	-54.0455	9.11375	-71.9084 , -36.1825	3.027e-09	---+-+----+--+-+	50.2		-6.99703	2.60171	-12.0964 , -1.8977	0.007158	--+-	67.6		-4.02569	4.78479	-13.4039 , 5.3525	0.4002	--	0
cg13598409	20	KCNK15	-93.3711	18.4136	-129.4616 , -57.2805	3.962e-07	---+--+-----+---	13.4		-9.28994	4.60914	-18.3239 , -0.256	0.04385	----	0		-4.47514	14.9308	-33.7395 , 24.7892	0.7644	+-	37.3
cg13599248	6	SLC17A5	-46.1893	8.48306	-62.8161 , -29.5625	5.184e-08	----------------	0		-4.25234	1.96612	-8.1059 , -0.3987	0.03056	----	0		-2.99128	4.60986	-12.0266 , 6.044	0.5164	-+	80
cg13601957	8	TOX	-70.7041	12.7675	-95.7284 , -45.6799	3.062e-08	--+---+---+--+--	60.3		-4.42805	3.75458	-11.787 , 2.9309	0.2382	----	0		2.20632	11.7092	-20.7438 , 25.1564	0.8505	++	0
cg13631444	8	TRHR	37.1733	8.38126	20.746 , 53.6006	9.195e-06	++-+++++++++++++	9.9		4.49187	2.18162	0.2159 , 8.7678	0.0395	++-+	0		13.2976	4.90179	3.6901 , 22.9051	0.006672	++	9.9
cg13638420	11	WT1	-62.7593	10.2103	-82.7714 , -42.7472	7.912e-10	------------++--	0		1.00595	2.72568	-4.3364 , 6.3483	0.7121	-+--	0		-1.19041	6.24519	-13.431 , 11.0502	0.8488	-+	0
cg13641903	11	WT1	-64.8476	10.7516	-85.9208 , -43.7745	1.625e-09	---+----------++	53		-1.61473	3.40668	-8.2918 , 5.0624	0.6355	--+-	0		-13.7863	10.7695	-34.8946 , 7.3219	0.2005	--	0
cg13687834	10	PITRM1	-47.9085	9.18836	-65.9176 , -29.8993	1.848e-07	---------------?	23.2		-5.98416	2.01209	-9.9279 , -2.0405	0.002939	----	52.8		-9.91752	6.30468	-22.2747 , 2.4396	0.1157	--	0
cg13696490	3	MIR548H2	-54.8371	9.70139	-73.8518 , -35.8224	1.581e-08	-----+-+--+--+--	24.2		-2.81475	2.84835	-8.3975 , 2.768	0.3231	--+-	19.4		-3.8408	7.95152	-19.4258 , 11.7442	0.6291	-+	0
cg13719443	6	LOC285847	98.3012	16.0489	66.8453 , 129.7571	9.063e-10	+++-+++?+++++-+-	59.3		1.77373	5.91825	-9.826 , 13.3735	0.7644	+?--	39.1		5.54184	10.6463	-15.3249 , 26.4086	0.6027	++	0
cg13725803	13	GUCY1B2	-53.4907	8.86403	-70.8642 , -36.1172	1.594e-09	------+?--+-----	0		-6.95329	3.02222	-12.8768 , -1.0297	0.02141	-?--	0		-3.29321	5.15936	-13.4056 , 6.8191	0.5233	--	0
cg13740339	9	FBP1	-92.7932	14.8115	-121.8238 , -63.7627	3.729e-10	--+-------------	0		-14.1375	4.08729	-22.1486 , -6.1264	0.0005424	----	51.6		-12.5555	7.4696	-27.1959 , 2.085	0.09279	--	0
cg13742400	2	DOCK10	-98.1946	13.3127	-124.2874 , -72.1017	1.631e-13	-+-+------------	37		-9.84739	4.24765	-18.1728 , -1.522	0.02043	----	0		8.98182	9.4989	-9.636 , 27.5997	0.3444	++	0
cg13758780	9	DAB2IP	118.175	13.4464	91.8197 , 144.5297	1.515e-18	+++++++?++++++++	43.3		7.83212	3.0479	1.8582 , 13.806	0.01018	++++	0		10.1188	9.32571	-8.1596 , 28.3971	0.2779	++	0
cg13827209	9	TGFBR1	89.647	19.2185	51.9787 , 127.3152	3.092e-06	+++-+++?++++++-+	14.8		10.2033	7.24889	-4.0046 , 24.4111	0.1593	++++	0		1.04183	8.45794	-15.5357 , 17.6194	0.902	-+	0
cg13869942	1	THEM4	-39.076	7.1468	-53.0837 , -25.0683	4.561e-08	-------?--+--+--	29.6		-3.02859	1.65938	-6.281 , 0.2238	0.06798	----	27.6		-0.242767	5.21952	-10.473 , 9.9875	0.9629	+-	0
cg13872898	2	GLI2	-26.7966	4.20508	-35.0385 , -18.5546	1.861e-10	------------++--	34.2		-0.675021	1.39506	-3.4093 , 2.0593	0.6285	---+	0		4.34655	3.23613	-1.9963 , 10.6894	0.1792	-+	12.4
cg13888509	15	STRA6	67.0921	12.5645	42.4656 , 91.7185	9.304e-08	++++++-+++++++--	23.8		8.27482	3.51138	1.3925 , 15.1571	0.01844	++-+	38		-10.316	9.48738	-28.9113 , 8.2793	0.2769	--	0
cg13904214	7	RBM33	98.3798	12.9506	72.9966 , 123.763	3.041e-14	++++++++++++++++	26.4		4.77095	4.03121	-3.1302 , 12.6721	0.2366	++-+	0		21.936	10.239	1.8675 , 42.0044	0.03216	++	0
cg13928490	13	GUCY1B2	-39.3679	7.91286	-54.8771 , -23.8587	6.519e-07	----------+-----	0		-6.79478	1.84905	-10.4189 , -3.1706	0.0002381	----	0		-8.14578	5.17112	-18.2812 , 1.9896	0.1152	--	0
cg13937905	12	RARG	96.3621	15.9313	65.1368 , 127.5874	1.461e-09	++++++++++-++++-	31.6		4.36887	6.23422	-7.8502 , 16.5879	0.4834	++++	0		-1.24073	16.6111	-33.7985 , 31.317	0.9405	-+	0
cg13951007	1	LOC728989	-78.8834	18.7641	-115.6611 , -42.1057	2.623e-05	---------+---+--	34.9		-12.0649	4.75949	-21.3935 , -2.7363	0.01125	----	68		-14.3457	17.8985	-49.4268 , 20.7353	0.4228	-+	86.2
cg13963033	5	2018-03-03	-43.202	10.463	-63.7095 , -22.6945	3.643e-05	------+?-+--+---	25.5		-5.28719	2.94524	-11.0599 , 0.4855	0.07263	--+-	81.4		-17.5481	13.6976	-44.3954 , 9.2991	0.2002	--	0
cg13993914	9	NELFB	88.7401	15.1632	59.0203 , 118.4599	4.847e-09	+-++++-?++++++++	54.3		0.878581	3.78097	-6.5321 , 8.2893	0.8163	++--	0		-20.4974	11.2361	-42.5201 , 1.5254	0.06812	--	0
cg13995854	7	ST7	-43.949	8.8027	-61.2023 , -26.6957	5.955e-07	---+---?--+-----	29.9		-3.9652	2.23898	-8.3536 , 0.4232	0.07656	----	0		-13.6891	8.893	-31.1194 , 3.7412	0.1237	--	62.3
cg14001239	10	PTCHD3P1	33.3813	7.45727	18.7651 , 47.9976	7.593e-06	+++++-+++++-+++-	9.6		3.24849	2.48253	-1.6173 , 8.1142	0.1907	+++-	3.5		8.24305	6.40722	-4.3151 , 20.8012	0.1983	++	0
cg14035521	9	POLR1E	150.452	21.9483	107.4336 , 193.4709	7.139e-12	+-+++++++++++-++	54.5		2.11148	5.71859	-9.097 , 13.3199	0.712	-+-+	0		1.02167	11.786	-22.079 , 24.1223	0.9309	-+	0
cg14071925	19	LILRA2	-70.7978	14.3586	-98.9407 , -42.655	8.194e-07	---+------+-----	61.2		-22.238	7.10529	-36.1644 , -8.3116	0.001749	-?--	0		0.703057	17.3503	-33.3036 , 34.7097	0.9677	+-	0
cg14090409	17	CCDC57	117.385	20.643	76.9247 , 157.8454	1.297e-08	++++++++++++-++-	9.8		25.3815	14.6028	-3.2401 , 54.0031	0.08219	+?++	0		-4.653	21.9249	-47.6257 , 38.3197	0.8319	--	0
cg14096899	2	LOC150935	57.7837	8.39866	41.3223 , 74.2451	5.981e-12	++++++++++-+++++	24.4		10.2905	3.44051	3.5471 , 17.0339	0.002781	++++	41.5		22.7459	11.982	-0.7389 , 46.2307	0.05765	++	0
cg14105680	2	IL37	-40.8248	10.1084	-60.6373 , -21.0122	5.375e-05	---+-++------+--	27.9		-16.3255	4.67504	-25.4886 , -7.1624	0.0004793	+?--	7.5		-6.02822	11.2172	-28.0139 , 15.9575	0.591	+-	0
cg14154456	6	IBTK	-37.3622	8.25251	-53.5371 , -21.1873	5.972e-06	---------++--+--	43.4		-3.43156	1.72961	-6.8216 , -0.0415	0.04725	--+-	28.1		-8.15732	4.00506	-16.0072 , -0.3074	0.04167	--	71
cg14161821	9	KDM4C	-43.9356	9.11612	-61.8032 , -26.068	1.439e-06	------+--++-----	54.9		-4.81231	2.34055	-9.3998 , -0.2248	0.03978	--+-	7.3		-11.7712	6.51638	-24.5433 , 1.0009	0.07086	--	68.7
cg14177925	14	OR4E2	-72.6305	12.7025	-97.5273 , -47.7337	1.079e-08	-------------+--	38.7		-8.75513	3.67001	-15.9484 , -1.5619	0.01705	----	46.8		3.05578	9.52163	-15.6066 , 21.7182	0.7483	-+	7.8
cg14184907	12	LINC00936	-97.0833	16.9779	-130.3601 , -63.8065	1.077e-08	--+---+------+--	38.4		-2.24489	4.6272	-11.3142 , 6.8244	0.6276	+-+-	0		0.194291	10.2299	-19.8563 , 20.2449	0.9848	-+	0
cg14195992	8	SPIDR	101.614	15.342	71.5432 , 131.6838	3.515e-11	+++++++-+++++-++	30		6.21261	4.08533	-1.7946 , 14.2199	0.1283	++++	53.2		19.8042	15.424	-10.4268 , 50.0353	0.1991	++	21.4
cg14209730	2	LGALSL	-95.7297	18.4098	-131.813 , -59.6464	1.994e-07	-------?--------	29.5		-1.68193	3.06407	-7.6875 , 4.3236	0.5831	-+-+	68.5		-14.8742	17.3074	-48.7967 , 19.0482	0.3901	--	0
cg14242936	12	GRASP	55.8127	9.0201	38.1333 , 73.4921	6.109e-10	+-+-+++-+++++-++	3.6		2.26944	2.79253	-3.2039 , 7.7428	0.4164	+-++	0		-0.273502	9.18332	-18.2728 , 17.7258	0.9762	+-	0
cg14251267	20	ZBTB46	29.9379	6.93231	16.3506 , 43.5253	1.57e-05	++++++--++-+++++	23		6.25554	2.35563	1.6385 , 10.8726	0.007917	++++	0		14.9985	5.36141	4.4901 , 25.5068	0.00515	++	0
cg14292823	8	TIGD5	134.217	19.4086	96.1766 , 172.2581	4.666e-12	++++++-+++++----	48.8		4.19128	4.02724	-3.7021 , 12.0847	0.298	+++-	0		-5.84447	15.6418	-36.5024 , 24.8135	0.7087	+-	60.2
cg14311362	2	GLI2	-44.8605	7.35489	-59.2761 , -30.4449	1.065e-09	------------++--	16.5		-2.03576	2.14759	-6.245 , 2.1735	0.3432	---+	46.3		7.55605	5.16953	-2.5762 , 17.6883	0.1438	-+	0
cg14387452	9	MLLT3	-65.0595	13.6492	-91.812 , -38.307	1.874e-06	----+++---+-----	48.8		-3.0067	3.11216	-9.1065 , 3.0931	0.334	--+-	0		-14.0517	15.0112	-43.4736 , 15.3702	0.3492	--	0
cg14397120	9	QSOX2	104.225	16.9966	70.912 , 137.5385	8.671e-10	++++++-+++++--+-	12.7		12.765	9.46401	-5.7844 , 31.3145	0.1774	+?++	0		12.521	21.0819	-28.7995 , 53.8415	0.5526	-+	0
cg14435807	15	LOXL1-AS1	122.475	17.1592	88.8425 , 156.1066	9.502e-13	++++++++++++++++	4		1.27826	3.96066	-6.4846 , 9.0411	0.7469	-+++	0		12.4974	10.237	-7.567 , 32.5619	0.2222	++	0
cg14459032	9	PCSK5	-82.8459	11.8363	-106.045 , -59.6468	2.572e-12	------------+---	0		-24.1898	4.67426	-33.3513 , -15.0282	2.278e-07	-?--	0		-10.0708	10.5158	-30.6818 , 10.5402	0.3382	--	0
cg14527110	5	P4HA2	-74.6899	17.6914	-109.3651 , -40.0148	2.423e-05	---------++--+--	15.7		-9.17552	3.80409	-16.6315 , -1.7195	0.01586	----	74.5		-16.8126	12.0296	-40.3906 , 6.7655	0.1622	+-	76.2
cg14541011	9	RALGDS	69.4107	12.8507	44.2233 , 94.5981	6.616e-08	++++++++++++-++-	55.7		2.18284	3.59843	-4.8701 , 9.2358	0.5441	-+-+	0		10.0393	12.6745	-14.8028 , 34.8813	0.4283	+-	0.2
cg14548802	9	COL5A1	64.3438	9.965	44.8124 , 83.8752	1.068e-10	++++++-+++++--++	40.3		2.99427	2.63347	-2.1673 , 8.1559	0.2555	+--+	53.5		4.09303	12.654	-20.7088 , 28.8949	0.7463	++	0
cg14550985	11	RIN1	85.6043	16.1882	53.8753 , 117.3332	1.236e-07	+++-+++-++++++++	0		5.22749	4.02379	-2.6591 , 13.1141	0.1939	++-+	17.6		-10.8664	11.3655	-33.1429 , 11.41	0.339	--	0
cg14704980	7	INHBA	-47.9206	9.9021	-67.3287 , -28.5125	1.302e-06	---------+---+--	15.5		-7.56519	2.59392	-12.6493 , -2.4811	0.00354	----	52.3		5.21898	6.72731	-7.9666 , 18.4045	0.4379	++	0
cg14717666	4	SYNPO2	-59.4532	10.1195	-79.2874 , -39.6191	4.225e-09	----+-+------+--	37.4		-9.61829	3.40674	-16.2955 , -2.9411	0.004753	----	0		-15.0654	14.4428	-43.3733 , 13.2425	0.2969	+-	56.4
cg14722693	8	CSGALNACT1	-81.5584	12.7431	-106.5349 , -56.5818	1.552e-10	------+--+------	37		-5.11782	3.05253	-11.1008 , 0.8651	0.09362	----	72.5		-17.4414	12.5577	-42.0545 , 7.1717	0.1649	--	0
cg14731462	10	PTPRE	-62.4898	11.9515	-85.9147 , -39.0649	1.708e-07	-------?-++-++--	4		-3.32666	2.16216	-7.5645 , 0.9112	0.1239	----	58.3		-12.8233	10.6016	-33.6024 , 7.9558	0.2264	+-	0
cg14751481	12	FBRSL1	59.9194	13.5475	33.3664 , 86.4724	9.737e-06	+-+++-+++++++-+-	17.3		13.2029	4.15126	5.0664 , 21.3394	0.00147	++++	0		16.7019	18.1023	-18.7787 , 52.1824	0.3562	++	0
cg14765414	13	MCF2L	101.291	16.9344	68.0995 , 134.4826	2.213e-09	++++++-+++++-++-	22.1		1.49923	3.8914	-6.1279 , 9.1264	0.7	-++-	0		3.80506	6.52338	-8.9808 , 16.5909	0.5597	++	0
cg14774305	5	WNT8A	-126.394	18.846	-163.3324 , -89.4559	1.991e-11	----------+-----	37.6		-16.4091	5.135	-26.4738 , -6.3445	0.001396	----	76.8		-0.227816	9.81313	-19.4615 , 19.0059	0.9815	+-	19.4
cg14785527	10	STAMBPL1	-57.08	11.6731	-79.9593 , -34.2008	1.009e-06	+-----+---+-----	23.8		-3.76534	2.77104	-9.1966 , 1.6659	0.1742	----	0		-13.2321	10.324	-33.4672 , 7.0029	0.2	--	0
cg14827643	4	RGS12	71.3183	12.8756	46.0822 , 96.5545	3.041e-08	++-++++++++++---	56.4		0.939616	4.08427	-7.0656 , 8.9448	0.818	+---	0		6.77456	11.6441	-16.0479 , 29.597	0.5607	+-	0
cg14827929	4	TLR3	67.2489	10.73	46.2182 , 88.2797	3.672e-10	++-++++++++++++-	0		1.44125	2.58891	-3.633 , 6.5155	0.5777	++--	7.1		5.30825	6.80363	-8.0269 , 18.6434	0.4353	++	0
cg14839898	11	TIMM8B	-158.724	28.7609	-215.0949 , -102.3524	3.414e-08	-------+--+---+-	52		-5.59658	7.92479	-21.1292 , 9.936	0.4801	+---	5.7		-17.6842	21.2462	-59.3268 , 23.9584	0.4052	--	0
cg14875081	2	DUSP2	94.9177	18.8639	57.9445 , 131.8909	4.861e-07	+++++++-+++--++-	42.2		4.18539	4.58136	-4.7941 , 13.1649	0.3609	++-+	12.9		1.95311	13.6679	-24.8361 , 28.7423	0.8864	-+	25.8
cg14909179	11	CHID1	35.4968	6.92189	21.9299 , 49.0637	2.925e-07	+++-++-+++++-?+?	48.2		1.86916	2.26778	-2.5757 , 6.314	0.4098	-+++	0		1.57748	6.60639	-11.371 , 14.526	0.8113	+-	0
cg14975410	3	TNIK	-48.4481	9.90143	-67.855 , -29.0413	9.929e-07	-----++---+--+--	54.4		-2.87627	3.00226	-8.7607 , 3.0082	0.338	-+--	55.5		1.42549	8.26296	-14.7699 , 17.6209	0.863	+-	67.6
cg14987354	14	LINC00911	-85.8212	17.4034	-119.932 , -51.7105	8.169e-07	---+---+----+---	0		-3.07072	5.17556	-13.2148 , 7.0734	0.553	+---	0		-2.10023	21.0127	-43.2851 , 39.0846	0.9204	+-	22.2
cg14992524	8	SOX7	77.2199	13.5163	50.7281 , 103.7118	1.109e-08	+++-+++?+++---++	39		2.09828	3.30891	-4.3872 , 8.5838	0.526	+++-	0		-9.78106	7.40221	-24.2894 , 4.7273	0.1864	-+	58.5
cg14994947	1	SLC30A7	-53.3993	12.6304	-78.1549 , -28.6436	2.36e-05	---+--++--------	0		-5.80827	3.79462	-13.2457 , 1.6292	0.1259	--+-	40.5		-7.55516	13.15	-33.3291 , 18.2188	0.5656	--	0
cg15013617	20	TMEM239	-44.3093	8.77466	-61.5077 , -27.111	4.425e-07	----+-+--++-----	43.9		-5.13535	2.31475	-9.6723 , -0.5984	0.02652	----	8.1		-7.73633	11.0772	-29.4477 , 13.975	0.4849	+-	0
cg15014975	1	RUNX3	39.368	7.43161	24.8021 , 53.934	1.175e-07	++++++++++-++-+-	33.4		7.85793	2.74565	2.4765 , 13.2394	0.00421	++-+	37.8		53.3513	42.395	-29.7429 , 136.4455	0.2082	-+	30.2
cg15016701	12	PPM1H	-50.3895	11.5701	-73.067 , -27.7121	1.33e-05	---------++--+--	36.9		-7.96015	2.71741	-13.2863 , -2.634	0.003397	----	71		-10.0439	6.06454	-21.9304 , 1.8427	0.09769	--	0
cg15031409	1	CASZ1	71.8704	15.0013	42.4678 , 101.2729	1.66e-06	+++++++++++++++-	44.7		5.75839	4.23012	-2.5326 , 14.0494	0.1734	-+++	0		10.3787	14.5103	-18.0615 , 38.8189	0.4744	-+	0
cg15035133	22	CDC42EP1	-81.7098	15.2521	-111.6039 , -51.8158	8.448e-08	-------------+--	26.3		-4.08709	3.66051	-11.2617 , 3.0875	0.2642	----	0		-2.5947	5.40936	-13.1971 , 8.0077	0.6315	--	0
cg15171911	18	TCF4	53.38	10.11	33.5644 , 73.1956	1.292e-07	++++++-+++++--++	13.8		4.25068	2.9927	-1.615 , 10.1164	0.1555	--++	43.6		5.54721	9.38945	-12.8561 , 23.9505	0.5547	++	0
cg15206445	16	SPG7	63.4001	14.4191	35.1387 , 91.6615	1.098e-05	+++-++--++-++-+-	36.6		4.66528	3.78036	-2.7442 , 12.0748	0.2172	+++-	25.3		-5.53743	8.79107	-22.7679 , 11.6931	0.5288	-+	61.8
cg15226659	19	SEMA6B	-52.6567	12.2017	-76.572 , -28.7415	1.592e-05	----------------	0		-2.50112	3.73767	-9.827 , 4.8247	0.5034	----	0		-4.26452	7.1184	-18.2166 , 9.6875	0.5491	+-	25.6
cg15233611	12	SETD1B	104.749	13.8358	77.6307 , 131.867	3.707e-14	+++-++++++++--+-	34.9		3.53343	3.63391	-3.589 , 10.6559	0.3309	+-++	26.7		0.019997	7.71814	-15.1075 , 15.1475	0.9979	+-	65.2
cg15283950	11	MRVI1	100.545	13.5122	74.0609 , 127.0287	9.989e-14	+++++++-++++-++-	16.9		3.28965	4.38959	-5.3139 , 11.8932	0.4536	+---	36.6		-16.1733	8.73818	-33.3001 , 0.9536	0.06419	--	0
cg15331996	10	ANAPC16	77.4312	17.2374	43.6458 , 111.2166	7.055e-06	+-++++++++++++++	33.2		8.82391	5.24205	-1.4505 , 19.0983	0.09232	++-+	8.7		11.4974	16.3421	-20.5331 , 43.5279	0.4817	++	0
cg15406387	4	ENPEP	-58.3751	11.8579	-81.6166 , -35.1337	8.527e-07	+--+---+-----+--	47.2		-1.924	3.29512	-8.3824 , 4.5344	0.5593	++--	23.7		-5.7964	6.75205	-19.0304 , 7.4376	0.3906	-+	56.7
cg15446391	11	WT1	-67.1942	11.6301	-89.9892 , -44.3992	7.577e-09	--++--------+---	0		1.60894	2.7372	-3.756 , 6.9739	0.5567	-++-	0		-4.73633	5.71793	-15.9435 , 6.4708	0.4075	--	0
cg15513620	1	ZNF697	-88.2895	18.4515	-124.4544 , -52.1246	1.71e-06	--+---+---+-----	14.7		-6.4051	4.16362	-14.5658 , 1.7556	0.124	--+-	61.8		-29.5398	14.1576	-57.2886 , -1.791	0.03693	--	0
cg15521790	11	MAML2	-71.2054	12.0169	-94.7585 , -47.6524	3.114e-09	------+------+--	21.7		-4.4239	2.76423	-9.8418 , 0.994	0.1095	----	51.2		-7.14058	11.8055	-30.2794 , 15.9983	0.5453	--	0
cg15700009	11	LDHA	75.1809	12.8995	49.8979 , 100.4639	5.602e-09	+++-++++++++++++	27.2		6.3145	6.17516	-5.7888 , 18.4178	0.3065	+?+-	25.6		4.77034	13.2595	-21.2183 , 30.759	0.719	++	0
cg15741354	8	SGK223	-32.2316	7.38739	-46.7109 , -17.7523	1.283e-05	-------+----++--	41.5		-2.83793	2.74797	-8.224 , 2.5481	0.3017	-++-	50.2		-8.71145	8.64158	-25.6489 , 8.226	0.3134	--	16.4
cg15772924	12	HOXC4	-53.2458	10.8877	-74.5857 , -31.906	1.006e-06	+-+----------+--	0		-2.46421	2.81432	-7.9803 , 3.0519	0.3812	++--	29.9		-3.78801	6.45056	-16.4311 , 8.8551	0.557	--	0
cg15806306	11	KCNQ1DN	-98.358	14.6124	-126.9984 , -69.7177	1.684e-11	------+------+--	33.4		-4.23994	3.59249	-11.2812 , 2.8013	0.2379	-++-	58.3		-9.11557	6.8612	-22.5635 , 4.3324	0.184	--	0
cg15895197	2	EMILIN1	79.1347	14.014	51.6672 , 106.6021	1.634e-08	+++++++-++++++++	4.9		2.41174	3.50185	-4.4519 , 9.2754	0.491	+++-	51.5		1.59954	9.5727	-17.1629 , 20.362	0.8673	+-	51.1
cg15908975	7	GRM8	-37.8574	7.50287	-52.563 , -23.1518	4.518e-07	---++-+--------+	52.5		-3.43041	2.66598	-8.6557 , 1.7949	0.1982	-+--	0		-4.95674	7.99224	-20.6215 , 10.708	0.5351	-+	46.4
cg15930777	6	EDN1	-71.186	13.9817	-98.5902 , -43.7818	3.555e-07	---------+---+--	18.2		-14.2629	3.48147	-21.0866 , -7.4392	4.189e-05	----	65.3		13.3676	15.1123	-16.2526 , 42.9878	0.3764	++	0
cg15959363	4	C4orf32	-51.3499	9.27072	-69.5205 , -33.1793	3.043e-08	--?+---------+--	37.5		-5.89411	2.8234	-11.428 , -0.3603	0.03683	----	14		-6.41608	6.2583	-18.6823 , 5.8502	0.3053	-+	76.4
cg15962969	6	NHSL1	93.7093	12.9171	68.3918 , 119.0268	4.026e-13	+++++++-++++++++	0		3.45984	3.8592	-4.1042 , 11.0239	0.37	++--	0		10.9189	11.3529	-11.3328 , 33.1705	0.3362	++	0
cg15995125	1	RCC2	84.1865	13.963	56.819 , 111.554	1.647e-09	+++++++-+++++-++	0		0.870964	5.19779	-9.3167 , 11.0586	0.8669	+-++	0		10.7516	13.7658	-16.2293 , 37.7326	0.4348	++	0
cg16000331	22	SREBF2	-90.53	17.4329	-124.6985 , -56.3615	2.069e-07	------+-----++--	24.8		-14.2428	7.46094	-28.8663 , 0.3806	0.05626	-+--	22.5		-38.0374	10.2467	-58.121 , -17.9538	0.0002055	--	26.4
cg16001165	4	JADE1	-52.7513	12.5973	-77.442 , -28.0606	2.82e-05	------+--+-----+	5.2		-6.01215	3.16887	-12.2231 , 0.1988	0.05779	--+-	63.5		-12.3252	11.8943	-35.638 , 10.9876	0.3001	--	0
cg16014412	1	TMEM201	128.111	20.5578	87.8179 , 168.4045	4.613e-10	-++-++++++++-+++	35.1		3.13888	3.26538	-3.2613 , 9.539	0.3364	++++	0		3.44544	14.3582	-24.6967 , 31.5876	0.8104	++	0
cg16069079	15	DLL4	74.4465	14.1072	46.7963 , 102.0966	1.312e-07	-++++++?++++++++	11.5		0.874606	3.8536	-6.6785 , 8.4277	0.8205	+++-	67.4		6.41716	7.62615	-8.5301 , 21.3644	0.4001	++	0
cg16097041	1	FLAD1	49.5829	10.5261	28.9518 , 70.214	2.471e-06	++++++++++++++++	43.1		5.08589	3.57461	-1.9203 , 12.0921	0.1548	+--+	66.5		3.33555	10.5818	-17.4048 , 24.0759	0.7526	+-	0
cg16101213	7	MIR129-1	-64.6067	15.6074	-95.1972 , -34.0161	3.481e-05	------+---+--+--	18.1		-6.59544	3.64038	-13.7306 , 0.5397	0.07003	----	10.7		-47.6037	14.9901	-76.9843 , -18.2232	0.001495	--	0
cg16165575	1	RPE65	-53.1769	9.22522	-71.2584 , -35.0955	8.2e-09	-------?-----+--	0		-4.1105	1.9988	-8.0282 , -0.1928	0.03974	----	10		-7.67728	4.73372	-16.9554 , 1.6008	0.1048	-+	71
cg16190225	7	C7orf50	53.7123	12.5093	29.194 , 78.2306	1.757e-05	+++-++++++-++++-	3.3		4.09993	3.25946	-2.2886 , 10.4885	0.2084	-+++	0		16.3838	8.1737	0.3634 , 32.4043	0.04502	++	0
cg16234490	4	FAM47E	-66.9797	11.8641	-90.2333 , -43.7261	1.646e-08	------+-----+---	0		-4.32207	4.13554	-12.4277 , 3.7836	0.296	+-+-	65.8		-14.8566	10.7969	-36.0186 , 6.3054	0.1688	--	0
cg16323245	3	ZBTB20	-34.8564	8.75732	-52.0207 , -17.692	6.884e-05	----+-++-++--+-?	60.4		-3.84581	2.11992	-8.0009 , 0.3092	0.06966	--+-	0		-2.92375	7.2873	-17.2069 , 11.3594	0.6883	--	0
cg16396933	10	NT5C2	-50.3812	8.6867	-67.4072 , -33.3553	6.639e-09	-------------+--	0		-6.11081	2.81494	-11.6281 , -0.5935	0.02994	--+-	67.5		-3.25424	8.31364	-19.549 , 13.0405	0.6955	--	0
cg16398956	14	EML1	-94.5654	18.5537	-130.9306 , -58.2002	3.454e-07	+-+------+------	6.4		-4.75525	4.22505	-13.0364 , 3.5259	0.2604	-+--	59.7		-6.74889	8.43761	-23.2866 , 9.7888	0.4238	--	0
cg16476991	13	RASA3	86.4481	15.7947	55.4904 , 117.4058	4.419e-08	+++++++-++++++++	42.2		1.99917	5.23697	-8.2653 , 12.2636	0.7027	+--+	43.2		0.543738	8.64341	-16.3973 , 17.4848	0.9498	-+	0
cg16520815	16	MGRN1	54.73	11.9039	31.3984 , 78.0615	4.273e-06	++++++++++-+-++-	7.6		2.52988	3.84126	-4.999 , 10.0587	0.5101	+--+	22.2		-8.18219	6.38085	-20.6886 , 4.3243	0.1997	+-	71.5
cg16597079	6	TRERF1	-63.1843	16.7391	-95.9929 , -30.3756	0.0001602	------+?--+--+--	40.5		-9.6037	3.78782	-17.0278 , -2.1796	0.01123	--+-	5.8		-18.2059	10.1677	-38.1347 , 1.7229	0.07337	--	0
cg16723994	17	BZRAP1	72.3545	13.2404	46.4032 , 98.3058	4.638e-08	++++++-++++++-+-	61.1		-1.33778	4.93278	-11.006 , 8.3305	0.7862	-+--	0		-3.95064	17.1486	-37.5619 , 29.6606	0.8178	+-	0
cg16744911	10	SCD	-67.3044	12.855	-92.5001 , -42.1086	1.644e-07	--+-------+-----	41.2		-6.54699	3.8049	-14.0046 , 0.9106	0.08531	--+-	73.6		-29.1804	10.4031	-49.5705 , -8.7903	0.005032	--	55.5
cg16875057	2	STK39	-66.5789	11.4562	-89.033 , -44.1248	6.187e-09	----------+-----	30.5		-5.47938	3.07768	-11.5116 , 0.5529	0.07502	--+-	71.8		-19.4334	11.1125	-41.2138 , 2.3471	0.08033	--	50.6
cg16925459	7	HDAC9	-37.3807	8.84267	-54.7123 , -20.0491	2.365e-05	---+---+-++-----	0		-6.46721	2.47987	-11.3278 , -1.6067	0.00911	----	61.3		-6.4482	5.79343	-17.8033 , 4.9069	0.2657	--	0
cg17036469	1	AMPD2	54.4356	9.99243	34.8504 , 74.0208	5.103e-08	+++-++++++++-++-	0		3.37966	3.07177	-2.641 , 9.4003	0.2712	++++	0		11.1778	7.61915	-3.7558 , 26.1113	0.1424	++	0
cg17038235	5	ERGIC1	56.0348	9.93559	36.5611 , 75.5086	1.702e-08	++-++++++++++-++	19.8		3.12678	3.17848	-3.103 , 9.3566	0.3252	+++-	14.6		8.96539	8.08666	-6.8845 , 24.8152	0.2676	++	0
cg17061862	11	WEE1	-43.3153	7.93754	-58.8729 , -27.7578	4.842e-08	------+--+--++--	30.6		2.38486	2.46041	-2.4375 , 7.2073	0.3324	-++-	13.5		3.74336	5.9536	-7.9257 , 15.4124	0.5295	+-	67
cg17142950	1	SAMD13	-55.442	10.3916	-75.8096 , -35.0744	9.541e-08	------------+---	20.1		-9.37304	2.63538	-14.5384 , -4.2077	0.0003757	--+-	56.2		-3.0906	13.4692	-29.4903 , 23.3091	0.8185	+-	0
cg17163527	1	MEGF6	-51.9879	11.2531	-74.044 , -29.9319	3.84e-06	------+?--------	55.7		-3.89336	2.29755	-8.3966 , 0.6098	0.09016	----	7.7		-7.35186	11.2869	-29.4742 , 14.7705	0.5148	+-	73
cg17237086	22	MKL1	63.8892	15.1568	34.1819 , 93.5964	2.495e-05	++++++-?+++++++-	10.2		5.76488	3.36996	-0.8402 , 12.37	0.08714	++-+	49.6		11.6206	9.39597	-6.7955 , 30.0367	0.2162	++	0
cg17276535	4	RGS12	38.0387	8.96604	20.4653 , 55.6122	2.21e-05	++-+++--++++++++	26.4		6.18664	2.85267	0.5954 , 11.7779	0.0301	++++	0		4.87773	6.49944	-7.8612 , 17.6166	0.453	-+	25.5
cg17292662	8	ATP6V1H	-70.816	13.3618	-97.0051 , -44.6268	1.159e-07	-------?-++-+---	58.1		-3.66425	2.80189	-9.1559 , 1.8275	0.1909	----	0		-19.1462	11.2758	-41.2467 , 2.9544	0.08951	+-	42.4
cg17327171	2	RBMS1	-65.0823	14.6108	-93.7195 , -36.4451	8.413e-06	-------------+--	42.5		-6.16924	4.32822	-14.6526 , 2.3141	0.1541	--+-	51.9		-10.157	10.3024	-30.3497 , 10.0357	0.3242	--	0
cg17344906	19	NFIX	68.9024	11.8872	45.6035 , 92.2012	6.777e-09	+++++--?++++++++	51.1		6.37957	2.38468	1.7056 , 11.0535	0.007468	++++	0		3.09545	4.99569	-6.6961 , 12.887	0.5355	++	0
cg17353337	6	NHSL1	79.021	12.2188	55.0721 , 102.9699	9.987e-11	+++++++-++++++++	20.8		5.55431	3.81474	-1.9226 , 13.0312	0.1454	++-+	0		3.82715	9.66254	-15.1114 , 22.7657	0.692	++	0
cg17442852	17	SLC43A2	55.9312	9.55166	37.2099 , 74.6524	4.751e-09	++++++--++-++++-	47.9		5.29363	2.92249	-0.4345 , 11.0217	0.07009	++-+	33.7		4.92674	5.9779	-6.7899 , 16.6434	0.4098	++	0
cg17470397	3	OPA1	-72.9913	13.6599	-99.7646 , -46.218	9.117e-08	------++--+--+-+	21.9		-13.2349	5.78758	-24.5786 , -1.8913	0.02221	--+-	52.4		-18.1075	15.5082	-48.5036 , 12.2886	0.243	+-	44.5
cg17711527	1	LAX1	-69.5604	11.1401	-91.3949 , -47.7259	4.261e-10	------+------+--	31.7		1.86494	2.79707	-3.6173 , 7.3472	0.5049	-+--	83.8		-10.7155	8.37223	-27.125 , 5.6941	0.2006	--	0
cg17714703	19	UHRF1	135.343	12.5532	110.7383 , 159.9468	4.209e-27	++++++-+++++-+++	56.7		3.01926	3.3258	-3.4993 , 9.5378	0.364	+--+	0		8.51863	7.34461	-5.8768 , 22.9141	0.2461	-+	0
cg17725019	22	PIK3IP1	60.8204	12.8883	35.5593 , 86.0815	2.37e-06	++++++++++-+++++	0.1		5.91725	3.94246	-1.81 , 13.6445	0.1334	++-+	0		7.05183	13.7688	-19.9351 , 34.0388	0.6085	-+	0
cg17730048	17	PPY2P	75.8296	12.3939	51.5376 , 100.1215	9.457e-10	+++-++-?++++++++	40.8		1.68376	3.11534	-4.4223 , 7.7898	0.5889	+++-	0		-3.24166	10.1362	-23.1086 , 16.6253	0.7491	--	0
cg17758673	4	RGS12	56.3966	9.66595	37.4513 , 75.3418	5.393e-09	+-+-++++++-++---	49.8		1.26079	2.39709	-3.4375 , 5.9591	0.5989	++--	52.3		9.88715	6.332	-2.5236 , 22.2979	0.1184	++	0
cg17782974	10	TRIM8	63.5408	10.0146	43.9122 , 83.1694	2.227e-10	++++++++++++++++	0		5.99184	2.79693	0.5099 , 11.4738	0.03217	+-++	63.7		7.21802	8.3479	-9.1439 , 23.5799	0.3872	-+	0
cg17783244	22	PATZ1	50.4735	9.60377	31.6502 , 69.2969	1.475e-07	+++++++?++-+++++	33.4		2.80393	2.30818	-1.7201 , 7.328	0.2244	-+-+	0		0.773313	7.40257	-13.7357 , 15.2823	0.9168	+-	0
cg17819250	8	KCNU1	-50.8654	10.2757	-71.0057 , -30.7251	7.418e-07	-+----+-----++--	49.2		-4.92596	5.28573	-15.286 , 5.4341	0.3514	-?--	0		-15.6704	6.25295	-27.9262 , -3.4147	0.01221	--	0
cg17828445	12	2018-03-09	106.127	21.1827	64.6091 , 147.6453	5.441e-07	+++++++++++?-+++	5.8		11.6054	5.4908	0.8435 , 22.3674	0.03455	++-+	0		18.0271	8.87741	0.6273 , 35.4268	0.04229	++	75.6
cg17850088	1	VPS45	79.7012	9.66077	60.7661 , 98.6363	1.584e-16	+++++++?+++++?+?	0		1.29127	2.09105	-2.8072 , 5.3897	0.5369	+++-	54.7		12.1412	5.60572	1.154 , 23.1284	0.03032	++	61.5
cg17870997	2	GLI2	-37.3438	6.20886	-49.5132 , -25.1744	1.803e-09	------------++--	17.6		-1.27656	1.76449	-4.735 , 2.1818	0.4694	-+-+	53		3.54406	5.24219	-6.7306 , 13.8188	0.499	-+	0
cg17901584	1	DHCR24	-43.1337	10.1819	-63.0901 , -23.1772	2.272e-05	--+-------+--+--	34.7		-2.45571	2.75208	-7.8498 , 2.9384	0.3722	--++	31.9		-7.80082	5.18161	-17.9568 , 2.3551	0.1322	--	0
cg17924072	19	HMHA1	-63.589	9.84737	-82.8898 , -44.2881	1.065e-10	----------+---+-	53.4		-9.22829	4.09928	-17.2629 , -1.1937	0.02437	-?--	0		5.02126	4.10871	-3.0318 , 13.0743	0.2217	++	0
cg18033092	11	C11orf49	-59.7257	12.4218	-84.0724 , -35.379	1.523e-06	---------++-----	28.1		-5.00606	3.23739	-11.3514 , 1.3392	0.122	----	0		-16.8854	14.2368	-44.7894 , 11.0187	0.2356	+-	66.9
cg18050903	4	RASGEF1B	-115.462	21.2235	-157.0598 , -73.8635	5.32e-08	---------+------	36.3		-5.86621	10.5712	-26.5857 , 14.8533	0.5789	-?+-	67		-20.1668	32.7559	-84.3684 , 44.0349	0.5381	--	0
cg18062064	20	TLDC2	-90.8956	19.3915	-128.9029 , -52.8882	2.767e-06	--+---+------+--	0		-7.31766	5.01781	-17.1526 , 2.5173	0.1447	-++-	59.6		-10.5717	11.9845	-34.0613 , 12.9179	0.3777	--	0
cg18219522	11	MAML2	-55.1645	11.6897	-78.0764 , -32.2527	2.369e-06	-------?-+------	0		-3.43348	2.79853	-8.9186 , 2.0516	0.2199	+-+-	62.1		-19.0862	9.28737	-37.2895 , -0.883	0.03987	--	0
cg18299068	4	MAEA	88.9145	13.1918	63.0587 , 114.7704	1.582e-11	++++++++++-++++-	45.8		2.1406	4.08288	-5.8618 , 10.1431	0.6001	++-+	0		11.4896	14.9638	-17.8393 , 40.8186	0.4426	-+	0
cg18334681	6	ENPP3	-73.5815	12.8346	-98.7372 , -48.4257	9.863e-09	--+----------+--	54.3		-7.30996	4.32904	-15.7949 , 1.175	0.0913	----	0		0.090944	6.17014	-12.0025 , 12.1844	0.9882	-+	0
cg18402166	17	PLEKHM1P	71.1109	14.4446	42.7995 , 99.4223	8.522e-07	+++++++?+++++---	42.3		3.64393	3.45144	-3.1209 , 10.4087	0.2911	++++	0		6.19787	10.4454	-14.2752 , 26.6709	0.5529	++	0
cg18489994	4	C1QTNF7	-90.1248	14.1126	-117.7854 , -62.4642	1.701e-10	-------------+--	0		-6.62508	3.61464	-13.7098 , 0.4596	0.06683	-++-	69		-5.00066	8.08239	-20.8421 , 10.8408	0.5361	--	0
cg18503793	22	TEF	-178.294	33.6636	-244.2746 , -112.3132	1.181e-07	--+-------+--+--	2.1		-18.9133	11.7247	-41.8938 , 4.0672	0.1067	----	0		1.60727	12.2495	-22.4017 , 25.6162	0.8956	+-	0
cg18515868	4	MAEA	75.4554	17.1361	41.8686 , 109.0423	1.066e-05	+-+-++-+++-++-+-	56.1		5.41284	4.06526	-2.5551 , 13.3808	0.183	-+++	0		1.4321	40.9081	-78.7478 , 81.612	0.9721	-+	0
cg18536994	17	TMEM235	81.5006	12.518	56.9653 , 106.0358	7.482e-11	++++++-+++++--+-	51.5		9.04678	3.80087	1.5971 , 16.4965	0.0173	++++	41.6		-22.7646	11.3015	-44.9156 , -0.6136	0.04398	--	0
cg18584067	2	SERTAD2	-77.5799	12.5835	-102.2435 , -52.9162	7.039e-10	------+?-----+--	24		-9.46971	3.6826	-16.6876 , -2.2518	0.01013	----	35.3		-8.69218	6.02765	-20.5064 , 3.122	0.1493	-+	79
cg18598117	19	ARID3A	-35.4866	9.40335	-53.9171 , -17.056	0.0001608	----+-+?-++-----	53.3		-7.85027	2.57518	-12.8976 , -2.8029	0.0023	----	28.4		-16.1116	13.5968	-42.7613 , 10.5381	0.236	+-	17.6
cg18642369	13	DOCK9	-42.2991	11.2079	-64.2667 , -20.3316	0.0001606	------------+?-?	6.4		-9.03023	2.61874	-14.163 , -3.8975	0.0005641	+---	53.1		-10.909	5.81319	-22.3028 , 0.4849	0.06057	--	0
cg18702935	13	SUCLA2	-108.75	14.6654	-137.4939 , -80.0054	1.213e-13	------+-----++--	55.1		-6.35485	3.1034	-12.4375 , -0.2722	0.04059	----	0		-16.6086	16.2129	-48.3859 , 15.1687	0.3056	--	0
cg18716210	11	MRPL23-AS1	49.3343	9.9198	29.8915 , 68.7771	6.582e-07	+++++++++++++-+-	61.3		6.29186	3.92321	-1.3976 , 13.9813	0.1088	++-+	37.7		-4.61957	11.6065	-27.3683 , 18.1291	0.6906	--	0
cg18804667	5	PDE4D	61.5209	7.00997	47.7813 , 75.2604	1.691e-18	++++++++++++-+-+	31.3		4.36003	1.94093	0.5558 , 8.1642	0.02468	+++-	32.8		7.19336	5.03734	-2.6798 , 17.0665	0.1533	++	0
cg18835596	6	MYB	-78.1531	14.4993	-106.5717 , -49.7345	7.041e-08	---+--+?-+---+--	27.8		-5.40573	3.0077	-11.3008 , 0.4894	0.07229	----	0		-8.26432	8.57584	-25.073 , 8.5443	0.3352	+-	0
cg18857467	1	HDAC1	-41.1192	10.9186	-62.5197 , -19.7187	0.0001659	+-----+-+---+---	49.5		-4.25927	2.88668	-9.9172 , 1.3986	0.1401	----	42.9		-7.35616	7.96639	-22.9703 , 8.258	0.3558	--	0
cg18944752	4	RGS12	-47.5287	9.38753	-65.9283 , -29.1292	4.128e-07	-------------++-	20		-7.12028	2.2917	-11.612 , -2.6285	0.00189	----	38.9		8.45181	8.3978	-8.0079 , 24.9115	0.3142	++	0
cg19029445	17	ABR	42.1412	8.9422	24.6145 , 59.6679	2.445e-06	+++++-+++-+++++-	5.4		8.00429	2.8638	2.3912 , 13.6173	0.00519	++++	31.7		-1.6499	8.51971	-18.3485 , 15.0487	0.8464	--	0
cg19211915	11	WT1	-94.7192	14.9001	-123.9234 , -65.515	2.058e-10	--+------------+	0		0.755838	4.03156	-7.146 , 8.6577	0.8513	-+-+	0		-4.22158	6.69667	-17.3471 , 8.9039	0.5284	--	0
cg19242268	20	TCEA2	98.0897	16.0442	66.6429 , 129.5364	9.735e-10	++++++-++++++---	41.6		5.05239	4.05048	-2.8866 , 12.9913	0.2123	++++	0		9.06407	9.2507	-9.0673 , 27.1954	0.3272	++	0
cg19260606	1	KAZN	-60.8105	8.59805	-77.6627 , -43.9584	1.521e-12	-+-----------+-+	54.5		-3.06052	2.883	-8.7112 , 2.5901	0.2884	+---	11.7		-14.4195	6.44632	-27.0543 , -1.7848	0.0253	--	0
cg19265972	17	ASGR1	95.7494	21.1326	54.3294 , 137.1694	5.874e-06	+++++++?+++--+++	56.1		7.36363	4.99152	-2.4198 , 17.147	0.1402	++-+	13.6		11.3806	11.4498	-11.061 , 33.8221	0.3202	++	0
cg19295068	19	GLTSCR1	52.3656	8.97187	34.7807 , 69.9505	5.326e-09	++++++-++++++-++	49.1		-1.66797	2.22383	-6.0267 , 2.6907	0.4532	+---	0		-6.6731	9.71404	-25.7126 , 12.3664	0.4921	+-	0
cg19323059	7	INHBA-AS1	-63.5937	11.7372	-86.5986 , -40.5888	6.023e-08	---+--+---+-----	25.6		0.654902	3.11527	-5.451 , 6.7608	0.8335	+-++	0		-1.72624	12.1408	-25.5221 , 22.0697	0.8869	+-	0
cg19358373	12	CHFR	76.4617	13.4346	50.1299 , 102.7934	1.26e-08	+++-+++-++++-+++	22		8.89073	3.88797	1.2703 , 16.5112	0.02221	++-+	0		-5.12017	9.12534	-23.0058 , 12.7655	0.5747	+-	0
cg19370689	7	FBXL13	-65.3287	14.2899	-93.337 , -37.3204	4.839e-06	-+----+---------	21.7		-7.15319	4.38645	-15.7506 , 1.4442	0.1029	----	0		11.1738	15.0369	-18.2985 , 40.646	0.4574	++	0
cg19374752	12	GRASP	67.1028	11.5002	44.5623 , 89.6433	5.382e-09	+++-+++-+++++-+-	20.7		1.29945	2.95398	-4.4904 , 7.0893	0.66	+-++	0		-4.19066	8.61617	-21.0784 , 12.697	0.6267	--	0
cg19379721	19	LPAR2	105.808	13.0464	80.2375 , 131.3795	5.056e-16	++++++-++++++-++	42		3.66152	3.65061	-3.4937 , 10.8167	0.3159	++++	0		3.60533	9.2697	-14.5633 , 21.774	0.6973	++	0
cg19448816	3	PLCL2	-76.4767	12.2937	-100.5724 , -52.381	4.947e-10	------+?--+--+--	4.3		-3.6103	2.17908	-7.8813 , 0.6607	0.09756	--+-	63.1		-1.48409	10.7885	-22.6295 , 19.6613	0.8906	--	0
cg19449917	3	LINC00880	-96.537	15.8083	-127.5214 , -65.5527	1.017e-09	--+----?-+---+-+	46.5		-0.028446	3.38885	-6.6706 , 6.6137	0.9933	-+--	0		-6.87924	8.25251	-23.0542 , 9.2957	0.4045	+-	82.5
cg19459094	5	GRK6	69.5613	15.1695	39.8291 , 99.2935	4.527e-06	++++++++++++++-+	34		-2.07662	4.69315	-11.2752 , 7.122	0.6581	+---	17.9		15.7973	9.72713	-3.2679 , 34.8625	0.1044	++	0
cg19520763	3	ACVR2B	-53.9843	11.9404	-77.3875 , -30.5812	6.15e-06	+-----+---------	50.6		-3.17584	3.235	-9.5164 , 3.1648	0.3262	+---	32.4		-10.7738	12.4037	-35.085 , 13.5375	0.3851	-+	70.5
cg19523667	7	ZMIZ2	72.3792	13.722	45.484 , 99.2743	1.33e-07	+++-+++++++++-+-	40.9		3.14058	3.55874	-3.8346 , 10.1157	0.3775	-++-	0		-15.8056	10.9831	-37.3324 , 5.7212	0.1501	--	0
cg19827875	1	NAV1	32.0178	6.4276	19.4197 , 44.6159	6.316e-07	+++-++++++++--++	0		2.8189	1.91001	-0.9247 , 6.5625	0.14	+++-	45.3		0.418771	9.04369	-17.3069 , 18.1444	0.9631	-+	0
cg19843457	12	SFSWAP	-61.7478	9.53846	-80.4432 , -43.0524	9.572e-11	-------------+--	31.4		-5.27984	2.1496	-9.4931 , -1.0666	0.01404	----	44.1		0.241864	7.57582	-14.6067 , 15.0905	0.9745	-+	0
cg19851563	19	GNG7	26.6742	6.318	14.2909 , 39.0574	2.422e-05	+-+++-+++++++++-	14.4		3.75839	1.76563	0.2978 , 7.219	0.03328	+-++	31.9		3.17744	7.48257	-11.4884 , 17.8433	0.6711	-+	24.3
cg19863740	22	PARVG	-77.2536	17.5611	-111.6733 , -42.8339	1.087e-05	-------------+--	0		-5.5305	3.6769	-12.7372 , 1.6762	0.1326	+---	55.6		-7.37102	4.24839	-15.6979 , 0.9558	0.08274	--	0
cg19869443	1	SAMD13	-48.9915	11.4491	-71.4317 , -26.5514	1.877e-05	------+------+--	0		-5.12883	2.93754	-10.8864 , 0.6287	0.08082	--+-	63.9		-7.68649	12.8828	-32.9368 , 17.5638	0.5507	--	0
cg19876649	18	MYOM1	-53.4526	11.1616	-75.3293 , -31.5758	1.676e-06	------+-------+-	48.9		-7.67188	4.1163	-15.7398 , 0.3961	0.06235	----	0		-13.5264	11.1633	-35.4064 , 8.3536	0.2256	+-	69.5
cg19889855	3	PARP15	-50.8281	10.3184	-71.0521 , -30.6041	8.394e-07	------+------+--	38.3		-6.33268	3.07127	-12.3524 , -0.313	0.03922	----	30.1		-4.07584	12.1163	-27.8237 , 19.672	0.7366	+-	44.1
cg19914554	17	CD7	75.858	17.7227	41.1215 , 110.5945	1.867e-05	-+++++--++-+--++	39		10.5038	3.85357	2.9508 , 18.0568	0.006416	-+++	0		-4.27808	8.73631	-21.4012 , 12.8451	0.6244	+-	79.5
cg19935065	10	DNTT	-69.6963	14.0632	-97.2602 , -42.1323	7.199e-07	-------?--+-----	45.8		-4.36035	2.63559	-9.5261 , 0.8054	0.09804	----	39.3		-11.9837	15.4558	-42.2771 , 18.3097	0.4381	--	0
cg20012601	4	MAML3	59.8058	13.3739	33.5929 , 86.0187	7.756e-06	+++-+++?++++---+	36.9		4.64099	3.50535	-2.2295 , 11.5115	0.1855	+++-	7.8		41.7166	17.8983	6.6359 , 76.7973	0.01977	++	0
cg20014974	1	SLC45A1	85.6623	17.0676	52.2098 , 119.1147	5.194e-07	+++-+++++++++-++	46.1		4.65313	3.65369	-2.5081 , 11.8144	0.2028	+-++	12.7		9.17326	6.48421	-3.5358 , 21.8823	0.1572	++	0
cg20102045	13	MYO16	53.1944	8.69881	36.1447 , 70.244	9.648e-10	++++++-+++++++++	59.6		3.64904	2.76354	-1.7675 , 9.0656	0.1867	++-+	0		4.37415	6.04045	-7.4651 , 16.2134	0.469	++	0
cg20141108	1	UCK2	-59.4774	11.7273	-82.4629 , -36.4918	3.943e-07	-------?-+------	7.5		-2.16827	2.56128	-7.1884 , 2.8518	0.3972	+--+	46		-5.84893	13.7753	-32.8485 , 21.1507	0.6711	+-	0
cg20176142	8	ZBTB10	-44.6925	10.2743	-64.8302 , -24.5549	1.362e-05	-----+++-++---+-	59.1		-3.69147	3.17718	-9.9187 , 2.5358	0.2453	--+-	0		-2.1954	7.69533	-17.2782 , 12.8875	0.7754	+-	0
cg20186396	17	CD7	74.7364	17.3191	40.791 , 108.6817	1.594e-05	++++++--++-+--++	24.8		11.1207	3.78556	3.701 , 18.5404	0.003307	++++	0		-2.6724	8.28232	-18.9058 , 13.561	0.747	+-	0
cg20204986	11	WT1	-52.2002	8.82844	-69.5039 , -34.8964	3.365e-09	---+--+-----+---	51.3		-1.30612	2.83528	-6.8633 , 4.251	0.645	-++-	43.2		-11.3828	8.71562	-28.4654 , 5.6998	0.1915	--	0
cg20219891	2	GLI2	-25.0937	3.52384	-32.0004 , -18.1869	1.071e-12	------------++--	0.7		-0.662098	1.12812	-2.8732 , 1.549	0.5573	-+-+	52		2.94792	2.91367	-2.7629 , 8.6587	0.3117	-+	46.5
cg20236995	1	PRDM16	112.964	19.3451	75.0476 , 150.8802	5.238e-09	+++-+++++++++-++	46.6		5.32599	4.33309	-3.1669 , 13.8188	0.219	++-+	0		-3.58403	10.4954	-24.1551 , 16.987	0.7327	-+	44.8
cg20283107	8	FAM91A1	-60.1505	10.2278	-80.1969 , -40.1041	4.075e-09	----------+--+--	25		-4.1445	2.84535	-9.7214 , 1.4324	0.1452	----	0		1.75083	9.93629	-17.7243 , 21.2259	0.8601	-+	0
cg20309640	1	LOC730102	66.8599	11.3897	44.536 , 89.1838	4.353e-09	+++-++++++++--++	40.5		3.94081	3.65913	-3.2311 , 11.1127	0.2815	+-++	46.3		17.1089	8.59108	0.2704 , 33.9474	0.04643	++	0
cg20357806	4	PPBP	-76.9524	13.9568	-104.3077 , -49.5972	3.515e-08	---------+---+--	0		-5.16877	3.42318	-11.8782 , 1.5407	0.1311	--+-	67.3		-26.0712	14.568	-54.6245 , 2.482	0.07351	--	0
cg20359445	12	IKZF4	91.0012	15.257	61.0974 , 120.905	2.453e-09	+++++++-++++--++	31.6		-0.248568	3.64282	-7.3885 , 6.8914	0.9456	+++-	81.8		10.4494	11.8549	-12.7862 , 33.685	0.3781	++	0
cg20364632	6	CRISP2	-41.7968	10.1744	-61.7385 , -21.855	3.99e-05	------+--++-++-+	49.8		-5.38324	2.54644	-10.3743 , -0.3922	0.03451	----	14.6		0.793491	6.20713	-11.3725 , 12.9595	0.8983	-+	0
cg20370909	7	RADIL	49.364	10.4163	28.9479 , 69.78	2.147e-06	++++++-+++++--+-	3.1		8.77888	3.25111	2.4067 , 15.151	0.006928	++++	0.1		-3.4136	7.93039	-18.9572 , 12.13	0.6669	--	0
cg20386404	1	PTPN14	-53.0898	12.531	-77.6506 , -28.5291	2.268e-05	-+++---+-----+--	0		-5.56527	2.96775	-11.3821 , 0.2515	0.06076	--+-	10.1		7.51009	8.75258	-9.645 , 24.6651	0.3909	++	0
cg20449670	1	S100A6	-74.3484	10.9008	-95.7139 , -52.9829	9.073e-12	-------?-++--+--	61.1		-0.645646	2.50292	-5.5514 , 4.2601	0.7964	+---	0		-10.4288	12.1138	-34.1719 , 13.3143	0.3893	+-	0
cg20494635	11	MRPL23-AS1	92.1383	15.1897	62.3666 , 121.9101	1.312e-09	+-+++++-+++++++-	10.2		-5.5304	4.2807	-13.9206 , 2.8598	0.1964	+-+-	40.9		-1.88534	7.66591	-16.9105 , 13.1398	0.8057	+-	17.8
cg20519581	20	LINC01270	-70.6428	14.2509	-98.5745 , -42.7111	7.156e-07	------------+---	0		-5.54531	3.74911	-12.8936 , 1.8029	0.1391	--+-	60.6		-2.66652	11.3231	-24.8597 , 19.5267	0.8138	--	0
cg20635389	2	CPO	69.9591	15.8047	38.9818 , 100.9363	9.579e-06	-++-+++?++++-+++	0		9.31809	7.67235	-5.7197 , 24.3559	0.2246	+?-+	48.1		7.98743	7.7594	-7.221 , 23.1959	0.3033	+-	31.1
cg20652404	15	LOXL1-AS1	104.401	13.5701	77.8034 , 130.9984	1.432e-14	++++++++++++++++	29.4		2.83918	3.13901	-3.3133 , 8.9916	0.3657	+++-	0		12.0702	8.63043	-4.8455 , 28.9858	0.1619	++	1.1
cg20658466	7	IGFBP3	-82.3274	12.8823	-107.5768 , -57.078	1.651e-10	------+?--------	0		-4.63634	3.16889	-10.8474 , 1.5747	0.1434	----	18.4		4.68769	7.30592	-9.6319 , 19.0073	0.5211	++	0
cg20663495	17	B3GNTL1	74.8846	14.4164	46.6285 , 103.1408	2.054e-07	++++++--++++-++-	42.2		-9.17079	6.72429	-22.3504 , 4.0088	0.1726	-?--	0		27.9679	10.1328	8.1077 , 47.8281	0.005778	++	57.8
cg20664313	12	FBRSL1	73.6335	12.5955	48.9464 , 98.3206	5.035e-09	+++++++++++++--+	38.8		5.49926	3.64692	-1.6487 , 12.6472	0.1316	++-+	0		8.51577	14.279	-19.471 , 36.5026	0.5509	++	0
cg20717932	17	THRA	-71.5028	12.2544	-95.5213 , -47.4842	5.383e-09	-------?-----+--	55.5		-5.86245	2.66343	-11.0828 , -0.6421	0.02773	--+-	20.2		-10.6247	5.90851	-22.2054 , 0.956	0.07214	--	0
cg20730966	3	GLB1	-63.566	12.6703	-88.3998 , -38.7322	5.251e-07	----+--------+--	5.8		-16.2755	6.00849	-28.0522 , -4.4989	0.006754	-?--	0		-12.9543	6.05093	-24.8141 , -1.0945	0.03228	--	0
cg20752878	17	ASGR1	94.2318	11.4507	71.7884 , 116.6752	1.883e-16	+++++++?++++-+++	29.8		5.32642	4.15396	-2.8153 , 13.4682	0.1998	+?++	0		-1.64185	7.15197	-15.6597 , 12.376	0.8184	-+	0
cg20784591	7	PILRA	155.954	26.2566	104.4912 , 207.417	2.857e-09	+++++++?+++++++-	0		5.47429	5.33021	-4.9729 , 15.9215	0.3044	++-+	0		16.2663	13.5199	-10.2327 , 42.7653	0.2289	++	0
cg20865778	11	TCIRG1	80.1568	17.5952	45.6703 , 114.6433	5.223e-06	+++++-+-+++++++-	39.1		28.3992	9.90003	8.9952 , 47.8033	0.004123	+?-+	68.5		16.2663	13.1044	-9.4183 , 41.9509	0.2145	++	0
cg20876852	7	MEST	-60.3884	11.4593	-82.8486 , -37.9283	1.365e-07	----+-++----+-+-	59.3		-3.99489	3.98876	-11.8129 , 3.8231	0.3166	--+-	0		-8.92773	14.7344	-37.8072 , 19.9517	0.5446	+-	0
cg20948740	2	DNMT3A	82.6587	15.5628	52.1556 , 113.1618	1.088e-07	++++++++++-+-++-	46.6		2.64275	4.33497	-5.8538 , 11.1393	0.5421	++-+	0		5.74014	11.7877	-17.3638 , 28.844	0.6263	-+	0
cg21058822	8	MIR548O2	-58.5684	8.25268	-74.7437 , -42.3932	1.276e-12	-------?--------	44.4		-2.4482	2.26011	-6.878 , 1.9816	0.2787	----	0		2.41401	5.79357	-8.9414 , 13.7694	0.6769	+-	28.9
cg21121843	4	HTT	-52.4101	8.96005	-69.9718 , -34.8484	4.936e-09	-------?----++--	68.4		-4.71152	2.15985	-8.9448 , -0.4782	0.02915	--+-	24.9		2.99279	7.93889	-12.5674 , 18.553	0.7062	+-	0
cg21141329	17	COL1A1	90.2096	15.373	60.0785 , 120.3406	4.409e-09	+++++++++++++-+-	43.6		5.78498	5.83672	-5.655 , 17.225	0.3216	-+--	4.8		2.61827	9.60761	-16.2126 , 21.4492	0.7852	+-	0
cg21155834	2	MBD5	-102.515	19.333	-140.4075 , -64.6221	1.142e-07	----------+--+--	55.5		-22.3644	9.00609	-40.0163 , -4.7125	0.01302	-?--	0		-16.8718	8.44071	-33.4156 , -0.3281	0.04562	--	0
cg21193744	8	MCPH1	-120.777	23.4485	-166.7356 , -74.8177	2.595e-07	----------------	14.6		-1.56222	6.91528	-15.1162 , 11.9917	0.8213	--++	33.1		-77.8972	20.5457	-118.1667 , -37.6277	0.0001498	--	0
cg21220721	1	ACOT7	-67.6708	13.6185	-94.363 , -40.9786	6.728e-07	---+--+--++-+---	59.2		-12.3129	6.94398	-25.9231 , 1.2973	0.0762	----	42		-39.5443	34.1274	-106.434 , 27.3454	0.2466	+-	0
cg21221712	15	AKAP13	-70.8216	14.3924	-99.0308 , -42.6125	8.621e-07	-------+-++-----	33.2		-8.16698	4.53195	-17.0496 , 0.7156	0.07153	--+-	9.6		-14.0242	15.9968	-45.378 , 17.3296	0.3807	--	0
cg21221767	14	MAX	-77.6549	12.7316	-102.6089 , -52.701	1.065e-09	-------+-----++-	63.9		-4.3139	3.22287	-10.6307 , 2.0029	0.1807	----	20.8		-4.40865	8.99746	-22.0437 , 13.2264	0.6241	--	0
cg21228424	6	PRPH2	46.1324	7.88551	30.6768 , 61.588	4.908e-09	+++++++?+-+++++?	0		8.54258	5.26836	-1.7834 , 18.8686	0.1049	+?-?	67		-5.66652	7.39422	-20.1592 , 8.8261	0.4435	-+	17.1
cg21249754	12	PTPN6	85.0195	15.5329	54.575 , 115.4641	4.412e-08	+++++++?+++-+++-	25.5		2.71001	3.17802	-3.5189 , 8.9389	0.3938	+-++	39		10.1871	9.44752	-8.33 , 28.7042	0.2809	++	0
cg21369801	17	CSNK1D	56.0677	11.0674	34.3757 , 77.7598	4.062e-07	++-+++++++-++-++	11.4		3.94409	3.74846	-3.4029 , 11.2911	0.2927	+--+	73.2		10.2141	9.01643	-7.4581 , 27.8863	0.2573	++	0
cg21454485	1	CD84	-47.3401	9.71286	-66.3773 , -28.3029	1.094e-06	------+?----+---	8.7		-4.75669	2.4629	-9.584 , 0.0706	0.05344	----	0		2.22854	10.829	-18.9963 , 23.4534	0.837	-+	0
cg21505925	21	DYRK1A	-47.5659	9.88122	-66.9331 , -28.1987	1.481e-06	---------------+	0		-2.87261	2.61125	-7.9907 , 2.2454	0.2713	-++-	52.9		-3.69882	4.4326	-12.3867 , 4.9891	0.404	--	0
cg21516291	20	SLC35C2	101.35	14.8646	72.2148 , 130.4843	9.222e-12	+++-+++++++++-++	41.5		3.30109	4.91546	-6.3332 , 12.9354	0.5019	+-++	37.8		-11.1704	9.15523	-29.1146 , 6.7739	0.2224	-+	74.3
cg21520055	14	NDRG2	-63.4712	12.0437	-87.0769 , -39.8656	1.364e-07	------++--+--+--	0		-7.814	4.40897	-16.4556 , 0.8276	0.07635	----	0		-4.82913	16.9552	-38.0613 , 28.4031	0.7758	+-	47.9
cg21542842	4	2018-09-11	-79.3755	18.8266	-116.2755 , -42.4755	2.485e-05	---------+---+--	49.9		-7.90292	5.33412	-18.3578 , 2.552	0.1385	-+--	42		4.6669	9.68964	-14.3248 , 23.6586	0.6301	++	0
cg21554670	17	GAS7	-51.6732	10.8474	-72.9342 , -30.4123	1.901e-06	------++-++-++--	58.2		-5.4026	3.43311	-12.1315 , 1.3263	0.1156	--+-	70.8		-4.13219	11.9192	-27.4938 , 19.2294	0.7288	--	0
cg21586223	13	CYSLTR2	-50.5762	9.29582	-68.796 , -32.3564	5.306e-08	------+?--------	51.1		-3.24396	3.03931	-9.201 , 2.7131	0.2858	+---	0		4.77644	7.77622	-10.465 , 20.0178	0.5391	+-	70.7
cg21597811	8	ZHX2	-65.3793	11.8784	-88.661 , -42.0976	3.712e-08	------+------+--	0		-3.11082	3.10961	-9.2057 , 2.984	0.3171	--+-	0		7.43192	9.80938	-11.7945 , 26.6583	0.4487	++	0
cg21601493	13	IRS2	77.7473	18.487	41.5127 , 113.9819	2.605e-05	+++++-++++-++-+-	38		17.1565	8.46046	0.574 , 33.739	0.04258	+?-+	66.7		14.7235	15.4259	-15.5113 , 44.9584	0.3398	++	42.4
cg21609804	11	MARK2	80.9889	15.7875	50.0454 , 111.9325	2.898e-07	+++-++++++++--+-	0		4.36581	5.45662	-6.3292 , 15.0608	0.4237	++++	0		1.76811	11.9884	-21.7291 , 25.2653	0.8827	+-	0
cg21646032	3	RARB	-66.6878	13.4226	-92.996 , -40.3796	6.753e-07	----------+--+--	8.4		-4.56194	3.17059	-10.7763 , 1.6524	0.1502	--+-	2.2		-23.7842	15.1403	-53.4592 , 5.8909	0.1162	--	0
cg21649604	22	RPL3	89.4385	17.2268	55.6739 , 123.2031	2.083e-07	+++-+++-++++++++	38.8		11.8906	7.38708	-2.588 , 26.3693	0.1075	+?++	0		5.39389	10.9453	-16.0589 , 26.8466	0.6222	++	0
cg21684021	1	CELSR2	-45.1419	14.5665	-73.6923 , -16.5916	0.001942	----+-----------	0		-14.299	4.32064	-22.7675 , -5.8306	0.0009347	----	0		-7.29307	8.61034	-24.1693 , 9.5832	0.397	--	0
cg21690489	11	CREB3L1	-146.836	24.16	-194.1897 , -99.4825	1.22e-09	------+?--+--+--	50.2		-3.82009	5.15567	-13.9252 , 6.285	0.4587	+---	0		-4.17978	13.9915	-31.603 , 23.2435	0.7651	-+	0
cg21703988	12	EP400	45.3704	9.97361	25.8221 , 64.9187	5.389e-06	+++++++-++-+++++	55.2		5.82199	3.2109	-0.4714 , 12.1154	0.0698	++-+	0		19.9493	15.0349	-9.5191 , 49.4177	0.1846	++	0
cg21707172	6	TIAM2	50.0097	9.53618	31.3188 , 68.7007	1.569e-07	+++++++-++++-+++	0		2.5968	2.86754	-3.0236 , 8.2172	0.3652	-+-+	0		14.5411	11.3531	-7.7109 , 36.7931	0.2003	++	0
cg21726551	12	ADGRD1	75.4051	13.2456	49.4436 , 101.3665	1.25e-08	++++++-+++++++++	0		2.60109	3.89367	-5.0305 , 10.2327	0.5041	++-+	74.1		8.78218	10.9761	-12.7309 , 30.2953	0.4236	++	0
cg21785384	1	TMCC2	63.0789	12.6921	38.2023 , 87.9554	6.698e-07	+++++++?++-++-+-	45.4		-4.96433	6.15809	-17.0342 , 7.1055	0.4202	+?--	0		4.71244	10.6583	-16.1778 , 25.6027	0.6584	++	0
cg21788755	3	ATRIP	70.3094	13.2668	44.3065 , 96.3124	1.16e-07	+++++++-+++++-+-	46.8		11.0451	8.41924	-5.4566 , 27.5468	0.1896	+?++	0		14.9262	16.963	-18.3213 , 48.1737	0.3789	++	0
cg21805179	12	MPHOSPH9	58.0449	9.47583	39.4723 , 76.6175	9.036e-10	++?+++-+++++-+++	0		2.58073	2.24723	-1.8238 , 6.9853	0.2508	++-+	0		0.132456	9.30076	-18.097 , 18.362	0.9886	+-	0
cg21805788	1	FAM102B	-55.3743	11.319	-77.5595 , -33.189	9.974e-07	------+--+---+--	33.2		-3.55046	4.01431	-11.4185 , 4.3176	0.3765	--++	0		-13.8201	9.03111	-31.5211 , 3.8808	0.1259	+-	75.9
cg21912938	7	JAZF1-AS1	-102.806	18.1442	-138.369 , -67.2436	1.461e-08	---+------------	0		-8.80576	5.88275	-20.3359 , 2.7244	0.1344	--+-	38.1		3.29612	12.2297	-20.6741 , 27.2664	0.7875	+-	5.9
cg21926626	8	TSNARE1	-47.9708	9.1456	-65.8961 , -30.0454	1.561e-07	----+-----------	13.1		-3.07794	1.86626	-6.7358 , 0.5799	0.0991	--+-	41.7		-10.2477	7.48238	-24.9132 , 4.4178	0.1708	--	68.2
cg21995347	5	SNX18	72.9668	10.2253	52.9251 , 93.0085	9.617e-13	+++++-+?+++++-++	30.6		5.31109	3.96185	-2.4542 , 13.0763	0.1801	++-+	41.5		17.6177	10.8743	-3.696 , 38.9314	0.1052	++	0
cg22030032	19	RAB4B-EGLN2	85.6009	18.4851	49.3702 , 121.8316	3.642e-06	+++-+++-++++-++-	40.3		-0.17725	6.17197	-12.2743 , 11.9198	0.9771	++-+	0		-6.90836	7.2404	-21.0995 , 7.2828	0.34	--	0
cg22039357	1	C1orf21	-49.603	8.16363	-65.6037 , -33.6023	1.231e-09	-------?--------	29.9		-3.83125	2.16442	-8.0735 , 0.411	0.07671	--+-	58.1		-4.38958	10.2678	-24.5144 , 15.7353	0.669	+-	44.2
cg22057874	2	OSBPL6	-65.3458	10.5265	-85.9777 , -44.7139	5.375e-10	------+------+--	30.6		-6.10122	2.53977	-11.0792 , -1.1233	0.01629	----	51.9		-1.61575	9.27053	-19.786 , 16.5545	0.8616	-+	83.7
cg22117819	22	LINC00895	-75.5263	14.5529	-104.0499 , -47.0026	2.105e-07	----+-----------	44.7		-7.02989	3.68999	-14.2623 , 0.2025	0.05676	--+-	67.2		-6.8106	12.0231	-30.3758 , 16.7546	0.5711	--	0
cg22123711	1	TNFRSF8	-41.8158	10.1288	-61.6682 , -21.9634	3.653e-05	------+--+--+---	30.7		-9.50758	3.66905	-16.6989 , -2.3162	0.009562	--+-	73.5		-32.112	12.9029	-57.4016 , -6.8224	0.01282	+-	65
cg22149555	12	GOLGA3	43.3778	9.28243	25.1842 , 61.5714	2.967e-06	-+++++--++++-+++	34.2		7.02686	2.34626	2.4282 , 11.6255	0.002745	++-+	0		3.16538	6.58076	-9.7329 , 16.0637	0.6305	+-	0
cg22164298	4	ANK2	-53.8984	13.6021	-80.5584 , -27.2384	7.416e-05	----+-----+-+-+-	52.5		-18.3987	5.54915	-29.275 , -7.5224	0.0009145	-?--	0		-7.44456	7.80001	-22.7326 , 7.8435	0.3399	--	0
cg22202929	8	ZFPM2	-51.5957	9.72051	-70.6479 , -32.5435	1.109e-07	------+-----+---	0		-0.302627	3.66249	-7.4811 , 6.8759	0.9341	+---	0		3.46368	8.62973	-13.4506 , 20.3779	0.6882	-+	0
cg22242842	2	KCMF1	-68.5031	11.6325	-91.3027 , -45.7034	3.886e-09	-------?----+---	0		-15.3543	5.58268	-26.2964 , -4.4122	0.005953	-?+-	0		-37.4204	18.0791	-72.8555 , -1.9854	0.03847	--	65.6
cg22246785	12	KDM2B	-86.0689	12.449	-110.4689 , -61.6689	4.72e-12	----------------	21.5		-4.85056	3.59021	-11.8874 , 2.1862	0.1767	----	5.4		-10.606	13.9393	-37.927 , 16.715	0.4467	+-	0
cg22347642	8	GINS4	-62.9707	13.7231	-89.868 , -36.0733	4.461e-06	------++-+--+---	5.2		-19.1793	4.03418	-27.0863 , -11.2723	1.992e-06	----	0		-7.31755	7.32561	-21.6758 , 7.0406	0.3178	--	0
cg22386583	17	RPTOR	-45.5356	8.95578	-63.0889 , -27.9823	3.686e-07	-------?-+-----+	0		-3.63121	2.45258	-8.4383 , 1.1758	0.1387	----	0		-1.48172	11.8951	-24.7962 , 21.8327	0.9009	+-	0
cg22441770	1	CRTC2	60.5808	11.9854	37.0893 , 84.0723	4.314e-07	+++++++++++++++-	10.7		3.89429	3.33449	-2.6413 , 10.4299	0.2429	++++	0		-11.5045	13.089	-37.159 , 14.15	0.3794	--	0
cg22452230	15	DRAIC	-57.326	11.9668	-80.7809 , -33.8711	1.664e-06	-----+-?-----+--	24.8		-7.78571	2.85504	-13.3816 , -2.1898	0.006391	----	0.6		-6.30776	12.6644	-31.13 , 18.5145	0.6184	--	0
cg22540040	12	RAP1B	-51.1702	10.2012	-71.1644 , -31.1759	5.273e-07	------+?--+-----	51.8		-2.08639	2.73764	-7.4522 , 3.2794	0.446	--+-	15.7		-0.831583	4.95261	-10.5387 , 8.8755	0.8667	-+	0
cg22583147	3	TOPAZ1	-86.0204	17.2862	-119.9014 , -52.1393	6.483e-07	+-----+---------	59.5		-5.90529	3.33904	-12.4498 , 0.6392	0.07697	--+-	39.8		-17.7233	17.2886	-51.6089 , 16.1623	0.3053	-+	60.4
cg22590761	15	LOXL1-AS1	116.151	14.5582	87.6172 , 144.6854	1.482e-15	+++++++-++++++++	21.7		3.56845	3.80027	-3.8801 , 11.017	0.3477	++++	0		-1.26408	8.82073	-18.5527 , 16.0246	0.886	+-	0
cg22593432	13	FRY	-58.9857	14.9294	-88.2473 , -29.7241	7.783e-05	-+-------+------	43.9		-7.37756	3.28477	-13.8157 , -0.9394	0.0247	----	43		-19.0766	12.7373	-44.0416 , 5.8885	0.1342	-+	57.5
cg22626522	22	TEF	-67.98	17.6565	-102.5867 , -33.3732	0.0001181	--+--+----+--+--	16.1		-13.8377	5.78758	-25.1813 , -2.494	0.01681	----	0		-30.6849	16.3434	-62.7179 , 1.3481	0.06045	--	0
cg22635096	21	ADARB1	80.6125	15.8991	49.4502 , 111.7748	3.973e-07	+++-+++?++++++++	16.8		4.93709	4.09072	-3.0807 , 12.9549	0.2275	++-+	53.2		4.30999	9.94266	-15.1776 , 23.7976	0.6647	-+	56.8
cg22647738	17	CCL16	-58.1993	9.87275	-77.5499 , -38.8487	3.748e-09	------+------+--	24.3		-4.55881	2.88875	-10.2208 , 1.1031	0.1145	+---	0		-2.36877	10.3996	-22.752 , 18.0144	0.8198	--	0
cg22778120	22	PRR5	42.6814	8.77666	25.4791 , 59.8836	1.156e-06	++++++++++++++++	52.3		6.01101	2.34722	1.4105 , 10.6116	0.01044	++++	59.9		4.61655	6.11048	-7.36 , 16.5931	0.4499	++	0
cg22851200	7	TRIP6	62.4894	11.7362	39.4865 , 85.4924	1.012e-07	+++++++-++++----	64.1		5.45378	5.63757	-5.5959 , 16.5034	0.3333	+?+-	0		5.95412	11.1295	-15.8598 , 27.768	0.5927	++	0
cg22877366	1	MIIP	70.3055	9.44493	51.7934 , 88.8176	9.788e-14	++++++--++++++++	53.4		4.86746	2.71306	-0.4501 , 10.1851	0.0728	++++	0		5.55602	6.99822	-8.1605 , 19.2725	0.4272	+-	47.2
cg22877452	1	NFIA	29.9707	6.16433	17.8886 , 42.0527	1.162e-06	+++++++++++-+-+-	25.2		3.52439	1.34307	0.892 , 6.1568	0.008687	+++-	63.3		9.1651	3.45211	2.399 , 15.9312	0.007932	++	0
cg22908922	14	PACS2	77.4152	12.7652	52.3955 , 102.4349	1.323e-09	++++++-+++-++-++	52.9		8.90263	3.06957	2.8863 , 14.919	0.003728	++-+	67.2		-7.01067	9.30098	-25.2406 , 11.2192	0.451	--	0
cg22925751	12	LOC643339	-60.7807	13.3463	-86.9394 , -34.622	5.26e-06	---------+------	3.3		-6.14217	3.62468	-13.2466 , 0.9622	0.09016	--+-	52.3		-2.48437	15.361	-32.592 , 27.6232	0.8715	+-	0
cg22962123	7	HOXA3	42.4592	10.519	21.8419 , 63.0766	5.427e-05	+++++++-++-++-+-	0		5.35363	3.32509	-1.1635 , 11.8708	0.1074	++++	0		13.9826	20.8588	-26.9005 , 54.8658	0.5026	++	0
cg22996783	11	MYEOV	-80.5949	15.5582	-111.089 , -50.1007	2.216e-07	-+----+---------	30.3		-4.31933	4.81972	-13.766 , 5.1273	0.3702	--+-	0		-20.8263	13.0099	-46.3256 , 4.6731	0.1094	--	36.8
cg23032421	3	IL5RA	-49.5959	7.44152	-64.1813 , -35.0106	2.651e-11	------++----++--	61.9		0.301682	2.23866	-4.0861 , 4.6895	0.8928	-++-	0		-5.45991	5.61221	-16.4598 , 5.54	0.3306	--	0
cg23033749	7	ST7	-36.7345	10.6766	-57.6606 , -15.8083	0.0005803	---+-+------+--+	0		-8.31201	2.2899	-12.8002 , -3.8238	0.0002836	----	58.5		-6.63845	7.97778	-22.2749 , 8.998	0.4053	-+	0
cg23059461	10	PRF1	-115.566	19.9569	-154.6819 , -76.4508	7.005e-09	--------+----+--	27.6		0.260692	4.15651	-7.8861 , 8.4074	0.95	++--	15.8		-3.35433	13.0238	-28.881 , 22.1724	0.7968	+-	18.5
cg23147227	12	PTPN6	150.278	22.8977	105.3986 , 195.1577	5.273e-11	+++++++?++-+-++-	19.8		-0.098925	6.23919	-12.3277 , 12.1299	0.9873	+--+	0		13.2088	10.2481	-6.8775 , 33.2952	0.1974	++	0
cg23188579	4	SCOC	-63.5899	14.1191	-91.2633 , -35.9166	6.674e-06	---------++-----	0		-5.00749	5.91088	-16.5928 , 6.5778	0.3969	-?+-	0		0.590904	8.20149	-15.484 , 16.6658	0.9426	+-	0
cg23227726	11	CLPB	-99.1911	19.4044	-137.2236 , -61.1586	3.191e-07	----+--?--+-----	34.1		-2.11177	3.82139	-9.6017 , 5.3782	0.5805	----	0		-43.0622	15.7334	-73.8997 , -12.2248	0.0062	--	0
cg23237276	14	MIR1247	65.1012	9.32484	46.8245 , 83.3779	2.921e-12	++++++-+++++++++	44.2		3.67269	2.65863	-1.5382 , 8.8836	0.1671	-+-+	0		6.01792	7.73143	-9.1357 , 21.1715	0.4364	+-	0
cg23317857	6	TFEB	72.5415	12.7269	47.5967 , 97.4862	1.199e-08	+-+++++?++-++++-	0		18.1718	5.91334	6.5817 , 29.762	0.002119	+?++	72.7		5.11609	12.207	-18.8097 , 29.0418	0.6751	+-	0
cg23364711	13	COL4A1	-48.0786	8.70723	-65.1448 , -31.0124	3.358e-08	---------+---+-+	0		-3.5939	2.77626	-9.0354 , 1.8476	0.1955	---+	73		-2.70077	7.16777	-16.7496 , 11.3481	0.7063	-+	0
cg23369670	14	XRCC3	51.0266	11.246	28.9845 , 73.0687	5.697e-06	+++++++++++++-++	45.6		6.12202	3.11965	0.0075 , 12.2365	0.04971	+-++	75.4		9.62173	8.08276	-6.2205 , 25.4639	0.2339	++	0
cg23387597	10	ITPRIP	81.6591	15.9135	50.4686 , 112.8496	2.876e-07	+++-+-++++++-+--	4.4		4.06287	4.56121	-4.8771 , 13.0029	0.3731	++-+	82.9		-12.3972	12.551	-36.9972 , 12.2027	0.3233	+-	62.3
cg23401251	2	IFT172	-61.2745	14.1151	-88.9401 , -33.6089	1.418e-05	---+---?----+-+-	13.7		-3.62822	2.35054	-8.2353 , 0.9788	0.1227	----	42.4		-23.8726	14.9817	-53.2367 , 5.4915	0.1111	--	0
cg23404711	14	FOS	55.1256	11.2938	32.9897 , 77.2616	1.055e-06	+++++++++++++-++	25.4		0.819563	4.20528	-7.4228 , 9.0619	0.8455	+--+	0		9.1928	11.6785	-13.6971 , 32.0827	0.4312	++	0
cg23415434	2	ARHGEF4	41.9633	9.24667	23.8399 , 60.0868	5.673e-06	-+++++--++++-+++	55.2		6.34624	2.82579	0.8077 , 11.8848	0.02472	+++-	42		2.91617	5.80971	-8.4708 , 14.3032	0.6157	+-	70.3
cg23434428	10	PRKCQ	-47.2505	10.5026	-67.8356 , -26.6653	6.83e-06	----+-++-+---+--	48.4		-5.10042	3.22111	-11.4138 , 1.213	0.1133	--+-	61.6		-0.054141	10.0739	-19.7989 , 19.6906	0.9957	+-	4.8
cg23473081	12	EMP1	-121.127	24.3308	-168.8159 , -73.4391	6.413e-07	--+------+-----+	63.6		-5.50503	7.55219	-20.3073 , 9.2973	0.466	--+-	0		4.28099	11.3497	-17.9645 , 26.5265	0.706	-+	19
cg23494863	8	STAR	-87.3054	13.3307	-113.4336 , -61.1772	5.785e-11	---------+--+---	52.9		-12.629	4.24959	-20.9582 , -4.2998	0.00296	----	0		-3.49319	12.414	-27.8247 , 20.8383	0.7784	--	0
cg23513600	3	TNIK	59.3212	12.1411	35.5246 , 83.1178	1.029e-06	++-+++++++-+++++	0		3.98261	3.45336	-2.786 , 10.7512	0.2488	++--	0		22.1442	14.2719	-5.8287 , 50.117	0.1208	++	0
cg23545458	12	POLE	58.0593	11.1451	36.2149 , 79.9037	1.894e-07	++++++-++++++++-	36.4		-3.07705	4.39642	-11.694 , 5.5399	0.484	---+	52.7		12.25	8.32453	-4.066 , 28.5661	0.1411	++	0
cg23606023	16	CBFA2T3	-100.694	20.8256	-141.5117 , -59.8754	1.331e-06	--+--+-+-----+-+	29.7		-11.6777	5.21838	-21.9057 , -1.4497	0.02523	----	78.7		7.67886	11.3226	-14.5134 , 29.8711	0.4977	++	0
cg23623251	6	BMP6	-54.2476	13.0184	-79.7637 , -28.7315	3.087e-05	-+----+---+-+-+-	43.3		-7.42749	3.85408	-14.9815 , 0.1265	0.05396	----	47.4		-0.77828	16.0248	-32.1869 , 30.6304	0.9613	+-	0
cg23630423	17	RTN4RL1	62.0017	11.5636	39.3371 , 84.6663	8.239e-08	+++--+++++-++++-	37.8		4.61562	3.15511	-1.5684 , 10.7996	0.1435	++-+	48.3		-0.6936	9.13447	-18.5972 , 17.21	0.9395	-+	0
cg23661483	19	ILVBL	87.0829	13.0022	61.5987 , 112.5671	2.119e-11	++++++++++-+++++	37.1		-2.4351	4.43765	-11.1329 , 6.2627	0.5832	---+	0		14.0804	13.4129	-12.209 , 40.3697	0.2938	++	0
cg23663547	17	CCR7	102.43	16.368	70.3489 , 134.5114	3.901e-10	++++++--++++--++	42.4		0.421967	2.84345	-5.1512 , 5.9951	0.882	+--+	0		4.69761	11.7202	-18.274 , 27.6692	0.6886	+-	16.6
cg23684410	11	SIK3	-56.0776	11.2294	-78.0872 , -34.0679	5.92e-07	------+---+--+-+	28.8		-3.87542	2.5165	-8.8078 , 1.0569	0.1236	----	0		-17.9304	10.5952	-38.6969 , 2.8362	0.09059	-+	54.9
cg23693749	18	SALL3	48.6154	9.97053	29.0732 , 68.1577	1.083e-06	++-++--+++-++++-	0		7.84095	3.27324	1.4254 , 14.2565	0.0166	++++	58.3		-1.70167	9.58338	-20.4851 , 17.0817	0.8591	+-	66.4
cg23702848	14	XRCC3	49.5726	8.91822	32.0929 , 67.0523	2.72e-08	++++++++++-++-+-	39.4		4.62645	3.09515	-1.44 , 10.693	0.135	--++	77.6		4.37888	7.75412	-10.8192 , 19.577	0.5723	+-	0
cg23719157	15	STRA6	49.5719	7.45266	34.9647 , 64.1791	2.9e-11	+++-++++++-+++++	30.4		1.66354	2.26638	-2.7786 , 6.1057	0.4629	++--	24.4		-2.41383	7.79762	-17.6972 , 12.8695	0.7569	-+	0
cg23829395	12	SLC38A2	-56.4867	10.5802	-77.2238 , -35.7495	9.35e-08	--+---+---------	33		-4.36423	3.34641	-10.9232 , 2.1947	0.1922	-++-	62.1		-4.59437	9.28091	-22.785 , 13.5962	0.6206	-+	48.6
cg23865980	10	ZMIZ1	-71.5465	13.5505	-98.1055 , -44.9876	1.292e-07	--+--+-+--------	0		-5.93457	3.34614	-12.493 , 0.6239	0.07614	--+-	0		-10.6233	11.2368	-32.6475 , 11.4008	0.3445	--	0
cg23883632	14	MAP3K9	-51.2671	9.03565	-68.977 , -33.5572	1.396e-08	------------++--	40.8		-3.90086	2.43009	-8.6638 , 0.8621	0.1084	--+-	39.1		3.70442	9.6225	-15.1557 , 22.5645	0.7003	-+	38.9
cg23895055	2	NIFK	45.7355	12.2289	21.7668 , 69.7043	0.0001841	+++-++--++-++-+-	0		13.187	3.58652	6.1574 , 20.2166	0.0002361	++-+	54		20.116	12.9999	-5.3638 , 45.5958	0.1218	++	0
cg23902550	8	TIGD5	168.66	22.4057	124.7451 , 212.5754	5.17e-14	++++++++++++--+-	33.6		5.73845	3.99269	-2.0872 , 13.5641	0.1507	++++	0		-16.4634	18.0855	-51.9109 , 18.9841	0.3627	+-	63.7
cg23975840	12	MAP1LC3B2	-48.8441	8.55	-65.6021 , -32.0861	1.112e-08	------------+---	0		-7.59603	2.47502	-12.4471 , -2.745	0.002147	----	45.1		-2.35358	7.49266	-17.0392 , 12.332	0.7534	-+	0
cg23983783	13	N4BP2L1	-61.4885	13.8098	-88.5557 , -34.4214	8.486e-06	----+--------+--	38.3		-4.85062	3.84655	-12.3898 , 2.6886	0.2073	----	0		-16.3362	13.3115	-42.4267 , 9.7544	0.2197	--	0
cg23999170	1	TSPAN2	-42.4677	10.1365	-62.3352 , -22.6001	2.795e-05	----+-+--+---++-	55.4		-5.39614	3.02641	-11.3279 , 0.5356	0.07458	--+-	47.3		-9.65906	11.1034	-31.4217 , 12.1036	0.3843	+-	0
cg24013213	13	GUCY1B2	-48.2792	7.56147	-63.0997 , -33.4587	1.715e-10	-----+++--+-----	3.1		-5.04275	1.931	-8.8275 , -1.258	0.009015	----	24.6		-12.1112	6.20127	-24.2657 , 0.0433	0.05082	--	0
cg24019564	1	RUNX3	68.9455	14.1253	41.2599 , 96.631	1.055e-06	++++++++++-+++-+	52.9		10.4071	3.81926	2.9214 , 17.8929	0.006432	++-+	0		21.1656	12.378	-3.0953 , 45.4264	0.08728	++	0
cg24020157	10	RASGEF1A	-71.6647	10.7916	-92.8162 , -50.5132	3.12e-11	-------?-----+--	5.3		-8.00714	2.28238	-12.4806 , -3.5337	0.0004511	----	60.5		-9.52535	10.0403	-29.2043 , 10.1536	0.3428	--	0
cg24024833	11	LSP1	64.1234	17.0437	30.7177 , 97.5291	0.0001684	+++-+++-++-++++-	4.4		5.50671	3.26539	-0.8934 , 11.9069	0.09172	-+-+	0		16.7726	17.0547	-16.6546 , 50.1998	0.3254	++	0
cg24058805	1	PDE4B	-110.489	20.2165	-150.1137 , -70.8651	4.621e-08	------+-----+---	35.2		-18.546	7.28203	-32.8188 , -4.2732	0.01087	--+-	0		-52.3681	31.8638	-114.8212 , 10.0849	0.1003	--	0
cg24129589	5	NKD2	-124.316	27.4913	-178.1992 , -70.4334	6.125e-06	+------?-----+-+	0		-11.5596	7.73556	-26.7213 , 3.6021	0.1351	--+-	30.6		-1.61034	16.8726	-34.6807 , 31.46	0.924	--	0
cg24159436	3	PLCL2	-60.7025	10.7488	-81.7701 , -39.6349	1.629e-08	----------+--+--	0		-6.28087	2.22317	-10.6383 , -1.9235	0.004725	----	65.1		-25.7108	9.32631	-43.9904 , -7.4313	0.005837	--	12.9
cg24173182	17	HIC1	-39.2752	7.81936	-54.6012 , -23.9493	5.092e-07	-------------+-+	56.5		-4.63885	2.59531	-9.7257 , 0.448	0.07387	--+-	0		-12.7151	11.0535	-34.3799 , 8.9497	0.25	--	0
cg24318728	17	KRT36	-47.7312	10.4672	-68.2469 , -27.2156	5.113e-06	-------?--------	0		-4.8195	2.33412	-9.3944 , -0.2446	0.03894	----	31.4		-14.0857	9.04983	-31.8234 , 3.652	0.1196	--	0
cg24324628	6	NHSL1	114.142	14.9439	84.8521 , 143.4323	2.206e-14	+++++++-+++++++-	13		7.00133	4.52423	-1.8662 , 15.8688	0.1217	++-+	12.5		22.3524	12.1452	-1.4521 , 46.1569	0.0657	++	0
cg24328944	13	DZIP1	-80.3469	15.4436	-110.6164 , -50.0775	1.965e-07	+++---+------+--	61.5		-10.9022	4.40687	-19.5397 , -2.2647	0.01336	----	0		-39.5779	23.6	-85.8339 , 6.6781	0.09354	--	0
cg24352369	2	CBWD2	-59.5644	10.2235	-79.6024 , -39.5263	5.669e-09	---+---?--+-----	33.8		-6.82821	2.6441	-12.0106 , -1.6458	0.009811	----	0		-5.56028	6.96941	-19.2203 , 8.0998	0.425	--	0
cg24395117	11	CTTN	67.9746	11.1492	46.1222 , 89.8271	1.082e-09	++++++++++-+-++-	49.2		5.48451	2.77417	0.0471 , 10.9219	0.04804	+++-	71.9		14.9372	7.86619	-0.4805 , 30.3549	0.05758	++	0
cg24495681	8	COL14A1	-111.259	18.9033	-148.309 , -74.2082	3.964e-09	---+---?--------	15.5		-3.72501	3.12237	-9.8449 , 2.3948	0.2329	+---	34.3		-8.1593	25.2316	-57.6132 , 41.2946	0.7464	+-	0
cg24527636	1	AHDC1	36.8592	9.02497	19.1703 , 54.5482	4.424e-05	++++++++++-+++++	34.3		4.91414	2.24674	0.5105 , 9.3178	0.02873	++-+	35.4		-0.238245	9.3622	-18.5882 , 18.1117	0.9797	+-	22.1
cg24559796	7	JAZF1-AS1	-92.1046	11.3079	-114.268 , -69.9411	3.788e-16	-------+--+--+--	52.1		-6.37625	3.42706	-13.0933 , 0.3408	0.06281	----	27.7		6.38952	13.0823	-19.2517 , 32.0308	0.6253	++	0
cg24635112	13	RASA3	65.7397	13.5948	39.094 , 92.3855	1.327e-06	++++++++++-+--+-	30.9		3.67032	3.39414	-2.9822 , 10.3228	0.2795	++--	0		21.4335	9.67031	2.4797 , 40.3873	0.02666	++	62.7
cg24707200	1	NTRK1	-84.7607	19.9794	-123.9203 , -45.6011	2.211e-05	------+---------	0		-19.059	8.35119	-35.4273 , -2.6907	0.02248	-?+-	28.7		-19.5271	10.8394	-40.7724 , 1.7181	0.07163	--	26
cg24727480	12	KCTD10	70.8504	14.206	43.0066 , 98.6941	6.121e-07	+++-+++-++++-+++	44.6		5.73304	3.17046	-0.4811 , 11.9471	0.07057	+--+	54.5		-3.23285	7.05015	-17.0511 , 10.5854	0.6466	+-	79.3
cg24746938	2	DOCK10	-59.9721	12.958	-85.3697 , -34.5745	3.688e-06	---+---?--------	0		-7.44873	3.3546	-14.0237 , -0.8737	0.02639	--+-	56.7		-10.3466	11.4584	-32.8051 , 12.112	0.3665	--	0
cg24796852	19	GMFG	-70.5356	14.308	-98.5794 , -42.4918	8.232e-07	+-+---+?--------	0		-4.83402	3.83636	-12.3533 , 2.6853	0.2077	--+-	10.8		-8.30973	9.11368	-26.1725 , 9.5531	0.3619	--	0
cg24821554	13	GUCY1B2	-52.6206	8.3624	-69.0109 , -36.2303	3.123e-10	------+?--+-----	53.1		-6.11296	2.18104	-10.3878 , -1.8381	0.005066	----	45.5		-12.895	7.58303	-27.7578 , 1.9677	0.08903	--	0
cg24842859	1	RUNX3	85.2215	17.5002	50.9211 , 119.5219	1.117e-06	+++++++++++++++-	0		7.95133	4.87299	-1.5997 , 17.5024	0.1027	++-+	0		-3.18466	13.1955	-29.0479 , 22.6785	0.8093	--	0
cg24843003	19	DAZAP1	59.8587	12.5103	35.3386 , 84.3789	1.712e-06	+++++++-+++++-+-	45.2		3.88135	4.19705	-4.3449 , 12.1076	0.3551	-+++	9.8		-0.536477	12.5837	-25.2006 , 24.1277	0.966	+-	0
cg24953596	1	MEGF6	71.23	12.0833	47.5466 , 94.9133	3.749e-09	+++++++?++++-+++	35.5		2.09252	2.87041	-3.5335 , 7.7185	0.466	+++-	0		-5.73917	7.0486	-19.5544 , 8.0761	0.4155	-+	0
cg24973755	4	MAEA	59.478	12.6634	34.6577 , 84.2984	2.642e-06	++++++-+++-+--++	40.9		2.66478	3.29023	-3.7841 , 9.1136	0.418	-+-+	2.3		4.74639	10.3305	-15.5014 , 24.9942	0.6459	+-	0
cg25098174	17	CYB561	-123.373	20.6126	-163.7739 , -82.9726	2.159e-09	----+-+-----+---	16.6		-3.87834	4.55844	-12.8129 , 5.0562	0.3949	+---	0		-21.9685	13.2897	-48.0162 , 4.0793	0.09832	--	0
cg25122233	12	HOXC4	-36.8058	8.42552	-53.3198 , -20.2918	1.252e-05	-------------+-+	0		-6.27595	2.72942	-11.6256 , -0.9263	0.02148	----	0		-23.534	9.48011	-42.115 , -4.953	0.01305	--	29.9
cg25138553	1	HSPG2	-45.0032	12.5557	-69.6125 , -20.394	0.000338	--+-+-+?--------	0		-6.92606	2.93754	-12.6836 , -1.1685	0.01838	----	0		-7.65237	11.8519	-30.8821 , 15.5773	0.5185	--	0
cg25144135	1	TNFRSF18	-61.3122	14.8388	-90.3962 , -32.2282	3.598e-05	--+---------+---	33.9		-6.0724	2.94534	-11.8453 , -0.2995	0.03924	----	67		-20.4298	6.49461	-33.1592 , -7.7004	0.001657	--	0
cg25162533	17	METRNL	74.6611	9.40386	56.2295 , 93.0926	2.031e-15	++++++-?++++++++	48.4		1.60736	2.01542	-2.3429 , 5.5576	0.4251	-+-+	0		-5.50306	5.32815	-15.9462 , 4.9401	0.3017	--	0
cg25164589	10	C10orf107	-55.3685	10.4817	-75.9125 , -34.8244	1.275e-07	----------+--+--	40.9		-8.5273	2.58855	-13.6009 , -3.4537	0.0009869	----	38.6		-13.3083	7.06685	-27.1594 , 0.5427	0.05967	--	0
cg25199005	1	SMYD3	-71.0564	13.1855	-96.9 , -45.2127	7.087e-08	-----++------+--	7.4		-4.96816	3.30761	-11.4511 , 1.5148	0.1331	----	0		-6.8371	12.9337	-32.1871 , 18.5129	0.5971	+-	0
cg25215890	1	CD48	48.1531	10.8517	26.8837 , 69.4224	9.106e-06	+++-++-+++++++++	12.7		10.0824	3.31879	3.5775 , 16.5872	0.002382	++++	0		-2.00934	9.30897	-20.2549 , 16.2363	0.8291	-+	0
cg25311470	7	NRCAM	85.888	14.0591	58.3321 , 113.4438	1.002e-09	++++++++++++--++	50.3		5.86253	4.43009	-2.8204 , 14.5455	0.1857	++-+	0		5.28634	7.54003	-9.4921 , 20.0648	0.4832	-+	0
cg25311963	1	MIB2	71.8433	11.9024	48.5146 , 95.172	1.58e-09	+++-+++++++++-++	42.5		2.07445	3.00863	-3.8225 , 7.9714	0.4905	++--	0		-5.93121	7.47723	-20.5866 , 8.7242	0.4276	-+	20.8
cg25324164	11	FADS2	-73.0498	14.4349	-101.3423 , -44.7574	4.179e-07	--+---+--+---+--	34.2		-10.535	4.40912	-19.1769 , -1.8931	0.01688	--+-	61.3		-1.42763	13.6793	-28.2391 , 25.3838	0.9169	-+	32.8
cg25371590	2	GLI2	-35.9284	6.49725	-48.663 , -23.1938	3.206e-08	------------++--	10.2		-0.647624	3.02668	-6.5799 , 5.2847	0.8306	-?-+	0		6.09533	4.25631	-2.247 , 14.4377	0.1521	++	46.6
cg25376651	13	EEF1DP3	-62.5156	11.0492	-84.172 , -40.8592	1.532e-08	----+-----------	14.4		-3.39848	3.22708	-9.7236 , 2.9266	0.2923	+---	33.1		-6.27874	6.31363	-18.6534 , 6.096	0.32	--	0
cg25383605	6	TIAM2	65.7913	14.6761	37.0261 , 94.5564	7.364e-06	+++++++-++-+---+	56.5		8.72366	3.89035	1.0986 , 16.3488	0.02494	++-+	3.6		15.6681	11.9539	-7.7616 , 39.0978	0.19	++	0
cg25399309	5	MAST4	55.9348	13.9298	28.6324 , 83.2371	5.932e-05	++++++-+++++-+++	0		3.34422	4.08851	-4.6693 , 11.3577	0.4134	+-++	0		9.49395	6.59872	-3.4395 , 22.4274	0.1502	+-	0
cg25488206	22	RBFOX2	-122.05	23.258	-167.6359 , -76.4647	1.54e-07	-------?--+-----	0		-15.4219	7.03221	-29.205 , -1.6388	0.0283	----	34.3		-3.24342	9.01352	-20.9099 , 14.4231	0.719	+-	0
cg25513776	6	MYLK4	-59.8519	11.1443	-81.6947 , -38.0092	7.845e-08	------+?-------+	22.3		-5.08424	2.70297	-10.3821 , 0.2136	0.05997	--+-	9.7		3.52158	7.953	-12.0663 , 19.1095	0.6579	-+	0
cg25521481	6	TTBK1	-61.1712	12.1011	-84.8893 , -37.4532	4.303e-07	---+--+---------	47.2		-0.926891	3.72873	-8.2352 , 6.3814	0.8037	--+-	49		-12.6195	7.59949	-27.5145 , 2.2755	0.0968	--	0
cg25536676	1	DHCR24	-99.1891	18.2006	-134.8624 , -63.5159	5.044e-08	--+-------+-----	48.2		-4.79505	6.24908	-17.0432 , 7.4531	0.4429	-+-+	44.8		-14.7906	10.6597	-35.6836 , 6.1024	0.1653	--	0
cg25656283	10	ERCC6	-51.6195	10.3113	-71.8296 , -31.4094	5.554e-07	----+-----------	25.3		-6.91535	2.84568	-12.4929 , -1.3378	0.01509	----	20.2		-11.9925	9.66413	-30.9342 , 6.9492	0.2146	--	0
cg25662857	17	CD7	83.8074	15.4042	53.6151 , 113.9997	5.312e-08	++++++--++-+-+++	0		8.12543	3.46497	1.3341 , 14.9168	0.01903	++-+	0		-2.63548	8.43753	-19.173 , 13.9021	0.7548	+-	45.4
cg25773386	3	GPR62	-113.231	22.0594	-156.4671 , -69.9941	2.852e-07	----------+--+--	0		-18.9926	5.51962	-29.811 , -8.1741	0.0005797	--+-	62.3		4.20905	14.3037	-23.8261 , 32.2442	0.7686	+-	70.4
cg25776343	10	PALD1	-58.1278	12.1539	-81.9494 , -34.3062	1.73e-06	-------+--+--+--	24.7		-4.82324	3.22869	-11.1515 , 1.505	0.1352	----	0		-0.008336	10.6679	-20.9174 , 20.9007	0.9994	+-	3
cg25799241	8	FAM83H	50.4993	9.44167	31.9936 , 69.0049	8.866e-08	++++++-+++--++++	61.3		6.58585	2.38242	1.9163 , 11.2554	0.005704	++++	0		-0.496587	7.76017	-15.7065 , 14.7133	0.949	--	0
cg25921609	17	MYH10	39.3697	8.80686	22.1083 , 56.6312	7.809e-06	++++++-+++++++++	55.7		2.04829	3.26698	-4.355 , 8.4516	0.5307	+--+	0		-9.6957	11.8419	-32.9059 , 13.5145	0.4129	-+	0
cg25936138	5	TRIM36	64.0664	12.0834	40.3829 , 87.7498	1.145e-07	++++++--++-+-+++	46.4		-1.0327	3.72597	-8.3356 , 6.2702	0.7817	+-+-	6.3		18.2313	6.11545	6.245 , 30.2175	0.002871	++	76.6
cg25936358	13	ATP4B	-59.0689	12.9286	-84.4089 , -33.7289	4.904e-06	-------?-+----+-	21.1		-4.61326	3.77354	-12.0094 , 2.7829	0.2215	----	4.3		-31.6153	14.8104	-60.6436 , -2.5869	0.03279	--	0
cg25939371	15	CELF6	-69.7152	11.0832	-91.4384 , -47.9921	3.172e-10	---+--------++--	57.2		-10.8613	3.59304	-17.9037 , -3.819	0.002504	----	59		-4.7074	12.3151	-28.845 , 19.4302	0.7023	+-	48.4
cg25963412	4	ACOX3	55.4951	9.90916	36.0731 , 74.9171	2.139e-08	+++-+++?++++-+++	31.6		5.6629	3.03067	-0.2772 , 11.603	0.06169	++-+	62.6		1.02726	7.10397	-12.8965 , 14.951	0.885	-+	0
cg26003140	17	CCDC42	-53.069	12.6978	-77.9566 , -28.1814	2.923e-05	-+--------+---+-	39.8		-7.98478	3.08888	-14.039 , -1.9306	0.009738	--+-	18.4		-8.5946	8.36985	-24.9995 , 7.8103	0.3045	--	38.7
cg26073542	11	OSBPL5	-92.3821	17.0705	-125.8401 , -58.924	6.239e-08	------+-----++--	36.5		0.01237	11.4421	-22.4141 , 22.4388	0.9991	+?--	0		-28.2514	24.3524	-75.9821 , 19.4794	0.246	+-	56.5
cg26104196	1	IGSF9	-105.337	20.086	-144.706 , -65.9688	1.569e-07	------+?--+-++--	31.1		-10.3038	4.21976	-18.5745 , -2.033	0.01461	----	64.3		38.1425	12.7529	13.1467 , 63.1383	0.002782	++	75.1
cg26118943	5	SNX18	80.214	15.3347	50.158 , 110.27	1.687e-07	+-+++++?++++++++	26.2		-0.700169	4.21536	-8.9623 , 7.5619	0.8681	-+-+	52.4		6.82792	8.73479	-10.2923 , 23.9481	0.4344	+-	18.1
cg26165146	12	ARNTL2	-47.2572	10.3223	-67.4888 , -27.0256	4.69e-06	------++----+---	19.3		-8.00939	3.34591	-14.5674 , -1.4514	0.01668	--+-	20		-24.5746	7.77544	-39.8144 , -9.3347	0.001575	--	42.9
cg26191447	2	GLS	-86.6029	11.8262	-109.7822 , -63.4236	2.425e-13	------+---------	40.6		-3.02092	2.77234	-8.4547 , 2.4129	0.2759	+-+-	0		-11.4725	9.27843	-29.6582 , 6.7132	0.2163	--	0
cg26196087	1	NOTCH2	-76.8187	14.0499	-104.3566 , -49.2809	4.563e-08	-------------+--	36.3		-4.79983	3.25614	-11.1819 , 1.5822	0.1405	+---	41.9		-19.372	10.6458	-40.2377 , 1.4938	0.06881	+-	28.8
cg26230651	2	PAX8	77.6453	15.2	47.8533 , 107.4373	3.252e-07	++++++-++++++-++	1.7		3.73287	5.07384	-6.2119 , 13.6776	0.4619	+?++	0		4.27631	3.43989	-2.4659 , 11.0185	0.2138	++	15.7
cg26236972	2	COPS8	-40.7762	8.85586	-58.1337 , -23.4187	4.136e-06	---------------+	0.9		-2.88403	2.19457	-7.1854 , 1.4173	0.1888	--+-	19.5		6.32949	8.55574	-10.4398 , 23.0987	0.4594	++	0
cg26280998	6	KLHL31	-59.1096	14.2692	-87.0773 , -31.1419	3.436e-05	-------?------+-	45.5		-3.44924	3.6095	-10.5239 , 3.6254	0.3393	----	0		-36.6861	9.8511	-55.9943 , -17.378	0.000196	--	0
cg26297819	22	TEF	-87.7288	17.0346	-121.1165 , -54.341	2.604e-07	--+------------+	0		-9.21352	6.22429	-21.4131 , 2.9861	0.1388	+---	0		-20.4402	14.5217	-48.9028 , 8.0223	0.1593	--	0
cg26340740	11	MPEG1	-47.1471	10.7906	-68.2966 , -25.9975	1.247e-05	---+---+-----+-+	0		-3.59845	3.06871	-9.6131 , 2.4162	0.2409	----	0		-7.15656	9.77599	-26.3175 , 12.0044	0.4641	--	0
cg26357744	3	RASSF1	145.615	27.9057	90.9196 , 200.31	1.808e-07	++++++++++-+--++	30.3		22.7539	11.0112	1.1719 , 44.3359	0.03879	++++	0		43.2041	20.4388	3.1441 , 83.2641	0.03453	++	0
cg26413708	6	TRERF1	-63.2896	12.6682	-88.1193 , -38.4599	5.855e-07	------+--+------	27.3		-9.61348	4.01734	-17.4875 , -1.7395	0.01671	-+--	58.7		-12.4315	13.7491	-39.3797 , 14.5167	0.3659	--	0
cg26432350	3	NBEAL2	85.6394	15.6421	54.9808 , 116.298	4.377e-08	+++-+++++++++++-	32.8		-1.67117	4.61497	-10.7165 , 7.3742	0.7173	+--+	35.3		7.1803	9.87926	-12.183 , 26.5436	0.4673	++	0
cg26604214	17	RAP1GAP2	-64.9181	14.8906	-94.1037 , -35.7325	1.303e-05	------+--++---+-	41.7		-17.9063	5.43547	-28.5598 , -7.2528	0.0009865	----	38.2		-19.2461	15.4588	-49.5453 , 11.0532	0.2131	+-	58.6
cg26627956	2	CFLAR	65.0803	13.2115	39.1858 , 90.9747	8.391e-07	++++++++++-+++++	0		9.68251	5.20586	-0.521 , 19.886	0.0629	++-+	0		22.8445	12.9992	-2.634 , 48.3229	0.07885	++	0
cg26677394	6	RCAN2	-72.601	12.6494	-97.3939 , -47.8081	9.497e-09	------+?-----+--	24.7		-4.11412	2.45072	-8.9175 , 0.6893	0.0932	--+-	20.1		1.82231	10.5378	-18.8318 , 22.4764	0.8627	+-	0
cg26681628	16	FTO	-63.2484	10.8181	-84.452 , -42.0449	5.02e-09	------------+---	12.1		-4.08143	3.03804	-10.036 , 1.8731	0.1791	+---	29.8		-19.98	12.9885	-45.4373 , 5.4774	0.124	--	0
cg26686361	16	IRF8	-57.1915	11.3143	-79.3675 , -35.0155	4.308e-07	-------------+--	0		-3.71574	5.70035	-14.8884 , 7.4569	0.5145	-?-+	75.5		-1.61261	12.2268	-25.5772 , 22.3519	0.8951	+-	65.3
cg26709300	16	BOLA2	49.7405	10.682	28.8037 , 70.6773	3.217e-06	+-+++++++++++-+-	53.4		1.63623	3.04645	-4.3348 , 7.6073	0.5912	++++	0		-3.65546	12.1389	-27.4476 , 20.1367	0.7633	+-	59.8
cg26750893	2	RMDN2	-57.7591	9.45391	-76.2888 , -39.2295	9.991e-10	----------------	0		-7.04762	2.9523	-12.8341 , -1.2611	0.01698	----	53.1		-2.49493	9.61978	-21.3497 , 16.3598	0.7954	+-	0
cg26828842	18	SOCS6	-52.4355	11.0171	-74.029 , -30.842	1.941e-06	------------+++-	24.8		4.12801	3.41169	-2.5589 , 10.8149	0.2263	++-+	0		8.34185	7.62745	-6.6079 , 23.2917	0.2741	++	13.6
cg26833120	1	COL16A1	-59.1256	11.2518	-81.1792 , -37.072	1.482e-07	------+------+-+	35.8		-2.25652	3.19626	-8.5212 , 4.0081	0.4802	--+-	2.2		-22.7885	17.3181	-56.7321 , 11.155	0.1882	--	0
cg26881863	8	TRAPPC9	56.5047	12.8005	31.4156 , 81.5937	1.014e-05	++++++++++-++++-	0		4.57862	4.16052	-3.576 , 12.7332	0.2711	+-++	14.7		15.8759	12.3805	-8.3899 , 40.1416	0.1997	++	0
cg26884581	11	PYGM	78.4485	14.8338	49.3742 , 107.5227	1.233e-07	+++++++++++++++-	26.7		9.0977	4.65523	-0.0265 , 18.2219	0.05067	++-+	52.5		-1.5632	13.4548	-27.9345 , 24.8081	0.9075	+-	0
cg26889659	6	EXOC2	25.185	4.96566	15.4523 , 34.9177	3.94e-07	+++++++-++-++++-	47.5		1.54991	1.19426	-0.7908 , 3.8907	0.1944	+++-	0		9.233	3.64485	2.0891 , 16.3769	0.0113	++	0
cg26894079	11	CLMP	-73.5252	11.8593	-96.7694 , -50.281	5.654e-10	----------+-----	59.2		-5.58878	2.74803	-10.9749 , -0.2026	0.04198	----	0		-30.6039	12.676	-55.449 , -5.7589	0.01576	--	0
cg26906737	1	TMEM206	-80.4662	14.0994	-108.101 , -52.8315	1.149e-08	----------------	51.1		-2.80548	3.69426	-10.0462 , 4.4353	0.4476	++--	37		7.18194	14.6573	-21.5463 , 35.9102	0.6241	-+	83.8
cg26950531	19	DPF1	-49.2501	8.49399	-65.8984 , -32.6019	6.702e-09	--+---+--+---+-?	54.1		-3.2529	2.59357	-8.3363 , 1.8305	0.2098	--+-	0		-11.4952	6.16181	-23.5724 , 0.5819	0.0621	--	38
cg26995224	12	KDM2B	56.3058	10.1723	36.368 , 76.2436	3.109e-08	+++++++-++++-+++	10		1.93673	2.44358	-2.8527 , 6.7261	0.428	+++-	0		-0.708208	6.36042	-13.1746 , 11.7582	0.9113	+-	0
cg26995690	13	MIR548F5	-53.6281	8.53892	-70.3644 , -36.8918	3.376e-10	-----+------++-+	0		-0.214707	2.95563	-6.0077 , 5.5783	0.9421	-+--	0		5.71078	7.17417	-8.3506 , 19.7722	0.426	++	0
cg27051129	13	DLEU7-AS1	50.3673	12.5829	25.7048 , 75.0298	6.259e-05	++++++++++-++-+-	0		8.75459	3.09771	2.6831 , 14.8261	0.004711	++-+	0		19.132	12.7132	-5.7859 , 44.0498	0.1324	++	0
cg27066989	13	GUCY1B2	-60.424	11.3845	-82.7376 , -38.1105	1.111e-07	------++--+-----	19.1		-7.09596	2.68463	-12.3578 , -1.8341	0.008213	----	11.4		-8.48523	6.655	-21.529 , 4.5586	0.2023	--	0
cg27089226	3	ZDHHC19	-66.7562	12.6383	-91.5272 , -41.9852	1.277e-07	----------+-----	40.4		-5.24037	3.45608	-12.0143 , 1.5335	0.1294	-+--	38.7		-11.2695	7.31007	-25.5972 , 3.0582	0.1232	--	0
cg27108424	17	LOC100507351	57.2432	14.1528	29.5038 , 84.9826	5.24e-05	++-++++++++++-++	59.8		4.69048	4.05293	-3.2533 , 12.6342	0.2471	++++	0		14.3151	11.7249	-8.6656 , 37.2959	0.2221	++	0
cg27115863	22	CARD10	-83.4315	16.0939	-114.9756 , -51.8875	2.171e-07	------+?----+---	41.9		-3.99965	4.42719	-12.6769 , 4.6777	0.3663	+-+-	0		-4.01653	8.03147	-19.7582 , 11.7251	0.617	--	0
cg27132471	15	SLCO3A1	-113.458	20.4028	-153.4475 , -73.4687	2.684e-08	-------?----++--	22.5		-12.8842	7.2147	-27.025 , 1.2566	0.07413	--+-	44.7		-14.1496	11.3378	-36.3716 , 8.0724	0.212	--	0
cg27134910	2	SLC8A1	-41.4678	7.73287	-56.6242 , -26.3114	8.206e-08	-++---+---------	0		-11.4871	3.53354	-18.4128 , -4.5613	0.001151	-?--	31.9		8.46013	7.41157	-6.0665 , 22.9868	0.2537	++	0
cg27139419	15	IGF1R	-43.403	9.77181	-62.5557 , -24.2502	8.927e-06	-------------+--	29.8		-6.72292	2.70958	-12.0337 , -1.4121	0.0131	--+-	43.5		-5.10188	6.13996	-17.1362 , 6.9324	0.406	--	0
cg27168858	1	DHCR24	-68.8829	11.5917	-91.6027 , -46.163	2.809e-09	-----+----+-----	23		-5.49671	4.29705	-13.9189 , 2.9255	0.2008	----	10.1		-12.7751	10.0891	-32.5498 , 6.9996	0.2054	--	0
cg27208052	16	MMP15	-65.7045	13.3068	-91.7859 , -39.6232	7.906e-07	--+-+----------+	31.4		-6.83738	5.63291	-17.8779 , 4.2031	0.2248	----	0		-15.4022	11.7019	-38.3379 , 7.5335	0.1881	--	0
cg27217742	4	RGS12	106.338	14.2363	78.4345 , 134.2406	8.051e-14	+++++++++++++++-	0.5		5.1175	3.22579	-1.2051 , 11.44	0.1126	++-+	51.2		9.72284	6.98013	-3.9582 , 23.4039	0.1636	+-	20.5
cg27246744	3	OSBPL10	-98.1744	14.2981	-126.1986 , -70.1501	6.591e-12	----------+--+--	26.8		-10.7696	3.74008	-18.1001 , -3.439	0.003983	----	52.6		-1.47066	9.80796	-20.6943 , 17.7529	0.8808	+-	14.7
cg27292710	11	KCNJ5	74.4659	14.3234	46.392 , 102.5398	2.005e-07	++++++++++++--+-	0		2.08751	4.53511	-6.8013 , 10.9763	0.6453	-++-	25.6		19.3122	19.3798	-18.6723 , 57.2967	0.319	++	0
cg27389255	11	PSMA1	60.1833	10.9922	38.6386 , 81.7279	4.373e-08	++++++++++-+++++	47.4		5.14423	3.62109	-1.9531 , 12.2416	0.1554	+++-	51.9		7.56199	11.7111	-15.3917 , 30.5157	0.5185	+-	37.3
cg27396284	7	HDAC9	-58.2346	11.4168	-80.6116 , -35.8576	3.383e-07	----------+-----	54.8		-6.20202	3.62658	-13.3101 , 0.9061	0.08724	----	0		-17.8008	15.404	-47.9927 , 12.3911	0.2478	--	0
cg27477277	21	TRPM2	-62.667	13.0331	-88.2118 , -37.1222	1.522e-06	---+-+-+-----+--	0		-6.81138	2.92554	-12.5454 , -1.0773	0.0199	-+--	67.6		-5.06196	7.70122	-20.1563 , 10.0324	0.511	--	0
cg27485596	13	ARHGEF7	-44.6567	7.20575	-58.7799 , -30.5334	5.741e-10	----------+--+--	53.8		-2.99826	2.09604	-7.1065 , 1.11	0.1526	----	0		-6.68161	4.98775	-16.4576 , 3.0944	0.1804	--	0
cg27563968	12	GPRC5A	70.7957	15.0506	41.2965 , 100.2949	2.553e-06	+++++++-++-++-+-	52.3		7.02362	4.44685	-1.6922 , 15.7394	0.1142	++-+	38.2		13.3215	14.4396	-14.98 , 41.6231	0.3562	+-	74.7
cg27588384	3	LIMD1	-64.8718	13.003	-90.3576 , -39.386	6.069e-07	----------------	0		-7.30026	4.39065	-15.9059 , 1.3054	0.09638	----	3.6		-0.510264	7.20032	-14.6229 , 13.6024	0.9435	+-	0
cg27593537	10	SFXN3	112.589	22.871	67.7617 , 157.4161	8.533e-07	+++++++-++-+-++-	20.2		7.41319	6.54566	-5.4163 , 20.2427	0.2574	+-++	25.6		3.79481	16.8967	-29.3228 , 36.9124	0.8223	+-	0
cg27659768	16	ZNF19	-45.4905	9.4518	-64.016 , -26.965	1.488e-06	------------++--	32.6		-7.66897	3.26503	-14.0684 , -1.2695	0.01883	-+--	78.3		-4.65801	9.72462	-23.7183 , 14.4022	0.6319	+-	0
cg27661394	4	STX18-AS1	-76.3716	15.4244	-106.6035 , -46.1398	7.37e-07	------+-----++--	48.2		-10.4659	4.0682	-18.4396 , -2.4922	0.01009	--+-	20.6		-15.3476	17.9975	-50.6227 , 19.9275	0.3938	--	0
