# Supplementary material for: Meta-analysis of epigenome-wide association studies in neonates reveals widespread differential DNA methylation associated with birthweight
Source: Nat Commun. 2019 Apr 23;10:1893. doi: 10.1038/s41467-019-09671-3 (PMC6478731; doi:10.1038/s41467-019-09671-3)
Supplement: Supplementary file 7 — Supplementary Data 4 [file 41467_2019_9671_MOESM7_ESM.xlsx]

## Sheet: SData4
Supplementary Data 4. Meta-analysis results from 51 CpGs with association between methylation levels and high versus normal birth weight, after excluding preterm births, pre-eclampsia and maternal diabetes (P<1.06*10-7) Odds ratios (OR) and 95% confidence intervals (CI) are presented per 10% increase in methylation level. Chr: chromosome. Bold: CpGs with I-squared > 50
CpG	Chr	Nearest gene	OR	95% CI	P value	Direction of effect across cohorts	I-squared
cg20076442	8	MSC	0.650041	0.5877 , 0.719	5.781e-17	-+-+-------?--+--+----	67.2
cg25124943	10	KLF6	0.561126	0.4869 , 0.6466	1.39e-15	--?--------------+----	52.3
cg25953130	10	ARID5B	0.722824	0.6626 , 0.7885	2.522e-13	-+------------+--+-+--	44.9
cg00049440	9	KLF9	0.663272	0.5935 , 0.7413	4.655e-13	-+-+-------?--+--+----	56
cg17714703	19	UHRF1	1.7361	1.4863 , 2.0279	3.423e-12	+-++++++++++++++--++++	29.1
cg05387269	1	AURKAIP1	1.56208	1.3648 , 1.7879	9.454e-11	+--+++-++-+?+++++-++++	46.5
cg12798040	14	XRCC3	1.57318	1.3703 , 1.8061	1.261e-10	+++++++++-+++++++-++++	7.1
cg00531137	16	ADGRG1	0.670689	0.5936 , 0.7578	1.451e-10	---+-----+-------+----	24.4
cg14097568	1	ARHGAP29	0.637737	0.5556 , 0.732	1.615e-10	-+----+----?-----+---+	52.4
cg11303839	7	CCL26	0.788502	0.7324 , 0.8489	2.749e-10	-+-+------------+-----	0
cg07795325	4	CAMK2D	0.606482	0.519 , 0.7087	3.133e-10	-+---------?--+--+----	0
cg02402882	5	GPBP1	0.610413	0.5219 , 0.7139	6.459e-10	-----------------+----	1.4
cg02863179	10	ARID5B	0.756767	0.6926 , 0.8269	7.235e-10	-+---------------+++--	29
cg06673684	13	MCF2L	1.36031	1.2329 , 1.5008	8.535e-10	+?-+++++++-+++-++-++++	12.2
cg05548469	4	TRPC3	0.688438	0.611 , 0.7757	8.728e-10	--+++------+---------+	0
cg27168858	1	DHCR24	0.64376	0.559 , 0.7413	9.475e-10	-+------------+---+---	0
cg12180613	5	SHROOM1	0.617405	0.529 , 0.7206	9.719e-10	--+------+------++----	36.4
cg12547807	1	SPSB1	0.540857	0.4436 , 0.6594	1.217e-09	----------------++--+-	0
cg07144560	5	CSNK1A1	0.597883	0.5059 , 0.7065	1.562e-09	-+?-+------------+-+--	49.4
cg08404702	16	TSC2	1.39752	1.252 , 1.5599	2.407e-09	+--++++++++?+++++--+++	23.9
cg14459032	9	PCSK5	0.665904	0.5818 , 0.7622	3.651e-09	-??---+----+-----+----	0
cg10073091	1	DHCR24	0.359918	0.256 , 0.506	4.082e-09	++-+------++----------	5.3
cg23847843	6	ZSCAN23	1.39717	1.2493 , 1.5625	4.615e-09	++?++++-+-+-++++++-+?+	27.5
cg25144135	1	TNFRSF18	0.599637	0.5052 , 0.7117	4.948e-09	---+--+---------+---++	33.6
cg00472758	16	TBC1D24	1.67796	1.408 , 1.9997	7.31e-09	+-++-+++++++++++++++++	20.8
cg22246785	12	KDM2B	0.641318	0.5516 , 0.7456	7.506e-09	---------+-------+---+	21.7
cg13492133	1	SMG7	1.4406	1.2718 , 1.6318	9.327e-09	+-+++++++++-++-+++++++	0
cg04521626	17	PLD2	0.703723	0.624 , 0.7936	1.021e-08	-+-+-------?----+----+	56
cg13586051	3	DNASE1L3	0.673444	0.5882 , 0.7711	1.041e-08	-+--+------?--+-------	50.8
cg03796381	15	C15orf41	0.673848	0.5886 , 0.7714	1.053e-08	-+---------?-----+----	0
cg13472584	1	PRDM2	0.636978	0.5456 , 0.7437	1.138e-08	-----------------+--++	0
cg03747456	12	KRT80	0.660162	0.572 , 0.7619	1.373e-08	-+-+-------?--+--+----	47.1
cg01934756	1	ZNF691	0.693857	0.6107 , 0.7883	2.006e-08	-+--------------++---+	32.8
cg24173182	17	HIC1	0.759944	0.6903 , 0.8366	2.204e-08	-----------------++---	0
cg13344757	17	SPAG5	0.539167	0.4342 , 0.6695	2.239e-08	--------+-+---+-------	0
cg25536676	1	DHCR24	0.540187	0.435 , 0.6708	2.515e-08	---+---------+----+---	18.5
cg03486991	2	CYP27C1	0.68685	0.6015 , 0.7843	2.825e-08	--?+----------+--+-++-	47.5
cg07408552	17	ATP6V0A1	0.571609	0.4686 , 0.6972	3.415e-08	+-----+----------+---+	38
cg12804755	11	SOX6	0.741292	0.666 , 0.8251	4.228e-08	--++----------+--+----	24.3
cg07807757	7	GRB10	0.623666	0.5265 , 0.7388	4.682e-08	-+?+-------------+----	15.5
cg16398956	14	EML1	0.537455	0.4301 , 0.6717	4.776e-08	+--+------------++--++	25.4
cg03527802	16	BOLA2	1.64457	1.3753 , 1.9666	4.959e-08	--++++-++-+-++++--++++	25.7
cg14975410	3	TNIK	0.715574	0.6343 , 0.8072	5.269e-08	-----------------++---	20.8
cg12022621	1	LAX1	0.712618	0.6305 , 0.8055	5.934e-08	---------+------++--+-	28.3
cg20752878	17	ASGR1	1.44846	1.2667 , 1.6564	6.155e-08	+?-+-++++-+?++-+-+++++	27.1
cg11724366	19	FSTL3	0.691847	0.6049 , 0.7913	7.544e-08	--+--++----------+--+-	0
cg13725803	13	GUCY1B2	0.741641	0.6651 , 0.827	7.63e-08	-?-+---+---?--+--+---+	27.6
cg21121843	4	HTT	0.732304	0.6536 , 0.8205	7.839e-08	-+-------+-?----+++--+	35.6
cg04872675	12	TMEM119	1.44956	1.2654 , 1.6605	8.495e-08	+-+-++-++++-++-+++++++	37.6
cg24559796	7	JAZF1-AS1	0.683253	0.5938 , 0.7862	1.029e-07	-+-----------++-++-+--	39.8
cg14276580	13	COG6	0.673727	0.5823 , 0.7795	1.099e-07	---+--+------++--+----	6.7
