# Supplementary material for: Meta-analysis of epigenome-wide association studies in neonates reveals widespread differential DNA methylation associated with birthweight
Source: Nat Commun. 2019 Apr 23;10:1893. doi: 10.1038/s41467-019-09671-3 (PMC6478731; doi:10.1038/s41467-019-09671-3)
Supplement: Supplementary file 8 — Supplementary Data 5 [file 41467_2019_9671_MOESM8_ESM.xlsx]

## Sheet: SData5
Supplementary Data 5. Results for meta-analyses without exclusion of preterm births, pre-eclampsia or maternal diabetes; association of DNA methylation with continuous birthweight in grams (n=5414), low (n=178) versus normal (n=4197) birthweight, and high (n=1039) versus normal (n=4197) birthweight Coefficients (coef), odds ratios (OR) and 95% confidence intervals (CI) are presented per 10% incre…
A. Continuous birthweight (P < 1.06*10-7)						B. Low versus normal birthweight (P < 1.03*10-7)						C. High versus normal birthweight (P < 1.03*10-7)
CpG	Coef	95% CI	P value	Direction of effect across cohorts	I-squared	CpG	OR	95% CI	P value	Direction of effect across cohorts	I-squared	CpG	OR	95% CI	P value	Direction of effect across cohorts	I-squared
cg25953130	-81.5295	-96.6059 , -66.4532	3.004e-26	--------	63.9	cg12929983	0.164677	0.0886 , 0.3060	1.155e-08	---------	0	cg20076442	0.672946	0.5988 , 0.7563	3.024e-11	---------	32.7
cg04872675	118.617	95.3222 , 141.9114	1.858e-23	++++++++	0	cg12061127	0.0785414	0.0311 , 0.1982	7.167e-08	---------	0	cg00049440	0.664248	0.5841 , 0.7554	4.488e-10	---------	33.3
cg17714703	134.415	107.9836 , 160.8458	2.114e-23	++++++-+	66.4	cg04844207	0.0459262	0.0149 , 0.1415	8.086e-08	---------	0	cg05387269	1.62273	1.3859 , 1.9001	1.809e-09	+++++++++	55.8
cg00049440	-93.7801	-112.3992 , -75.1609	5.504e-23	--------	59.6	cg25325512	0.430069	0.3152 , 0.5868	1.028e-07	------+--	42.6	cg12798040	1.64978	1.4002 , 1.9438	2.197e-09	+++++++++	54.5
cg20076442	-85.7556	-103.2707 , -68.2405	8.284e-22	--------	77							cg08404702	1.49103	1.3065 , 1.7016	3.074e-09	+++++++++	45.3
cg13758780	129.44	102.614 , 156.265	3.155e-21	++++++++	68.1							cg07795325	0.604345	0.5104 , 0.7155	5.065e-09	---------	6.1
cg00376553	113.56	89.6994 , 137.4209	1.077e-20	++++++++	61.1							cg25124943	0.6322	0.5411 , 0.7387	7.776e-09	---------	59
cg12798040	110.95	87.404 , 134.4963	2.569e-20	++++++++	63							cg17714703	1.75223	1.4483 , 2.1199	7.846e-09	++++++-++	0
cg12723026	70.4615	55.0601 , 85.8628	3.046e-19	++++++-+	74.7							cg07144560	0.583075	0.4845 , 0.7017	1.128e-08	-+-------	0
cg25325512	61.5131	47.9791 , 75.047	5.178e-19	++++++-+	64.3							cg12022621	0.667497	0.5793 , 0.7691	2.233e-08	------+-+	37.3
cg10372921	111.94	87.2744 , 136.6053	5.836e-19	++++++-+	32.4							cg03796381	0.661814	0.5719 , 0.7658	2.989e-08	---------	0
cg08404702	86.194	66.9668 , 105.4213	1.543e-18	++++++++	34.7							cg00004089	0.547239	0.4412 , 0.6787	4.09e-08	---------	0
cg07144560	-120.992	-148.8291 , -93.1541	1.611e-17	--------	32.4							cg10853949	0.690182	0.6043 , 0.7882	4.489e-08	---------	0
cg11138362	111.569	85.6048 , 137.5326	3.693e-17	++++++-+	52.9							cg25953130	0.752548	0.6796 , 0.8333	4.561e-08	-------+-	45.9
cg11303839	-54.8524	-67.6393 , -42.0655	4.175e-17	--------	20.1							cg14097568	0.657435	0.5656 , 0.7641	4.619e-08	---------	48
cg00028013	115.324	88.3238 , 142.324	5.683e-17	++++++++	3.7							cg06378491	2.50282	1.8007 , 3.4786	4.717e-08	+++++++++	0
cg23414595	91.2354	69.352 , 113.1187	3.044e-16	++++++++	45.1							cg05614346	1.49857	1.2960 , 1.7328	4.814e-08	+++++++++	0
cg24559796	-94.0066	-116.6347 , -71.3786	3.866e-16	--------	64.5							cg19001290	0.567866	0.4633 , 0.6961	5.07e-08	---------	0
cg02983090	-77.1745	-95.7803 , -58.5686	4.3e-16	--------	53.5							cg06673684	1.35858	1.2164 , 1.5173	5.479e-08	+++++++++	0
cg13492133	85.957	65.1933 , 106.7207	4.9e-16	++++++++	6.6							cg07552087	0.637909	0.5424 , 0.7502	5.577e-08	------+--	0
cg20752878	99.3452	75.2898 , 123.4007	5.751e-16	++++++-+	27.4							cg15226659	0.616967	0.5180 , 0.7349	6.274e-08	---------	0
cg25124943	-92.5749	-115.2716 , -69.8781	1.302e-15	--------	76.3							cg11138362	1.63639	1.3678 , 1.9578	7.315e-08	++++++-+-	8.1
cg12022621	-90.8276	-113.102 , -68.5531	1.325e-15	--------	46.1							cg10950251	0.679546	0.5902 , 0.7824	7.833e-08	---------	0
cg20652404	114.165	86.1308 , 142.1983	1.441e-15	++++++-+	44							cg19295068	1.39631	1.2358 , 1.5777	8.381e-08	+++++++++	44.8
cg01418153	94.8322	71.3687 , 118.2956	2.342e-15	++++++++	14.1							cg01934756	0.695301	0.6084 , 0.7946	9.491e-08	-+-------	18.7
cg12594244	147.76	110.9 , 184.6208	3.936e-15	++++++++	4.5
cg12781678	92.9647	69.6743 , 116.2552	5.141e-15	++++++++	34.2
cg06378491	199.766	149.4936 , 250.0374	6.783e-15	++++++++	33.9
cg15233611	114.277	85.5078 , 143.0456	6.939e-15	++++++++	2.4
cg22590761	120.794	90.3693 , 151.2194	7.159e-15	++++++++	18.8
cg26950531	-68.4742	-85.7793 , -51.1691	8.802e-15	--------	70
cg14435807	142.496	106.3059 , 178.6867	1.188e-14	++++++++	0
cg09294084	70.6797	52.6088 , 88.7505	1.774e-14	++++++++	0
cg05993265	138.004	102.5407 , 173.4666	2.397e-14	++++++++	73.5
cg10829227	108.398	80.2416 , 136.5543	4.498e-14	++++++++	0
cg10117369	-87.4356	-110.1552 , -64.7159	4.593e-14	--------	23.4
cg07397493	106.433	78.7311 , 134.134	5.052e-14	++++++++	0
cg12036877	88.0673	65.1158 , 111.0189	5.448e-14	++++++++	18.5
cg17298279	195.478	144.5304 , 246.4262	5.47e-14	++++++++	72.7
cg06612130	-98.9466	-124.7429 , -73.1503	5.564e-14	------+-	1.3
cg06673684	63.7069	46.9537 , 80.4602	9.11e-14	++++++++	0
cg01515508	87.0218	64.1161 , 109.9276	9.6e-14	++++++++	53.5
cg13280041	89.9134	66.2316 , 113.5953	9.95e-14	++++++++	0
cg02149899	110.098	80.8739 , 139.3218	1.535e-13	++++++++	0
cg07105221	61.1165	44.8204 , 77.4126	1.971e-13	++++++-+	53.8
cg27106909	140.782	103.236 , 178.3275	1.994e-13	+-++++-+	62
cg17850088	72.4543	53.0584 , 91.8502	2.449e-13	++++++++	0
cg03254465	69.3925	50.7989 , 87.9861	2.577e-13	++++++++	7.5
cg24324628	110.631	80.9734 , 140.2895	2.647e-13	++++++++	0
cg19523667	102.653	75.1311 , 130.175	2.661e-13	++++++++	69.6
cg00587472	-68.3398	-86.7193 , -49.9604	3.15e-13	--------	55.5
cg18804667	53.3491	38.9256 , 67.7726	4.181e-13	++++++-+	59.7
cg05575921	94.4702	68.8187 , 120.1216	5.261e-13	++++++++	23.3
cg06336535	112.949	82.2383 , 143.6591	5.652e-13	++++++-+	33.9
cg15283950	98.4767	71.5243 , 125.4291	7.991e-13	+-++++++	37.1
cg13586051	-80.8607	-103.0347 , -58.6867	8.843e-13	--------	59.2
cg07317017	119.67	86.7915 , 152.5476	9.749e-13	++++++++	0
cg15822394	103.311	74.8738 , 131.7491	1.075e-12	++++++-+	57.5
cg14397120	127.577	92.3835 , 162.7698	1.202e-12	++++++-+	2.2
cg14651616	158.05	114.4431 , 201.6564	1.213e-12	++++++++	73.9
cg00472758	97.1011	70.1573 , 124.045	1.623e-12	++++++++	77.9
cg18299068	101.764	73.5128 , 130.0159	1.664e-12	++++++++	72.7
cg03434029	116.106	83.7336 , 148.4794	2.071e-12	+-++++++	44.8
cg02863179	-52.0521	-66.5667 , -37.5376	2.081e-12	--------	64.7
cg03162410	152.398	109.7631 , 195.0333	2.453e-12	++++++++	71.6
cg21221767	-94.8577	-121.5369 , -68.1786	3.197e-12	--------	79.9
cg01815912	105.353	75.7108 , 134.9954	3.258e-12	++++++++	83.7
cg00531137	-70.6801	-90.5931 , -50.7672	3.477e-12	--------	80
cg19260606	-62.2046	-79.7863 , -44.6229	4.076e-12	-+------	67.3
cg00000714	157.865	113.1161 , 202.6131	4.695e-12	++++++++	0
cg14292823	141.253	101.205 , 181.3004	4.741e-12	++++++-+	43
cg03173827	123.201	88.2486 , 158.1536	4.894e-12	++++++++	0
cg06850687	-91.8998	-118.0453 , -65.7542	5.608e-12	--------	64.3
cg23902550	164.95	117.9193 , 211.9805	6.23e-12	++++++-+	38.7
cg26432350	112.657	80.209 , 145.1054	1.011e-11	++++++-+	58.2
cg14097568	-67.6024	-87.0843 , -48.1204	1.038e-11	--------	69.3
cg08282819	-70.2574	-90.5226 , -49.9922	1.082e-11	--------	69.7
cg19379721	95.6286	68.0446 , 123.2125	1.083e-11	++++++++	58.7
cg07677157	-54.3318	-70.0265 , -38.6371	1.16e-11	--------	0
cg02431260	112.349	79.867 , 144.8304	1.208e-11	++++++-+	53.4
cg10453071	98.4275	69.8475 , 127.0076	1.477e-11	++++++++	0
cg09476997	54.7723	38.8005 , 70.7441	1.799e-11	++++++++	0
cg18702935	-102.157	-131.996 , -72.3172	1.944e-11	------+-	68.2
cg08005122	-119.505	-154.4221 , -84.5884	1.97e-11	--------	68
cg08108224	-90.8851	-117.5277 , -64.2425	2.292e-11	--------	19
cg20692268	-59.4818	-76.9595 , -42.0041	2.55e-11	----+---	73.4
cg23630423	77.9256	55.0268 , 100.8244	2.559e-11	++++++++	13.9
cg19374752	83.3919	58.885 , 107.8988	2.567e-11	+-++++++	0
cg07807757	-93.0879	-120.4457 , -65.7301	2.573e-11	------+-	18.1
cg19295068	60.3933	42.64 , 78.1467	2.601e-11	++++++++	62.7
cg16014606	85.8926	60.6325 , 111.1527	2.653e-11	++++++-+	59.5
cg02821342	-99.5735	-128.9307 , -70.2164	2.973e-11	--------	29
cg02397552	70.9471	49.9455 , 91.9487	3.562e-11	++++++-+	43.2
cg26438325	-82.5871	-107.0842 , -58.0899	3.903e-11	--------	78.5
cg04968127	89.7314	63.0897 , 116.3731	4.072e-11	+-++++++	44.3
cg12750675	-74.794	-97.0735 , -52.5145	4.708e-11	--------	57.8
cg13742400	-89.8726	-116.6539 , -63.0913	4.788e-11	-+------	20.7
cg27217742	101.129	70.966 , 131.2926	4.987e-11	+-++++++	39.4
cg09790270	-99.9724	-129.8116 , -70.1332	5.143e-11	--------	72.6
cg18584067	-80.7163	-104.83 , -56.6025	5.354e-11	--------	24.8
cg23032421	-50.9295	-66.1628 , -35.6961	5.645e-11	--------	40.7
cg22908922	85.2194	59.7248 , 110.714	5.693e-11	++++++++	56.3
cg23690893	82.7683	57.9538 , 107.5829	6.254e-11	++++++++	67.4
cg17711527	-78.136	-101.6017 , -54.6702	6.738e-11	--------	38.9
cg18536994	81.3897	56.9387 , 105.8408	6.836e-11	++++++-+	68.9
cg14827929	73.0731	51.09 , 95.0563	7.262e-11	++++++++	0
cg18739367	-106.382	-138.4052 , -74.3594	7.453e-11	------+-	69.4
cg09726279	141.781	98.9693 , 184.5928	8.527e-11	++++++++	0
cg03278811	140.689	98.0547 , 183.3243	9.947e-11	++++++++	39.2
cg25164589	-71.5065	-93.2223 , -49.7906	1.09e-10	--------	37.9
cg08426200	-86.7877	-113.1574 , -60.418	1.113e-10	--------	67.6
cg05433805	-60.9239	-79.4371 , -42.4107	1.118e-10	--------	44.9
cg12804755	-56.034	-73.0846 , -38.9833	1.185e-10	--------	36.4
cg14765414	114.413	79.5738 , 149.2521	1.221e-10	++++++-+	29.7
cg21526019	106.485	74.0596 , 138.9104	1.221e-10	++++++++	36.4
cg09321238	137.135	95.3201 , 178.9501	1.293e-10	++++++++	74.5
cg04479212	76.6201	53.2192 , 100.0211	1.385e-10	++++++-+	28.8
cg14016418	-90.4835	-118.1196 , -62.8474	1.388e-10	-+----+-	48.6
cg14035521	147.802	102.6058 , 192.998	1.458e-10	++++++-+	68.1
cg19755435	-74.5466	-97.3417 , -51.7514	1.458e-10	--------	18.8
cg02753354	-111.424	-145.5158 , -77.3324	1.494e-10	--------	50.4
cg16602500	-85.663	-111.9292 , -59.3967	1.635e-10	--------	32.4
cg10073091	-170.137	-222.3329 , -117.942	1.671e-10	--------	41.7
cg14195992	101.942	70.6564 , 133.2283	1.698e-10	++++++++	54.5
cg04436755	92.9651	64.3723 , 121.5579	1.858e-10	++++++-+	8.5
cg21155834	-132.512	-173.3531 , -91.6706	2.026e-10	--------	72.1
cg08358907	88.4865	61.1851 , 115.7879	2.118e-10	++++++-+	52.6
cg11268834	95.1235	65.7513 , 124.4956	2.187e-10	++++++-+	3.1
cg12547807	-112.709	-147.6918 , -77.7266	2.704e-10	--------	55.6
cg15681239	-51.1611	-67.0484 , -35.2738	2.76e-10	----+---	72.1
cg20219891	-23.2316	-30.4493 , -16.014	2.814e-10	------+-	35.7
cg12562461	105.591	72.715 , 138.4677	3.073e-10	++?+++++	74
cg06072822	126.549	87.1234 , 165.9748	3.15e-10	++++++++	0
cg17442852	62.6062	43.0639 , 82.1485	3.405e-10	++++++++	54.8
cg00233028	81.5043	56.0207 , 106.9879	3.641e-10	++++++-+	71.8
cg05057834	127.805	87.8447 , 167.766	3.642e-10	++++++-+	27.5
cg15995125	94.7734	65.1048 , 124.4419	3.824e-10	++++++++	45.4
cg07638500	93.5782	64.2788 , 122.8776	3.851e-10	++++++++	11.3
cg06892907	-95.6055	-125.6056 , -65.6053	4.206e-10	------+-	0
cg21559223	138.41	94.8883 , 181.9317	4.567e-10	++++++-+	31.5
cg24020157	-70.4664	-92.6569 , -48.2759	4.846e-10	--------	0
cg00942920	-65.4785	-86.1068 , -44.8501	4.927e-10	--------	4
cg19744173	-105.259	-138.4225 , -72.0953	4.943e-10	----+---	62.2
cg24013213	-48.7442	-64.1078 , -33.3806	5.019e-10	--+-----	0
cg00056066	45.5936	31.1564 , 60.0309	6.024e-10	++++++++	0
cg00382138	-60.0589	-79.0796 , -41.0381	6.062e-10	--------	0
cg08274637	63.0234	43.0544 , 82.9924	6.176e-10	++++++++	6.1
cg07340025	-55.5916	-73.206 , -37.9771	6.179e-10	------+-	0
cg17353337	78.715	53.7624 , 103.6677	6.291e-10	++++++++	0
cg11950754	73.6204	50.2731 , 96.9677	6.394e-10	++++++++	63.1
cg21058822	-52.505	-69.1786 , -35.8314	6.742e-10	--------	51.7
cg20359445	102.229	69.6494 , 134.8079	7.74e-10	++++++-+	43.6
cg09695430	-71.1732	-93.866 , -48.4804	7.881e-10	--------	28.8
cg14242936	58.267	39.6775 , 76.8565	8.076e-10	+-++++++	0
cg05056497	-47.5478	-62.7289 , -32.3668	8.313e-10	--------	0
cg13872898	-26.5711	-35.0622 , -18.08	8.601e-10	------+-	48.2
cg16650073	112.476	76.5279 , 148.4239	8.648e-10	++++++++	60.6
cg14096899	51.1459	34.7736 , 67.5183	9.189e-10	++++++++	59.8
cg23944298	-69.0206	-91.126 , -46.9153	9.368e-10	--------	61.4
cg15806306	-90.0783	-118.9395 , -61.217	9.516e-10	--------	49.1
cg21516291	94.1224	63.9561 , 124.2886	9.629e-10	++++++++	66.7
cg05191655	-88.5347	-116.9373 , -60.1321	9.989e-10	--------	60.8
cg14548802	63.0903	42.8382 , 83.3425	1.022e-09	++++++-+	0
cg23917006	87.6674	59.4783 , 115.8564	1.091e-09	++++++++	65.1
cg25162533	61.7683	41.8857 , 81.651	1.136e-09	-+++++++	47.8
cg05925497	-62.9133	-83.184 , -42.6427	1.178e-09	--------	34.1
cg12520319	-97.7242	-129.2366 , -66.2118	1.215e-09	++------	57.6
cg00153395	74.4214	50.3801 , 98.4628	1.301e-09	++++++++	54.2
cg00442282	-136.746	-180.9563 , -92.5353	1.341e-09	--------	74.6
cg20671781	91.9004	62.1322 , 121.6686	1.44e-09	++++++++	70.6
cg20449670	-68.3761	-90.5508 , -46.2015	1.506e-09	----+---	59.2
cg17038235	61.2404	41.3461 , 81.1347	1.605e-09	++++++++	8
cg05851442	58.7157	39.6107 , 77.8207	1.705e-09	++++++++	0
cg09580592	57.8518	38.9643 , 76.7394	1.932e-09	++++++++	0
cg00443981	59.4987	40.0677 , 78.9298	1.954e-09	++++++++	0
cg04500896	78.4981	52.8459 , 104.1503	2e-09	++++++++	0
cg27485596	-43.8027	-58.1219 , -29.4836	2.026e-09	--------	45.4
cg21995347	61.5557	41.4085 , 81.703	2.12e-09	++++++++	43.6
cg13597554	-57.7849	-76.7058 , -38.864	2.152e-09	--+-----	64.4
cg09166091	73.8361	49.6589 , 98.0133	2.154e-09	++++++++	45.1
cg06685437	81.891	55.0686 , 108.7134	2.177e-09	+-++++++	46.2
cg02194129	58.8189	39.5032 , 78.1346	2.395e-09	++++++++	85.2
cg26750893	-58.4795	-77.6919 , -39.2671	2.432e-09	------+-	0
cg12149606	58.4132	39.1873 , 77.639	2.601e-09	++++++++	38.7
cg04396112	43.7112	29.2944 , 58.128	2.804e-09	++++++++	5
cg10469774	104.431	69.8388 , 139.0232	3.277e-09	++++++++	54.2
cg13525276	-79.7007	-106.1093 , -53.2921	3.314e-09	--------	44.3
cg26995690	-50.9192	-67.7986 , -34.0399	3.366e-09	--------	0
cg05119988	-52.1496	-69.4752 , -34.824	3.645e-09	--------	66.3
cg23702848	53.7302	35.8725 , 71.5879	3.696e-09	++++++++	52
cg18489994	-89.5787	-119.3856 , -59.7718	3.853e-09	--------	0
cg05287480	71.3244	47.5752 , 95.0736	3.948e-09	+++++++-	60.9
cg06178669	-57.2816	-76.371 , -38.1922	4.069e-09	--------	0
cg02704502	60.1497	40.0998 , 80.1996	4.103e-09	++++++-+	0
cg20014974	108.701	72.4572 , 144.9451	4.144e-09	++++++++	33.4
cg00508575	-71.7884	-95.7315 , -47.8453	4.186e-09	--------	0
cg24585377	89.0259	59.3034 , 118.7483	4.34e-09	++++++-+	22.3
cg23719157	45.6674	30.3719 , 60.963	4.859e-09	++++++++	24.7
cg20663495	84.278	56.028 , 112.5279	4.997e-09	++++++-+	52.4
cg23529896	-61.059	-81.557 , -40.561	5.27e-09	--------	51.5
cg11046602	-88.293	-117.9397 , -58.6463	5.308e-09	--------	59.8
cg09379146	-62.3568	-83.3074 , -41.4063	5.421e-09	--------	30.1
cg20204986	-52.0448	-69.5388 , -34.5508	5.51e-09	------+-	66.8
cg13282594	88.1228	58.4905 , 117.7551	5.583e-09	++++++++	65.3
cg26995224	64.1793	42.5666 , 85.792	5.876e-09	++++++++	11.9
cg17712818	-87.3939	-116.8353 , -57.9526	5.953e-09	--+-----	17.1
cg16192197	-72.2806	-96.6388 , -47.9223	6.024e-09	--------	0
cg05135499	40.3661	26.761 , 53.9711	6.053e-09	++++++++	0
cg00605777	105.728	70.0105 , 141.445	6.559e-09	++++++-+	60.8
cg10735015	-44.9368	-60.122 , -29.7516	6.627e-09	----+---	44.4
cg23661483	81.2825	53.8028 , 108.7622	6.731e-09	++++++++	63.8
cg20370909	64.9348	42.9673 , 86.9024	6.887e-09	++++++++	0
cg14154456	-51.7208	-69.2206 , -34.2209	6.924e-09	--------	0
cg17870997	-37.779	-50.5671 , -24.9908	7.028e-09	------+-	63.6
cg15962969	77.97	51.5211 , 104.4189	7.56e-09	++++++++	0
cg11171811	87.3388	57.7114 , 116.9661	7.563e-09	++++++++	48.7
cg08381620	-29.2314	-39.1661 , -19.2967	8.068e-09	--------	0
cg26627956	78.4583	51.7743 , 105.1423	8.266e-09	++++++++	35.5
cg05478824	122.579	80.8672 , 164.2918	8.42e-09	++++++++	18.2
cg08854834	-101.263	-135.7213 , -66.8039	8.422e-09	--------	2
cg10713839	-66.1498	-88.6609 , -43.6386	8.435e-09	--------	67.6
cg09996284	102.756	67.784 , 137.727	8.462e-09	++++++-+	5.1
cg08196561	41.4325	27.3203 , 55.5446	8.692e-09	++++++-+	47.6
cg17344906	70.5906	46.5314 , 94.6497	8.886e-09	++++++++	28.6
cg17758673	58.2968	38.4269 , 78.1667	8.898e-09	--++++++	56.2
cg07157107	-75.9599	-101.8556 , -50.0642	8.963e-09	----+---	63.1
cg25963412	54.4497	35.8745 , 73.0249	9.172e-09	++++++-+	61.1
cg00329157	-96.242	-129.0826 , -63.4013	9.251e-09	--------	35.8
cg18402166	91.0636	59.962 , 122.1652	9.537e-09	++?+++++	61.6
cg25215890	61.827	40.6631 , 82.9909	1.029e-08	++++++++	30.8
cg01326048	55.6508	36.5955 , 74.706	1.039e-08	++++++++	0
cg27168858	-67.9826	-91.2727 , -44.6924	1.058e-08	--------	0
cg17836177	100.188	65.8628 , 134.5135	1.06e-08	++++++-+	65.4
cg13598409	-112.614	-151.2016 , -74.0258	1.065e-08	------+-	2.1
cg20494635	91.2523	59.9828 , 122.5218	1.067e-08	++++++++	0
cg13904214	89.3484	58.707 , 119.9898	1.096e-08	++++++++	24.3
cg07986199	-75.4796	-101.4009 , -49.5583	1.148e-08	----+---	62.5
cg01715745	-79.9425	-107.425 , -52.4599	1.189e-08	------+-	68.8
cg25376651	-64.8498	-87.1602 , -42.5393	1.218e-08	--------	3.7
cg07313882	114.203	74.8977 , 153.5084	1.235e-08	++++++++	0
cg01115380	-50.0774	-67.313 , -32.8419	1.236e-08	--------	22.2
cg24859236	76.098	49.9013 , 102.2946	1.244e-08	+-++++-+	44.3
cg07738730	58.0348	38.0437 , 78.0259	1.271e-08	++++++++	0
cg26724018	-64.683	-86.9842 , -42.3817	1.31e-08	-------+	43.7
cg23404711	60.3837	39.563 , 81.2043	1.313e-08	++++++++	49
cg03996020	49.02	32.0795 , 65.9606	1.415e-08	++++++-+	42.4
cg16875057	-67.8821	-91.3599 , -44.4043	1.453e-08	--------	0
cg09888330	133.773	87.4984 , 180.0469	1.461e-08	++++++++	0
cg10084993	65.0801	42.5007 , 87.6595	1.611e-08	++++++++	47.5
cg27563968	84.684	55.3011 , 114.0669	1.615e-08	++++++++	14.1
cg09259081	44.013	28.741 , 59.2851	1.618e-08	++++++-+	45.3
cg07248377	77.2881	50.4588 , 104.1174	1.64e-08	++++++++	6.7
cg10423607	-60.6518	-81.7135 , -39.5901	1.659e-08	--------	0
cg18599081	-77.6869	-104.6709 , -50.7029	1.673e-08	------+-	0
cg17419597	120.774	78.8042 , 162.7446	1.699e-08	++++++-+	0
cg22851200	65.2339	42.5637 , 87.9042	1.701e-08	++++++--	75.1
cg27051129	73.965	48.2606 , 99.6693	1.701e-08	++++++++	0
cg13425938	90.9791	59.3121 , 122.646	1.791e-08	++++++++	17
cg12669088	-98.9576	-133.4055 , -64.5097	1.798e-08	-+------	59.2
cg00637745	-21.4085	-28.8628 , -13.9543	1.812e-08	------+-	57.1
cg07452706	108.236	70.5475 , 145.9251	1.815e-08	++++++++	42.9
cg02283735	-57.1768	-77.0944 , -37.2592	1.839e-08	--------	0
cg00558749	81.0956	52.8437 , 109.3475	1.844e-08	++++++++	0
cg13719443	93.5432	60.9423 , 126.144	1.867e-08	++++++++	41.2
cg03335624	-71.7049	-96.711 , -46.6987	1.907e-08	--------	0
cg17782974	60.1948	39.1997 , 81.1899	1.915e-08	++++++-+	0
cg17520654	-62.4637	-84.2524 , -40.6749	1.922e-08	--------	74.2
cg10755899	82.2499	53.5582 , 110.9415	1.924e-08	++++++++	0
cg14311362	-44.355	-59.833 , -28.8769	1.946e-08	------+-	61.8
cg05257202	-87.4879	-118.0186 , -56.9573	1.948e-08	--------	57.2
cg27246744	-89.2977	-120.4822 , -58.1132	1.994e-08	--------	42.3
cg23237276	55.0667	35.8278 , 74.3055	2.023e-08	++++++++	54.4
cg00602416	68.121	44.3146 , 91.9275	2.042e-08	++++++++	13
cg13382100	170.419	110.8406 , 229.9983	2.066e-08	++++++-+	68.9
cg13251842	55.8366	36.3134 , 75.3597	2.075e-08	++++++++	0
cg25909064	85.8546	55.8236 , 115.8856	2.102e-08	++++++++	21.4
cg22319147	71.7122	46.6208 , 96.8035	2.122e-08	++++++++	63.8
cg07626482	127.593	82.9434 , 172.2433	2.132e-08	++++++-+	47.7
cg15497006	-97.4415	-131.5775 , -63.3055	2.208e-08	--------	50.4
cg06500792	-71.0514	-95.9617 , -46.1411	2.264e-08	--------	48.3
cg13725803	-51.3531	-69.3582 , -33.3481	2.268e-08	--+-----	0
cg20801110	78.4616	50.9419 , 105.9814	2.295e-08	++++++++	68.1
cg16641055	73.8525	47.9381 , 99.7669	2.327e-08	++++++-+	0
cg13120986	61.5243	39.9222 , 83.1265	2.375e-08	++++++++	64.7
cg27072575	93.1515	60.4158 , 125.8872	2.443e-08	++?+++++	36.9
cg06372654	93.6442	60.729 , 126.5594	2.458e-08	-+++++++	61.9
cg03450635	78.6038	50.9722 , 106.2355	2.466e-08	++++++++	2.6
cg21611682	70.047	45.4071 , 94.6868	2.519e-08	++?+++++	83.2
cg06611426	60.2947	39.0505 , 81.5388	2.655e-08	+-++++++	39.5
cg18625289	78.9806	51.1163 , 106.8449	2.767e-08	++++++-+	44.3
cg09516200	-73.7158	-99.751 , -47.6805	2.865e-08	--------	56
cg22246785	-70.8878	-95.928 , -45.8477	2.878e-08	--------	0
cg01906801	71.3057	46.1101 , 96.5013	2.907e-08	++++++++	6
cg11701868	77.8718	50.3527 , 105.3909	2.918e-08	?+++++++	2.8
cg11539055	70.6839	45.6764 , 95.6913	3.025e-08	++++++++	0
cg07168232	-70.4757	-95.4159 , -45.5354	3.05e-08	--------	27.7
cg00654448	-119.413	-161.712 , -77.1135	3.145e-08	--------	65.6
cg18158419	72.6036	46.8771 , 98.33	3.177e-08	++++++++	65.3
cg18625627	-80.5947	-109.1569 , -52.0324	3.192e-08	--------	39.3
cg10583311	67.2554	43.4095 , 91.1013	3.239e-08	++++++++	68.7
cg25311963	66.3113	42.7914 , 89.8311	3.277e-08	++++++++	32.1
cg25513776	-65.805	-89.1552 , -42.4548	3.321e-08	--------	47.2
cg24352369	-58.6629	-79.4827 , -37.8432	3.34e-08	----+---	47.5
cg14774305	-106.33	-144.0802 , -68.5806	3.375e-08	--------	62.1
cg27646484	86.2896	55.6534 , 116.9257	3.38e-08	++++++++	76.5
cg26601310	-70.0447	-94.9371 , -45.1524	3.483e-08	--------	22.2
cg07243548	-72.2176	-97.8964 , -46.5388	3.544e-08	--------	52.6
cg15700009	69.101	44.5302 , 93.6717	3.545e-08	++++++++	52.3
cg00921266	68.6042	44.2056 , 93.0028	3.565e-08	++++++++	39.5
cg10181414	57.8453	37.2668 , 78.4239	3.599e-08	++++++++	33.7
cg04031093	-59.7921	-81.0651 , -38.519	3.609e-08	-+------	63.1
cg03918288	102.707	66.1651 , 139.2486	3.61e-08	++++++++	55.2
cg03669394	-52.7036	-71.4645 , -33.9427	3.669e-08	------+-	0
cg01979157	80.3097	51.7028 , 108.9167	3.746e-08	++++++-+	9.2
cg24058805	-120.661	-163.6701 , -77.6522	3.825e-08	------+-	35.1
cg24821554	-46.4713	-63.0846 , -29.8581	4.191e-08	--+-----	50.7
cg22164298	-81.1852	-110.2395 , -52.1308	4.332e-08	------+-	48
cg03796381	-58.7474	-79.7796 , -37.7151	4.383e-08	--------	47.8
cg03841312	73.0081	46.8523 , 99.1639	4.477e-08	++++++++	0
cg08549335	-53.8878	-73.2161 , -34.5595	4.641e-08	-------+	33.1
cg00748072	-82.7507	-112.4387 , -53.0628	4.676e-08	--------	0
cg23513600	67.9733	43.5856 , 92.3611	4.684e-08	++++++++	0
cg20236995	111.737	71.6461 , 151.8288	4.691e-08	++++++++	41.6
cg10576725	-95.4698	-129.7252 , -61.2143	4.695e-08	--------	0
cg13928490	-44.5857	-60.5846 , -28.5869	4.704e-08	--------	0
cg06967124	61.8468	39.6416 , 84.052	4.787e-08	++++++++	0
cg26191447	-67.1859	-91.3241 , -43.0477	4.886e-08	--------	53.5
cg20782117	-63.7142	-86.6463 , -40.7822	5.162e-08	----+---	57.9
cg18835596	-84.9522	-115.575 , -54.3293	5.409e-08	--------	60.3
cg08305942	-58.3576	-79.3956 , -37.3197	5.422e-08	----+-+-	35.3
cg18884368	-127.537	-173.5369 , -81.5381	5.502e-08	--?-----	78.4
cg05673882	-41.4723	-56.4378 , -26.5067	5.587e-08	--------	50.7
cg26196087	-78.0676	-106.2527 , -49.8824	5.672e-08	--------	50
cg05141333	104.335	66.6471 , 142.0239	5.763e-08	++++++++	34
cg08400424	-75.7755	-103.1492 , -48.4018	5.774e-08	-+------	21.6
cg07137429	-85.2728	-116.14 , -54.4056	6.141e-08	--------	0
cg23883632	-51.9406	-70.7432 , -33.1381	6.151e-08	--------	30.6
cg00744431	79.8733	50.9393 , 108.8073	6.28e-08	++++++++	55
cg13222915	-73.0698	-99.544 , -46.5956	6.314e-08	--------	0
cg00395063	93.3755	59.5081 , 127.2429	6.521e-08	++++++-+	63
cg12259522	89.2213	56.8577 , 121.5849	6.539e-08	+-++++++	35.5
cg11448683	96.1547	61.2678 , 131.0415	6.586e-08	++++++-+	10.6
cg24152264	-87.7789	-119.6318 , -55.9261	6.616e-08	--------	0
cg24495681	-102.653	-139.906 , -65.4001	6.63e-08	--------	30.9
cg12539124	-57.1885	-77.9463 , -36.4308	6.668e-08	-------?	0
cg03486991	-63.0921	-86.0058 , -40.1784	6.785e-08	--------	47.7
cg24750513	67.9499	43.2692 , 92.6306	6.807e-08	++++++++	0
cg12160087	81.3124	51.7738 , 110.851	6.837e-08	+-++++++	0
cg02449762	53.9859	34.3726 , 73.5991	6.855e-08	++++++++	56.7
cg25939371	-63.2589	-86.2532 , -40.2647	6.963e-08	------+-	30
cg08643339	-56.2784	-76.7406 , -35.8162	7.018e-08	+-------	72.6
cg26601496	-86.8978	-118.527 , -55.2686	7.249e-08	--------	37.3
cg17730048	67.4909	42.925 , 92.0568	7.253e-08	++++++++	43.2
cg11067407	-65.5761	-89.4587 , -41.6934	7.379e-08	--------	0
cg13696490	-52.3905	-71.4822 , -33.2989	7.509e-08	--------	32.2
cg02462416	48.4718	30.8028 , 66.1407	7.577e-08	++++++-+	28.9
cg00974255	-62.0996	-84.7444 , -39.4548	7.66e-08	--------	68.8
cg06906435	41.458	26.3281 , 56.5878	7.844e-08	++++++-+	43.8
cg04641860	53.1815	33.7574 , 72.6056	8.036e-08	++++++++	45.9
cg10420527	93.9903	59.5491 , 128.4315	8.851e-08	++++++++	42.8
cg02927346	107.783	68.2567 , 147.31	9.06e-08	++++++-+	32.5
cg04228709	48.9486	30.9839 , 66.9134	9.273e-08	++++++-+	21.8
cg14722693	-75.1754	-102.7718 , -47.579	9.334e-08	--------	0
cg03753191	-91.282	-124.7921 , -57.7718	9.343e-08	--------	4.6
cg17942763	93.4177	59.1208 , 127.7146	9.365e-08	++++++-+	54.1
cg19187682	70.7509	44.7615 , 96.7403	9.517e-08	++++++++	0
cg22039357	-43.3946	-59.3404 , -27.4488	9.613e-08	--------	39.8
cg15171911	55.0948	34.8486 , 75.3411	9.627e-08	++++++-+	21.2
cg07133097	-26.9627	-36.8724 , -17.053	9.669e-08	------+-	32.9
cg18183624	46.9816	29.6997 , 64.2635	9.911e-08	++++++-+	0
cg02355304	54.9612	34.7366 , 75.1858	1.002e-07	++++++++	53.3
cg25399309	76.9298	48.5968 , 105.2627	1.027e-07	++++++++	0
cg17725472	84.5087	53.37 , 115.6474	1.041e-07	++++++++	18.4
