# Supplementary material for: Meta-analysis of epigenome-wide association studies in neonates reveals widespread differential DNA methylation associated with birthweight
Source: Nat Commun. 2019 Apr 23;10:1893. doi: 10.1038/s41467-019-09671-3 (PMC6478731; doi:10.1038/s41467-019-09671-3)
Supplement: Supplementary file 9 — Supplementary Data 6 [file 41467_2019_9671_MOESM9_ESM.xlsx]

## Sheet: SData6
Supplementary Data 6. Comparison of 914 robust CpGs with two lists of SNP-influenced CpG probes and results from the dip test for multimodality Chr: chromosome
			Naeem et al. 2014	Chen et al. 2013
CpG	Chr	Nearest gene	SNP-influenced CpG	SNP-influenced CpG	Dip test P value (ALSPAC)
cg00028013	15	LOXL1-AS1
cg00066351	7	LINC00996
cg00075967	15	STRA6
cg00091302	1	RGS8
cg00095326	1	RHOU	yes	yes	0.995
cg00119811	5	ARHGEF28
cg00153395	1	JAK1
cg00162064	1	RNF220
cg00205605	1	FAM213B
cg00218409	2	SEMA4F	yes	yes	0.997
cg00222472	1	PBX1
cg00227665	16	KLHDC4
cg00233028	11	CD82
cg00253658	16	FTO
cg00329157	3	C3orf52
cg00350296	11	CD248
cg00382138	4	CFI
cg00394823	16	ACSM3
cg00395063	11	ARHGEF12
cg00410926	9	FAM166B	yes	yes	0.997
cg00431549	12	MGP
cg00442282	17	RARA
cg00448875	3	RAB6B
cg00496272	16	CENPT
cg00508575	12	ATP2B1
cg00533407	7	ASIC3
cg00549798	22	MKL1		yes	0.908
cg00558749	1	NADK
cg00567703	12	HOXC6
cg00587472	2	CMPK2	yes	yes	0.996
cg00591515	19	LENG8	yes	yes	0.661
cg00602416	10	SKIDA1
cg00605777	2	SEMA4C
cg00637745	2	GLI2
cg00694258	10	ARHGAP12
cg00739778	17	RAP1GAP2	yes	yes	0.93
cg00748072	2	SP3	yes	yes	0.996
cg00780426	6	HIST1H3I	yes	yes	0.904
cg00831931	10	TCF7L2
cg00873678	14	CCDC88C
cg00886780	6	SCUBE3
cg00921266	7	HOXA3
cg00930606	22	PATZ1
cg00940560	8	MBOAT4	yes		0.992
cg00942920	1	LAX1
cg00971695	14	PLEKHG3
cg01063280	6	SEC63	yes	yes	0.997
cg01066046	21	SCAF4
cg01099825	9	NELFB
cg01110839	11	SLC39A13
cg01115380	6	FOXC1	yes	yes	0.673
cg01143068	15	STARD9	yes	yes	0.934
cg01264106	22	LGALS1	yes	yes	0.983
cg01294327	19	LINGO3
cg01303055	11	GALNT18
cg01307174	3	ARPP21
cg01351032	16	CIITA
cg01368219	3	CACNA2D3
cg01400685	11	FADS2
cg01426808	8	LINC00536
cg01439112	3	CTDSPL
cg01490733	1	SKI
cg01514538	1	LINC00982
cg01515508	1	CASZ1
cg01585860	6	COL12A1
cg01619846	19	UHRF1
cg01693350	11	WT1
cg01723892	1	MAP10
cg01741041	7	ACTB
cg01815912	16	NTHL1
cg01820192	21	LINC00319
cg01832549	1	CAPZB
cg01858866	1	PABPC4
cg01877936	6	ECI2
cg01878708	2	MIR5702
cg01894038	11	NDUFC2-KCTD14
cg01899318	16	ZNF19
cg01906801	17	MED24
cg01911077	11	SF1
cg01919885	4	RGS12
cg01966974	1	BATF3	yes	yes	0.995
cg01982597	10	ERCC6	yes	yes	0.867
cg01994290	14	PLEKHG3
cg02068356	1	ROR1
cg02106534	16	CDIP1
cg02149069	12	IFFO1
cg02149899	11	PRKRIR
cg02232751	11	LDHA
cg02255004	4	PCAT4
cg02264407	13	LMO7	yes	yes	0.96
cg02283735	1	PTPRF
cg02331649	3	TMEM110
cg02332696	10	CASC10
cg02348437	2	MPP4
cg02355304	7	FBXL18
cg02370100	21	ABCG1
cg02397552	13	CLN5
cg02402882	5	GPBP1
cg02431260	11	ESAM
cg02449762	10	ASB13
cg02461269	6	ARID1B
cg02462416	11	H19
cg02473287	2	YWHAQ
cg02499214	12	RHOF
cg02504211	3	XXYLT1
cg02573176	8	SLC10A5	yes		0.996
cg02577963	19	KDM4B
cg02583484	12	HNRNPA1
cg02589672	22	TEF
cg02640173	2	GLI2
cg02704502	11	H19
cg02753354	19	HMHA1
cg02821342	7	LINC-PINT
cg02835421	1	IPO13
cg02855778	7	PTPRN2
cg02892925	8	TOX
cg02983090	16	IL21R	yes	yes	0.993
cg02988730	1	AMPD2	yes	yes	0.991
cg02997316	1	LMNA
cg03047995	14	FITM1
cg03048432	14	NIN
cg03059073	7	LINC00996
cg03144619	1	GALNT2
cg03162410	19	TECR
cg03173827	20	TCEA2	yes	yes	0.997
cg03180134	4	MAML3
cg03247245	12	GRIP1
cg03254465	1	PRDM16
cg03278811	6	FOXO3	yes	yes	0.991
cg03327570	2	ZEB2-AS1
cg03335624	5	ENC1
cg03337886	13	IRS2
cg03354508	6	STXBP5
cg03390636	15	ARNT2
cg03444940	16	TSC2
cg03445287	8	XPO7	yes	yes	0.933
cg03467001	1	RGL1	yes		0.913
cg03469471	7	NOS3	yes		0.986
cg03471593	16	LPCAT2
cg03486991	2	CYP27C1	yes	yes	0.991
cg03487027	10	ZNF503
cg03527802	16	BOLA2
cg03538922	16	KLHDC4	yes	yes	0.996
cg03543319	2	PROKR1	yes		0.861
cg03565674	11	MOB2
cg03573390	16	PLLP	yes	yes	0.969
cg03636488	12	EP400
cg03661409	2	GLS
cg03677056	17	SLFN12L
cg03679544	6	TIAM2
cg03687532	16	FTO
cg03717364	2	HAAO
cg03726147	1	DMAP1
cg03726357	8	DUSP4
cg03753191	13	EPSTI1
cg03764274	17	OXLD1
cg03796381	15	C15orf41
cg03841312	22	MIRLET7BHG	yes	yes	0.996
cg03850035	2	EPHA4	yes		0.996
cg03875678	14	GZMB
cg03930153	3	TBL1XR1	yes	yes	0.952
cg03969902	1	LINC00982
cg03996020	7	DNAJB6	yes	yes	0.869
cg04004830	2	SDPR	yes	yes	0.972
cg04011671	2	HAAO
cg04031093	1	NTPCR
cg04052013	11	TNNT3
cg04069539	16	ACSF3
cg04070976	17	LLGL2	yes	yes	0.996
cg04189326	14	CDC42BPB
cg04206967	8	TRHR
cg04221117	10	CELF2
cg04221877	1	RUNX3
cg04222728	7	KIAA1549
cg04246167	3	C3orf67	yes	yes	0.928
cg04276057	2	C2orf82
cg04304130	6	ERVFRD-1
cg04310331	11	MRPL23-AS1
cg04324917	16	KLHDC4
cg04337944	22	FBLN1
cg04396112	7	MAD1L1
cg04411893	3	SENP2
cg04436755	15	LOXL1-AS1
cg04454050	6	TREML1
cg04460609	4	LDB2
cg04479212	3	ITGA9	yes		0.995
cg04497992	16	PRR35
cg04500896	2	LOXL3
cg04522498	8	TRAPPC9
cg04523868	11	MAP4K2
cg04554131	1	RUNX3	yes	yes	0.992
cg04608933	11	KCNQ1
cg04682802	20	BTBD3
cg04821520	11	C11orf74
cg04830471	19	CCDC155	yes	yes	0.787
cg04872675	12	TMEM119
cg04884025	1	ZFYVE9
cg04904815	6	UNC5CL	yes	yes	0.99
cg04912316	17	UBALD2		yes	0.616
cg04933530	14	IRF2BPL	yes	yes	0.906
cg04945379	16	CIITA	yes	yes	0.993
cg04968127	11	MRVI1
cg04982834	1	EVI5
cg04983687	16	ZFPM1
cg05012661	4	KIAA0232
cg05056497	21	RCAN1
cg05057834	3	ITGA9
cg05061471	11	CALCA
cg05099464	11	ARHGEF12
cg05119988	4	MSMO1
cg05135499	10	SKIDA1
cg05141333	8	PLEC
cg05155595	2	ANXA4
cg05191655	4	TBC1D1
cg05208050	2	MOGS
cg05208178	2	INPP5D
cg05294455	17	MYL4
cg05343289	1	SELP
cg05349624	21	COL18A1
cg05433805	3	LRRFIP2	yes	yes	0.994
cg05460571	8	MFHAS1
cg05478824	17	ASPSCR1	yes		0.96
cg05503887	11	EHF
cg05504759	3	DUSP7
cg05512157	12	DIP2B
cg05573767	6	RPS6KA2
cg05575921	5	AHRR
cg05593411	5	PDE4D
cg05648303	4	SCOC
cg05779272	9	B4GALT1
cg05799596	13	RASA3
cg05814312	10	SVIL
cg05851442	7	HOXA3
cg05894462	7	PTPRN2	yes	yes	0.994
cg05901196	10	CCDC6	yes		0.964
cg05910124	8	TRAPPC9	yes	yes	0.993
cg05922714	16	N4BP1	yes	yes	0.993
cg05925497	11	ARHGAP42
cg05935520	5	CDH18
cg05942111	12	RASSF3
cg05950943	16	NTN3
cg06001419	7	FOXK1	yes	yes	0.823
cg06072822	13	MCF2L	yes	yes	0.682
cg06079495	10	RAB11FIP2	yes	yes	0.977
cg06178669	11	HRASLS2	yes	yes	0.985
cg06231285	7	LRCH4
cg06336535	19	FCHO1
cg06378491	11	MAP4K2
cg06388350	4	PDLIM5
cg06405563	17	MYO15B	yes	yes	0.934
cg06452184	4	ADGRL3	yes	yes	0.547
cg06462065	19	TMEM190
cg06478823	16	ACSM3
cg06500792	2	LOC400958
cg06535156	6	TIAM2
cg06560379	6	NFKBIE
cg06612130	4	LOC728175
cg06634552	6	RNF182	yes	yes	0.991
cg06673684	13	MCF2L
cg06685437	17	RAI1
cg06775523	1	MEGF6
cg06850687	12	SMARCC2
cg06870470	19	DOCK6
cg06872313	12	ATF7IP
cg06874403	10	SKIDA1
cg06890610	16	SNX29
cg06898463	10	PBLD
cg06937357	14	PACS2
cg06967124	5	FLT4
cg06996175	19	GNG7
cg07042014	14	LTB4R	yes	yes	0.991
cg07102001	16	KLHDC4
cg07105221	7	RADIL
cg07116631	16	TIGD7
cg07133097	2	GLI2
cg07137429	10	PYROXD2	yes	yes	0.99
cg07144560	5	CSNK1A1
cg07157107	8	CHRNA6	yes	yes	0.771
cg07168232	1	LAMB3	yes	yes	0.995
cg07177115	2	IL36A
cg07211044	8	TOX
cg07243202	8	NDRG1
cg07248377	16	MGRN1
cg07285708	3	TATDN2
cg07313835	1	POU2F1
cg07313882	17	TMC6
cg07317017	15	LOXL1-AS1
cg07340025	5	ANKH
cg07397493	11	MRPL23-AS1
cg07443710	10	TSPAN15
cg07452706	14	NUDT14
cg07488576	2	SDPR	yes		0.991
cg07552087	16	MLST8
cg07565042	11	RNF141
cg07565551	2	OSBPL6
cg07565956	17	ZBTB4	yes	yes	0.299
cg07579839	4	MFSD10
cg07589393	7	SKAP2	yes	yes	0.964
cg07624815	3	FGD5
cg07626482	19	SLC1A5
cg07638500	3	MYLK
cg07677157	12	RPSAP52
cg07696514	8	IKBKB
cg07699546	1	NAV1
cg07702888	1	RHBG
cg07714085	2	PRKCE
cg07732037	12	MPHOSPH9	yes	yes	0.961
cg07795325	4	CAMK2D
cg07807757	7	GRB10
cg07814318	15	KLF13
cg07815836	19	ZNF274
cg07824636	1	DUSP10	yes	yes	0.993
cg07830855	6	DST
cg07850246	11	C11orf40
cg07858848	2	HAAO	yes	yes	0.839
cg07951201	13	METTL21C	yes	yes	0.95
cg07970325	6	PRDM1	yes		0.993
cg07996594	1	RUNX3
cg08026735	2	VWA3B
cg08032483	16	CLCN7
cg08101036	7	HOXA3
cg08108224	6	PRIM2
cg08217545	19	NFIC
cg08250921	16	BANP
cg08264519	14	BRF1
cg08274637	13	DLEU7-AS1
cg08282819	16	IL21R
cg08305942	16	MAF
cg08351131	17	HEXIM2
cg08362785	22	MKL1
cg08380440	11	MIR4686
cg08381620	13	LINC00327
cg08400424	5	ARHGAP26
cg08404702	16	TSC2
cg08420923	16	ANKRD11	yes	yes	0.904
cg08422803	21	ITGB2
cg08441314	11	SORL1
cg08447200	22	PANX2
cg08471846	19	PTBP1
cg08474929	11	UPK2
cg08530838	5	TRIM36
cg08549335	7	ZNRF2
cg08571918	2	LINC01114
cg08627825	22	LINC00229	yes	yes	0.993
cg08643339	4	GALNTL6
cg08706907	11	ATG13
cg08755703	16	IRX3
cg08756594	11	LSP1
cg08787968	11	WT1
cg08817867	17	ALDH3A1
cg08818716	7	RADIL	yes	yes	0.992
cg08832695	17	HOXB-AS3	yes	yes	0.942
cg08854834	21	MAP3K7CL
cg08857310	17	LOC100507351
cg08947774	4	PALLD
cg08958168	16	SLC12A4
cg09026568	22	TRABD
cg09076584	17	SPAG5-AS1
cg09098522	10	ZNF438
cg09109520	16	ADGRG1
cg09113483	1	NFIA
cg09119776	10	SUFU
cg09121543	17	LIMD2
cg09174162	7	MAD1L1
cg09187007	1	MEGF6	yes	yes	0.888
cg09220326	3	CDCP1	yes	yes	0.995
cg09255514	16	ABCC1	yes	yes	0.93
cg09273716	20	SOGA1
cg09294084	13	MCF2L
cg09321238	1	PRDM16
cg09340403	6	TNFAIP3
cg09364590	6	TIAM2
cg09379146	3	TIPARP
cg09427944	16	ZNF688
cg09476997	16	SLC9A3R2
cg09546258	11	GAL
cg09695430	11	WT1
cg09704401	2	SERTAD2
cg09726279	17	MYBBP1A
cg09790270	1	SLC41A1
cg09825327	1	TRAF5
cg09888330	1	SH2D2A
cg09915396	17	RAP1GAP2
cg09935388	1	GFI1
cg09990613	20	TCEA2
cg10073091	1	DHCR24
cg10078415	16	ACSM3
cg10084993	16	SLC9A3R2
cg10090414	8	LINC01300
cg10117369	1	LAX1
cg10147974	12	WNT5B
cg10173172	8	TMEM65
cg10181414	19	GNG7	yes		0.944
cg10317026	1	EFNA3
cg10322443	14	MIR4708
cg10372921	15	LOXL1-AS1
cg10397819	14	EIF2B2
cg10420527	11	LRP5
cg10421188	7	CREB5
cg10423607	8	CPA6
cg10430742	11	KCNJ1
cg10453071	16	DOK4
cg10469774	11	CD82
cg10547908	15	FAM174B
cg10576725	14	MMP14
cg10583311	12	FBRSL1
cg10601624	12	PLEKHG6
cg10615591	20	RTEL1
cg10665891	12	MAP1LC3B2
cg10670376	5	ARHGAP26
cg10671066	1	SLAMF6
cg10735015	6	PHACTR2	yes	yes	0.992
cg10755899	4	FGFR3
cg10780778	6	BTN3A2
cg10814005	14	GPR68
cg10829227	19	PRKD2
cg10902738	8	ST3GAL1
cg10905180	11	OR51E2	yes	yes	0.898
cg10928544	14	CCDC88C
cg10950251	1	PIK3C2B
cg11036672	4	TRMT44
cg11046602	17	SPOP
cg11067407	11	ZW10
cg11077681	11	MRVI1
cg11115622	14	PLEKHG3
cg11125758	14	SEL1L
cg11138362	1	PRDM16	yes	yes	0.996
cg11261850	11	LRRC32
cg11268834	2	MRPL44	yes		0.995
cg11294761	17	CD7
cg11303839	7	CCL26
cg11323439	11	CREB3L1
cg11334730	6	LY86
cg11368628	11	SYT8
cg11370064	3	ROBO1
cg11417612	12	BTBD11	yes	yes	0.964
cg11474701	11	SC5D
cg11539055	4	ANTXR2
cg11659663	11	MACROD1
cg11701868	19	UHRF1
cg11835355	22	APOL3
cg11854981	6	TRERF1
cg11935041	5	FAT2	yes	yes	0.986
cg11950754	1	LRP8
cg12036877	1	PMF1-BGLAP
cg12048965	10	KLF6
cg12050271	1	LINC00982
cg12065777	17	TRPV2		yes	0.992
cg12103569	12	SFSWAP
cg12127149	14	DYNC1H1
cg12149606	14	TMED10
cg12158889	2	SUCLG1
cg12160087	12	CCDC64
cg12233463	15	TMC3
cg12259522	13	TEX29	yes	yes	0.587
cg12341429	2	TANK
cg12374579	17	ASPSCR1
cg12403889	1	DRAXIN
cg12419863	6	PLAGL1
cg12434362	5	MIR583
cg12532095	6	LINC00473
cg12547807	1	SPSB1	yes	yes	0.988
cg12562461	17	PLEKHM1P
cg12593793	1	LMNA
cg12594244	15	LOXL1-AS1
cg12655416	17	ORMDL3
cg12723026	1	KCNC4
cg12750675	7	BRAF
cg12781678	7	C7orf61
cg12798040	14	XRCC3
cg12801067	12	LOC728084
cg12804755	11	SOX6
cg12876356	1	GFI1
cg12949547	12	XRCC6BP1
cg13009654	5	EGR1
cg13065228	8	FOXH1	yes	yes	0.89
cg13149245	15	PIF1	yes	yes	0.903
cg13182599	14	ZFP36L1
cg13203135	21	C21orf33
cg13222915	1	C1orf21
cg13251842	22	MIRLET7BHG
cg13280041	6	NHSL1
cg13282594	1	PMF1-BGLAP
cg13425938	9	EGFL7
cg13430173	9	PALM2-AKAP2
cg13430552	2	DNMT3A
cg13458609	9	ENG
cg13472584	1	PRDM2
cg13492133	1	SMG7
cg13563026	4	ATP10D
cg13586051	3	DNASE1L3
cg13594630	12	KIAA1551
cg13594903	9	STOML2
cg13597554	15	FGF7
cg13598409	20	KCNK15
cg13599248	6	SLC17A5
cg13601957	8	TOX
cg13631444	8	TRHR
cg13638420	11	WT1
cg13641903	11	WT1
cg13687834	10	PITRM1
cg13696490	3	MIR548H2	yes		0.934
cg13719443	6	LOC285847
cg13725803	13	GUCY1B2	yes	yes	0.988
cg13740339	9	FBP1
cg13742400	2	DOCK10
cg13758780	9	DAB2IP
cg13827209	9	TGFBR1
cg13869942	1	THEM4	yes	yes	0.996
cg13872898	2	GLI2
cg13888509	15	STRA6
cg13904214	7	RBM33	yes	yes	0.985
cg13928490	13	GUCY1B2
cg13937905	12	RARG
cg13951007	1	LOC728989
cg13963033	5	37681
cg13993914	9	NELFB
cg13995854	7	ST7-AS2
cg14001239	10	SVIL
cg14035521	9	POLR1E
cg14071925	19	LILRA2
cg14090409	17	CCDC57
cg14096899	2	LOC150935
cg14105680	2	IL37
cg14154456	6	IBTK
cg14161821	9	KDM4C
cg14177925	14	OR4E2
cg14184907	12	LINC00936
cg14195992	8	SPIDR
cg14209730	2	LGALSL	yes	yes	0.713
cg14242936	12	GRASP
cg14251267	20	ZBTB46
cg14292823	8	TIGD5
cg14311362	2	GLI2
cg14387452	9	MLLT3
cg14397120	9	QSOX2
cg14435807	15	LOXL1-AS1
cg14459032	9	PCSK5	yes	yes	0.816
cg14527110	5	P4HA2
cg14541011	9	RALGDS
cg14548802	9	COL5A1
cg14550985	11	RIN1
cg14704980	7	INHBA
cg14717666	4	SYNPO2
cg14722693	8	CSGALNACT1	yes	yes	0.991
cg14731462	10	PTPRE	yes	yes	0.929
cg14751481	12	FBRSL1
cg14765414	13	MCF2L
cg14774305	5	WNT8A	yes	yes	0.982
cg14785527	10	STAMBPL1
cg14827643	4	RGS12
cg14827929	4	TLR3
cg14839898	11	TIMM8B
cg14875081	2	DUSP2	yes		0.925
cg14909179	11	CHID1
cg14975410	3	TNIK
cg14987354	14	LINC00911
cg14992524	8	SOX7
cg14994947	1	SLC30A7
cg15013617	20	TMEM239
cg15014975	1	RUNX3
cg15016701	12	PPM1H	yes	yes	0.97
cg15031409	1	CASZ1
cg15035133	22	CDC42EP1	yes		0.947
cg15171911	18	TCF4
cg15206445	16	SPG7
cg15226659	19	SEMA6B
cg15233611	12	SETD1B
cg15283950	11	MRVI1
cg15331996	10	ANAPC16
cg15406387	4	ENPEP
cg15446391	11	WT1
cg15513620	1	ZNF697
cg15521790	11	MAML2
cg15700009	11	LDHA
cg15741354	8	SGK223
cg15772924	12	HOXC6
cg15806306	11	KCNQ1DN
cg15895197	2	EMILIN1
cg15908975	7	GRM8
cg15930777	6	EDN1
cg15959363	4	C4orf32
cg15962969	6	NHSL1
cg15995125	1	RCC2
cg16000331	22	SREBF2
cg16001165	4	JADE1
cg16014412	1	TMEM201
cg16069079	15	DLL4
cg16097041	1	FLAD1
cg16101213	7	MIR129-1
cg16165575	1	RPE65
cg16190225	7	C7orf50	yes	yes	0.991
cg16234490	4	FAM47E
cg16323245	3	ZBTB20	yes	yes	0.978
cg16396933	10	NT5C2
cg16398956	14	EML1
cg16476991	13	RASA3
cg16520815	16	MGRN1		yes	0.999
cg16597079	6	TRERF1
cg16723994	17	BZRAP1
cg16744911	10	SCD
cg16875057	2	STK39
cg16925459	7	HDAC9
cg17036469	1	AMPD2
cg17038235	5	ERGIC1
cg17061862	11	WEE1
cg17142950	1	SAMD13
cg17163527	1	MEGF6
cg17237086	22	MKL1	yes		0.911
cg17276535	4	RGS12
cg17292662	8	ATP6V1H
cg17327171	2	RBMS1
cg17344906	19	NFIX
cg17353337	6	NHSL1
cg17442852	17	SLC43A2
cg17470397	3	OPA1
cg17711527	1	LAX1
cg17714703	19	UHRF1
cg17725019	22	PIK3IP1
cg17730048	17	PPY2P
cg17758673	4	RGS12
cg17782974	10	TRIM8
cg17783244	22	PATZ1	yes	yes	0.917
cg17819250	8	KCNU1
cg17828445	12	39873
cg17850088	1	VPS45
cg17870997	2	GLI2
cg17901584	1	DHCR24
cg17924072	19	HMHA1
cg18033092	11	C11orf49
cg18050903	4	RASGEF1B	yes	yes	0.987
cg18062064	20	TLDC2		yes	0.909
cg18219522	11	MAML2
cg18299068	4	MAEA
cg18334681	6	ENPP3
cg18402166	17	PLEKHM1P
cg18489994	4	C1QTNF7
cg18503793	22	TEF
cg18515868	4	MAEA
cg18536994	17	TMEM235
cg18584067	2	SERTAD2
cg18598117	19	ARID3A
cg18642369	13	DOCK9
cg18702935	13	SUCLA2
cg18716210	11	MRPL23-AS1
cg18804667	5	PDE4D
cg18835596	6	MYB	yes	yes	0.971
cg18857467	1	HDAC1	yes	yes	0.991
cg18944752	4	RGS12	yes	yes	1
cg19029445	17	ABR
cg19211915	11	WT1
cg19242268	20	TCEA2
cg19260606	1	KAZN
cg19265972	17	ASGR1
cg19295068	19	GLTSCR1
cg19323059	7	INHBA-AS1	yes	yes	0.609
cg19358373	12	CHFR
cg19370689	7	FBXL13
cg19374752	12	GRASP
cg19379721	19	LPAR2
cg19448816	3	PLCL2
cg19449917	3	LINC00880	yes	yes	0.993
cg19459094	5	GRK6
cg19520763	3	ACVR2B
cg19523667	7	ZMIZ2
cg19827875	1	NAV1
cg19843457	12	SFSWAP
cg19851563	19	GNG7
cg19863740	22	PARVG
cg19869443	1	SAMD13
cg19876649	18	MYOM1
cg19889855	3	PARP15
cg19914554	17	CD7
cg19935065	10	DNTT
cg20012601	4	MAML3
cg20014974	1	SLC45A1
cg20102045	13	MYO16	yes	yes	0.979
cg20141108	1	UCK2
cg20176142	8	ZBTB10	yes	yes	0.793
cg20186396	17	CD7
cg20204986	11	WT1
cg20219891	2	GLI2
cg20236995	1	PRDM16
cg20283107	8	FAM91A1
cg20309640	1	LOC730102	yes	yes	0.993
cg20357806	4	PPBP		yes	0.987
cg20359445	12	IKZF4
cg20364632	6	CRISP2
cg20370909	7	RADIL
cg20386404	1	PTPN14	yes	yes	0.914
cg20449670	1	S100A6
cg20494635	11	MRPL23-AS1
cg20519581	20	LINC01270	yes	yes	0.998
cg20635389	2	CPO	yes	yes	0.883
cg20652404	15	LOXL1
cg20658466	7	IGFBP3
cg20663495	17	B3GNTL1	yes	yes	0.679
cg20664313	12	FBRSL1
cg20717932	17	THRA
cg20730966	3	GLB1	yes	yes	0.98
cg20752878	17	ASGR1
cg20784591	7	PILRA
cg20865778	11	TCIRG1
cg20876852	7	MEST
cg20948740	2	DNMT3A
cg21058822	8	MIR548O2
cg21121843	4	HTT
cg21141329	17	COL1A1
cg21155834	2	MBD5	yes	yes	0.991
cg21193744	8	MCPH1	yes	yes	0.911
cg21220721	1	ACOT7
cg21221712	15	AKAP13	yes	yes	0.991
cg21221767	14	MAX
cg21228424	6	PRPH2
cg21249754	12	PTPN6	yes	yes	0.843
cg21369801	17	CSNK1D
cg21454485	1	CD84	yes	yes	0.992
cg21505925	21	DYRK1A
cg21516291	20	SLC35C2		yes	0.703
cg21520055	14	NDRG2
cg21542842	4	40787	yes	yes	0.92
cg21554670	17	GAS7
cg21586223	13	CYSLTR2	yes	yes	0.994
cg21597811	8	ZHX2
cg21601493	13	IRS2	yes	yes	0.999
cg21609804	11	MARK2
cg21646032	3	RARB
cg21649604	22	RPL3
cg21684021	1	CELSR2
cg21690489	11	CREB3L1
cg21703988	12	EP400
cg21707172	6	TIAM2
cg21726551	12	ADGRD1
cg21785384	1	TMCC2	yes	yes	0.994
cg21788755	3	ATRIP
cg21805179	12	MPHOSPH9	yes	yes	0.974
cg21805788	1	FAM102B
cg21912938	7	JAZF1-AS1
cg21926626	8	TSNARE1
cg21995347	5	SNX18
cg22030032	19	EGLN2
cg22039357	1	C1orf21
cg22057874	2	OSBPL6
cg22117819	22	LINC00895
cg22123711	1	TNFRSF8
cg22149555	12	GOLGA3
cg22164298	4	ANK2	yes		0.99
cg22202929	8	ZFPM2	yes	yes	0.972
cg22242842	2	KCMF1
cg22246785	12	KDM2B
cg22347642	8	GINS4
cg22386583	17	RPTOR
cg22441770	1	CRTC2
cg22452230	15	DRAIC
cg22540040	12	RAP1B
cg22583147	3	TOPAZ1
cg22590761	15	LOXL1
cg22593432	13	FRY
cg22626522	22	TEF
cg22635096	21	ADARB1
cg22647738	17	CCL16
cg22778120	22	PRR5	yes	yes	0.802
cg22851200	7	TRIP6
cg22877366	1	MIIP
cg22877452	1	NFIA
cg22908922	14	PACS2
cg22925751	12	LOC643339
cg22962123	7	HOXA3
cg22996783	11	MYEOV
cg23032421	3	IL5RA
cg23033749	7	ST7
cg23059461	10	PRF1
cg23147227	12	PTPN6
cg23188579	4	SCOC
cg23227726	11	CLPB
cg23237276	14	MIR1247
cg23317857	6	TFEB
cg23364711	13	COL4A1
cg23369670	14	XRCC3	yes		0.868
cg23387597	10	ITPRIP
cg23401251	2	IFT172
cg23404711	14	FOS
cg23415434	2	ARHGEF4
cg23434428	10	PRKCQ
cg23473081	12	EMP1
cg23494863	8	STAR
cg23513600	3	TNIK
cg23545458	12	POLE	yes	yes	0.954
cg23606023	16	CBFA2T3	yes		0.893
cg23623251	6	BMP6	yes	yes	0.993
cg23630423	17	RTN4RL1
cg23661483	19	ILVBL		yes	0.991
cg23663547	17	CCR7
cg23684410	11	SIK3	yes	yes	0.936
cg23693749	18	SALL3	yes	yes	0.977
cg23702848	14	XRCC3
cg23719157	15	STRA6
cg23829395	12	SLC38A2
cg23865980	10	ZMIZ1
cg23883632	14	MAP3K9
cg23895055	2	NIFK
cg23902550	8	TIGD5
cg23975840	12	MAP1LC3B2
cg23983783	13	N4BP2L1
cg23999170	1	TSPAN2
cg24013213	13	GUCY1B2
cg24019564	1	RUNX3
cg24020157	10	RASGEF1A
cg24024833	11	LSP1
cg24058805	1	PDE4B
cg24129589	5	NKD2
cg24159436	3	PLCL2
cg24173182	17	HIC1
cg24318728	17	KRT36	yes	yes	0.935
cg24324628	6	NHSL1
cg24328944	13	DZIP1	yes	yes	0.996
cg24352369	2	CBWD2
cg24395117	11	CTTN
cg24495681	8	COL14A1
cg24527636	1	AHDC1	yes	yes	0.994
cg24559796	7	JAZF1-AS1	yes	yes	0.99
cg24635112	13	RASA3	yes	yes	0.967
cg24707200	1	NTRK1	yes	yes	0.994
cg24727480	12	KCTD10
cg24746938	2	DOCK10	yes	yes	0.813
cg24796852	19	GMFG
cg24821554	13	GUCY1B2	yes	yes	0.99
cg24842859	1	RUNX3
cg24843003	19	DAZAP1
cg24953596	1	MEGF6
cg24973755	4	MAEA
cg25098174	17	CYB561	yes		0.971
cg25122233	12	HOXC6
cg25138553	1	HSPG2
cg25144135	1	TNFRSF18
cg25162533	17	METRNL
cg25164589	10	C10orf107
cg25199005	1	SMYD3
cg25215890	1	CD48
cg25311470	7	NRCAM
cg25311963	1	MIB2
cg25324164	11	FADS2
cg25371590	2	GLI2	yes		0.923
cg25376651	13	EEF1DP3
cg25383605	6	TIAM2
cg25399309	5	MAST4
cg25488206	22	RBFOX2
cg25513776	6	MYLK4
cg25521481	6	TTBK1
cg25536676	1	DHCR24
cg25656283	10	ERCC6
cg25662857	17	CD7
cg25773386	3	GPR62
cg25776343	10	PALD1
cg25799241	8	FAM83H	yes	yes	0.995
cg25921609	17	MYH10
cg25936138	5	TRIM36
cg25936358	13	ATP4B
cg25939371	15	CELF6
cg25963412	4	ACOX3
cg26003140	17	CCDC42	yes	yes	0.948
cg26073542	11	OSBPL5
cg26104196	1	IGSF9
cg26118943	5	SNX18
cg26165146	12	ARNTL2
cg26191447	2	GLS	yes	yes	0.99
cg26196087	1	NOTCH2
cg26230651	2	PAX8
cg26236972	2	COPS8
cg26280998	6	KLHL31
cg26297819	22	TEF
cg26340740	11	MPEG1	yes	yes	0.975
cg26357744	3	RASSF1
cg26413708	6	TRERF1
cg26432350	3	NBEAL2
cg26604214	17	RAP1GAP2
cg26627956	2	CFLAR
cg26677394	6	RCAN2
cg26681628	16	FTO
cg26686361	16	IRF8	yes	yes	0.738
cg26709300	16	YPEL3
cg26750893	2	RMDN2
cg26828842	18	SOCS6
cg26833120	1	COL16A1
cg26881863	8	TRAPPC9	yes	yes	0.973
cg26884581	11	PYGM
cg26889659	6	EXOC2
cg26894079	11	CLMP		yes	0.986
cg26906737	1	TMEM206
cg26950531	19	DPF1
cg26995224	12	KDM2B
cg26995690	13	DCLK1
cg27051129	13	DLEU7-AS1
cg27066989	13	GUCY1B2
cg27089226	3	ZDHHC19
cg27108424	17	LOC100507351
cg27115863	22	CARD10
cg27132471	15	SLCO3A1
cg27134910	2	SLC8A1	yes	yes	0.992
cg27139419	15	IGF1R
cg27168858	1	DHCR24
cg27208052	16	MMP15
cg27217742	4	RGS12	yes	yes	0.448
cg27246744	3	OSBPL10
cg27292710	11	KCNJ5
cg27389255	11	PSMA1
cg27396284	7	HDAC9
cg27477277	21	TRPM2
cg27485596	13	ARHGEF7
cg27563968	12	GPRC5A
cg27588384	3	LIMD1
cg27593537	10	SFXN3
cg27659768	16	ZNF19
cg27661394	4	STX18-AS1	yes		0.938
