# Supplementary material for: Meta-analysis of epigenome-wide association studies in neonates reveals widespread differential DNA methylation associated with birthweight
Source: Nat Commun. 2019 Apr 23;10:1893. doi: 10.1038/s41467-019-09671-3 (PMC6478731; doi:10.1038/s41467-019-09671-3)
Supplement: Supplementary file 10 — Supplementary Data 7 [file 41467_2019_9671_MOESM10_ESM.xlsx]

## Sheet: SData7
Supplementary Data 7. Meta-analysis results between methylation levels and continuous birth weight in grams from look-up in methylation samples in childhood, adolescence and adulthood: results from 914 robust CpGs in main meta-analysis Coefficients (coef), standard errors (SE) and 95% confidence intervals (CI) are presented per 10% increase in methylation level. Chr: chromosome Bold: CpGs with P<…
				Newborn blood main meta-analysis				Look-up children (2-13y)					Look-up adolescents (13-18y)					Look-up adults (30-45y)
CpG	Chr	Nearest gene	Differentially methylated at all three ages (P<0.05)	Coef	SE	95% CI	P value	Coef	SE	95% CI	P value	Difference Coefs (%)	Coef	SE	95% CI	P value	Difference Coefs (%)	Coef	SE	95% CI	P value	Difference Coefs (%)
cg17714703	19	UHRF1	N	130.196	10.5635	109.49 , 150.9	6.63e-35	33.2947	16.0597	1.82 , 64.77	0.03816	-74.4273	11.4018	7.14061	-2.59 , 25.4	0.1103	-91.2426	-5.61675	25.2952	-55.2 , 43.96	0.8243	-104.314
cg04872675	12	TMEM119	N	107.126	9.50657	88.49 , 125.76	1.87e-29	10.4401	19.3574	-27.5 , 48.38	0.5897	-90.2544	-8.42169	6.27881	-20.73 , 3.88	0.1798	-107.861	14.4163	37.804	-59.68 , 88.51	0.7029	-86.5427
cg12798040	14	XRCC3	N	109.404	9.7322	90.33 , 128.48	2.55e-29	-27.1047	18.7411	-63.84 , 9.63	0.1481	-124.775	-3.53724	6.27544	-15.84 , 8.76	0.573	-103.233	-18.6964	29.5709	-76.66 , 39.26	0.5272	-117.089
cg08404702	16	TSC2	N	88.6396	8.0114	72.94 , 104.34	1.87e-28	38.8684	15.6907	8.11 , 69.62	0.01324	-56.1501	4.6599	5.15898	-5.45 , 14.77	0.3664	-94.7429	-12.1848	50.2329	-110.64 , 86.27	0.8083	-113.746
cg13758780	9	DAB2IP	N	119.873	11.4531	97.43 , 142.32	1.23e-25	9.66576	25.0447	-39.42 , 58.75	0.6995	-91.9367	-15.7768	23.7102	-62.25 , 30.7	0.5058	-113.161	18.0553	49.514	-78.99 , 115.1	0.7154	-84.938
cg18804667	5	PDE4D	N	60.3965	5.82834	48.97 , 71.82	3.67e-25	53.5308	10.6805	32.6 , 74.46	5.386e-07	-11.3678	5.87681	3.98309	-1.93 , 13.68	0.1401	-90.2696	53.3634	21.8227	10.59 , 96.14	0.01447	-11.6449
cg07144560	5	CSNK1A1	N	-116.516	11.7166	-139.48 , -93.55	2.66e-23	-5.6948	26.9736	-58.56 , 47.17	0.8328	-95.1124	2.90624	10.3467	-17.37 , 23.19	0.7788	-102.494	-1.42745	52.0277	-103.4 , 100.55	0.9781	-98.7749
cg13280041	6	NHSL1	N	97.466	9.81409	78.23 , 116.7	3.05e-23	18.208	24.011	-28.85 , 65.27	0.4483	-81.3186	12.6203	7.44109	-1.96 , 27.2	0.08988	-87.0516	-61.1348	76.6291	-211.33 , 89.06	0.425	-162.724
cg12723026	1	KCNC4	Y	68.5907	7.10595	54.66 , 82.52	4.79e-22	27.3421	11.8196	4.18 , 50.51	0.02071	-60.1374	17.0213	6.51288	4.26 , 29.79	0.008962	-75.1842	67.4264	33.6589	1.46 , 133.4	0.04515	-1.69735
cg11303839	7	CCL26	N	-48.9566	5.21724	-59.18 , -38.73	6.38e-21	-15.3761	11.8127	-38.53 , 7.78	0.193	-68.5924	-25.2304	14.9483	-54.53 , 4.07	0.09144	-48.4637	10.0948	17.2438	-23.7 , 43.89	0.5583	-120.62
cg00442282	17	RARA	N	-163.172	17.4047	-197.29 , -129.06	6.91e-21	174.773	47.9495	80.79 , 268.75	0.0002674	-207.11	-4.49229	8.91691	-21.97 , 12.98	0.6144	-97.2469	-29.4868	70.5568	-167.78 , 108.8	0.676	-81.9291
cg02983090	16	IL21R	N	-70.5337	7.54121	-85.31 , -55.75	8.51e-21	54.7523	41.3817	-26.36 , 135.86	0.1858	-177.626	21.7991	15.8696	-9.31 , 52.9	0.1696	-130.906	-12.6543	80.3819	-170.2 , 144.89	0.8749	-82.0593
cg24559796	7	JAZF1-AS1	N	-91.1018	9.75982	-110.23 , -71.97	1.02e-20	8.79788	16.8261	-24.18 , 41.78	0.6011	-109.657	2.13839	5.98081	-9.58 , 13.86	0.7207	-102.347	-9.31096	31.972	-71.98 , 53.35	0.7709	-89.7796
cg17850088	1	VPS45	N	67.7803	7.35806	53.36 , 82.2	3.21e-20	-14.4869	14.1346	-42.19 , 13.22	0.3054	-121.373	2.1315	6.15384	-9.93 , 14.19	0.7291	-96.8553	6.23628	20.3309	-33.61 , 46.08	0.759	-90.7993
cg13904214	7	RBM33	N	103.281	11.2315	81.27 , 125.29	3.73e-20	16.6906	24.4528	-31.24 , 64.62	0.4949	-83.8396	-5.60602	7.86694	-21.03 , 9.81	0.4761	-105.428	7.23744	40.3469	-71.84 , 86.32	0.8576	-92.9925
cg11138362	1	PRDM16	N	102.074	11.2249	80.07 , 124.07	9.59e-20	-41.7721	25.077	-90.92 , 7.38	0.09576	-140.923	-4.68043	5.30213	-15.07 , 5.71	0.3774	-104.585	66.9504	28.4367	11.21 , 122.69	0.01855	-34.4099
cg13492133	1	SMG7	N	77.674	8.56937	60.88 , 94.47	1.26e-19	-19.126	25.7142	-69.53 , 31.27	0.457	-124.623	-6.64096	10.817	-27.84 , 14.56	0.5393	-108.55	-45.3656	58.1234	-159.29 , 68.56	0.4351	-158.405
cg20752878	17	ASGR1	N	88.3515	9.81084	69.12 , 107.58	2.15e-19	25.184	18.4992	-11.07 , 61.44	0.1734	-71.4956	40.237	18.0591	4.84 , 75.63	0.02588	-54.458	-21.4645	29.6379	-79.55 , 36.63	0.4689	-124.294
cg14459032	9	PCSK5	N	-95.5379	10.6493	-116.41 , -74.67	2.93e-19	19.1831	19.7547	-19.54 , 57.9	0.3315	-120.079	5.41655	7.52369	-9.33 , 20.16	0.4716	-105.67	10.872	40.7044	-68.91 , 90.65	0.7894	-111.38
cg13586051	3	DNASE1L3	N	-84.3884	9.41157	-102.84 , -65.94	3.06e-19	42.8788	29.3092	-14.57 , 100.32	0.1435	-150.811	10.5948	5.98406	-1.13 , 22.32	0.07664	-112.555	40.3484	38.083	-34.29 , 114.99	0.2894	-147.813
cg00587472	2	CMPK2	N	-68.9217	7.78486	-84.18 , -53.66	8.5e-19	-2.50674	17.3765	-36.56 , 31.55	0.8853	-96.3629	12.3265	8.02094	-3.39 , 28.05	0.1243	-117.885	-8.27332	33.5555	-74.04 , 57.5	0.8053	-87.9961
cg02149899	11	PRKRIR	N	103.372	11.7186	80.4 , 126.34	1.13e-18	41.9358	16.3443	9.9 , 73.97	0.01029	-59.4322	-3.25651	6.58967	-16.17 , 9.66	0.6212	-103.15	-26.3498	35.988	-96.89 , 44.19	0.4641	-125.49
cg06673684	13	MCF2L	N	62.4435	7.1511	48.43 , 76.46	2.5e-18	-8.0245	13.1218	-33.74 , 17.69	0.5408	-112.851	-19.696	13.4585	-46.07 , 6.68	0.1433	-131.542	-13.8996	15.8161	-44.9 , 17.1	0.3795	-122.259
cg08282819	16	IL21R	N	-71.1435	8.18865	-87.19 , -55.09	3.69e-18	6.78925	49.1795	-89.6 , 103.18	0.8902	-109.543	84.8256	99.1633	-109.53 , 279.19	0.3923	-219.232	-70.9817	69.6599	-207.51 , 65.55	0.3082	-0.227428
cg12781678	7	C7orf61	N	89.6953	10.3311	69.45 , 109.94	3.89e-18	43.2041	24.3901	-4.6 , 91.01	0.0765	-51.8323	7.85862	10.0363	-11.81 , 27.53	0.4336	-91.2385	-32.5428	53.9347	-138.25 , 73.17	0.5463	-136.282
cg06378491	11	MAP4K2	N	178.166	20.5524	137.88 , 218.45	4.36e-18	-3.32763	30.8239	-63.74 , 57.09	0.914	-101.868	-14.0724	12.8203	-39.2 , 11.06	0.2724	-107.898	25.0798	54.1451	-81.04 , 131.2	0.6432	-85.9234
cg10317026	1	EFNA3	N	-173.975	20.0935	-213.36 , -134.59	4.79e-18	22.8293	38.9496	-53.51 , 99.17	0.5578	-113.122	-18.5076	7.46229	-33.13 , -3.88	0.01313	-89.3619	22.7363	71.4231	-117.25 , 162.73	0.7502	-113.069
cg10073091	1	DHCR24	N	-183.073	21.1832	-224.59 , -141.55	5.51e-18	-0.79857	35.6671	-70.71 , 69.11	0.9821	-99.5638	1.083	8.4294	-15.44 , 17.6	0.8978	-100.592	-8.71125	53.6707	-113.91 , 96.48	0.8711	-95.2416
cg10829227	19	PRKD2	N	98.4727	11.4213	76.09 , 120.86	6.59e-18	21.2224	25.8531	-29.45 , 71.89	0.4117	-78.4485	9.53488	10.3064	-10.67 , 29.74	0.3549	-90.3172	0.13184	48.1179	-94.18 , 94.44	0.9978	-99.8661
cg07397493	11	MRPL23-AS1	N	101.59	11.8396	78.38 , 124.8	9.44e-18	20.4765	26.0491	-30.58 , 71.53	0.4318	-79.8441	3.9048	8.72735	-13.2 , 21.01	0.6546	-96.1563	-13.6782	51.0923	-113.82 , 86.46	0.7889	-113.464
cg24324628	6	NHSL1	N	111.323	12.9861	85.87 , 136.78	1.01e-17	-4.15936	33.5841	-69.98 , 61.67	0.9014	-103.736	-4.66889	13.0983	-30.34 , 21	0.7215	-104.194	-172.382	58.7985	-287.63 , -57.14	0.003371	-254.848
cg19379721	19	LPAR2	N	98.7666	11.5236	76.18 , 121.35	1.03e-17	26.4467	15.0232	-3 , 55.89	0.07834	-73.2231	-4.27679	6.20925	-16.45 , 7.89	0.491	-104.33	-108.101	42.4596	-191.32 , -24.88	0.0109	-209.451
cg10372921	15	LOXL1-AS1	N	87.6787	10.2586	67.57 , 107.79	1.27e-17	56.4545	18.9511	19.31 , 93.6	0.002892	-35.6121	4.22963	4.64052	-4.87 , 13.33	0.3621	-95.176	30.689	30.1374	-28.38 , 89.76	0.3085	-64.9983
cg17782974	10	TRIM8	N	69.7212	8.18189	53.68 , 85.76	1.58e-17	12.4282	16.8656	-20.63 , 45.48	0.4612	-82.1745	2.68366	5.10855	-7.33 , 12.7	0.5994	-96.1509	-5.20534	21.6423	-47.62 , 37.21	0.8099	-107.466
cg21058822	8	MIR548O2	N	-59.2561	6.98383	-72.94 , -45.57	2.16e-17	-19.3496	12.7989	-44.44 , 5.74	0.1306	-67.3459	4.93032	4.98379	-4.84 , 14.7	0.3225	-108.32	-12.1795	27.8592	-66.78 , 42.42	0.662	-79.4461
cg22877366	1	MIIP	N	68.0042	8.01567	52.29 , 83.71	2.18e-17	5.05002	14.0104	-22.41 , 32.51	0.7185	-92.574	-4.13024	4.51424	-12.98 , 4.72	0.3602	-106.074	26.7759	24.9168	-22.06 , 75.61	0.2825	-60.6261
cg26191447	2	GLS	N	-83.5329	9.88106	-102.9 , -64.17	2.82e-17	12.8051	22.759	-31.8 , 57.41	0.5737	-115.329	2.70347	5.55057	-8.18 , 13.58	0.6262	-103.236	-1.76762	19.9401	-40.85 , 37.32	0.9294	-97.8839
cg15233611	12	SETD1B	N	96.6555	11.5094	74.1 , 119.21	4.54e-17	38.5033	22.7791	-6.14 , 83.15	0.09097	-60.1644	7.42689	6.07581	-4.48 , 19.34	0.2216	-92.3161	-2.6325	37.5614	-76.25 , 70.99	0.9441	-102.724
cg00028013	15	LOXL1-AS1	N	85.2948	10.2217	65.26 , 105.33	7.16e-17	76.7995	18.9814	39.6 , 114	5.209e-05	-9.96	8.08956	6.45517	-4.56 , 20.74	0.2101	-90.5158	18.0591	29.8952	-40.54 , 76.65	0.5458	-78.8274
cg14774305	5	WNT8A	N	-129.708	15.546	-160.18 , -99.24	7.21e-17	-60.0109	34.2312	-127.1 , 7.08	0.07958	-53.7338	-2.35488	5.7975	-13.72 , 9.01	0.6846	-98.1845	37.8774	52.3725	-64.77 , 140.53	0.4695	-129.202
cg10117369	1	LAX1	N	-72.7237	8.73809	-89.85 , -55.6	8.6e-17	17.8427	17.7802	-17.01 , 52.69	0.3156	-124.535	1.22401	4.89308	-8.37 , 10.81	0.8025	-101.683	14.3857	27.7802	-40.06 , 68.83	0.6046	-119.781
cg04968127	11	MRVI1	N	95.4281	11.466	72.95 , 117.9	8.6e-17	-7.00534	22.2856	-50.69 , 36.67	0.7533	-107.341	11.5764	6.16139	-0.5 , 23.65	0.06026	-87.869	-15.9825	28.2813	-71.41 , 39.45	0.572	-116.748
cg14096899	2	LOC150935	N	64.1433	7.74398	48.97 , 79.32	1.2e-16	-3.1514	16.7928	-36.07 , 29.76	0.8511	-104.913	-1.99844	6.03047	-13.82 , 9.82	0.7403	-103.116	-17.5809	40.7456	-97.44 , 62.28	0.6661	-127.409
cg02753354	19	HMHA1	N	-106.582	12.9979	-132.06 , -81.11	2.4e-16	24.6903	67.4605	-107.53 , 156.91	0.7144	-123.165	77.3668	95.9739	-110.74 , 265.48	0.4202	-172.589	59.6841	73.196	-83.78 , 203.15	0.4148	-155.998
cg21995347	5	SNX18	N	76.286	9.32993	58 , 94.57	2.92e-16	-0.45547	11.1415	-22.29 , 21.38	0.9674	-100.597	-0.56119	12.1308	-24.34 , 23.22	0.9631	-100.736	-5.87289	43.5718	-91.27 , 79.53	0.8928	-107.699
cg03162410	19	TECR	N	142.857	17.5457	108.47 , 177.25	3.89e-16	-60.3744	24.552	-108.5 , -12.25	0.01393	-142.262	-10.547	8.59045	-27.38 , 6.29	0.2195	-107.383	-16.9351	48.0788	-111.17 , 77.3	0.7247	-111.855
cg22590761	15	LOXL1-AS1	N	95.8526	11.8315	72.66 , 119.04	5.43e-16	106.7	22.1026	63.38 , 150.02	1.383e-06	11.3165	13.9387	4.28256	5.54 , 22.33	0.001135	-85.4582	51.9407	34.9061	-16.48 , 120.36	0.1367	-45.8119
cg01515508	1	CASZ1	N	83.5364	10.3921	63.17 , 103.9	9.1e-16	-30.9339	87.1955	-201.84 , 139.97	0.7228	-137.03	64.4887	31.2089	3.32 , 125.66	0.03879	-22.8017	-90.4162	286.745	-652.44 , 471.6	0.7525	-208.236
cg11268834	2	MRPL44	N	90.0493	11.2097	68.08 , 112.02	9.5e-16	13.7981	22.2342	-29.78 , 57.38	0.5349	-84.6772	-6.181	5.64935	-17.25 , 4.89	0.2739	-106.864	37.3273	29.8228	-21.13 , 95.78	0.2107	-58.548
cg23902550	8	TIGD5	N	142.723	17.786	107.86 , 177.58	1.02e-15	23.9992	32.6844	-40.06 , 88.06	0.4628	-83.1848	2.67881	12.2866	-21.4 , 26.76	0.8274	-98.1231	25.0479	47.7793	-68.6 , 118.7	0.6001	-82.4501
cg19260606	1	KAZN	N	-60.5197	7.57155	-75.36 , -45.68	1.32e-15	12.9662	12.7132	-11.95 , 37.88	0.3078	-121.425	-26.4927	13.5041	-52.96 , -0.02	0.04978	-56.2246	1.68254	27.3734	-51.97 , 55.33	0.951	-102.78
cg11370064	3	ROBO1	N	62.4396	7.81286	47.13 , 77.75	1.33e-15	4.38887	11.3574	-17.87 , 26.65	0.6992	-92.971	3.83089	4.5816	-5.15 , 12.81	0.4031	-93.8646	-31.277	20.1773	-70.82 , 8.27	0.1211	-150.092
cg07732037	12	MPHOSPH9	N	56.4223	7.07731	42.55 , 70.29	1.56e-15	-4.56439	15.4917	-34.93 , 25.8	0.7683	-108.09	26.0575	19.4684	-12.1 , 64.22	0.1808	-53.817	-32.4664	32.5059	-96.18 , 31.25	0.3179	-157.542
cg27217742	4	RGS12	N	92.0972	11.5977	69.37 , 114.83	2.01e-15	-6.17985	25.2741	-55.72 , 43.36	0.8068	-106.71	10.2919	7.61988	-4.64 , 25.23	0.1768	-88.8249	-20.9564	39.3876	-98.16 , 56.24	0.5947	-122.755
cg03173827	20	TCEA2	N	113.299	14.2768	85.32 , 141.28	2.09e-15	12.4873	24.0934	-34.74 , 59.71	0.6043	-88.9785	2.32074	9.13338	-15.58 , 20.22	0.7994	-97.9517	33.7579	31.6205	-28.22 , 95.73	0.2857	-70.2046
cg01877936	6	ECI2	N	-59.2559	7.46867	-73.89 , -44.62	2.12e-15	1.21891	17.2097	-32.51 , 34.95	0.9435	-102.057	4.66062	4.01847	-3.22 , 12.54	0.2461	-107.865	11.2216	26.3327	-40.39 , 62.83	0.67	-118.937
cg09294084	13	MCF2L	N	61.6743	7.78447	46.42 , 76.93	2.32e-15	-8.74558	13.3883	-34.99 , 17.5	0.5136	-114.18	-1.47427	4.8497	-10.98 , 8.03	0.7611	-102.39	-13.5027	24.0476	-60.64 , 33.63	0.5745	-121.894
cg20652404	15	LOXL1-AS1	N	85.9202	10.8571	64.64 , 107.2	2.5e-15	62.5085	22.2083	18.98 , 106.04	0.004883	-27.2482	8.82709	5.99795	-2.93 , 20.58	0.1411	-89.7264	33.162	33.6204	-32.73 , 99.06	0.324	-61.4037
cg15283950	11	MRVI1	N	87.6343	11.1143	65.85 , 109.42	3.15e-15	-11.207	20.4539	-51.3 , 28.88	0.5838	-112.788	7.22272	6.20878	-4.95 , 19.39	0.2447	-91.7581	-25.0754	19.5727	-63.44 , 13.29	0.2001	-128.614
cg18702935	13	SUCLA2	N	-94.587	12.0194	-118.15 , -71.03	3.56e-15	-9.0488	21.4384	-51.07 , 32.97	0.673	-90.4334	-3.53249	6.85994	-16.98 , 9.91	0.6066	-96.2654	-25.1089	33.8743	-91.5 , 41.28	0.4585	-73.4542
cg17353337	6	NHSL1	N	83.6651	10.6615	62.77 , 104.56	4.25e-15	-31.6557	30.7344	-91.9 , 28.58	0.303	-137.836	2.78083	32.1797	-60.29 , 65.85	0.9311	-96.6762	-36.7037	47.458	-129.72 , 56.31	0.4393	-143.87
cg15962969	6	NHSL1	N	88.7271	11.3077	66.56 , 110.89	4.28e-15	-54.9152	32.4296	-118.48 , 8.65	0.09039	-161.892	4.34738	14.0342	-23.16 , 31.85	0.7567	-95.1003	-6.22837	44.3174	-93.09 , 80.63	0.8882	-107.02
cg09695430	11	WT1	N	-74.8836	9.57069	-93.64 , -56.13	5.11e-15	-23.7232	17.0024	-57.05 , 9.6	0.1629	-68.3199	-4.11053	6.40314	-16.66 , 8.44	0.5209	-94.5108	11.9255	36.236	-59.1 , 82.95	0.7421	-115.925
cg00218409	2	SEMA4F	N	-131.629	16.8512	-164.66 , -98.6	5.66e-15	81.2509	38.6828	5.43 , 157.07	0.03569	-161.727	2.04401	7.59214	-12.84 , 16.92	0.7878	-101.553	45.781	60.9978	-73.77 , 165.34	0.4529	-134.78
cg25162533	17	METRNL	N	60.8758	7.80363	45.58 , 76.17	6.14e-15	16.0646	9.10698	-1.79 , 33.91	0.07773	-73.6108	4.54391	4.12087	-3.53 , 12.62	0.2702	-92.5358	-20.3119	29.027	-77.2 , 36.58	0.4841	-133.366
cg20219891	2	GLI2	Y	-23.4936	3.02638	-29.43 , -17.56	8.3e-15	-26.0301	5.32894	-36.47 , -15.59	1.036e-06	10.7967	-4.00018	1.97891	-7.88 , -0.12	0.04324	-82.9733	-34.0769	11.036	-55.71 , -12.45	0.002017	45.0478
cg00066351	7	LINC00996	N	-74.3706	9.58794	-93.16 , -55.58	8.72e-15	-9.97509	16.2342	-41.79 , 21.84	0.5389	-86.5873	-3.79035	6.12911	-15.8 , 8.22	0.5363	-94.9034	-25.3446	34.7924	-93.54 , 42.85	0.4663	-65.9212
cg00395063	11	ARHGEF12	N	105.994	13.6721	79.2 , 132.79	9e-15	-21.7086	31.5541	-83.55 , 40.14	0.4915	-120.481	1.7362	6.75237	-11.5 , 14.97	0.7971	-98.362	21.2461	44.9658	-66.89 , 109.38	0.6366	-79.9554
cg07807757	7	GRB10	N	-89.3213	11.5535	-111.97 , -66.68	1.07e-14	17.343	18.5163	-18.95 , 53.64	0.3489	-119.416	5.16618	8.09101	-10.69 , 21.02	0.5231	-105.784	1.59256	34.3636	-65.76 , 68.95	0.963	-101.783
cg09476997	16	SLC9A3R2	N	50.2933	6.51167	37.53 , 63.06	1.13e-14	-15.8346	15.3697	-45.96 , 14.29	0.3029	-131.485	2.53512	4.79637	-6.87 , 11.94	0.5971	-94.9593	-44.5059	36.0956	-115.25 , 26.24	0.2176	-188.493
cg07677157	12	RPSAP52	N	-47.8454	6.19789	-59.99 , -35.7	1.17e-14	-7.17585	11.8007	-30.31 , 15.95	0.5431	-85.002	2.84473	16.7502	-29.99 , 35.68	0.8651	-105.946	13.5962	21.7591	-29.05 , 56.24	0.5321	-128.417
cg05119988	4	MSMO1	N	-57.4884	7.46592	-72.12 , -42.86	1.36e-14	6.77161	12.2186	-17.18 , 30.72	0.5794	-111.779	-3.61157	4.62851	-12.68 , 5.46	0.4352	-93.7177	-10.6896	24.0536	-57.83 , 36.46	0.6567	-81.4056
cg07317017	15	LOXL1-AS1	N	94.9021	12.3287	70.74 , 119.07	1.39e-14	83.4554	24.8126	34.82 , 132.09	0.0007698	-12.0616	32.2887	26.615	-19.88 , 84.45	0.2251	-65.9768	51.3194	37.2604	-21.71 , 124.35	0.1684	-45.9239
cg09888330	1	SH2D2A	N	132.401	17.2341	98.62 , 166.18	1.56e-14	18.061	34.3359	-49.24 , 85.36	0.5989	-86.3589	-19.9423	10.4049	-40.34 , 0.45	0.05529	-115.062	64.5344	46.5933	-26.79 , 155.86	0.166	-51.2585
cg22246785	12	KDM2B	N	-82.1869	10.7011	-103.16 , -61.21	1.59e-14	-1.98795	19.9037	-41 , 37.02	0.9204	-97.5812	-0.6896	7.05086	-14.51 , 13.13	0.9221	-99.1609	-49.5885	34.394	-117 , 17.82	0.1494	-39.6638
cg14195992	8	SPIDR	N	102.733	13.3844	76.5 , 128.97	1.65e-14	21.9646	24.5733	-26.2 , 70.13	0.3714	-78.6196	-6.29292	7.84659	-21.67 , 9.09	0.4226	-106.126	57.3195	45.5287	-31.92 , 146.56	0.208	-44.2052
cg08108224	6	PRIM2	N	-83.4411	10.8918	-104.79 , -62.09	1.85e-14	4.47561	19.3367	-33.42 , 42.38	0.817	-105.364	13.4741	5.72608	2.25 , 24.7	0.01862	-116.148	-80.1564	37.5743	-153.8 , -6.51	0.0329	-3.93664
cg01400685	11	FADS2	N	-75.3564	9.85057	-94.66 , -56.05	2.01e-14	12.3086	15.2049	-17.49 , 42.11	0.4182	-116.334	2.84314	6.26347	-9.43 , 15.12	0.6499	-103.773	-4.70947	29.1916	-61.93 , 52.51	0.8718	-93.7504
cg26950531	19	DPF1	N	-54.2155	7.09091	-68.11 , -40.32	2.08e-14	-10.2088	15.546	-40.68 , 20.26	0.5114	-81.1699	-2.36548	2.92161	-8.09 , 3.36	0.4181	-95.6369	28.805	20.1146	-10.62 , 68.23	0.1521	-153.131
cg12594244	15	LOXL1-AS1	N	107.97	14.1281	80.28 , 135.66	2.14e-14	95.6292	28.9816	38.83 , 152.43	0.0009681	-11.4302	10.5961	7.19172	-3.5 , 24.69	0.1406	-90.1861	33.7093	42.5418	-49.67 , 117.09	0.4281	-68.7791
cg23494863	8	STAR	N	-89.5653	11.7256	-112.55 , -66.58	2.2e-14	11.2793	20.2006	-28.31 , 50.87	0.5766	-112.593	5.73837	5.52569	-5.09 , 16.57	0.299	-106.407	-20.4787	39.851	-98.59 , 57.63	0.6073	-77.1354
cg13742400	2	DOCK10	N	-88.784	11.6354	-111.59 , -65.98	2.34e-14	10.8033	24.9806	-38.16 , 59.77	0.6654	-112.168	7.30997	9.30896	-10.94 , 25.56	0.4323	-108.233	-9.0223	43.6668	-94.61 , 76.56	0.8363	-89.8379
cg13687834	10	PITRM1	N	-55.2256	7.24561	-69.43 , -41.02	2.5e-14	-20.6805	16.6691	-53.35 , 11.99	0.2147	-62.5527	-29.7874	27.7695	-84.22 , 24.64	0.2834	-46.0623	44.0469	27.5115	-9.88 , 97.97	0.1094	-179.758
cg23237276	14	MIR1247	N	62.9783	8.2871	46.74 , 79.22	2.97e-14	14.0476	14.3696	-14.12 , 42.21	0.3283	-77.6946	15.6228	6.21892	3.43 , 27.81	0.012	-75.1933	3.37706	33.0922	-61.48 , 68.24	0.9187	-94.6377
cg00153395	1	JAK1	N	81.0181	10.6679	60.11 , 101.93	3.09e-14	8.10902	21.3936	-33.82 , 50.04	0.7047	-89.9911	-12.048	7.44786	-26.65 , 2.55	0.1057	-114.871	-1.65203	44.5861	-89.04 , 85.74	0.9704	-102.039
cg12547807	1	SPSB1	N	-105.687	13.9753	-133.08 , -78.3	3.96e-14	50.5336	31.8884	-11.97 , 113.03	0.113	-147.814	11.9031	8.53455	-4.82 , 28.63	0.1631	-111.263	-19.1342	41.9225	-101.3 , 63.03	0.6481	-81.8954
cg10453071	16	DOK4	N	91.3475	12.1043	67.62 , 115.07	4.46e-14	12.7029	15.7811	-18.23 , 43.63	0.4209	-86.0938	-16.3907	5.16833	-26.52 , -6.26	0.001517	-117.943	-39.4289	28.8917	-96.06 , 17.2	0.1723	-143.164
cg02704502	11	H19	N	65.6009	8.7026	48.54 , 82.66	4.77e-14	14.4708	13.163	-11.33 , 40.27	0.2716	-77.9412	-2.05916	4.60957	-11.09 , 6.98	0.6551	-103.139	4.89734	21.802	-37.83 , 47.63	0.8223	-92.5346
cg00119811	5	ARHGEF28	N	-107.271	14.2383	-135.18 , -79.36	4.92e-14	-42.4261	38.8857	-118.64 , 33.79	0.2753	-60.4495	-2.45113	12.7778	-27.5 , 22.59	0.8479	-97.715	-38.5327	42.3994	-121.64 , 44.57	0.3635	-64.0791
cg18489994	4	C1QTNF7	N	-88.3138	11.7461	-111.34 , -65.29	5.54e-14	14.0402	36.1766	-56.87 , 84.95	0.6979	-115.898	-9.55225	12.1123	-33.29 , 14.19	0.4303	-89.1837	117.904	49.9294	20.04 , 215.77	0.01821	-233.506
cg24020157	10	RASGEF1A	N	-67.2128	8.95792	-84.77 , -49.66	6.23e-14	-22.593	21.349	-64.44 , 19.25	0.2899	-66.3859	-1.14567	5.45627	-11.84 , 9.55	0.8337	-98.2955	13.0264	29.2751	-44.35 , 70.41	0.6563	-119.381
cg23032421	3	IL5RA	N	-47.5459	6.34322	-59.98 , -35.11	6.6e-14	-0.81757	14.9608	-30.14 , 28.51	0.9564	-98.2805	0.82291	6.16476	-11.26 , 12.91	0.8938	-101.731	-20.9755	33.0453	-85.74 , 43.79	0.5256	-55.8838
cg05056497	21	RCAN1	N	-49.0508	6.54555	-61.88 , -36.22	6.69e-14	-5.51974	13.1729	-31.34 , 20.3	0.6752	-88.7469	-8.34366	4.37403	-16.92 , 0.23	0.05645	-82.9898	20.8518	22.6616	-23.56 , 65.27	0.3575	-142.511
cg26627956	2	CFLAR	N	86.9748	11.6347	64.17 , 109.78	7.7e-14	-48.371	40.6815	-128.11 , 31.36	0.2344	-155.615	11.0012	22.736	-33.56 , 55.56	0.6285	-87.3513	35.6538	158.979	-275.94 , 347.25	0.8225	-59.0067
cg07340025	5	ANKH	N	-55.5131	7.42737	-70.07 , -40.96	7.77e-14	-22.0305	14.8912	-51.22 , 7.16	0.139	-60.3147	3.43808	4.71281	-5.8 , 12.68	0.4657	-106.193	6.26481	18.7252	-30.44 , 42.97	0.738	-111.285
cg09915396	17	RAP1GAP2	N	-86.4974	11.5818	-109.2 , -63.8	8.12e-14	9.40596	28.5271	-46.51 , 65.32	0.7416	-110.874	-5.95988	6.86456	-19.41 , 7.49	0.3853	-93.1098	52.7184	49.8796	-45.05 , 150.48	0.2906	-160.948
cg25164589	10	C10orf107	N	-63.2983	8.49173	-79.94 , -46.65	9.05e-14	-1.42996	18.1098	-36.93 , 34.07	0.9371	-97.7409	7.70193	4.69118	-1.49 , 16.9	0.1006	-112.168	-28.7397	21.82	-71.51 , 14.03	0.1878	-54.5965
cg21516291	20	SLC35C2	N	96.6439	12.9672	71.23 , 122.06	9.13e-14	-20.575	24.4789	-68.55 , 27.4	0.4006	-121.29	1.38155	6.43944	-11.24 , 14	0.8301	-98.5705	10.4437	30.0924	-48.54 , 69.42	0.7285	-89.1936
cg14435807	15	LOXL1-AS1	N	102.493	13.814	75.42 , 129.57	1.18e-13	97.3568	27.2162	44.01 , 150.7	0.0003473	-5.01147	5.1226	6.10006	-6.83 , 17.08	0.401	-95.002	70.0117	39.8327	-8.06 , 148.08	0.07881	-31.6913
cg14292823	8	TIGD5	N	117.071	15.8124	86.08 , 148.06	1.32e-13	65.5991	31.3878	4.08 , 127.12	0.03662	-43.9665	9.8614	10.5155	-10.75 , 30.47	0.3483	-91.5766	-34.0577	43.1936	-118.72 , 50.6	0.4304	-129.092
cg21805179	12	MPHOSPH9	N	55.8209	7.57966	40.96 , 70.68	1.78e-13	-34.6338	15.2567	-64.54 , -4.73	0.0232	-162.044	17.6578	19.3677	-20.3 , 55.62	0.3619	-68.3671	29.8263	20.7166	-10.78 , 70.43	0.1499	-46.5679
cg22908922	14	PACS2	N	79.5882	10.8166	58.39 , 100.79	1.87e-13	-11.3438	22.9445	-56.31 , 33.63	0.621	-114.253	-2.75859	7.99429	-18.43 , 12.91	0.73	-103.466	0.65362	54.5384	-106.24 , 107.55	0.9904	-99.1787
cg05779272	9	B4GALT1	N	135.717	18.4611	99.53 , 171.9	1.96e-13	-42.9745	37.4836	-116.44 , 30.49	0.2516	-131.665	-12.8275	10.6785	-33.76 , 8.1	0.2297	-109.452	23.7554	53.0334	-80.19 , 127.7	0.6542	-82.4964
cg14548802	9	COL5A1	N	61.2361	8.33917	44.89 , 77.58	2.09e-13	2.94095	14.9502	-26.36 , 32.24	0.844	-95.1974	-18.7514	16.1679	-50.44 , 12.94	0.2461	-130.621	-17.394	20.7938	-58.15 , 23.36	0.4029	-128.405
cg12036877	1	PMF1-BGLAP	N	67.6848	9.25534	49.54 , 85.83	2.61e-13	-14.2804	19.8703	-53.23 , 24.67	0.4723	-121.098	3.16818	6.56431	-9.7 , 16.03	0.6294	-95.3192	25.0579	23.6458	-21.29 , 71.4	0.2893	-62.9785
cg17442852	17	SLC43A2	N	59.4537	8.1399	43.5 , 75.41	2.79e-13	28.26	16.4248	-3.93 , 60.45	0.08533	-52.4672	-0.1374	6.11655	-12.13 , 11.85	0.9821	-100.231	15.8038	33.9492	-50.74 , 82.34	0.6416	-73.4183
cg12804755	11	SOX6	N	-51.8977	7.10603	-65.83 , -37.97	2.81e-13	2.9467	19.6913	-35.65 , 41.54	0.881	-105.678	-2.50898	9.38287	-20.9 , 15.88	0.7892	-95.1655	38.4057	39.0155	-38.06 , 114.88	0.3249	-174.003
cg00942920	1	LAX1	N	-59.1074	8.09499	-74.97 , -43.24	2.84e-13	9.78687	18.8373	-27.13 , 46.71	0.6034	-116.558	4.47208	3.74083	-2.86 , 11.8	0.2319	-107.566	-6.35985	27.7491	-60.75 , 48.03	0.8187	-89.2402
cg01063280	6	SEC63	N	-82.3449	11.289	-104.47 , -60.22	3e-13	3.6635	18.1372	-31.89 , 39.21	0.8399	-104.449	-15.6562	6.33083	-28.06 , -3.25	0.0134	-80.9871	33.0658	35.7018	-36.91 , 103.04	0.3544	-140.155
cg01815912	16	NTHL1	N	90.1693	12.3641	65.94 , 114.4	3.04e-13	-2.51275	19.9236	-41.56 , 36.54	0.8996	-102.787	-19.8937	7.53271	-34.66 , -5.13	0.008267	-122.063	1.14868	55.7108	-108.04 , 110.34	0.9835	-98.7261
cg03996020	7	DNAJB6	N	52.2346	7.16591	38.19 , 66.28	3.12e-13	15.4251	10.9661	-6.07 , 36.92	0.1595	-70.4696	-3.52445	4.67536	-12.69 , 5.64	0.4509	-106.747	30.66	20.2681	-9.07 , 70.39	0.1304	-41.3032
cg00329157	3	C3orf52	N	-102.897	14.1332	-130.6 , -75.2	3.33e-13	28.1496	22.3862	-15.73 , 72.03	0.2086	-127.357	-2.08041	9.35107	-20.41 , 16.25	0.8239	-97.9782	74.0922	39.5815	-3.49 , 151.67	0.06122	-172.006
cg04479212	3	ITGA9	N	70.3144	9.66822	51.36 , 89.26	3.52e-13	-20.5183	13.2026	-46.4 , 5.36	0.1202	-129.181	25.0379	15.1263	-4.61 , 54.69	0.09787	-64.3915	-3.11771	20.8269	-43.94 , 37.7	0.881	-104.434
cg17142950	1	SAMD13	N	-61.9082	8.54081	-78.65 , -45.17	4.21e-13	-25.329	16.5577	-57.78 , 7.12	0.1261	-59.0861	10.7986	5.3406	0.33 , 21.27	0.04318	-117.443	42.1652	26.9144	-10.59 , 94.92	0.1172	-168.109
cg18536994	17	TMEM235	N	79.8479	11.0374	58.21 , 101.48	4.68e-13	-15.7539	20.7274	-56.38 , 24.87	0.4472	-119.73	-16.5912	8.24458	-32.75 , -0.43	0.04418	-120.779	-51.1135	57.8906	-164.58 , 62.35	0.3773	-164.014
cg07105221	7	RADIL	N	52.2097	7.22356	38.05 , 66.37	4.91e-13	20.0641	11.3778	-2.24 , 42.36	0.07783	-61.5701	5.25008	5.25855	-5.06 , 15.56	0.3181	-89.9442	77.5828	27.3941	23.89 , 131.28	0.004624	48.5985
cg02573176	8	SLC10A5	N	-60.2995	8.34556	-76.66 , -43.94	5e-13	-24.0165	19.0487	-61.35 , 13.32	0.2074	-60.1713	-0.9036	4.99254	-10.69 , 8.88	0.8564	-98.5015	-6.45336	31.1061	-67.42 , 54.51	0.8356	-89.2978
cg04246167	3	C3orf67	N	-71.9895	9.96407	-91.52 , -52.46	5.01e-13	40.7005	17.8057	5.8 , 75.6	0.02227	-156.537	-1.11619	8.00131	-16.8 , 14.57	0.8891	-98.4495	11.2161	34.4393	-56.28 , 78.72	0.7447	-115.58
cg18584067	2	SERTAD2	N	-76.6542	10.6234	-97.48 , -55.83	5.37e-13	42.9341	28.5514	-13.03 , 98.89	0.1326	-156.01	-9.96494	6.50487	-22.71 , 2.78	0.1255	-87.0001	-67.2117	40.0874	-145.78 , 11.36	0.09361	-12.3183
cg08447200	22	PANX2	N	54.4916	7.57343	39.65 , 69.34	6.24e-13	-11.3234	8.4285	-27.84 , 5.2	0.1791	-120.78	6.41734	4.59915	-2.6 , 15.43	0.1629	-88.2232	-98.7509	50.9776	-198.67 , 1.17	0.05273	-281.222
cg02402882	5	GPBP1	N	-80.3123	11.1641	-102.19 , -58.43	6.3e-13	34.8604	20.8901	-6.08 , 75.8	0.09517	-143.406	5.24446	8.00894	-10.45 , 20.94	0.5126	-106.53	36.6127	46.3566	-54.25 , 127.47	0.4296	-145.588
cg06500792	2	LOC400958	N	-74.7928	10.4089	-95.19 , -54.39	6.7e-13	-0.73818	16.6313	-33.34 , 31.86	0.9646	-99.013	-3.76997	4.47494	-12.54 , 5	0.3995	-94.9594	1.32036	32.2023	-61.8 , 64.44	0.9673	-101.765
cg05575921	5	AHRR	N	79.0348	11.0066	57.46 , 100.61	6.94e-13	41.1936	24.9923	-7.79 , 90.18	0.0993	-47.8792	13.6568	10.719	-7.35 , 34.67	0.2026	-82.7205	-0.02823	10.8434	-21.28 , 21.22	0.9979	-100.036
cg09321238	1	PRDM16	N	118.503	16.6006	85.97 , 151.04	9.44e-13	-25.0069	38.1803	-99.84 , 49.83	0.5125	-121.102	4.17368	8.33082	-12.15 , 20.5	0.6164	-96.478	30.1689	52.2035	-72.15 , 132.49	0.5633	-74.5416
cg12750675	7	BRAF	N	-67.9873	9.52782	-86.66 , -49.31	9.63e-13	-31.42	15.4632	-61.73 , -1.11	0.04216	-53.7855	-5.61107	16.5268	-38 , 26.78	0.7342	-91.7469	2.02795	31.2982	-59.32 , 63.37	0.9483	-102.983
cg13872898	2	GLI2	N	-25.5947	3.58791	-32.63 , -18.56	9.78e-13	-25.6488	5.82675	-37.07 , -14.23	1.073e-05	0.211607	-4.35966	2.22781	-8.73 , 0.01	0.05036	-82.9665	-46.3683	15.1585	-76.08 , -16.66	0.002222	81.1642
cg22347642	8	GINS4	N	-82.3912	11.5534	-105.04 , -59.75	9.94e-13	1.66007	27.6751	-52.58 , 55.9	0.9522	-102.015	-39.9503	37.2697	-113 , 33.1	0.2838	-51.5114	47.3843	34.8694	-20.96 , 115.73	0.1742	-157.511
cg26750893	2	RMDN2	N	-59.8864	8.40705	-76.36 , -43.41	1.05e-12	5.87673	17.7054	-28.83 , 40.58	0.74	-109.813	-23.0646	15.9575	-54.34 , 8.21	0.1484	-61.4861	56.3004	36.5395	-15.32 , 127.92	0.1234	-194.012
cg12259522	13	TEX29	N	99.2244	13.9516	71.88 , 126.57	1.14e-12	23.3117	19.8381	-15.57 , 62.19	0.24	-76.5061	-2.70085	6.64596	-15.73 , 10.33	0.6845	-102.722	43.0188	38.6491	-32.73 , 118.77	0.2657	-56.6449
cg13740339	9	FBP1	N	-89.3667	12.5659	-114 , -64.74	1.15e-12	45.1189	28.3135	-10.38 , 100.61	0.111	-150.487	5.12895	6.5689	-7.75 , 18	0.4349	-105.739	-6.34096	45.6689	-95.85 , 83.17	0.8896	-92.9046
cg19242268	20	TCEA2	N	95.8158	13.4765	69.4 , 122.23	1.16e-12	34.9829	26.1892	-16.35 , 86.31	0.1816	-63.4894	6.4906	6.86928	-6.97 , 19.95	0.3447	-93.226	4.09765	32.1886	-58.99 , 67.19	0.8987	-95.7234
cg20449670	1	S100A6	N	-66.6807	9.38793	-85.08 , -48.28	1.22e-12	-7.69599	13.6538	-34.46 , 19.07	0.573	-88.4584	-4.63766	4.06033	-12.6 , 3.32	0.2534	-93.045	-15.3598	24.0979	-62.59 , 31.87	0.5239	-76.9651
cg00162064	1	RNF220	N	-61.835	8.72485	-78.94 , -44.73	1.37e-12	-3.63595	21.9361	-46.63 , 39.36	0.8684	-94.1199	3.42198	4.76793	-5.92 , 12.77	0.4729	-105.534	-26.008	33.0548	-90.8 , 38.78	0.4314	-57.9397
cg07168232	1	LAMB3	N	-71.2443	10.0578	-90.96 , -51.53	1.41e-12	32.3916	20.256	-7.31 , 72.09	0.1098	-145.465	-6.49859	8.81409	-23.77 , 10.78	0.4609	-90.8784	20.9016	44.8168	-66.94 , 108.74	0.6409	-129.338
cg19843457	12	SFSWAP	N	-55.0722	7.77541	-70.31 , -39.83	1.41e-12	-11.8624	21.7723	-54.54 , 30.81	0.5859	-78.4602	54.2523	32.7195	-9.88 , 118.38	0.0973	-198.511	-8.29807	30.3132	-67.71 , 51.12	0.7843	-84.9324
cg25324164	11	FADS2	N	-86.8938	12.297	-111 , -62.79	1.59e-12	41.2052	23.7265	-5.3 , 87.71	0.08244	-147.42	0.75945	4.09354	-7.26 , 8.78	0.8528	-100.874	0.96496	34.2543	-66.17 , 68.1	0.9775	-101.111
cg20717932	17	THRA	N	-69.3777	9.82135	-88.63 , -50.13	1.62e-12	17.4262	27.5296	-36.53 , 71.38	0.5267	-125.118	15.278	46.2378	-75.35 , 105.9	0.7411	-122.022	-20.0962	41.7072	-101.84 , 61.65	0.6299	-71.0337
cg03527802	16	BOLA2	N	88.7438	12.5656	64.12 , 113.37	1.64e-12	5.85762	26.1548	-45.41 , 57.12	0.8228	-93.3994	-1.3416	8.94514	-18.87 , 16.19	0.8808	-101.512	-66.3733	36.5325	-137.98 , 5.23	0.06924	-174.792
cg05851442	7	HOXA3	N	55.4971	7.85926	40.09 , 70.9	1.65e-12	-5.99182	17.869	-41.01 , 29.03	0.7374	-110.797	-1.46741	7.76798	-16.69 , 13.76	0.8502	-102.644	-21.641	77.0063	-172.57 , 129.29	0.7787	-138.995
cg26894079	11	CLMP	N	-71.4231	10.1202	-91.26 , -51.59	1.7e-12	32.7869	15.6302	2.15 , 63.42	0.03593	-145.905	4.3962	4.86362	-5.14 , 13.93	0.3661	-106.155	-16.8802	29.3756	-74.46 , 40.7	0.5655	-76.3659
cg05135499	10	SKIDA1	N	44.9464	6.39674	32.41 , 57.48	2.12e-12	4.96204	11.5026	-17.58 , 27.51	0.6662	-88.9601	7.75929	6.94008	-5.84 , 21.36	0.2635	-82.7366	24.8309	72.38	-117.03 , 166.7	0.7316	-44.7545
cg00637745	2	GLI2	Y	-20.9489	2.98345	-26.8 , -15.1	2.19e-12	-29.6207	5.41587	-40.24 , -19.01	4.519e-08	41.3952	-3.5789	1.77214	-7.05 , -0.11	0.04343	-82.916	-30.5566	9.80002	-49.76 , -11.35	0.001821	45.8626
cg27246744	3	OSBPL10	N	-84.6365	12.0573	-108.27 , -61	2.23e-12	21.9154	31.5402	-39.9 , 83.73	0.4872	-125.894	10.3714	9.52203	-8.29 , 29.03	0.2761	-112.254	10.1393	57.9025	-103.35 , 123.63	0.861	-111.98
cg03753191	13	EPSTI1	N	-91.523	13.0597	-117.12 , -65.93	2.42e-12	1.34499	23.5079	-44.73 , 47.42	0.9544	-101.47	20.1625	38.7802	-55.85 , 96.17	0.6031	-122.03	-12.9463	36.4285	-84.35 , 58.45	0.7223	-85.8546
cg14722693	8	CSGALNACT1	N	-78.3362	11.192	-100.27 , -56.4	2.57e-12	-8.75686	18.7475	-45.5 , 27.99	0.6404	-88.8214	10.9442	6.79834	-2.38 , 24.27	0.1074	-113.971	20.9919	35.6043	-48.79 , 90.78	0.5555	-126.797
cg07313882	17	TMC6	N	106.635	15.2382	76.77 , 136.5	2.6e-12	26.1817	33.7793	-40.03 , 92.39	0.4383	-75.4474	2.88812	7.7784	-12.36 , 18.13	0.7104	-97.2916	38.1952	49.5418	-58.91 , 135.3	0.4407	-64.1814
cg22242842	2	KCMF1	N	-70.5069	10.0852	-90.27 , -50.74	2.73e-12	10.5357	16.5495	-21.9 , 42.97	0.5244	-114.943	5.39738	6.99206	-8.31 , 19.1	0.4402	-107.655	-2.39703	32.8457	-66.77 , 61.98	0.9418	-96.6003
cg17711527	1	LAX1	N	-63.6757	9.11496	-81.54 , -45.81	2.83e-12	-44.8574	22.5236	-89 , -0.71	0.04642	-29.5534	0.76903	5.98538	-10.96 , 12.5	0.8978	-101.208	-34.9971	30.2532	-94.29 , 24.3	0.2474	-45.0385
cg02462416	11	H19	N	50.4739	7.22519	36.31 , 64.64	2.83e-12	12.2896	10.5773	-8.44 , 33.02	0.2453	-75.6516	-1.45383	3.90644	-9.11 , 6.2	0.7098	-102.88	3.99505	18.5048	-32.27 , 40.26	0.8291	-92.0849
cg17870997	2	GLI2	Y	-36.9896	5.30138	-47.38 , -26.6	3.01e-12	-31.2371	6.54981	-44.07 , -18.4	1.85e-06	-15.5519	-6.86059	2.62896	-12.01 , -1.71	0.009064	-81.4527	-42.5838	13.5416	-69.13 , -16.04	0.001663	15.1236
cg04070976	17	LLGL2	N	77.2095	11.0795	55.49 , 98.93	3.2e-12	22.9976	20.3807	-16.95 , 62.94	0.2591	-70.214	0.91391	4.99006	-8.87 , 10.69	0.8547	-98.8163	31.5492	33.8512	-34.8 , 97.9	0.3513	-59.1381
cg20664313	12	FBRSL1	N	78.3117	11.2549	56.25 , 100.37	3.45e-12	26.4445	19.8709	-12.5 , 65.39	0.1833	-66.2317	9.6486	11.4123	-12.72 , 32.02	0.3979	-87.6792	-82.6997	43.0821	-167.14 , 1.74	0.05491	-205.603
cg03254465	1	PRDM16	N	53.7225	7.72096	38.59 , 68.86	3.45e-12	-12.5796	19.0326	-49.88 , 24.72	0.5086	-123.416	6.00849	6.1555	-6.06 , 18.07	0.329	-88.8157	35.5768	31.3902	-25.95 , 97.1	0.2571	-33.7768
cg23975840	12	MAP1LC3B2	N	-51.5532	7.41473	-66.09 , -37.02	3.58e-12	3.71412	13.6889	-23.12 , 30.54	0.7861	-107.204	-0.45694	4.68518	-9.64 , 8.73	0.9223	-99.1137	-55.1956	26.6267	-107.38 , -3.01	0.03818	7.0654
cg00382138	4	CFI	N	-51.8281	7.46112	-66.45 , -37.2	3.75e-12	11.6983	12.8008	-13.39 , 36.79	0.3608	-122.571	-4.41935	15.4933	-34.79 , 25.95	0.7755	-91.4731	8.13538	20.4521	-31.95 , 48.22	0.6908	-115.697
cg17344906	19	NFIX	N	64.0446	9.22442	45.96 , 82.12	3.84e-12	1.2646	15.4531	-29.02 , 31.55	0.9348	-98.0254	64.6639	21.5532	22.42 , 106.91	0.002698	0.96692	-0.78805	22.8558	-45.59 , 44.01	0.9725	-101.23
cg11950754	1	LRP8	N	74.6701	10.7721	53.56 , 95.78	4.16e-12	-7.88333	21.651	-50.32 , 34.55	0.7158	-110.558	-5.76014	7.96572	-21.37 , 9.85	0.4696	-107.714	-2.64976	41.4863	-83.96 , 78.66	0.9491	-103.549
cg24058805	1	PDE4B	N	-123.97	17.8943	-159.04 , -88.9	4.27e-12	21.6817	21.3475	-20.16 , 63.52	0.3098	-117.489	-7.1113	8.62747	-24.02 , 9.8	0.4098	-94.2637	28.15	56.2646	-82.13 , 138.43	0.6169	-122.707
cg22057874	2	OSBPL6	N	-61.9557	8.95309	-79.5 , -44.41	4.52e-12	-5.43721	20.8809	-46.36 , 35.49	0.7946	-91.224	1.57632	5.17843	-8.57 , 11.73	0.7608	-102.544	-35.6205	36.4678	-107.1 , 35.86	0.3287	-42.5065
cg19448816	3	PLCL2	N	-67.6604	9.78254	-86.83 , -48.49	4.63e-12	-11.9653	10.935	-33.4 , 9.47	0.2739	-82.3156	2.30619	3.83731	-5.21 , 9.83	0.5478	-103.408	4.49516	17.3078	-29.43 , 38.42	0.7951	-106.644
cg04904815	6	UNC5CL	N	-108.591	15.7138	-139.39 , -77.79	4.83e-12	12.2835	32.3148	-51.05 , 75.62	0.7039	-111.312	-25.9933	34.9886	-94.57 , 42.58	0.4575	-76.0632	-49.9927	42.1897	-132.68 , 32.7	0.236	-53.9625
cg15171911	18	TCF4	N	58.791	8.50782	42.12 , 75.47	4.84e-12	22.31	12.6366	-2.46 , 47.08	0.07748	-62.0521	7.58729	5.42352	-3.04 , 18.22	0.1618	-87.0945	18.5985	20.5904	-21.76 , 58.96	0.3664	-68.365
cg23661483	19	ILVBL	N	80.0618	11.5987	57.33 , 102.8	5.1e-12	-26.4573	23.0515	-71.64 , 18.72	0.2511	-133.046	-7.53608	5.21606	-17.76 , 2.69	0.1485	-109.413	-3.98448	32.3424	-67.38 , 59.41	0.902	-104.977
cg27168858	1	DHCR24	N	-71.3069	10.331	-91.56 , -51.06	5.12e-12	-4.95226	11.4147	-27.33 , 17.42	0.6644	-93.055	-5.24123	5.71295	-16.44 , 5.96	0.3589	-92.6498	21.6865	27.4563	-32.13 , 75.5	0.4296	-130.413
cg08420923	16	ANKRD11	N	64.0575	9.28107	45.87 , 82.25	5.13e-12	-28.6009	22.388	-72.48 , 15.28	0.2014	-144.649	9.43309	8.05605	-6.36 , 25.22	0.2416	-85.274	-56.0538	48.059	-150.25 , 38.14	0.2435	-187.505
cg18334681	6	ENPP3	N	-75.306	10.9262	-96.72 , -53.89	5.49e-12	-30.9674	25.5079	-80.96 , 19.03	0.2247	-58.8779	-5.38986	7.83098	-20.74 , 9.96	0.4913	-92.8427	31.873	35.4273	-37.56 , 101.31	0.3683	-142.325
cg23147227	12	PTPN6	N	132.66	19.2481	94.93 , 170.39	5.5e-12	40.1884	27.4967	-13.71 , 94.08	0.1439	-69.7056	101.245	75.7048	-47.14 , 249.63	0.1811	-23.6807	62.5378	71.3666	-77.34 , 202.42	0.3809	-52.8584
cg01585860	6	COL12A1	N	-75.5443	10.9631	-97.03 , -54.06	5.55e-12	42.8271	42.8383	-41.14 , 126.79	0.3174	-156.691	146.727	71.4604	6.66 , 286.79	0.04005	-294.226	36.4127	68.4774	-97.8 , 170.63	0.5949	-148.2
cg01966974	1	BATF3	N	-60.6614	8.81613	-77.94 , -43.38	5.96e-12	57.4555	20.0955	18.07 , 96.84	0.004248	-194.715	-3.04097	33.6791	-69.05 , 62.97	0.9281	-94.987	4.18305	38.7945	-71.85 , 80.22	0.9141	-106.896
cg24395117	11	CTTN	N	65.036	9.45553	46.5 , 83.57	6.07e-12	14.2927	13.5552	-12.28 , 40.86	0.2917	-78.0233	0.42523	6.86912	-13.04 , 13.89	0.9506	-99.3462	-3.49875	26.2515	-54.95 , 47.95	0.894	-105.38
cg17924072	19	HMHA1	N	-58.9472	8.58495	-75.77 , -42.12	6.59e-12	-70.3611	65.3965	-198.54 , 57.82	0.282	19.3629	87.7775	103.574	-115.23 , 290.78	0.3967	-248.909	31.4935	114.196	-192.33 , 255.32	0.7827	-153.427
cg07133097	2	GLI2	N	-29.1985	4.25795	-37.54 , -20.85	7.01e-12	-36.4498	8.9691	-54.03 , -18.87	4.825e-05	24.8346	-7.5357	4.37773	-16.12 , 1.04	0.08518	-74.1915	-90.5808	28.2631	-145.98 , -35.19	0.001351	210.224
cg12419863	6	PLAGL1	N	-69.7861	10.1841	-89.75 , -49.83	7.26e-12	18.4126	17.7394	-16.36 , 53.18	0.2993	-126.384	1.88433	4.42211	-6.78 , 10.55	0.67	-102.7	22.5807	34.0173	-44.09 , 89.25	0.5068	-132.357
cg02283735	1	PTPRF	N	-55.7028	8.13352	-71.64 , -39.76	7.46e-12	-9.53812	13.0747	-35.16 , 16.09	0.4657	-82.8768	-0.52634	4.57991	-9.5 , 8.45	0.9085	-99.0551	-33.2259	19.9433	-72.31 , 5.86	0.09571	-40.3515
cg02855778	7	PTPRN2	N	76.8443	11.2292	54.83 , 98.85	7.74e-12	18.144	23.4731	-27.86 , 64.15	0.4395	-76.3886	-7.55977	7.12341	-21.52 , 6.4	0.2886	-109.838	-45.5532	36.8775	-117.83 , 26.73	0.2167	-159.28
cg23719157	15	STRA6	N	44.6003	6.52023	31.82 , 57.38	7.9e-12	-6.90571	19.0556	-44.25 , 30.44	0.7171	-115.484	-10.3419	23.0272	-55.48 , 34.79	0.6533	-123.188	-5.28265	42.4519	-88.49 , 77.92	0.901	-111.844
cg14177925	14	OR4E2	N	-75.0117	10.97	-96.51 , -53.51	8.04e-12	45.1093	25.6583	-5.18 , 95.4	0.07873	-160.136	10.8774	6.17326	-1.22 , 22.98	0.07807	-114.501	-30.555	37.0847	-103.24 , 42.13	0.41	-59.2664
cg15806306	11	KCNQ1DN	N	-82.7606	12.1293	-106.53 , -58.99	8.91e-12	48.3262	22.1018	5.01 , 91.65	0.02878	-158.393	6.02531	6.1745	-6.08 , 18.13	0.3291	-107.28	-34.5361	31.8638	-96.99 , 27.92	0.2784	-58.2698
cg14311362	2	GLI2	Y	-42.7697	6.26925	-55.06 , -30.48	8.97e-12	-38.06	8.74111	-55.19 , -20.93	1.336e-05	-11.0118	-5.16296	2.27249	-9.62 , -0.71	0.02309	-87.9285	-46.8487	13.7189	-73.74 , -19.96	0.000638	9.53705
cg04206967	8	TRHR	N	60.2087	8.82792	42.91 , 77.51	9.09e-12	-14.5049	23.9449	-61.44 , 32.43	0.5447	-124.091	-9.59057	9.28952	-27.8 , 8.62	0.3019	-115.929	-30.0432	44.8721	-117.99 , 57.91	0.5032	-149.898
cg01741041	7	ACTB	N	110.587	16.2449	78.75 , 142.43	9.93e-12	26.3075	34.0098	-40.35 , 92.97	0.4392	-76.2111	14.618	6.06413	2.73 , 26.5	0.01593	-86.7815	-32.6636	54.874	-140.22 , 74.89	0.5517	-129.537
cg21707172	6	TIAM2	N	53.5425	7.86612	38.12 , 68.96	9.99e-12	13.4966	12.9925	-11.97 , 38.96	0.2989	-74.7928	7.098	3.85279	-0.45 , 14.65	0.06543	-86.7432	13.6702	19.5545	-24.66 , 52	0.4845	-74.4685
cg16875057	2	STK39	N	-67.5687	9.93373	-87.04 , -48.1	1.03e-11	0.80761	20.1004	-38.59 , 40.2	0.968	-101.195	-0.46332	7.30992	-14.79 , 13.86	0.9495	-99.3143	-20.2392	30.5693	-80.16 , 39.68	0.5079	-70.0465
cg10735015	6	PHACTR2	N	-41.5024	6.10495	-53.47 , -29.54	1.06e-11	-5.9054	11.4661	-28.38 , 16.57	0.6065	-85.771	-5.56953	15.6573	-36.26 , 25.12	0.7221	-86.5802	-24.1651	20.3549	-64.06 , 15.73	0.2352	-41.7744
cg05191655	4	TBC1D1	N	-84.5146	12.4526	-108.92 , -60.11	1.15e-11	74.0323	29.3351	16.54 , 131.53	0.01161	-187.597	1.4558	5.68443	-9.69 , 12.6	0.7979	-101.723	-39.5592	37.0829	-112.24 , 33.12	0.2861	-53.1924
cg06478823	16	ACSM3	N	-45.479	6.70378	-58.62 , -32.34	1.17e-11	25.7305	13.5443	-0.82 , 52.28	0.05747	-156.577	2.50824	3.83102	-5 , 10.02	0.5126	-105.515	-8.04302	30.0531	-66.95 , 50.86	0.789	-82.3149
cg01906801	17	MED24	N	73.906	10.9642	52.42 , 95.4	1.58e-11	-6.23921	21.506	-48.39 , 35.91	0.7717	-108.442	-5.37055	7.13424	-19.35 , 8.61	0.4516	-107.267	-42.63	52.5565	-145.64 , 60.38	0.4173	-157.681
cg20102045	13	MYO16	N	51.0796	7.58608	36.21 , 65.95	1.66e-11	-18.1725	15.8598	-49.26 , 12.91	0.2519	-135.577	0.33899	6.299	-12.01 , 12.69	0.9571	-99.3363	33.5574	34.9906	-35.02 , 102.14	0.3375	-34.3037
cg16165575	1	RPE65	N	-51.1639	7.60376	-66.07 , -36.26	1.71e-11	-3.32463	22.4975	-47.42 , 40.77	0.8825	-93.502	2.32902	7.24001	-11.86 , 16.52	0.7477	-104.552	44.8496	36.3454	-26.39 , 116.09	0.2172	-187.659
cg14731462	10	PTPRE	N	-64.5694	9.60429	-83.39 , -45.74	1.78e-11	14.4977	12.4148	-9.84 , 38.83	0.2429	-122.453	1.99645	3.85438	-5.56 , 9.55	0.6045	-103.092	-25.2774	23.6502	-71.63 , 21.08	0.2852	-60.8523
cg26995690	13	MIR548F5	Y	-48.7114	7.25281	-62.93 , -34.5	1.87e-11	-65.0802	13.4428	-91.43 , -38.73	1.29e-06	33.6036	-17.6209	6.4598	-30.28 , -4.96	0.006376	-63.8259	-55.0497	26.8101	-107.6 , -2.5	0.04004	13.0119
cg03445287	8	XPO7	N	-79.5044	11.8402	-102.71 , -56.3	1.88e-11	18.5303	25.2003	-30.86 , 67.92	0.4621	-123.307	-24.9706	35.659	-94.86 , 44.92	0.4838	-68.5921	-28.4069	35.6581	-98.3 , 41.48	0.4257	-64.27
cg07638500	3	MYLK	N	78.244	11.6582	55.39 , 101.09	1.93e-11	-32.6571	29.9422	-91.34 , 26.03	0.2754	-141.737	-7.0762	11.5352	-29.69 , 15.53	0.5396	-109.044	18.7894	45.9742	-71.32 , 108.9	0.6828	-75.9862
cg10181414	19	GNG7	N	54.1712	8.0741	38.35 , 70	1.96e-11	12.8944	12.5101	-11.63 , 37.41	0.3027	-76.1969	43.145	13.0145	17.64 , 68.65	0.000916	-20.3544	6.15973	15.7395	-24.69 , 37.01	0.6955	-88.6291
cg02449762	10	ASB13	N	57.8862	8.63183	40.97 , 74.8	2e-11	40.576	17.5484	6.18 , 74.97	0.02076	-29.9038	-3.57821	6.71515	-16.74 , 9.58	0.5941	-106.181	-34.8052	33.9929	-101.43 , 31.82	0.3059	-160.127
cg25199005	1	SMYD3	N	-74.8468	11.1645	-96.73 , -52.96	2.03e-11	-8.26305	21.849	-51.09 , 34.56	0.7053	-88.96	-6.76249	6.40577	-19.32 , 5.79	0.2911	-90.9649	-27.4423	38.2715	-102.45 , 47.57	0.4733	-63.3354
cg24013213	13	GUCY1B2	N	-42.7487	6.38338	-55.26 , -30.24	2.13e-11	29.5668	23.1627	-15.83 , 74.97	0.2018	-169.164	-0.33179	7.66703	-15.36 , 14.7	0.9655	-99.2239	0.11173	34.3372	-67.19 , 67.41	0.9974	-100.261
cg11077681	11	MRVI1	N	87.7728	13.1177	62.06 , 113.48	2.21e-11	-7.66427	22.5946	-51.95 , 36.62	0.7345	-108.732	23.6695	22.8744	-21.16 , 68.5	0.3008	-73.0332	13.9674	33.5974	-51.88 , 79.82	0.6776	-84.0868
cg14242936	12	GRASP	N	53.5165	7.99906	37.84 , 69.19	2.23e-11	35.0305	14.782	6.06 , 64	0.0178	-34.5425	5.96206	5.00534	-3.85 , 15.77	0.2336	-88.8594	5.4719	37.6495	-68.32 , 79.26	0.8844	-89.7753
cg15013617	20	TMEM239	N	-49.7258	7.43605	-64.3 , -35.15	2.28e-11	-8.1437	20.323	-47.98 , 31.69	0.6886	-83.6228	7.80723	4.30057	-0.62 , 16.24	0.06946	-115.701	-37.961	32.6031	-101.86 , 25.94	0.2443	-23.6594
cg26889659	6	EXOC2	N	26.6671	3.98946	18.85 , 34.49	2.32e-11	11.7445	6.13227	-0.27 , 23.76	0.05547	-55.9588	0.52532	1.97855	-3.35 , 4.4	0.7906	-98.0301	0.2782	12.6911	-24.6 , 25.15	0.9825	-98.9568
cg16000331	22	SREBF2	N	-103.176	15.445	-133.45 , -72.9	2.39e-11	34.112	31.1902	-27.02 , 95.24	0.2741	-133.062	5.58933	5.75808	-5.7 , 16.88	0.3317	-105.417	-36.0788	46.0866	-126.41 , 54.25	0.4337	-65.0318
cg24821554	13	GUCY1B2	N	-48.5836	7.27484	-62.84 , -34.32	2.42e-11	25.6057	20.9276	-15.41 , 66.62	0.2211	-152.704	1.63421	5.76528	-9.67 , 12.93	0.7768	-103.364	6.46789	40.685	-73.27 , 86.21	0.8737	-113.313
cg07443710	10	TSPAN15	N	-68.9494	10.3303	-89.2 , -48.7	2.48e-11	-18.5731	19.0075	-55.83 , 18.68	0.3285	-73.0626	-0.86152	6.55614	-13.71 , 11.99	0.8955	-98.7505	-12.4474	34.2148	-79.51 , 54.61	0.716	-81.9471
cg21121843	4	HTT	N	-51.0901	7.65939	-66.1 , -36.08	2.55e-11	21.4514	16.509	-10.91 , 53.81	0.1938	-141.987	0.85482	3.92734	-6.84 , 8.55	0.8277	-101.673	-34.9737	25.6592	-85.27 , 15.32	0.1729	-31.5451
cg26884581	11	PYGM	N	88.347	13.2613	62.35 , 114.34	2.7e-11	36.6878	22.0873	-6.6 , 79.98	0.09671	-58.4731	-22.6541	10.2566	-42.76 , -2.55	0.02719	-125.642	-29.849	55.8775	-139.37 , 79.67	0.5932	-133.786
cg10421188	7	CREB5	N	-74.8276	11.2497	-96.88 , -52.78	2.9e-11	2.64009	20.3427	-37.23 , 42.51	0.8967	-103.528	1.73647	5.40961	-8.87 , 12.34	0.7482	-102.321	8.03587	35.0099	-60.58 , 76.66	0.8185	-110.739
cg06612130	4	LOC728175	N	-69.7987	10.503	-90.38 , -49.21	3.02e-11	10.9256	18.6765	-25.68 , 47.53	0.5586	-115.653	-10.0298	19.7457	-48.73 , 28.67	0.6115	-85.6303	-120.415	39.0179	-196.89 , -43.94	0.002028	72.5176
cg20658466	7	IGFBP3	N	-71.5516	10.7674	-92.66 , -50.45	3.03e-11	-10.1257	21.9155	-53.08 , 32.83	0.6441	-85.8484	2.60728	5.15664	-7.5 , 12.71	0.6131	-103.644	-3.19291	31.323	-64.59 , 58.2	0.9188	-95.5376
cg24495681	8	COL14A1	N	-100.878	15.1914	-130.65 , -71.1	3.13e-11	1.48559	16.9466	-31.73 , 34.7	0.9301	-101.473	-9.99062	6.74184	-23.2 , 3.22	0.1384	-90.0963	4.81855	30.4103	-54.79 , 64.42	0.8741	-104.777
cg15959363	4	C4orf32	N	-53.8772	8.11568	-69.78 , -37.97	3.17e-11	6.11572	11.7592	-16.93 , 29.16	0.603	-111.351	-4.12667	4.57871	-13.1 , 4.85	0.3674	-92.3406	-28.2656	20.6812	-68.8 , 12.27	0.1717	-47.537
cg00496272	16	CENPT	N	138.303	20.8723	97.39 , 179.21	3.45e-11	72.8074	39.0477	-3.73 , 149.34	0.06224	-47.3567	0.96281	7.36156	-13.47 , 15.39	0.8959	-99.3038	-7.8312	51.5852	-108.94 , 93.28	0.8793	-105.662
cg00921266	7	HOXA3	N	69.4912	10.488	48.93 , 90.05	3.45e-11	47.4201	59.6874	-69.57 , 164.41	0.4269	-31.761	-71.9635	68.8819	-206.97 , 63.04	0.2961	-203.558	-6.15485	161.594	-322.88 , 310.57	0.9696	-108.857
cg00233028	11	CD82	N	69.6964	10.526	49.07 , 90.33	3.56e-11	19.1838	18.4834	-17.04 , 55.41	0.2993	-72.4751	0.64151	5.15945	-9.47 , 10.75	0.901	-99.0796	16.3837	20.3802	-23.56 , 56.33	0.4215	-76.4928
cg04411893	3	SENP2	N	-109.383	16.5205	-141.76 , -77	3.57e-11	36.4366	48.5047	-58.63 , 131.51	0.4525	-133.311	84.9966	58.8254	-30.3 , 200.29	0.1485	-177.706	46.6995	50.544	-52.37 , 145.77	0.3555	-142.694
cg02504211	3	XXYLT1	N	92.6062	14.0013	65.16 , 120.05	3.74e-11	-31.3625	24.4913	-79.37 , 16.64	0.2003	-133.867	-12.3103	7.78173	-27.56 , 2.94	0.1137	-113.293	9.85116	38.3511	-65.32 , 85.02	0.7973	-89.3623
cg06937357	14	PACS2	N	140.321	21.2309	98.71 , 181.93	3.86e-11	9.3568	37.287	-63.73 , 82.44	0.8019	-93.3319	2.62271	8.13014	-13.31 , 18.56	0.747	-98.1309	-29.3938	54.1573	-135.54 , 76.75	0.5873	-120.948
cg04912316	17	UBALD2	N	88.5693	13.425	62.26 , 114.88	4.19e-11	31.6904	24.0709	-15.49 , 78.87	0.188	-64.2196	-3.95972	4.95738	-13.68 , 5.76	0.4244	-104.471	42.7388	53.9442	-62.99 , 148.47	0.4282	-51.7453
cg01919885	4	RGS12	N	63.0231	9.55415	44.3 , 81.75	4.21e-11	23.4105	18.2275	-12.32 , 59.14	0.199	-62.8541	4.76583	4.17957	-3.43 , 12.96	0.2542	-92.438	-17.8617	28.2312	-73.19 , 37.47	0.5269	-128.342
cg13282594	1	PMF1-BGLAP	N	84.7104	12.8441	59.54 , 109.88	4.25e-11	23.9198	20.6421	-16.54 , 64.38	0.2465	-71.7628	1.52963	7.88924	-13.93 , 16.99	0.8463	-98.1943	34.579	43.3548	-50.4 , 119.55	0.4251	-59.1797
cg13597554	15	FAM227B	N	-51.2379	7.7748	-66.48 , -36	4.39e-11	-4.93886	14.5503	-33.46 , 23.58	0.7343	-90.3609	3.65861	5.53712	-7.19 , 14.51	0.5088	-107.14	57.0043	29.7498	-1.31 , 115.31	0.05535	-211.254
cg03679544	6	TIAM2	N	57.0115	8.6611	40.04 , 73.99	4.63e-11	27.3731	13.8529	0.22 , 54.52	0.04816	-51.9867	11.3135	16.2668	-20.57 , 43.2	0.4867	-80.1558	24.8831	21.807	-17.86 , 67.62	0.2538	-56.3543
cg22851200	7	TRIP6	N	68.9925	10.4877	48.44 , 89.55	4.76e-11	37.2167	15.7626	6.32 , 68.11	0.01822	-46.0569	21.999	7.05834	8.16 , 35.83	0.001829	-68.114	12.9301	30.3089	-46.48 , 72.34	0.6697	-81.2586
cg03390636	15	ARNT2	N	-54.7499	8.32569	-71.07 , -38.43	4.83e-11	-2.98998	34.4018	-70.42 , 64.44	0.9307	-94.5388	11.8162	15.5574	-18.68 , 42.31	0.4475	-121.582	69.4948	62.3998	-52.81 , 191.8	0.2654	-226.931
cg02397552	13	CLN5	N	62.2952	9.47688	43.72 , 80.87	4.92e-11	-23.5101	20.6523	-63.99 , 16.97	0.255	-137.74	-3.98312	7.40437	-18.5 , 10.53	0.5906	-106.394	13.5225	45.7767	-76.2 , 103.24	0.7677	-78.2929
cg08441314	11	SORL1	N	-78.8332	12.0012	-102.36 , -55.31	5.07e-11	-15.0264	20.2687	-54.75 , 24.7	0.4585	-80.939	-2.43968	5.57485	-13.37 , 8.49	0.6617	-96.9053	68.1223	38.0298	-6.42 , 142.66	0.07325	-186.413
cg25799241	8	FAM83H	N	51.8732	7.90527	36.38 , 67.37	5.32e-11	37.7039	23.7229	-8.79 , 84.2	0.112	-27.3153	-0.9588	8.58181	-17.78 , 15.86	0.911	-101.848	-59.2581	45.7573	-148.94 , 30.43	0.1953	-214.237
cg05925497	11	ARHGAP42	N	-51.102	7.79467	-66.38 , -35.82	5.53e-11	16.6792	9.00423	-0.97 , 34.33	0.06397	-132.639	-0.43884	3.34853	-7 , 6.12	0.8957	-99.1412	-28.9369	16.3161	-60.92 , 3.04	0.07614	-43.3743
cg15930777	6	EDN1	N	-78.5577	11.9899	-102.06 , -55.06	5.68e-11	-19.8072	19.1279	-57.3 , 17.68	0.3004	-74.7865	1.77295	7.06091	-12.07 , 15.61	0.8017	-102.257	-44.6124	38.8538	-120.77 , 31.54	0.2509	-43.2107
cg13719443	6	LOC285847	N	91.531	13.9714	64.15 , 118.92	5.7e-11	-3.72621	34.6535	-71.65 , 64.19	0.9144	-104.071	-4.18332	7.61515	-19.11 , 10.74	0.5828	-104.57	42.2572	52.2704	-60.19 , 144.71	0.4188	-53.833
cg22039357	1	C1orf21	N	-46.9124	7.164	-60.95 , -32.87	5.82e-11	11.3386	15.7917	-19.61 , 42.29	0.4728	-124.17	-3.34536	4.371	-11.91 , 5.22	0.4441	-92.8689	-7.2517	28.599	-63.31 , 48.8	0.7998	-84.542
cg15700009	11	LDHA	N	74.2886	11.3447	52.05 , 96.52	5.82e-11	5.49742	27.4054	-48.22 , 59.21	0.841	-92.5999	6.40144	5.9001	-5.16 , 17.97	0.2779	-91.383	-54.8057	41.0715	-135.31 , 25.69	0.1821	-173.774
cg03796381	15	C15orf41	N	-60.1728	9.19069	-78.19 , -42.16	5.87e-11	-25.9813	17.0699	-59.44 , 7.48	0.128	-56.8221	-1.44462	6.53003	-14.24 , 11.35	0.8249	-97.5992	37.9481	36.1384	-32.88 , 108.78	0.2937	-163.065
cg25939371	15	CELF6	N	-66.4477	10.1664	-86.37 , -46.52	6.32e-11	-0.56503	16.3601	-32.63 , 31.5	0.9724	-99.1497	-1.20508	8.42954	-17.73 , 15.32	0.8863	-98.1864	-21.3716	43.5071	-106.65 , 63.9	0.6233	-67.837
cg11701868	19	UHRF1	N	64.6469	9.89401	45.25 , 84.04	6.41e-11	-7.26208	19.2986	-45.09 , 30.56	0.7067	-111.233	31.2226	25.6347	-19.02 , 81.47	0.2232	-51.7028	28.4839	37.0735	-44.18 , 101.15	0.4423	-55.9393
cg00508575	12	ATP2B1	N	-64.9348	9.94562	-84.43 , -45.44	6.62e-11	30.5298	20.9032	-10.44 , 71.5	0.1441	-147.016	4.8125	8.02307	-10.91 , 20.54	0.5486	-107.411	-58.5667	37.9459	-132.94 , 15.81	0.1227	-9.8069
cg26297819	22	TEF	N	-97.5229	14.9369	-126.8 , -68.25	6.62e-11	-16.3681	29.1192	-73.44 , 40.71	0.574	-83.2162	39.3439	37.6145	-34.38 , 113.07	0.2956	-140.343	73.4927	55.8756	-36.02 , 183.01	0.1884	-175.359
cg16234490	4	FAM47E	N	-69.1596	10.5964	-89.93 , -48.39	6.72e-11	46.0168	21.397	4.08 , 87.95	0.03151	-166.537	14.0288	7.41966	-0.51 , 28.57	0.05866	-120.285	-58.272	42.5892	-141.75 , 25.2	0.1712	-15.7427
cg15016701	12	PPM1H	N	-62.1717	9.52588	-80.84 , -43.5	6.73e-11	15.6308	29.4826	-42.16 , 73.42	0.596	-125.141	2.89726	6.67468	-10.19 , 15.98	0.6642	-104.66	51.4003	44.7692	-36.35 , 139.15	0.2509	-182.675
cg04500896	2	LOXL3	N	70.433	10.796	49.27 , 91.59	6.85e-11	14.2824	16.1193	-17.31 , 45.88	0.3756	-79.722	-7.87941	6.7424	-21.09 , 5.34	0.2426	-111.187	-30.2454	39.3725	-107.42 , 46.92	0.4424	-142.942
cg11368628	11	SYT8	N	-75.3298	11.5673	-98 , -52.66	7.4e-11	27.6348	25.7566	-22.85 , 78.12	0.2833	-136.685	10.4389	6.80561	-2.9 , 23.78	0.1251	-113.858	21.031	48.9989	-75.01 , 117.07	0.6678	-127.919
cg19029445	17	ABR	N	50.2592	7.71777	35.13 , 65.39	7.41e-11	-19.8306	24.4331	-67.72 , 28.06	0.417	-139.457	-1.43385	28.5876	-57.47 , 54.6	0.96	-102.853	-66.1404	72.0673	-207.39 , 75.11	0.3587	-231.598
cg04436755	15	LOXL1-AS1	N	72.1018	11.0761	50.39 , 93.81	7.53e-11	85.7699	23.8097	39.1 , 132.44	0.0003154	18.9568	8.7893	6.9788	-4.89 , 22.47	0.2079	-87.8099	44.5258	33.6694	-21.47 , 110.52	0.186	-38.2459
cg20948740	2	DNMT3A	N	86.7465	13.3328	60.61 , 112.88	7.7e-11	-5.7498	31.4723	-67.44 , 55.94	0.855	-106.628	4.74966	6.31244	-7.62 , 17.12	0.4518	-94.5247	-68.7942	40.5336	-148.24 , 10.65	0.08966	-179.305
cg09379146	3	TIPARP	N	-52.0692	8.00295	-67.75 , -36.38	7.71e-11	-8.38927	14.6543	-37.11 , 20.33	0.567	-83.8882	-6.11873	5.32486	-16.56 , 4.32	0.2505	-88.2488	-24.0191	23.517	-70.11 , 22.07	0.3071	-53.8708
cg03538922	16	KLHDC4	N	46.7268	7.18342	32.65 , 60.81	7.78e-11	-7.36533	16.3922	-39.49 , 24.76	0.6532	-115.763	-1.51834	5.29809	-11.9 , 8.87	0.7744	-103.249	-3.68621	34.8884	-72.07 , 64.7	0.9159	-107.889
cg18050903	4	RASGEF1B	N	-122.865	18.8917	-159.89 , -85.84	7.84e-11	-2.60835	27.8106	-57.12 , 51.9	0.9253	-97.8771	28.3143	11.4605	5.85 , 50.78	0.01349	-123.045	20.9449	49.5715	-76.22 , 118.11	0.6726	-117.047
cg18299068	4	MAEA	N	75.6072	11.6435	52.79 , 98.43	8.39e-11	5.52336	17.6597	-29.09 , 40.14	0.7545	-92.6947	-33.8812	18.9542	-71.03 , 3.27	0.07385	-144.812	-2.77624	39.9788	-81.13 , 75.58	0.9446	-103.672
cg24159436	3	PLCL2	N	-57.3019	8.833	-74.61 , -39.99	8.74e-11	-13.4853	9.43916	-31.99 , 5.02	0.1531	-76.4662	-3.30424	3.05745	-9.3 , 2.69	0.2798	-94.2336	-17.9926	15.1229	-47.63 , 11.65	0.2341	-68.6004
cg03486991	2	CYP27C1	N	-59.4365	9.16466	-77.4 , -41.47	8.85e-11	-15.9091	17.1164	-49.46 , 17.64	0.3526	-73.2334	-9.87982	5.54196	-20.74 , 0.98	0.07463	-83.3775	-27.0559	22.0486	-70.27 , 16.16	0.2198	-54.4793
cg10469774	11	CD82	N	90.9446	14.0276	63.45 , 118.44	8.98e-11	69.2796	19.3115	31.43 , 107.13	0.0003339	-23.8222	-11.5636	5.82962	-22.99 , -0.14	0.0473	-112.715	33.958	32.4411	-29.63 , 97.54	0.2952	-62.6608
cg12403889	1	DRAXIN	N	-92.2768	14.2393	-120.19 , -64.37	9.15e-11	38.7639	40.6671	-40.94 , 118.47	0.3405	-142.008	75.7698	52.0334	-26.22 , 177.76	0.1453	-182.111	-45.2857	52.092	-147.39 , 56.81	0.3847	-50.9241
cg02577963	19	KDM4B	N	66.9171	10.3515	46.63 , 87.21	1.02e-10	-11.8762	19.1067	-49.33 , 25.57	0.5342	-117.748	9.01579	4.53811	0.12 , 17.91	0.04696	-86.5269	20.8482	31.8217	-41.52 , 83.22	0.5124	-68.8448
cg19358373	12	CHFR	N	73.6109	11.3888	51.29 , 95.93	1.02e-10	2.30063	18.17	-33.31 , 37.91	0.8992	-96.8746	0.37776	5.18274	-9.78 , 10.54	0.9419	-99.4868	-3.43944	29.1481	-60.57 , 53.69	0.9061	-104.672
cg25383605	6	TIAM2	N	82.4609	12.759	57.45 , 107.47	1.03e-10	-4.9875	18.9491	-42.13 , 32.15	0.7924	-106.048	6.30347	9.21209	-11.75 , 24.36	0.4938	-92.3558	14.4313	35.3289	-54.81 , 83.68	0.6829	-82.4993
cg13182599	14	ZFP36L1	N	-88.1574	13.6435	-114.9 , -61.42	1.04e-10	35.3577	29.7055	-22.87 , 93.58	0.2339	-140.108	-5.94315	8.42125	-22.45 , 10.56	0.4804	-93.2585	76.6152	36.5405	5 , 148.23	0.03602	-186.907
cg25513776	6	MYLK4	N	-60.1498	9.31323	-78.4 , -41.9	1.06e-10	-2.35657	14.2281	-30.24 , 25.53	0.8684	-96.0822	-4.33162	17.7629	-39.15 , 30.48	0.8073	-92.7986	4.58577	25.0044	-44.42 , 53.59	0.8545	-107.624
cg08854834	21	MAP3K7CL	N	-91.6114	14.1933	-119.43 , -63.79	1.09e-10	2.49197	18.1075	-33 , 37.98	0.8905	-102.72	-5.9597	8.41453	-22.45 , 10.53	0.4788	-93.4946	39.6997	41.6954	-42.02 , 121.42	0.341	-143.335
cg19295068	19	GLTSCR1	N	46.0757	7.14169	32.08 , 60.07	1.11e-10	-18.1839	14.2354	-46.09 , 9.72	0.2015	-139.465	1.6311	4.17654	-6.55 , 9.82	0.6961	-96.46	-17.4723	17.5822	-51.93 , 16.99	0.3203	-137.921
cg21221767	14	MAX	N	-68.6555	10.645	-89.52 , -47.79	1.12e-10	1.11186	23.6785	-45.3 , 47.52	0.9625	-101.619	2.60851	6.94379	-11 , 16.22	0.7072	-103.799	-62.3931	32.3429	-125.79 , 1	0.05372	-9.12149
cg08381620	13	LINC00327	N	-27.6904	4.29383	-36.11 , -19.27	1.13e-10	10.3833	7.25168	-3.83 , 24.6	0.1522	-137.498	1.47966	7.49992	-13.22 , 16.18	0.8436	-105.344	-20.2256	14.294	-48.24 , 7.79	0.1571	-26.9581
cg02461269	6	ARID1B	N	-84.378	13.0949	-110.04 , -58.71	1.17e-10	31.0982	34.7728	-37.06 , 99.25	0.3711	-136.856	7.02541	7.6684	-8 , 22.06	0.3596	-108.326	-14.6575	48.3122	-109.35 , 80.03	0.7616	-82.6287
cg00394823	16	ACSM3	N	-67.2475	10.4398	-87.71 , -46.79	1.18e-10	-39.6472	32.8816	-104.1 , 24.8	0.2279	-41.0428	24.0195	9.69192	5.02 , 43.02	0.0132	-135.718	-2.9756	67.7702	-135.81 , 129.85	0.965	-95.5751
cg16744911	10	SCD	N	-71.1563	11.0449	-92.8 , -49.51	1.18e-10	12.7656	24.2726	-34.81 , 60.34	0.5989	-117.94	-20.8928	8.92355	-38.38 , -3.4	0.01922	-70.6381	-53.819	44.9415	-141.9 , 34.27	0.2311	-24.3652
cg06850687	12	SMARCC2	N	-72.0525	11.1926	-93.99 , -50.12	1.21e-10	19.4963	16.3724	-12.59 , 51.59	0.2337	-127.058	-2.32771	6.54794	-15.16 , 10.51	0.7222	-96.7694	-46.9155	33.3486	-112.28 , 18.45	0.1595	-34.8871
cg23829395	12	SLC38A2	N	-59.9216	9.30961	-78.17 , -41.67	1.22e-10	3.44503	19.1323	-34.05 , 40.94	0.8571	-105.749	1.63938	7.37369	-12.81 , 16.09	0.8241	-102.736	-31.6359	34.2554	-98.78 , 35.5	0.3557	-47.2044
cg11115622	14	PLEKHG3	N	-74.4605	11.572	-97.14 , -51.78	1.24e-10	-8.70657	20.4862	-48.86 , 31.45	0.6708	-88.3071	-19.5619	5.16061	-29.68 , -9.45	0.0001503	-73.7285	-25.6841	29.7748	-84.04 , 32.67	0.3884	-65.5064
cg07452706	14	NUDT14	N	96.6836	15.0689	67.15 , 126.22	1.4e-10	30.0649	31.4889	-31.65 , 91.78	0.3397	-68.9039	-3.70962	7.65566	-18.71 , 11.3	0.628	-103.837	-41.9584	48.1509	-136.33 , 52.42	0.3835	-143.398
cg04069539	16	ACSF3	N	61.5949	9.60073	42.78 , 80.41	1.4e-10	-3.89288	11.9727	-27.36 , 19.57	0.7451	-106.32	0.44194	5.43967	-10.22 , 11.1	0.9352	-99.2825	-23.6969	19.2961	-61.52 , 14.12	0.2194	-138.472
cg00748072	2	SP3	N	-78.7726	12.2805	-102.84 , -54.7	1.41e-10	-8.40371	22.9907	-53.47 , 36.66	0.7147	-89.3317	3.75776	22.3469	-40.04 , 47.56	0.8665	-104.77	-64.709	43.0105	-149.01 , 19.59	0.1325	-17.8534
cg01832549	1	CAPZB	N	-53.9279	8.40798	-70.41 , -37.45	1.42e-10	-9.22225	16.9595	-42.46 , 24.02	0.5866	-82.8989	1.14004	4.98136	-8.62 , 10.9	0.819	-102.114	-26.2862	33.0025	-90.97 , 38.4	0.4257	-51.2568
cg09726279	17	MYBBP1A	N	109.864	17.142	76.27 , 143.46	1.46e-10	79.0304	31.5643	17.16 , 140.9	0.01229	-28.0651	9.8644	10.347	-10.42 , 30.14	0.3404	-91.0212	-52.1475	47.5364	-145.32 , 41.02	0.2726	-147.466
cg21586223	13	CYSLTR2	N	-53.2289	8.30427	-69.51 , -36.95	1.46e-10	3.04422	16.2949	-28.89 , 34.98	0.8518	-105.719	6.2296	6.38638	-6.29 , 18.75	0.3293	-111.703	15.4764	37.5511	-58.12 , 89.08	0.6802	-129.075
cg07824636	1	DUSP10	N	-64.3376	10.0412	-84.02 , -44.66	1.48e-10	-3.22165	22.2215	-46.78 , 40.33	0.8847	-94.9926	-4.94762	6.54664	-17.78 , 7.88	0.4498	-92.3099	-10.9722	36.7636	-83.03 , 61.08	0.7654	-82.9459
cg13928490	13	GUCY1B2	N	-40.2957	6.29353	-52.63 , -27.96	1.53e-10	14.1994	16.9518	-19.03 , 47.42	0.4022	-135.238	-1.85959	6.47619	-14.55 , 10.83	0.774	-95.3851	1.09209	32.6244	-62.85 , 65.04	0.9733	-102.71
cg10670376	5	ARHGAP26	N	-142.53	22.2618	-186.16 , -98.9	1.53e-10	-9.82932	28.2033	-65.11 , 45.45	0.7275	-93.1037	10.4487	11.2131	-11.53 , 32.43	0.3514	-107.331	88.5615	87.382	-82.71 , 259.83	0.3108	-162.135
cg13149245	15	PIF1	N	-54.1324	8.46268	-70.72 , -37.55	1.59e-10	6.08231	17.7728	-28.75 , 40.92	0.7322	-111.236	10.155	6.34682	-2.28 , 22.59	0.1096	-118.76	-6.53841	28.0619	-61.54 , 48.46	0.8158	-87.9214
cg07626482	19	SLC1A5	N	113.134	17.6912	78.46 , 147.81	1.61e-10	134.413	35.8949	64.06 , 204.77	0.0001807	18.8092	-6.92817	8.29786	-23.19 , 9.34	0.4038	-106.124	88.4403	45.6942	-1.12 , 178	0.05293	-21.8268
cg26432350	3	NBEAL2	N	86.8056	13.5839	60.18 , 113.43	1.66e-10	-8.57928	27.3949	-62.27 , 45.11	0.7542	-109.883	5.08566	6.97151	-8.58 , 18.75	0.4657	-94.1413	-33.3758	37.7198	-107.31 , 40.55	0.3762	-138.449
cg08832695	17	HOXB-AS3	N	81.4674	12.7565	56.46 , 106.47	1.7e-10	35.2312	14.5184	6.78 , 63.69	0.01524	-56.7543	0.02138	5.45309	-10.67 , 10.71	0.9969	-99.9738	-7.31871	22.7763	-51.96 , 37.32	0.748	-108.984
cg22647738	17	CCL16	N	-54.4469	8.52557	-71.16 , -37.74	1.7e-10	-12.9566	13.3103	-39.04 , 13.13	0.3303	-76.2033	-1.52606	3.9767	-9.32 , 6.27	0.7012	-97.1972	7.2642	28.5835	-48.76 , 63.29	0.7994	-113.342
cg10950251	1	PIK3C2B	N	-56.0243	8.77543	-73.22 , -38.82	1.72e-10	22.1679	18.0403	-13.19 , 57.53	0.2191	-139.568	0.30731	6.15912	-11.76 , 12.38	0.9602	-100.549	24.6636	31.0057	-36.11 , 85.43	0.4264	-144.023
cg13696490	3	MIR548H2	N	-52.1995	8.18313	-68.24 , -36.16	1.78e-10	-11.2796	14.7203	-40.13 , 17.57	0.4435	-78.3914	0.68696	15.4963	-29.69 , 31.06	0.9646	-101.316	-18.2481	23.8351	-64.96 , 28.47	0.4439	-65.0417
cg15014975	1	RUNX3	N	40.6606	6.37926	28.16 , 53.16	1.84e-10	-11.6666	11.4441	-34.1 , 10.76	0.308	-128.693	0.1182	2.87422	-5.52 , 5.75	0.9672	-99.7093	40.0175	20.4222	-0.01 , 80.05	0.05005	-1.58158
cg19211915	11	WT1	N	-79.1705	12.4281	-103.53 , -54.81	1.89e-10	-25.9157	24.4402	-73.82 , 21.99	0.289	-67.266	-8.34821	6.7878	-21.65 , 4.96	0.2187	-89.4554	-38.4981	34.3937	-105.91 , 28.91	0.263	-51.3732
cg24019564	1	RUNX3	N	76.8396	12.0637	53.19 , 100.48	1.9e-10	21.1856	21.842	-21.62 , 64	0.3321	-72.4288	0.19314	3.80436	-7.26 , 7.65	0.9595	-99.7486	13.9765	40.0065	-64.44 , 92.39	0.7268	-81.8108
cg20876852	7	MEST	N	-65.7896	10.3381	-86.05 , -45.53	1.97e-10	-5.00286	13.8407	-32.13 , 22.12	0.7178	-92.3957	6.9249	14.8616	-22.2 , 36.05	0.6412	-110.526	7.45061	23.901	-39.4 , 54.3	0.7552	-111.325
cg24796852	19	GMFG	N	-77.8503	12.2348	-101.83 , -53.87	1.98e-10	33.5333	28.4945	-22.32 , 89.38	0.2393	-143.074	11.4028	4.85233	1.89 , 20.91	0.01877	-114.647	-14.7266	37.7317	-88.68 , 59.23	0.6963	-81.0834
cg02149069	12	IFFO1	N	82.1818	12.9245	56.85 , 107.51	2.04e-10	20.5833	28.2273	-34.74 , 75.91	0.4659	-74.9539	-4.38594	9.63555	-23.27 , 14.5	0.649	-105.337	20.8099	44.2006	-65.82 , 107.44	0.6378	-74.6782
cg11835355	22	APOL3	N	-85.2441	13.4219	-111.55 , -58.94	2.14e-10	20.2149	19.7432	-18.48 , 58.91	0.3059	-123.714	6.41077	7.74638	-8.77 , 21.59	0.4079	-107.52	-3.69365	36.9648	-76.14 , 68.76	0.9204	-95.667
cg26995224	12	KDM2B	N	52.8578	8.3342	36.52 , 69.19	2.26e-10	16.347	11.9541	-7.08 , 39.78	0.1715	-69.0736	4.48164	4.46065	-4.26 , 13.22	0.315	-91.5213	-36.0191	16.9674	-69.28 , -2.76	0.03377	-168.143
cg04031093	1	NTPCR	N	-53.1302	8.37838	-69.55 , -36.71	2.28e-10	-15.4467	14.0862	-43.06 , 12.16	0.2728	-70.9267	0.37873	3.81894	-7.11 , 7.86	0.921	-100.713	-35.1466	23.6691	-81.54 , 11.24	0.1376	-33.848
cg27089226	3	ZDHHC19	N	-66.2158	10.4471	-86.69 , -45.74	2.33e-10	18.9942	21.1889	-22.54 , 60.52	0.37	-128.685	30.7953	30.1173	-28.23 , 89.83	0.3065	-146.507	22.6198	34.7886	-45.57 , 90.81	0.5156	-134.161
cg27389255	11	PSMA1	N	61.864	9.76611	42.72 , 81.01	2.38e-10	-0.77553	14.0035	-28.22 , 26.67	0.9558	-101.254	-4.65339	9.03929	-22.37 , 13.06	0.6067	-107.522	-81.0203	37.6428	-154.8 , -7.24	0.03137	-230.965
cg23434428	10	PRKCQ	N	-57.4354	9.07362	-75.22 , -39.65	2.45e-10	-2.94175	16.0239	-34.35 , 28.47	0.8543	-94.8782	-8.05297	4.19109	-16.27 , 0.16	0.05467	-85.9791	27.104	34.3652	-40.25 , 94.46	0.4303	-147.19
cg13869942	1	THEM4	N	-39.3718	6.22141	-51.57 , -27.18	2.48e-10	12.7663	17.0252	-20.6 , 46.14	0.4533	-132.425	6.25612	6.84444	-7.16 , 19.67	0.3607	-115.89	-20.2105	25.5034	-70.2 , 29.78	0.4281	-48.6677
cg07795325	4	CAMK2D	N	-67.218	10.6223	-88.04 , -46.4	2.48e-10	7.53431	19.8485	-31.37 , 46.44	0.7042	-111.209	2.8903	8.53118	-13.83 , 19.61	0.7348	-104.3	10.508	31.3248	-50.89 , 71.9	0.7373	-115.633
cg20204986	11	WT1	N	-49.581	7.8368	-64.94 , -34.22	2.51e-10	-31.9178	12.3457	-56.12 , -7.72	0.009728	-35.6248	-9.23707	6.31399	-21.61 , 3.14	0.1435	-81.3697	-84.3295	32.4255	-147.88 , -20.78	0.009303	70.0845
cg07042014	14	LTB4R	N	-87.3815	13.8179	-114.46 , -60.3	2.55e-10	2.1113	37.0708	-70.55 , 74.77	0.9546	-102.416	6.86998	5.9159	-4.73 , 18.47	0.2455	-107.862	-29.568	52.75	-132.96 , 73.82	0.5751	-66.1622
cg05433805	3	LRRFIP2	N	-48.3715	7.64973	-63.36 , -33.38	2.56e-10	8.58651	8.67595	-8.42 , 25.59	0.3223	-117.751	2.98684	2.70721	-2.32 , 8.29	0.2699	-106.175	0.03355	12.7725	-25 , 25.07	0.9979	-100.069
cg20283107	8	FAM91A1	N	-57.2071	9.0496	-74.94 , -39.47	2.59e-10	-20.8428	15.0431	-50.33 , 8.64	0.1659	-63.566	-12.5091	5.85872	-23.99 , -1.03	0.03275	-78.1336	-14.9185	31.9146	-77.47 , 47.63	0.6402	-73.922
cg07488576	2	SDPR	N	-125.644	19.879	-164.61 , -86.68	2.61e-10	-32.8855	35.3774	-102.23 , 36.45	0.3526	-73.8265	-4.53129	11.6903	-27.44 , 18.38	0.6983	-96.3935	-55.532	66.8278	-186.51 , 75.45	0.406	-55.8021
cg25662857	17	CD7	N	81.2189	12.8498	56.03 , 106.4	2.61e-10	-26.9928	29.2253	-84.27 , 30.29	0.3557	-133.235	-16.8173	13.4099	-43.1 , 9.47	0.2098	-120.706	13.0964	44.5302	-74.18 , 100.38	0.7687	-83.8752
cg00971695	14	PLEKHG3	N	-67.8796	10.7459	-88.94 , -46.82	2.67e-10	-28.809	24.6677	-77.16 , 19.54	0.2429	-57.5587	-2.81904	5.24978	-13.11 , 7.47	0.5913	-95.847	-36.6797	35.1449	-105.56 , 32.2	0.2966	-45.9636
cg25536676	1	DHCR24	N	-96.6338	15.314	-126.65 , -66.62	2.79e-10	14.0487	32.3176	-49.29 , 77.39	0.6638	-114.538	1.97952	5.41914	-8.64 , 12.6	0.7149	-102.048	-27.1847	46.2794	-117.89 , 63.52	0.5569	-71.8683
cg05460571	8	MFHAS1	N	72.2768	11.4574	49.82 , 94.73	2.82e-10	39.6353	24.1447	-7.69 , 86.96	0.1007	-45.1618	-2.59032	8.90825	-20.05 , 14.87	0.7712	-103.584	-33.5528	47.4356	-126.53 , 59.42	0.4794	-146.423
cg21228424	6	PRPH2	N	42.5494	6.74599	29.33 , 55.77	2.84e-10	-27.3195	18.5706	-63.72 , 9.08	0.1413	-164.207	3.69336	5.60056	-7.28 , 14.67	0.5096	-91.3198	43.8184	38.8564	-32.34 , 119.98	0.2594	2.98232
cg25773386	3	GPR62	N	-114.565	18.1727	-150.18 , -78.95	2.9e-10	-57.3396	41.3172	-138.32 , 23.64	0.1652	-49.9501	-2.83795	7.08799	-16.73 , 11.05	0.6889	-97.5228	-29.9756	68.4603	-164.16 , 104.21	0.6615	-73.8353
cg27593537	10	SFXN3	N	122.486	19.4323	84.4 , 160.57	2.92e-10	-73.8188	33.5239	-139.53 , -8.11	0.02767	-160.267	-1.53445	13.0981	-27.21 , 24.14	0.9067	-101.253	56.1231	57.067	-55.73 , 167.97	0.3254	-54.18
cg05950943	16	NTN3	N	-112.391	17.8418	-147.36 , -77.42	2.99e-10	-21.3111	39.2515	-98.24 , 55.62	0.5872	-81.0385	-14.052	11.6717	-36.93 , 8.82	0.2286	-87.4972	-40.5185	47.9974	-134.59 , 53.56	0.3986	-63.9488
cg23317857	6	TFEB	N	72.428	11.5012	49.89 , 94.97	3.03e-10	17.1758	23.5321	-28.95 , 63.3	0.4655	-76.2857	-7.0988	10.6316	-27.94 , 13.74	0.5043	-109.801	54.8694	50.0135	-43.16 , 152.9	0.2726	-24.2428
cg04011671	2	HAAO	N	61.6205	9.78696	42.44 , 80.8	3.05e-10	17.4581	11.419	-4.92 , 39.84	0.1263	-71.6683	4.81801	4.82438	-4.64 , 14.27	0.3179	-92.1812	-8.75256	30.5231	-68.58 , 51.07	0.7743	-114.204
cg27066989	13	GUCY1B2	N	-58.76	9.33851	-77.06 , -40.46	3.13e-10	33.2912	31.8856	-29.2 , 95.79	0.2964	-156.656	-2.30455	15.088	-31.88 , 27.27	0.8786	-96.078	49.389	61.7543	-71.65 , 170.43	0.4238	-184.052
cg06388350	4	PDLIM5	N	-53.7596	8.54385	-70.51 , -37.01	3.13e-10	-18.7957	28.3782	-74.42 , 36.83	0.5078	-65.0375	15.6976	8.415	-0.8 , 32.19	0.06212	-129.2	-11.9378	48.2894	-106.58 , 82.71	0.8047	-77.794
cg07157107	8	CHRNA6	N	-63.9924	10.1805	-83.95 , -44.04	3.26e-10	0.02425	20.4923	-40.14 , 40.19	0.9991	-100.038	16.4696	5.54884	5.59 , 27.35	0.002996	-125.737	-68.0642	34.3188	-135.33 , -0.8	0.04734	6.36295
cg00095326	1	RHOU	N	71.1358	11.3256	48.94 , 93.33	3.37e-10	26.0824	16.2573	-5.78 , 57.95	0.1086	-63.3344	4.5164	5.8424	-6.93 , 15.97	0.4395	-93.651	18.7939	31.4199	-42.79 , 80.38	0.5497	-73.5803
cg09546258	11	GAL	N	-105.241	16.7679	-138.11 , -72.38	3.47e-10	13.427	28.4786	-42.39 , 69.25	0.6373	-112.758	15.1274	8.84507	-2.21 , 32.46	0.08722	-114.374	-45.864	51.0422	-145.91 , 54.18	0.3689	-56.42
cg10397819	14	EIF2B2	N	99.3515	15.8349	68.32 , 130.39	3.51e-10	-19.0031	25.8419	-69.65 , 31.65	0.4621	-119.127	2.33229	8.6052	-14.53 , 19.2	0.7864	-97.6525	17.9701	43.383	-67.06 , 103	0.6787	-81.9126
cg20309640	1	LOC730102	N	64.241	10.2606	44.13 , 84.35	3.83e-10	-15.9175	16.8194	-48.88 , 17.05	0.344	-124.778	-1.54522	6.38271	-14.06 , 10.96	0.8087	-102.405	-52.9807	36.4387	-124.4 , 18.44	0.146	-182.472
cg26196087	1	NOTCH2	N	-74.8557	11.9567	-98.29 , -51.42	3.84e-10	-4.75228	17.4128	-38.88 , 29.38	0.7849	-93.6514	-0.19556	7.48706	-14.87 , 14.48	0.9792	-99.7388	-13.8595	37.1727	-86.72 , 59	0.7093	-81.485
cg21788755	3	TREX1	N	77.8361	12.442	53.45 , 102.22	3.95e-10	-8.83458	26.8106	-61.38 , 43.71	0.7418	-111.35	2.32981	9.65054	-16.59 , 21.24	0.8092	-97.0068	-58.9661	41.1589	-139.64 , 21.71	0.152	-175.757
cg19889855	3	PARP15	N	-55.0905	8.80642	-72.35 , -37.83	3.96e-10	-27.1837	15.8115	-58.17 , 3.81	0.08557	-50.6563	0.78776	16.7179	-31.98 , 33.55	0.9624	-101.43	-12.1946	29.2765	-69.58 , 45.19	0.677	-77.8644
cg01426808	8	LINC00536	N	-62.587	10.0106	-82.21 , -42.97	4.05e-10	-22.0664	22.7075	-66.57 , 22.44	0.3312	-64.7428	9.1475	5.59607	-1.82 , 20.12	0.1021	-114.616	6.04485	33.953	-60.5 , 72.59	0.8587	-109.658
cg25122233	12	HOXC4	N	-45.3405	7.25397	-59.56 , -31.12	4.09e-10	-21.7952	15.3784	-51.94 , 8.35	0.1564	-51.93	-32.9526	16.8783	-66.03 , 0.13	0.05089	-27.3219	-79.2093	20.06	-118.53 , -39.89	7.861e-05	74.6986
cg02499214	12	RHOF	N	96.5584	15.4517	66.27 , 126.84	4.13e-10	16.9438	29.7624	-41.39 , 75.28	0.5692	-82.4523	55.9549	55.7387	-53.29 , 165.2	0.3154	-42.0507	9.09992	53.2622	-95.29 , 113.49	0.8643	-90.5757
cg11334730	6	LY86	N	71.4145	11.4314	49.01 , 93.82	4.18e-10	9.94894	20.4343	-30.1 , 50	0.6263	-86.0687	2.9393	6.32589	-9.46 , 15.34	0.6422	-95.8842	-25.4673	40.7253	-105.29 , 54.35	0.5317	-135.661
cg15521790	11	MAML2	N	-61.5587	9.85623	-80.88 , -42.24	4.22e-10	21.3346	14.8388	-7.75 , 50.42	0.1505	-134.657	8.93345	6.37323	-3.56 , 21.42	0.161	-114.512	-23.9211	21.3974	-65.86 , 18.02	0.2636	-61.141
cg14251267	20	ZBTB46	N	37.6007	6.02165	25.8 , 49.4	4.26e-10	12.6341	7.0016	-1.09 , 26.36	0.07116	-66.3993	3.38707	2.91812	-2.33 , 9.11	0.2458	-90.992	6.37115	16.8864	-26.73 , 39.47	0.706	-83.0558
cg04304130	6	SMIM13	N	62.611	10.0306	42.95 , 82.27	4.32e-10	34.5832	17.49	0.3 , 68.86	0.04801	-44.765	36.4897	17.2366	2.71 , 70.27	0.03426	-41.72	37.3346	31.447	-24.3 , 98.97	0.2351	-40.3706
cg25936358	13	ATP4B	N	-67.8352	10.8693	-89.14 , -46.53	4.35e-10	-27.5135	16.6621	-60.17 , 5.14	0.09868	-59.4408	-12.4606	7.44742	-27.06 , 2.14	0.0943	-81.631	69.1471	40.0766	-9.4 , 147.7	0.08446	-201.934
cg09790270	1	SLC41A1	N	-79.2148	12.6977	-104.1 , -54.33	4.42e-10	18.9253	27.1666	-34.32 , 72.17	0.486	-123.891	-9.97987	5.8503	-21.45 , 1.49	0.08803	-87.4015	-25.9445	36.4031	-97.29 , 45.41	0.476	-67.248
cg11125758	14	SEL1L	N	46.6226	7.47729	31.97 , 61.28	4.51e-10	11.8681	12.0997	-11.85 , 35.58	0.3267	-74.5444	1.26912	3.8642	-6.3 , 8.84	0.7426	-97.2779	7.6458	14.9172	-21.59 , 36.88	0.6083	-83.6006
cg14541011	9	RALGDS	N	68.9742	11.0661	47.28 , 90.66	4.58e-10	-21.9282	19.9592	-61.05 , 17.19	0.2719	-131.792	2.5317	11.8621	-20.72 , 25.78	0.831	-96.3295	41.3192	36.5196	-30.26 , 112.9	0.2579	-40.0948
cg10902738	8	ST3GAL1	N	-53.5619	8.60358	-70.42 , -36.7	4.8e-10	14.255	17.3918	-19.83 , 48.34	0.4124	-126.614	-16.0432	17.5189	-50.38 , 18.29	0.3598	-70.0473	4.08095	28.0953	-50.99 , 59.15	0.8845	-107.619
cg16014412	1	TMEM201	N	100.562	16.1631	68.88 , 132.24	4.92e-10	29.3195	38.6219	-46.38 , 105.02	0.4478	-70.8445	-1.80914	7.89038	-17.27 , 13.66	0.8186	-101.799	11.5064	54.2524	-94.83 , 117.84	0.832	-88.558
cg27051129	13	DLEU7-AS1	N	63.5841	10.2198	43.55 , 83.61	4.92e-10	-2.07859	16.671	-34.75 , 30.6	0.9008	-103.269	9.72198	6.85018	-3.7 , 23.15	0.1558	-84.71	-1.43978	39.666	-79.19 , 76.31	0.971	-102.264
cg06405563	17	MYO15B	N	55.8423	8.97688	38.25 , 73.44	4.95e-10	3.43856	12.4017	-20.87 , 27.75	0.7816	-93.8424	-6.22088	4.00253	-14.07 , 1.62	0.1201	-111.14	-18.8252	25.3319	-68.48 , 30.83	0.4574	-133.711
cg16396933	10	NT5C2	N	-49.2529	7.91834	-64.77 , -33.73	4.97e-10	7.30484	19.8395	-31.58 , 46.19	0.7127	-114.831	-0.65605	5.41683	-11.27 , 9.96	0.9036	-98.668	-44.9021	43.0507	-129.28 , 39.48	0.2969	-8.83353
cg23702848	14	XRCC3	N	49.8659	8.02002	34.15 , 65.59	5.05e-10	2.79418	13.3626	-23.4 , 28.98	0.8344	-94.3966	1.41166	5.02917	-8.45 , 11.27	0.7789	-97.1691	14.4765	31.7566	-47.77 , 76.72	0.6485	-70.9692
cg10078415	16	ACSM3	N	-52.3544	8.42247	-68.86 , -35.85	5.1e-10	22.9263	21.5571	-19.33 , 65.18	0.2875	-143.791	-27.8837	64.4591	-154.22 , 98.46	0.6653	-46.7403	66.6873	72.7353	-75.87 , 209.25	0.3592	-227.377
cg10905180	11	OR51E2	N	-33.706	5.42294	-44.33 , -23.08	5.12e-10	-4.11707	13.5042	-30.59 , 22.35	0.7605	-87.7853	3.58641	26.6131	-48.58 , 55.75	0.8928	-110.64	-32.9198	38.6535	-108.68 , 42.84	0.3944	-2.33246
cg23865980	10	ZMIZ1	N	-70.3876	11.337	-92.61 , -48.17	5.34e-10	3.86228	27.9743	-50.97 , 58.69	0.8902	-105.487	-6.50299	6.10196	-18.46 , 5.46	0.2865	-90.7612	-56.7797	36.1604	-127.65 , 14.09	0.1164	-19.3329
cg04396112	7	MAD1L1	N	36.2473	5.83867	24.8 , 47.69	5.36e-10	-6.07105	10.7698	-27.18 , 15.04	0.5729	-116.749	8.70447	12.2268	-15.26 , 32.67	0.4765	-75.9859	19.3244	19.5863	-19.06 , 57.71	0.3238	-46.6872
cg11474701	11	SC5D	N	-49.054	7.90146	-64.54 , -33.57	5.36e-10	0.64685	15.9376	-30.59 , 31.88	0.9676	-101.319	-23.9489	17.2071	-57.67 , 9.78	0.164	-51.1785	-1.31912	30.1447	-60.4 , 57.76	0.9651	-97.3109
cg21912938	7	JAZF1-AS1	N	-99.8182	16.0903	-131.36 , -68.28	5.52e-10	49.4252	33.7349	-16.7 , 115.55	0.1429	-149.515	163.345	68.1576	29.76 , 296.93	0.01655	-263.642	91.4817	76.0637	-57.6 , 240.57	0.2291	-191.648
cg24352369	2	CBWD2	N	-52.4962	8.46406	-69.09 , -35.91	5.57e-10	-1.37643	14.6936	-30.18 , 27.42	0.9254	-97.378	-18.3271	18.0485	-53.7 , 17.05	0.3099	-65.0887	49.664	22.0765	6.39 , 92.93	0.02447	-194.605
cg14717666	4	SYNPO2	N	-54.6333	8.81045	-71.9 , -37.36	5.61e-10	2.04225	13.5351	-24.49 , 28.57	0.8801	-103.738	-25.0422	12.8434	-50.22 , 0.13	0.0512	-54.1631	-17.0931	18.4253	-53.21 , 19.02	0.3536	-68.7131
cg12949547	12	XRCC6BP1	N	-80.8768	13.047	-106.45 , -55.3	5.69e-10	30.4531	27.4652	-23.38 , 84.28	0.2675	-137.654	10.1148	7.54662	-4.68 , 24.91	0.1801	-112.506	-60.4761	41.0053	-140.85 , 19.89	0.1403	-25.2243
cg12562461	17	PLEKHM1P	N	87.1391	14.0692	59.56 , 114.71	5.88e-10	11.5319	27.7855	-42.93 , 65.99	0.6781	-86.7661	-33.0375	15.0789	-62.59 , -3.48	0.02845	-137.913	24.3937	70.8912	-114.55 , 163.34	0.7308	-72.0061
cg09825327	1	TRAF5	N	87.5191	14.1309	59.82 , 115.22	5.89e-10	-9.39746	28.1859	-64.64 , 45.85	0.7388	-110.738	-11.4529	12.4383	-35.83 , 12.93	0.3572	-113.086	-6.02389	46.977	-98.1 , 86.05	0.898	-106.883
cg15995125	1	RCC2	N	77.8381	12.5788	53.18 , 102.49	6.09e-10	11.9355	21.992	-31.17 , 55.04	0.5873	-84.6663	9.82404	4.46117	1.08 , 18.57	0.02766	-87.3789	-17.7946	36.1296	-88.61 , 53.02	0.6224	-122.861
cg05478824	17	ASPSCR1	N	99.7189	16.1188	68.13 , 131.31	6.15e-10	-28.7342	14.4545	-57.07 , -0.4	0.04682	-128.815	-0.87428	6.6005	-13.81 , 12.06	0.8946	-100.877	-28.3809	26.3746	-80.08 , 23.31	0.2819	-128.461
cg22778120	22	PRR5	N	46.832	7.57121	31.99 , 61.67	6.19e-10	4.47319	12.1795	-19.4 , 28.34	0.7134	-90.4484	-0.33742	4.33259	-8.83 , 8.15	0.9379	-100.72	22.544	19.7727	-16.21 , 61.3	0.2542	-51.8621
cg08274637	13	DLEU7-AS1	N	50.1577	8.11206	34.26 , 66.06	6.29e-10	4.48639	15.6138	-26.12 , 35.09	0.7739	-91.0554	11.2203	5.09189	1.24 , 21.2	0.02755	-77.6299	-10.6344	25.2571	-60.14 , 38.87	0.6737	-121.202
cg01368219	3	CACNA2D3	N	47.1166	7.62189	32.18 , 62.06	6.34e-10	14.7575	20.3876	-25.2 , 54.72	0.4692	-68.6787	12.6195	8.67564	-4.38 , 29.62	0.1458	-73.2164	-12.6122	34.4393	-80.11 , 54.89	0.7142	-126.768
cg08643339	4	GALNTL6	N	-57.2731	9.27146	-75.45 , -39.1	6.52e-10	-4.58574	16.1745	-36.29 , 27.12	0.7768	-91.9932	-0.68102	4.798	-10.09 , 8.72	0.8871	-98.8109	-38.0177	30.8237	-98.43 , 22.4	0.2174	-33.6203
cg10322443	14	MIR4708	N	87.6124	14.1838	59.81 , 115.41	6.54e-10	-10.728	18.708	-47.4 , 25.94	0.5663	-112.245	1.53988	6.68993	-11.57 , 14.65	0.818	-98.2424	62.7108	34.0914	-4.11 , 129.53	0.06584	-28.4225
cg12876356	1	GFI1	N	22.0782	3.57522	15.07 , 29.09	6.6e-10	3.4494	6.85918	-9.99 , 16.89	0.615	-84.3765	-6.53277	7.41449	-21.07 , 8	0.3783	-129.589	3.34983	18.3976	-32.71 , 39.41	0.8555	-84.8275
cg02264407	13	LMO7	N	60.5277	9.80637	41.31 , 79.75	6.73e-10	56.2484	24.9901	7.27 , 105.23	0.0244	-7.06999	4.72932	10.1038	-15.07 , 24.53	0.6397	-92.1865	39.5351	44.7659	-48.21 , 127.28	0.3772	-34.6826
cg13598409	20	KCNK15	N	-95.6187	15.4971	-125.99 , -65.24	6.82e-10	26.6306	29.0868	-30.38 , 83.64	0.3599	-127.851	-25.66	32.8468	-90.04 , 38.72	0.4347	-73.1642	-2.68834	52.1673	-104.94 , 99.56	0.9589	-97.1885
cg09026568	22	TRABD	N	59.6156	9.66356	40.68 , 78.56	6.87e-10	18.1296	19.5596	-20.21 , 56.47	0.354	-69.5891	7.39089	6.72262	-5.79 , 20.57	0.2716	-87.6024	-1.23643	28.5614	-57.22 , 54.74	0.9655	-102.074
cg16398956	14	EML1	N	-91.9207	14.9146	-121.15 , -62.69	7.13e-10	8.37395	47.4919	-84.71 , 101.46	0.86	-109.11	1.84301	13.5052	-24.63 , 28.31	0.8915	-102.005	51.4925	57.1869	-60.59 , 163.58	0.3679	-156.018
cg06560379	6	NFKBIE	N	119.317	19.3614	81.37 , 157.27	7.16e-10	76.9515	31.4735	15.26 , 138.64	0.01449	-35.5067	-15.2467	10.0942	-35.03 , 4.54	0.1309	-112.778	-53.1942	47.9167	-147.11 , 40.72	0.2669	-144.582
cg25376651	13	EEF1DP3	N	-57.3379	9.30948	-75.58 , -39.09	7.32e-10	-0.89261	16.6914	-33.61 , 31.82	0.9574	-98.4432	1.63568	19.1023	-35.8 , 39.08	0.9318	-102.853	5.42668	18.9527	-31.72 , 42.57	0.7746	-109.464
cg02583484	12	HNRNPA1	N	75.362	12.2441	51.36 , 99.36	7.51e-10	61.1904	25.1344	11.93 , 110.45	0.01491	-18.8047	9.16761	7.22119	-4.99 , 23.32	0.2042	-87.8352	0.32804	35.6066	-69.46 , 70.12	0.9926	-99.5647
cg18835596	6	MYB	N	-73.4534	11.9407	-96.86 , -50.05	7.68e-10	-10.7979	19.8518	-49.71 , 28.11	0.5865	-85.2997	-13.3333	6.65179	-26.37 , -0.3	0.04502	-81.8479	5.49907	36.5468	-66.13 , 77.13	0.8804	-107.486
cg02892925	8	TOX	N	-40.7959	6.63349	-53.8 , -27.79	7.75e-10	-24.0601	11.0805	-45.78 , -2.34	0.0299	-41.0231	-5.16011	4.55713	-14.09 , 3.77	0.2575	-87.3514	-54.3222	23.9039	-101.17 , -7.47	0.02305	33.1561
cg22877452	1	NFIA	N	30.7131	4.99413	20.92 , 40.5	7.76e-10	12.4491	9.57551	-6.32 , 31.22	0.1936	-59.4664	-1.94764	4.42778	-10.63 , 6.73	0.66	-106.341	-29.057	21.147	-70.51 , 12.39	0.1694	-194.608
cg11036672	4	TRMT44	N	79.4563	12.9203	54.13 , 104.78	7.76e-10	-2.47786	24.187	-49.88 , 44.93	0.9184	-103.119	3.48513	9.01876	-14.19 , 21.16	0.6992	-95.6138	-32.6486	51.6016	-133.79 , 68.49	0.5269	-141.09
cg10173172	8	TMEM65	N	80.2463	13.0519	54.66 , 105.83	7.84e-10	46.8892	23.0613	1.69 , 92.09	0.04203	-41.5683	-1.58291	8.42619	-18.1 , 14.93	0.851	-101.973	21.3288	49.1747	-75.05 , 117.71	0.6645	-73.4208
cg03565674	11	MOB2	N	90.2123	14.6738	61.45 , 118.97	7.85e-10	13.4937	24.9277	-35.36 , 62.35	0.5883	-85.0423	-6.93359	9.95463	-26.44 , 12.58	0.4861	-107.686	21.5537	55.3481	-86.93 , 130.04	0.697	-76.1078
cg13641903	11	WT1	N	-57.1075	9.29207	-75.32 , -38.9	7.96e-10	-13.8408	19.7781	-52.61 , 24.92	0.484	-75.7635	-6.8293	7.0249	-20.6 , 6.94	0.331	-88.0413	-90.8182	33.1195	-155.73 , -25.9	0.006104	59.0302
cg26681628	16	FTO	N	-56.4827	9.19233	-74.5 , -38.47	8.02e-10	-62.2886	13.45	-88.65 , -35.93	3.637e-06	10.2789	-6.30824	4.90807	-15.93 , 3.31	0.1987	-88.8316	-81.5728	29.1467	-138.7 , -24.45	0.005131	44.4208
cg20730966	3	GLB1	N	-70.4744	11.47	-92.96 , -47.99	8.04e-10	31.525	23.6431	-14.82 , 77.87	0.1824	-144.733	-5.18659	6.32784	-17.59 , 7.22	0.4124	-92.6405	-30.2373	51.3407	-130.87 , 70.39	0.5559	-57.0946
cg27132471	15	SLCO3A1	N	-109.112	17.7624	-143.93 , -74.3	8.11e-10	2.33416	31.7478	-59.89 , 64.56	0.9414	-102.139	5.96029	61.0122	-113.62 , 125.54	0.9222	-105.463	7.02376	53.4855	-97.81 , 111.86	0.8955	-106.437
cg13203135	21	C21orf33	N	45.171	7.35466	30.76 , 59.59	8.16e-10	11.3209	13.7133	-15.56 , 38.2	0.4091	-74.9375	-0.42431	4.46189	-9.17 , 8.32	0.9242	-100.939	-36.8359	20.0006	-76.04 , 2.37	0.06551	-181.548
cg03726147	1	DMAP1	N	80.3433	13.0905	54.69 , 106	8.38e-10	13.4583	24.0749	-33.73 , 60.65	0.5761	-83.249	16.8036	7.90057	1.32 , 32.29	0.03343	-79.0852	0.01574	54.4218	-106.65 , 106.68	0.9998	-99.9804
cg06178669	11	HRASLS2	N	-45.2191	7.36809	-59.66 , -30.78	8.4e-10	6.56842	13.0238	-18.96 , 32.1	0.614	-114.526	-1.82413	17.5555	-36.23 , 32.58	0.9172	-95.966	-29.4455	34.0072	-96.1 , 37.21	0.3866	-34.8825
cg06874403	10	SKIDA1	N	66.4698	10.8347	45.23 , 87.71	8.52e-10	41.8333	21.5636	-0.43 , 84.1	0.05238	-37.0642	0.28573	6.99766	-13.43 , 14	0.9674	-99.5701	62.5478	34.0119	-4.12 , 129.21	0.06592	-5.90036
cg27139419	15	IGF1R	N	-49.4508	8.06385	-65.26 , -33.65	8.66e-10	-28.1801	15.1678	-57.91 , 1.55	0.06318	-43.0138	-1.72185	3.67562	-8.93 , 5.48	0.6395	-96.5181	5.26222	24.0697	-41.91 , 52.44	0.8269	-110.641
cg19374752	12	GRASP	N	60.7231	9.90528	41.31 , 80.14	8.77e-10	41.6213	18.1429	6.06 , 77.18	0.02179	-31.4572	3.44288	7.22531	-10.72 , 17.6	0.6337	-94.3302	4.47733	44.326	-82.4 , 91.36	0.9195	-92.6266
cg02331649	3	TMEM110-MUSTN1	N	-58.3467	9.5181	-77 , -39.69	8.78e-10	25.6657	22.8187	-19.06 , 70.39	0.2607	-143.988	-5.65231	5.44907	-16.33 , 5.03	0.2996	-90.3126	-68.4298	35.0233	-137.08 , 0.22	0.05072	17.2813
cg25311963	1	MIB2	N	61.584	10.0498	41.89 , 81.28	8.9e-10	46.3351	17.7398	11.57 , 81.11	0.009003	-24.7611	3.36515	7.76501	-11.85 , 18.58	0.6647	-94.5357	-117.912	30.8755	-178.43 , -57.4	0.000134	-291.466
cg14839898	11	TIMM8B	N	-153.969	25.1496	-203.26 , -104.68	9.23e-10	-4.18248	33.3323	-69.51 , 61.15	0.9001	-97.2836	-4.65777	12.2069	-28.58 , 19.27	0.7028	-96.9749	-65.9603	61.6133	-186.72 , 54.8	0.2844	-57.16
cg17061862	11	WEE1	N	-41.0304	6.70476	-54.17 , -27.89	9.38e-10	38.4517	17.3956	4.36 , 72.55	0.02708	-193.715	-9.21827	7.50166	-23.92 , 5.48	0.2191	-77.5331	-29.8455	29.3794	-87.43 , 27.74	0.3097	-27.2602
cg04052013	11	TNNT3	N	94.2089	15.4066	64.01 , 124.41	9.67e-10	37.9844	26.5324	-14.02 , 89.99	0.1523	-59.6807	0.51342	7.96451	-15.1 , 16.12	0.9486	-99.455	-23.0959	51.2799	-123.6 , 77.41	0.6524	-124.516
cg03636488	12	EP400	N	50.3748	8.24226	34.22 , 66.53	9.85e-10	30.7435	16.6491	-1.89 , 63.38	0.06481	-38.9704	-4.45063	3.71147	-11.73 , 2.82	0.2305	-108.835	-0.36955	28.575	-56.38 , 55.64	0.9897	-100.734
cg16476991	13	RASA3	N	84.6804	13.8633	57.51 , 111.85	1.01e-09	12.5319	21.3759	-29.36 , 54.43	0.5577	-85.2009	47.5163	47.7955	-46.16 , 141.2	0.3201	-43.8875	12.4899	63.2485	-111.48 , 136.46	0.8435	-85.2505
cg04222728	7	KIAA1549	N	-108.267	17.7323	-143.02 , -73.51	1.02e-09	-22.5629	18.7796	-59.37 , 14.25	0.2296	-79.16	6.44774	8.18891	-9.6 , 22.5	0.4311	-105.955	-10.0424	32.5633	-73.87 , 53.78	0.7578	-90.7245
cg11046602	17	SPOP	N	-76.1162	12.48	-100.58 , -51.66	1.07e-09	17.1986	18.0451	-18.17 , 52.57	0.3405	-122.595	5.70155	7.23911	-8.49 , 19.89	0.4309	-107.491	-31.1692	35.555	-100.86 , 38.52	0.3807	-59.0505
cg22583147	3	TOPAZ1	N	-87.7354	14.3924	-115.94 , -59.53	1.09e-09	-2.82028	20.1776	-42.37 , 36.73	0.8888	-96.7855	-5.07645	6.90174	-18.6 , 8.45	0.462	-94.2139	-5.3138	35.7686	-75.42 , 64.79	0.8819	-93.9434
cg21155834	2	MBD5	N	-105.767	17.3572	-139.79 , -71.75	1.1e-09	-25.7993	41.2026	-106.56 , 54.96	0.5312	-75.6074	-19.8838	10.8413	-41.13 , 1.37	0.06664	-81.2003	-61.0411	62.0488	-182.66 , 60.57	0.3252	-42.287
cg27115863	22	CARD10	N	-82.79	13.5921	-109.43 , -56.15	1.12e-09	-36.862	26.53	-88.86 , 15.14	0.1647	-55.4753	2.37206	7.87531	-13.06 , 17.81	0.7633	-102.865	-24.2863	31.8108	-86.64 , 38.06	0.4452	-70.6652
cg02255004	4	PCAT4	N	-68.4806	11.2412	-90.51 , -46.45	1.12e-09	1.47966	19.0446	-35.85 , 38.81	0.9381	-102.161	-6.63221	6.9946	-20.34 , 7.08	0.343	-90.3152	-83.5123	36.9418	-155.92 , -11.11	0.02378	21.9503
cg06890610	16	SNX29	N	64.4744	10.5896	43.72 , 85.23	1.14e-09	19.0429	25.8464	-31.62 , 69.7	0.4613	-70.4644	-0.32469	6.66046	-13.38 , 12.73	0.9611	-100.504	-70.634	80.5046	-228.42 , 87.15	0.3803	-209.554
cg04004830	2	SDPR	N	-82.2504	13.5075	-108.73 , -55.78	1.14e-09	-16.9705	27.0757	-70.04 , 36.1	0.5308	-79.3673	1.18186	10.603	-19.6 , 21.96	0.9112	-101.437	37.6115	48.4033	-57.26 , 132.48	0.4371	-145.728
cg27134910	2	SLC8A1	N	-43.4301	7.13306	-57.41 , -29.45	1.14e-09	5.02104	11.9158	-18.33 , 28.38	0.6735	-111.561	1.2996	4.13342	-6.8 , 9.4	0.7532	-102.992	-10.8972	19.9732	-50.04 , 28.25	0.5853	-74.9086
cg24843003	19	DAZAP1	N	68.7595	11.3016	46.61 , 90.91	1.17e-09	39.6046	19.6265	1.14 , 78.07	0.0436	-42.4012	-8.19046	8.75524	-25.35 , 8.97	0.3495	-111.912	-19.868	38.0586	-94.46 , 54.73	0.6016	-128.895
cg05910124	8	TRAPPC9	N	63.4712	10.4347	43.02 , 83.92	1.18e-09	-29.003	18.9561	-66.16 , 8.15	0.126	-145.695	-6.58867	5.60074	-17.57 , 4.39	0.2394	-110.381	-18.175	25.5526	-68.26 , 31.91	0.4769	-128.635
cg26413708	6	TRERF1	N	-68.5781	11.2765	-90.68 , -46.48	1.19e-09	20.2064	19.221	-17.47 , 57.88	0.2931	-129.465	7.71406	9.01155	-9.95 , 25.38	0.392	-111.249	-47.761	48.2287	-142.29 , 46.77	0.322	-30.3553
cg17758673	4	RGS12	N	48.449	7.96944	32.83 , 64.07	1.21e-09	3.25599	14.8424	-25.84 , 32.35	0.8264	-93.2796	-1.23556	5.83028	-12.66 , 10.19	0.8322	-102.55	-0.89275	29.0999	-57.93 , 56.14	0.9755	-101.843
cg25311470	7	NRCAM	N	72.9137	11.9941	49.41 , 96.42	1.21e-09	-2.70227	23.2105	-48.19 , 42.79	0.9073	-103.706	4.1331	5.90396	-7.44 , 15.7	0.4839	-94.3315	20.169	37.4202	-53.17 , 93.51	0.5899	-72.3386
cg09935388	1	GFI1	N	25.1416	4.13809	17.03 , 33.25	1.24e-09	9.3268	7.52511	-5.42 , 24.08	0.2152	-62.9029	-2.81892	8.18464	-18.86 , 13.22	0.7305	-111.212	17.8878	15.2059	-11.92 , 47.69	0.2394	-28.852
cg03969902	1	LINC00982	N	38.9177	6.40644	26.36 , 51.47	1.24e-09	2.56367	17.2167	-31.18 , 36.31	0.8816	-93.4126	52.3137	33.4218	-13.19 , 117.82	0.1175	34.4211	-142.782	71.5265	-282.97 , -2.59	0.04591	-466.882
cg05057834	3	ITGA9	N	96.4398	15.8795	65.32 , 127.56	1.25e-09	-44.6285	25.5898	-94.78 , 5.53	0.08116	-146.276	-7.0967	6.40648	-19.65 , 5.46	0.268	-107.359	44.0899	45.143	-44.39 , 132.57	0.3287	-54.2825
cg10755899	4	FGFR3	N	65.3066	10.7559	44.22 , 86.39	1.27e-09	-3.75199	15.9952	-35.1 , 27.6	0.8145	-105.745	2.47252	4.86255	-7.06 , 12	0.6111	-96.214	-10.8015	25.123	-60.04 , 38.44	0.6672	-116.54
cg19523667	7	ZMIZ2	N	72.438	11.9447	49.03 , 95.85	1.32e-09	75.2852	25.7547	24.81 , 125.76	0.003465	3.93051	9.98984	8.17555	-6.03 , 26.01	0.2217	-86.2091	-43.0857	44.8615	-131.01 , 44.84	0.3368	-159.479
cg09098522	10	ZNF438	N	66.49	10.9695	44.99 , 87.99	1.35e-09	-31.743	25.3536	-81.44 , 17.95	0.2106	-147.741	-3.99125	7.04494	-17.8 , 9.82	0.571	-106.003	26.33	39.3468	-50.79 , 103.45	0.5034	-60.4
cg14035521	9	POLR1E	N	106.623	17.5992	72.13 , 141.12	1.38e-09	53.112	32.9773	-11.52 , 117.75	0.1073	-50.187	-7.52922	7.83753	-22.89 , 7.83	0.3367	-107.062	45.0732	43.1017	-39.41 , 129.55	0.2957	-57.7264
cg08947774	4	PALLD	N	-54.6875	9.03045	-72.39 , -36.99	1.4e-09	48.1715	14.9302	18.91 , 77.43	0.001253	-188.085	-7.98354	5.78206	-19.32 , 3.35	0.1674	-85.4015	-19.6076	30.005	-78.42 , 39.2	0.5134	-64.1462
cg00602416	10	SKIDA1	N	67.905	11.2133	45.93 , 89.88	1.4e-09	-43.6686	33.5015	-109.33 , 21.99	0.1924	-164.308	40.5517	32.5039	-23.16 , 104.26	0.2122	-40.2817	-101.603	104.047	-305.54 , 102.33	0.3288	-249.626
cg01351032	16	CIITA	N	-67.7838	11.2001	-89.74 , -45.83	1.43e-09	1.31676	27.153	-51.9 , 54.54	0.9613	-101.943	5.87741	10.2115	-14.14 , 25.89	0.5649	-108.671	26.9151	48.6445	-68.43 , 122.26	0.5801	-139.707
cg14090409	17	CCDC57	N	110.06	18.1967	74.39 , 145.73	1.46e-09	2.36353	28.6234	-53.74 , 58.47	0.9342	-97.8525	1.21531	10.3571	-19.08 , 21.52	0.9066	-98.8958	-36.8641	75.5571	-184.96 , 111.23	0.6256	-133.494
cg20186396	17	CD7	N	87.0489	14.3963	58.83 , 115.27	1.48e-09	22.7121	31.9182	-39.85 , 85.27	0.4767	-73.9088	-43.8961	18.5023	-80.16 , -7.63	0.01767	-150.427	25.6399	48.7505	-69.91 , 121.19	0.5989	-70.5454
cg14785527	10	STAMBPL1	N	-60.4054	9.99383	-79.99 , -40.82	1.5e-09	16.373	27.8598	-38.23 , 70.98	0.5567	-127.105	2.68637	38.7916	-73.35 , 78.72	0.9448	-104.447	-18.0374	47.1126	-110.38 , 74.3	0.7018	-70.1395
cg03180134	4	MAML3	N	59.1469	9.78881	39.96 , 78.33	1.52e-09	-16.6569	21.977	-59.73 , 26.42	0.4485	-128.162	5.1529	7.89201	-10.32 , 20.62	0.5138	-91.288	0.57244	30.3228	-58.86 , 60.01	0.9849	-99.0322
cg21726551	12	ADGRD1	N	71.2413	11.7932	48.13 , 94.36	1.53e-09	-1.77593	23.3661	-47.57 , 44.02	0.9394	-102.493	3.37977	5.32333	-7.05 , 13.81	0.5255	-95.2559	-57.537	46.1108	-147.91 , 32.84	0.2121	-180.764
cg13601957	8	TOX	N	-66.5453	11.0167	-88.14 , -44.95	1.54e-09	4.91519	19.7689	-33.83 , 43.66	0.8036	-107.386	0.25665	6.50479	-12.49 , 13.01	0.9685	-100.386	0.5339	35.8199	-69.67 , 70.74	0.9881	-100.802
cg23404711	14	FOS	N	60.6292	10.0393	40.95 , 80.31	1.55e-09	25.5876	23.7116	-20.89 , 72.06	0.2805	-57.7965	1.09638	8.25611	-15.09 , 17.28	0.8944	-98.1917	-121.744	61.6742	-242.63 , -0.86	0.04838	-300.801
cg17783244	22	PATZ1	N	50.1382	8.30364	33.86 , 66.41	1.56e-09	-11.2066	14.4843	-39.6 , 17.18	0.4391	-122.351	10.2823	6.30921	-2.08 , 22.65	0.1032	-79.4922	-12.8939	34.4578	-80.43 , 54.64	0.7083	-125.717
cg00448875	3	RAB6B	N	-54.7949	9.07578	-72.58 , -37.01	1.57e-09	9.30212	24.7359	-39.18 , 57.78	0.7069	-116.976	-5.82752	9.14339	-23.75 , 12.09	0.5239	-89.3649	10.284	47.5027	-82.82 , 103.39	0.8286	-118.768
cg19876649	18	MYOM1	N	-61.2262	10.1421	-81.1 , -41.35	1.57e-09	-5.87048	20.7439	-46.53 , 34.79	0.7772	-90.4118	-9.69508	6.4709	-22.38 , 2.99	0.1341	-84.1651	-98.2082	42.5985	-181.7 , -14.72	0.02114	60.4022
cg27396284	7	HDAC9	N	-60.9469	10.0961	-80.74 , -41.16	1.57e-09	-2.3272	16.8141	-35.28 , 30.63	0.8899	-96.1816	2.93095	5.87215	-8.58 , 14.44	0.6177	-104.809	30.6499	33.9843	-35.96 , 97.26	0.3671	-150.289
cg05512157	12	DIP2B	N	56.4314	9.35067	38.1 , 74.76	1.59e-09	-8.18186	14.8835	-37.35 , 20.99	0.5825	-114.499	9.56753	17.9947	-25.7 , 44.84	0.5949	-83.0457	52.4411	36.0454	-18.21 , 123.09	0.1457	-7.07096
cg18944752	4	RGS12	N	-46.5742	7.72003	-61.71 , -31.44	1.61e-09	55.5605	17.5209	21.22 , 89.9	0.001519	-219.295	12.8104	5.32434	2.37 , 23.25	0.01613	-127.505	-2.93441	27.9703	-57.76 , 51.89	0.9164	-93.6995
cg10671066	1	SLAMF6	N	-82.8586	13.7512	-109.81 , -55.91	1.69e-09	18.3994	30.1767	-40.75 , 77.55	0.542	-122.206	15.4127	7.25895	1.19 , 29.64	0.03373	-118.601	14.4469	58.5764	-100.36 , 129.26	0.8052	-117.436
cg07565956	17	ZBTB4	N	85.4477	14.186	57.64 , 113.25	1.71e-09	-3.18528	30.3919	-62.75 , 56.38	0.9165	-103.728	2.13456	6.37749	-10.37 , 14.63	0.7378	-97.5019	-6.65151	38.8517	-82.8 , 69.5	0.8641	-107.784
cg13430552	2	DNMT3A	N	63.3443	10.5204	42.72 , 83.96	1.73e-09	33.9367	18.143	-1.62 , 69.5	0.06141	-46.4249	2.56492	7.45064	-12.04 , 17.17	0.7307	-95.9508	19.9233	35.0261	-48.73 , 88.57	0.5695	-68.5476
cg25936138	5	TRIM36	N	61.0438	10.1406	41.17 , 80.92	1.75e-09	21.9572	18.3802	-14.07 , 57.98	0.2322	-64.0304	0.69641	4.24607	-7.63 , 9.02	0.8697	-98.8592	25.2647	25.093	-23.92 , 74.45	0.314	-58.6122
cg15331996	10	ANAPC16	N	92.0433	15.2935	62.07 , 122.02	1.76e-09	-12.7135	36.2716	-83.81 , 58.38	0.726	-113.812	44.0897	37.8017	-30 , 118.18	0.2435	-52.099	-18.2763	43.8529	-104.23 , 67.68	0.6769	-119.856
cg02332696	10	CASC10	N	-116.564	19.3805	-154.55 , -78.58	1.81e-09	41.0722	37.656	-32.73 , 114.88	0.2754	-135.236	11.2673	8.1316	-4.67 , 27.21	0.1659	-109.666	63.5032	64.8662	-63.63 , 190.64	0.3276	-154.479
cg01723892	1	MAP10	N	-48.3678	8.0495	-64.14 , -32.59	1.87e-09	-29.354	18.8131	-66.23 , 7.52	0.1187	-39.3108	-5.11985	5.94317	-16.77 , 6.53	0.389	-89.4147	13.3863	32.478	-50.27 , 77.04	0.6802	-127.676
cg17819250	8	KCNU1	N	-55.9302	9.30817	-74.17 , -37.69	1.87e-09	10.5339	19.1489	-27 , 48.07	0.5822	-118.834	-1.3372	6.57751	-14.23 , 11.55	0.8389	-97.6092	-48.5735	34.623	-116.43 , 19.29	0.1606	-13.1534
cg14397120	9	QSOX2	N	90.2182	15.0165	60.79 , 119.65	1.88e-09	-50.4772	27.7591	-104.89 , 3.93	0.069	-155.95	-11.4561	10.4692	-31.98 , 9.06	0.2738	-112.698	-130.665	101.517	-329.64 , 68.31	0.1981	-244.832
cg21249754	12	PTPN6	N	76.341	12.7156	51.42 , 101.26	1.93e-09	51.5258	29.0866	-5.48 , 108.54	0.07648	-32.5057	-11.7766	47.5884	-105.05 , 81.5	0.8045	-115.426	30.1216	49.4287	-66.76 , 127	0.5423	-60.5433
cg07552087	16	MLST8	N	-64.5815	10.7598	-85.67 , -43.49	1.95e-09	3.50462	18.4539	-32.66 , 39.67	0.8494	-105.427	3.84719	5.13621	-6.22 , 13.91	0.4538	-105.957	-31.8414	46.5292	-123.04 , 59.36	0.4938	-50.6958
cg03278811	6	FOXO3	N	96.1338	16.0185	64.74 , 127.53	1.96e-09	9.85191	35.8588	-60.43 , 80.14	0.7835	-89.7519	-3.00566	12.4004	-27.31 , 21.3	0.8085	-103.127	16.9745	62.1035	-104.75 , 138.7	0.7846	-82.3428
cg02348437	2	MPP4	N	-57.5699	9.59553	-76.38 , -38.76	1.98e-09	-13.5354	16.841	-46.54 , 19.47	0.4216	-76.4887	-5.33028	5.09081	-15.31 , 4.65	0.2951	-90.7412	-53.6715	36.0138	-124.26 , 16.92	0.1361	-6.77153
cg07951201	13	METTL21C	N	-44.9154	7.48916	-59.59 , -30.24	2.01e-09	22.6038	14.2883	-5.4 , 50.61	0.1137	-150.325	-12.7749	19.5181	-51.03 , 25.48	0.5128	-71.5578	-10.6783	25.4122	-60.49 , 39.13	0.6743	-76.2256
cg23630423	17	RTN4RL1	N	58.8849	9.81971	39.64 , 78.13	2.02e-09	7.0228	14.395	-21.19 , 35.24	0.6256	-88.0737	1.63318	5.44065	-9.03 , 12.3	0.764	-97.2265	1.31934	34.1315	-65.58 , 68.22	0.9692	-97.7595
cg07285708	3	TATDN2	N	121.445	20.2638	81.73 , 161.16	2.06e-09	48.5842	33.6912	-17.45 , 114.62	0.1493	-59.9949	25.393	9.34346	7.08 , 43.71	0.006573	-79.0909	-59.0942	57.8806	-172.54 , 54.35	0.3073	-148.659
cg04310331	11	MRPL23-AS1	N	108.122	18.0462	72.75 , 143.49	2.08e-09	67.8045	40.074	-10.74 , 146.35	0.09065	-37.2889	6.66206	9.67918	-12.31 , 25.63	0.4913	-93.8384	84.5047	51.7049	-16.84 , 185.85	0.1022	-21.8432
cg12158889	2	SUCLG1	N	-61.2607	10.2417	-81.33 , -41.19	2.21e-09	13.0242	17.8425	-21.95 , 48	0.4654	-121.26	-2.39477	7.62395	-17.34 , 12.55	0.7534	-96.0909	-102.141	37.9667	-176.56 , -27.73	0.007139	66.7319
cg01439112	3	CTDSPL	N	-134.731	22.5286	-178.89 , -90.57	2.23e-09	-20.8752	52.7408	-124.25 , 82.5	0.6922	-84.506	-9.99627	11.0019	-31.56 , 11.57	0.3636	-92.5806	15.8946	47.8554	-77.9 , 109.69	0.7398	-111.797
cg25921609	17	MYH10	N	46.2081	7.72829	31.06 , 61.36	2.24e-09	0.14464	14.3044	-27.89 , 28.18	0.9919	-99.687	0.3906	4.63387	-8.69 , 9.47	0.9328	-99.1547	-15.6727	25.6531	-65.95 , 34.61	0.5412	-133.918
cg12103569	12	SFSWAP	N	55.3268	9.25403	37.19 , 73.46	2.25e-09	20.5191	20.2344	-19.14 , 60.18	0.3105	-62.9129	3.68913	6.28474	-8.63 , 16.01	0.5572	-93.3321	-11.0638	34.3447	-78.38 , 56.25	0.7473	-119.997
cg13725803	13	GUCY1B2	N	-45.6076	7.62932	-60.56 , -30.65	2.26e-09	32.4744	26.0972	-18.68 , 83.62	0.2134	-171.204	-2.90204	7.4483	-17.5 , 11.7	0.6968	-93.6369	2.7108	41.7549	-79.13 , 84.55	0.9482	-105.944
cg06996175	19	GNG7	N	65.6806	10.9899	44.14 , 87.22	2.28e-09	13.3423	21.5593	-28.91 , 55.6	0.536	-79.6861	8.58923	7.52952	-6.17 , 23.35	0.254	-86.9227	29.1246	27.718	-25.2 , 83.45	0.2934	-55.6573
cg01115380	6	FOXC1	N	-42.0076	7.03048	-55.79 , -28.23	2.3e-09	9.20028	10.9636	-12.29 , 30.69	0.4014	-121.901	-19.1702	15.6545	-49.85 , 11.51	0.2207	-54.3651	-25.21	22.1255	-68.58 , 18.16	0.2545	-39.9871
cg26357744	3	RASSF1	N	151.019	25.2768	101.48 , 200.56	2.31e-09	92.4226	39.5779	14.85 , 170	0.01953	-38.8006	-2.86939	16.2226	-34.67 , 28.93	0.8596	-101.9	-27.3931	66.3598	-157.46 , 102.67	0.6798	-118.139
cg06967124	5	FLT4	N	54.4613	9.11818	36.59 , 72.33	2.33e-09	40.1258	15.7992	9.16 , 71.09	0.01109	-26.3224	-2.52425	4.71886	-11.77 , 6.72	0.5927	-104.635	55.2265	23.2562	9.64 , 100.81	0.01756	1.40507
cg05155595	2	ANXA4	N	-67.3421	11.2741	-89.44 , -45.24	2.33e-09	11.3311	16.6438	-21.29 , 43.95	0.496	-116.826	11.9229	6.61619	-1.04 , 24.89	0.07153	-117.705	-25.6831	37.8061	-99.78 , 48.42	0.4969	-61.8618
cg16069079	15	DLL4	N	69.5656	11.6492	46.73 , 92.4	2.35e-09	38.9723	21.0773	-2.34 , 80.28	0.06446	-43.9777	-7.83601	5.44229	-18.5 , 2.83	0.1499	-111.264	34.8643	25.6503	-15.41 , 85.14	0.1741	-49.8829
cg08958168	16	SLC12A4	N	79.8904	13.3844	53.66 , 106.12	2.39e-09	51.1874	33.5447	-14.56 , 116.93	0.127	-35.928	16.0064	15.7914	-14.94 , 46.96	0.3108	-79.9645	20.3197	45.2871	-68.44 , 109.08	0.6537	-74.5655
cg08400424	5	ARHGAP26	N	-68.2669	11.439	-90.69 , -45.85	2.4e-09	61.514	30.9868	0.78 , 122.25	0.04713	-190.108	5.62333	6.90122	-7.9 , 19.15	0.4152	-108.237	-48.7401	43.7987	-134.59 , 37.11	0.2658	-28.6037
cg22996783	11	MYEOV	N	-79.6124	13.3539	-105.79 , -53.44	2.5e-09	11.0285	22.7158	-33.49 , 55.55	0.6273	-113.853	1.57908	3.94793	-6.16 , 9.32	0.6892	-101.983	-34.4533	37.4886	-107.93 , 39.02	0.3581	-56.7237
cg27661394	4	STX18-AS1	N	-78.8391	13.2241	-104.76 , -52.92	2.5e-09	-6.45859	22.2269	-50.02 , 37.11	0.7714	-91.8079	-17.6624	8.2872	-33.91 , -1.42	0.03307	-77.5969	24.0844	41.2034	-56.67 , 104.84	0.5589	-130.549
cg14765414	13	MCF2L	N	82.3003	13.8076	55.24 , 109.36	2.52e-09	48.6407	22.021	5.48 , 91.8	0.02719	-40.8986	-6.6225	5.47012	-17.34 , 4.1	0.226	-108.047	34.644	46.3082	-56.12 , 125.41	0.4544	-57.9054
cg07137429	10	PYROXD2	N	-82.3459	13.8199	-109.43 , -55.26	2.55e-09	-27.0001	26.3671	-78.68 , 24.68	0.3058	-67.2113	-20.0194	8.61992	-36.91 , -3.12	0.02021	-75.6887	-21.7425	51.1068	-121.91 , 78.43	0.6705	-73.5961
cg12532095	6	LINC00473	N	66.0424	11.0877	44.31 , 87.77	2.58e-09	24.5521	17.6391	-10.02 , 59.12	0.1639	-62.8237	3.99766	6.62678	-8.99 , 16.99	0.5463	-93.9468	50.9548	34.2181	-16.11 , 118.02	0.1365	-22.8452
cg06452184	4	ADGRL3	N	55.2535	9.27803	37.07 , 73.44	2.6e-09	32.3839	13.7225	5.49 , 59.28	0.01828	-41.3903	47.2433	15.47	16.92 , 77.56	0.002259	-14.4973	32.4566	26.6477	-19.77 , 84.69	0.2232	-41.2588
cg11323439	11	CREB3L1	N	-75.8265	12.7327	-100.78 , -50.87	2.6e-09	9.5245	31.8474	-52.9 , 71.95	0.7649	-112.561	36.0497	39.6978	-41.76 , 113.86	0.3638	-147.542	59.4726	43.189	-25.18 , 144.12	0.1685	-178.432
cg03487027	10	ZNF503	N	44.6912	7.50541	29.98 , 59.4	2.61e-09	37.6719	28.4421	-18.07 , 93.42	0.1853	-15.7064	37.0441	68.0117	-96.26 , 170.35	0.586	-17.111	-272.622	135.131	-537.48 , -7.77	0.04365	-710.013
cg04276057	2	C2orf82	N	88.4952	14.8742	59.34 , 117.65	2.69e-09	42.0385	30.6844	-18.1 , 102.18	0.1707	-52.4963	-17.2986	12.1691	-41.15 , 6.55	0.1552	-119.548	-14.7766	48.0628	-108.98 , 79.43	0.7585	-116.698
cg09364590	6	TIAM2	N	78.1134	13.1306	52.38 , 103.85	2.7e-09	25.026	19.8516	-13.88 , 63.94	0.2074	-67.962	-1.33419	9.1282	-19.23 , 16.56	0.8838	-101.708	-1.72956	39.0707	-78.31 , 74.85	0.9647	-102.214
cg13594903	9	STOML2	N	117.226	19.7129	78.59 , 155.86	2.74e-09	52.7279	27.9599	-2.07 , 107.53	0.05932	-55.0204	9.67141	12.4605	-14.75 , 34.09	0.4377	-91.7498	44.8179	44.7813	-42.95 , 132.59	0.3169	-61.768
cg00739778	17	RAP1GAP2	N	-54.2336	9.12101	-72.11 , -36.36	2.75e-09	-0.80407	15.2456	-30.69 , 29.08	0.9579	-98.5174	-1.39015	3.87787	-8.99 , 6.21	0.72	-97.4367	-27.4852	26.8797	-80.17 , 25.2	0.3065	-49.3207
cg01514538	1	LINC00982	N	48.7096	8.19292	32.65 , 64.77	2.76e-09	15.9389	27.335	-37.64 , 69.52	0.5598	-67.2777	158.15	93.8075	-25.71 , 342.01	0.09181	224.68	-69.4818	67.249	-201.29 , 62.33	0.3015	-242.645
cg25776343	10	PALD1	N	-62.2102	10.4643	-82.72 , -41.7	2.77e-09	59.2052	27.4431	5.42 , 112.99	0.03098	-195.17	14.0695	7.0025	0.34 , 27.79	0.04451	-122.616	-41.1364	45.8286	-130.96 , 48.69	0.3694	-33.8752
cg03717364	2	HAAO	N	43.2003	7.26905	28.95 , 57.45	2.8e-09	24.9656	15.1449	-4.72 , 54.65	0.09926	-42.2096	-1.2776	4.35412	-9.81 , 7.26	0.7692	-102.957	-22.5855	34.3433	-89.9 , 44.73	0.5108	-152.281
cg14827929	4	TLR3	N	53.6974	9.0404	35.98 , 71.42	2.86e-09	26.2554	24.6789	-22.12 , 74.63	0.2874	-51.1049	-4.15366	10.9856	-25.69 , 17.38	0.7054	-107.735	71.8051	78.9662	-82.97 , 226.58	0.3632	33.7218
cg17237086	22	MKL1	N	74.0693	12.4791	49.61 , 98.53	2.93e-09	-3.89241	31.1853	-65.02 , 57.23	0.9007	-105.255	-6.61007	9.05571	-24.36 , 11.14	0.4654	-108.924	-64.6433	46.5027	-155.79 , 26.5	0.1645	-187.274
cg06231285	7	LRCH4	N	58.0352	9.78163	38.86 , 77.21	2.97e-09	12.7541	9.46705	-5.8 , 31.31	0.1779	-78.0235	-8.69284	5.67123	-19.81 , 2.42	0.1253	-114.979	14.7881	64.6099	-111.85 , 141.42	0.819	-74.5188
cg15895197	2	EMILIN1	N	68.9678	11.6324	46.17 , 91.77	3.05e-09	36.0187	16.2768	4.12 , 67.92	0.02691	-47.7746	54.0374	18.1899	18.39 , 89.69	0.002971	-21.6484	27.6044	31.1562	-33.46 , 88.67	0.3756	-59.975
cg13599248	6	SLC17A5	N	-41.5463	7.00883	-55.28 , -27.81	3.07e-09	-5.93992	15.8041	-36.92 , 25.04	0.707	-85.7029	-4.98635	3.74843	-12.33 , 2.36	0.1834	-87.9981	-6.08439	23.5381	-52.22 , 40.05	0.796	-85.3551
cg13425938	9	EGFL7	N	75.4388	12.7295	50.49 , 100.39	3.1e-09	14.4995	18.3143	-21.4 , 50.4	0.4285	-80.7798	-1.09109	7.62283	-16.03 , 13.85	0.8862	-101.446	-45.7426	34.7811	-113.91 , 22.43	0.1885	-160.635
cg00930606	22	PATZ1	N	81.1827	13.7009	54.33 , 108.04	3.12e-09	58.1973	28.4512	2.43 , 113.96	0.0408	-28.3132	8.73251	8.51569	-7.96 , 25.42	0.3051	-89.2434	-70.3713	41.1067	-150.94 , 10.2	0.08691	-186.683
cg25098174	17	CYB561	N	-98.3915	16.609	-130.95 , -65.84	3.14e-09	-28.4324	38.3518	-103.6 , 46.74	0.4585	-71.1028	4.96165	7.71273	-10.16 , 20.08	0.52	-105.043	76.1446	60.9159	-43.25 , 195.54	0.2113	-177.389
cg03841312	22	MIRLET7BHG	N	60.3592	10.1917	40.38 , 80.33	3.17e-09	16.0773	28.1074	-39.01 , 71.17	0.5673	-73.364	-10.751	7.31354	-25.09 , 3.58	0.1416	-117.812	-40.8764	62.905	-164.17 , 82.42	0.5158	-167.722
cg08305942	16	MAF	N	-58.9573	9.95789	-78.47 , -39.44	3.21e-09	-11.871	17.8653	-46.89 , 23.14	0.5064	-79.865	-10.2897	6.62968	-23.28 , 2.7	0.1206	-82.5471	29.6619	36.9865	-42.83 , 102.16	0.4226	-150.311
cg03337886	13	IRS2	N	73.6595	12.4423	49.27 , 98.05	3.22e-09	-17.2151	13.7358	-44.14 , 9.71	0.2101	-123.371	-5.77648	7.06165	-19.62 , 8.06	0.4134	-107.842	-30.6181	63.1995	-154.49 , 93.25	0.6281	-141.567
cg07996594	1	RUNX3	N	66.08	11.1653	44.2 , 87.96	3.25e-09	-0.94276	17.2447	-34.74 , 32.86	0.9564	-101.427	-3.27446	4.69382	-12.47 , 5.93	0.4854	-104.955	26.6151	78.4845	-127.21 , 180.44	0.7345	-59.723
cg03661409	2	GLS	N	-91.3658	15.4398	-121.63 , -61.1	3.27e-09	-14.4147	20.1285	-53.87 , 25.04	0.4739	-84.2231	-4.37338	10.3294	-24.62 , 15.87	0.672	-95.2133	24.2179	31.4616	-37.45 , 85.88	0.4414	-126.506
cg10583311	12	FBRSL1	N	64.182	10.8504	42.92 , 85.45	3.32e-09	-28.2653	18.6366	-64.79 , 8.26	0.1294	-144.039	-10.3772	6.56813	-23.25 , 2.5	0.1141	-116.168	-94.262	43.9406	-180.39 , -8.14	0.03194	-246.867
cg00091302	1	RGS8	N	-52.383	8.85737	-69.74 , -35.02	3.34e-09	4.88362	15.9673	-26.41 , 36.18	0.7597	-109.323	-2.03362	5.12912	-12.09 , 8.02	0.6917	-96.1178	-21.2086	40.4282	-100.45 , 58.03	0.5999	-59.5124
cg01820192	21	LINC00319	N	86.8772	14.6922	58.08 , 115.67	3.36e-09	41.7084	29.55	-16.21 , 99.63	0.1581	-51.9916	-6.76575	6.43127	-19.37 , 5.84	0.2928	-107.788	51.4048	49.0197	-44.67 , 147.48	0.2943	-40.8306
cg13631444	8	TRHR	N	42.1236	7.12456	28.16 , 56.09	3.37e-09	18.3385	15.2019	-11.46 , 48.13	0.2277	-56.465	-10.0297	6.12539	-22.04 , 1.98	0.1015	-123.81	-36.4136	25.2918	-85.99 , 13.16	0.1499	-186.444
cg02473287	2	YWHAQ	N	-85.5421	14.4691	-113.9 , -57.18	3.38e-09	-15.3599	19.2052	-53 , 22.28	0.4238	-82.044	-0.86049	6.55516	-13.71 , 11.99	0.8956	-98.9941	-37.2681	52.4451	-140.06 , 65.52	0.4773	-56.4331
cg21505925	21	DYRK1A	N	-49.0787	8.30234	-65.35 , -32.81	3.39e-09	8.09734	17.9835	-27.15 , 43.35	0.6525	-116.499	-1.42125	5.8178	-12.82 , 9.98	0.807	-97.1041	-0.70871	29.5584	-58.64 , 57.23	0.9809	-98.556
cg11854981	6	TRERF1	N	-47.166	7.97919	-62.81 , -31.53	3.4e-09	43.5393	20.9054	2.56 , 84.51	0.03728	-192.311	4.25146	6.81253	-9.1 , 17.6	0.5326	-109.014	25.0191	35.2244	-44.02 , 94.06	0.4775	-153.045
cg19827875	1	NAV1	N	32.5643	5.5143	21.76 , 43.37	3.52e-09	10.6142	10.0095	-9 , 30.23	0.289	-67.4053	-4.02413	2.0704	-8.08 , 0.03	0.05194	-112.357	21.792	25.0615	-27.33 , 70.91	0.3846	-33.0801
cg07589393	7	SKAP2	N	-70.9773	12.0221	-94.54 , -47.41	3.55e-09	-3.88621	17.9216	-39.01 , 31.24	0.8283	-94.5247	-14.1661	20.3469	-54.05 , 25.71	0.4863	-80.0414	6.44549	32.8907	-58.02 , 70.91	0.8446	-109.081
cg12065777	17	TRPV2	N	-61.0669	10.3431	-81.34 , -40.79	3.55e-09	1.66311	25.3241	-47.97 , 51.3	0.9476	-102.723	10.6855	7.68882	-4.38 , 25.76	0.1646	-117.498	4.17233	40.292	-74.8 , 83.14	0.9175	-106.832
cg13251842	22	MIRLET7BHG	N	45.3019	7.67305	30.26 , 60.34	3.55e-09	0.2998	26.474	-51.59 , 52.19	0.991	-99.3382	-9.00975	8.64113	-25.95 , 7.93	0.2971	-119.888	-70.2891	84.5286	-235.97 , 95.39	0.4057	-255.157
cg12374579	17	ASPSCR1	N	53.3703	9.04297	35.65 , 71.09	3.59e-09	-30.1096	19.72	-68.76 , 8.54	0.1268	-156.416	9.96311	6.54812	-2.87 , 22.8	0.1281	-81.3321	5.61497	47.0909	-86.68 , 97.91	0.9051	-89.4792
cg23895055	2	NIFK	N	65.3124	11.0676	43.62 , 87	3.61e-09	-3.11941	18.1175	-38.63 , 32.39	0.8633	-104.776	-5.51376	6.69761	-18.64 , 7.61	0.4104	-108.442	-51.7247	48.3716	-146.53 , 43.08	0.2849	-179.196
cg18503793	22	TEF	N	-162.081	27.4696	-215.92 , -108.24	3.63e-09	69.0452	55.7013	-40.13 , 178.22	0.2151	-142.599	-0.64232	16.6101	-33.2 , 31.91	0.9692	-99.6037	20.4176	88.9766	-153.98 , 194.81	0.8185	-112.597
cg08101036	7	HOXA3	N	56.7032	9.61124	37.87 , 75.54	3.64e-09	125.777	57.4213	13.23 , 238.32	0.02849	121.817	3.91427	14.0045	-23.53 , 31.36	0.7799	-93.0969	-81.2057	148.867	-372.98 , 210.57	0.5854	-243.212
cg04983687	16	ZFPM1	N	-48.808	8.27894	-65.03 , -32.58	3.74e-09	1.745	9.62726	-17.12 , 20.61	0.8562	-103.575	-0.89696	2.9292	-6.64 , 4.84	0.7594	-98.1623	13.2496	32.0768	-49.62 , 76.12	0.6796	-127.146
cg12801067	12	LOC728084	N	-69.7206	11.8327	-92.91 , -46.53	3.81e-09	-2.14777	20.9531	-43.22 , 38.92	0.9184	-96.9195	-5.27468	7.98166	-20.92 , 10.37	0.5087	-92.4345	67.0919	50.0955	-31.1 , 165.28	0.1805	-196.23
cg00227665	16	KLHDC4	N	47.5984	8.08063	31.76 , 63.44	3.85e-09	-26.0542	12.751	-51.05 , -1.06	0.04102	-154.738	-0.84561	7.96804	-16.46 , 14.77	0.9155	-101.777	-57.4252	63.8707	-182.61 , 67.76	0.3686	-220.645
cg20359445	12	IKZF4	N	73.0825	12.4092	48.76 , 97.4	3.88e-09	132.936	34.7407	64.84 , 201.03	0.00013	81.8984	-1.65158	7.51385	-16.38 , 13.08	0.826	-102.26	-1.32475	48.1677	-95.73 , 93.08	0.9781	-101.813
cg14161821	9	KDM4C	N	-44.8507	7.6257	-59.8 , -29.9	4.07e-09	-8.84126	13.1783	-34.67 , 16.99	0.5023	-80.2874	0.07139	5.33049	-10.38 , 10.52	0.9893	-100.159	-8.62184	23.1914	-54.08 , 36.83	0.7101	-80.7766
cg20012601	4	MAML3	N	67.1802	11.4243	44.79 , 89.57	4.09e-09	41.4074	18.3087	5.52 , 77.29	0.02372	-38.3637	5.4698	7.3651	-8.97 , 19.91	0.4577	-91.858	2.07573	29.0437	-54.85 , 59	0.943	-96.9102
cg05648303	4	SCOC	N	-38.7293	6.58712	-51.64 , -25.82	4.11e-09	13.9064	21.4557	-28.15 , 55.96	0.5169	-135.907	22.3235	33.5269	-43.39 , 88.04	0.5055	-157.64	47.0115	39.7013	-30.8 , 124.83	0.2364	-221.385
cg21926626	8	TSNARE1	N	-43.9198	7.47311	-58.57 , -29.27	4.18e-09	-4.18852	15.0895	-33.76 , 25.39	0.7813	-90.4632	-3.02044	5.29093	-13.39 , 7.35	0.5681	-93.1228	19.3709	26.1998	-31.98 , 70.72	0.4597	-144.105
cg03573390	16	PLLP	N	43.9189	7.47341	29.27 , 58.57	4.19e-09	-9.27957	17.9509	-44.46 , 25.9	0.6052	-121.129	-11.648	20.6304	-52.08 , 28.79	0.5723	-126.522	6.66397	31.3929	-54.87 , 68.19	0.8319	-84.8266
cg22962123	7	HOXA3	N	50.7613	8.63842	33.83 , 67.69	4.2e-09	4.93788	24.4422	-42.97 , 52.84	0.8399	-90.2723	5.06451	10.7941	-16.09 , 26.22	0.6389	-90.0229	36.437	102.342	-164.15 , 237.03	0.7218	-28.2189
cg21690489	11	CREB3L1	N	-116.508	19.8307	-155.38 , -77.64	4.23e-09	1.7427	42.4854	-81.53 , 85.01	0.9673	-101.496	-28.1479	57.7859	-141.41 , 85.11	0.6262	-75.8403	-58.4968	64.6653	-185.24 , 68.25	0.3657	-49.7914
cg01264106	22	LGALS1	N	-67.952	11.5672	-90.62 , -45.28	4.24e-09	28.1696	23.2249	-17.35 , 73.69	0.2252	-141.455	2.80615	5.64556	-8.26 , 13.87	0.6192	-104.13	-48.3803	36.8417	-120.59 , 23.83	0.1891	-28.8022
cg24707200	1	NTRK1	N	-101.574	17.2927	-135.47 , -67.68	4.26e-09	50.2794	27.8551	-4.32 , 104.88	0.07107	-149.5	4.44127	9.74414	-14.66 , 23.54	0.6485	-104.372	-77.076	48.695	-172.52 , 18.37	0.1135	-24.1182
cg19449917	3	LINC00880	N	-75.7058	12.8915	-100.97 , -50.44	4.29e-09	10.7457	13.3183	-15.36 , 36.85	0.4198	-114.194	-0.44107	5.44679	-11.12 , 10.23	0.9355	-99.4174	-2.13346	26.7308	-54.53 , 50.26	0.9364	-97.1819
cg02355304	7	FBXL18	N	52.4424	8.93525	34.93 , 69.96	4.38e-09	-24.3757	16.1781	-56.08 , 7.33	0.1319	-146.481	-1.28665	5.58846	-12.24 , 9.67	0.8179	-102.453	-27.9678	26.5405	-79.99 , 24.05	0.292	-153.331
cg12149606	14	TMED10	N	48.4396	8.25522	32.26 , 64.62	4.42e-09	2.72624	11.961	-20.72 , 26.17	0.8197	-94.3719	7.39275	4.09997	-0.64 , 15.43	0.07137	-84.7382	1.70009	21.4911	-40.42 , 43.82	0.9369	-96.4903
cg16323245	3	ZBTB20	N	-42.8511	7.30818	-57.18 , -28.53	4.53e-09	-4.45333	17.9919	-39.72 , 30.81	0.8045	-89.6074	6.87598	4.99243	-2.91 , 16.66	0.1684	-116.046	-4.47104	28.5885	-60.5 , 51.56	0.8757	-89.5661
cg17730048	17	PPY2P	N	60.4519	10.3118	40.24 , 80.66	4.56e-09	-16.239	23.1723	-61.66 , 29.18	0.4834	-126.863	-12.9198	9.36116	-31.27 , 5.43	0.1675	-121.372	3.64697	35.9625	-66.84 , 74.13	0.9192	-93.9672
cg00558749	1	NADK	N	70.1256	11.963	46.68 , 93.57	4.58e-09	22.9677	26.748	-29.46 , 75.39	0.3905	-67.2478	-7.87599	8.63474	-24.8 , 9.05	0.3617	-111.231	-61.8352	36.1309	-132.65 , 8.98	0.087	-188.178
cg04221117	10	CELF2	N	104.652	17.8531	69.66 , 139.64	4.58e-09	25.0005	36.1756	-45.9 , 95.9	0.4895	-76.1107	19.6154	55.1333	-88.45 , 127.68	0.722	-81.2565	52.6681	61.3349	-67.55 , 172.88	0.3905	-49.6729
cg13065228	8	FOXH1	N	-32.2475	5.50184	-43.03 , -21.46	4.6e-09	-34.8727	10.3202	-55.1 , -14.65	0.0007273	8.1407	-4.31108	4.67178	-13.47 , 4.85	0.3561	-86.6313	-23.8588	18.2687	-59.67 , 11.95	0.1916	-26.0136
cg08549335	7	ZNRF2	N	-44.2293	7.54924	-59.03 , -29.43	4.66e-09	3.02247	13.3841	-23.21 , 29.26	0.8213	-106.834	-6.45107	4.68236	-15.63 , 2.73	0.1683	-85.4145	-13.2167	19.2249	-50.9 , 24.46	0.4918	-70.1179
cg03335624	5	ENC1	N	-58.834	10.0427	-78.52 , -39.15	4.68e-09	42.4296	18.1922	6.77 , 78.09	0.01968	-172.118	1.05279	5.25987	-9.26 , 11.36	0.8414	-101.789	29.6221	22.752	-14.97 , 74.22	0.1929	-150.349
cg00873678	14	CCDC88C	N	42.7594	7.29922	28.45 , 57.07	4.68e-09	-3.06962	19.4613	-41.21 , 35.07	0.8747	-107.179	-0.24978	6.11859	-12.24 , 11.74	0.9674	-100.584	91.1585	72.0539	-50.07 , 232.38	0.2058	113.19
cg24318728	17	KRT36	N	-51.0375	8.71388	-68.12 , -33.96	4.71e-09	20.7548	20.6747	-19.77 , 61.28	0.3154	-140.666	2.00946	5.58019	-8.93 , 12.95	0.7188	-103.937	30.1785	29.4476	-27.54 , 87.9	0.3054	-159.13
cg09076584	17	SPAG5-AS1	N	76.1788	13.0246	50.65 , 101.71	4.95e-09	-12.7471	22.5347	-56.92 , 31.42	0.5716	-116.733	-4.94355	10.6264	-25.77 , 15.88	0.6418	-106.489	-16.3722	53.6782	-121.58 , 88.84	0.7604	-121.492
cg05901196	10	CCDC6	N	59.427	10.1716	39.49 , 79.36	5.14e-09	15.8772	20.1181	-23.55 , 55.31	0.43	-73.2828	5.08225	5.75604	-6.2 , 16.36	0.3773	-91.4479	4.40037	48.1767	-90.03 , 98.83	0.9272	-92.5953
cg09113483	1	NFIA	N	29.5182	5.05243	19.62 , 39.42	5.15e-09	16.6263	9.1768	-1.36 , 34.61	0.07002	-43.6743	-0.20848	3.45758	-6.99 , 6.57	0.9519	-100.706	5.98899	16.8404	-27.02 , 39	0.7221	-79.7109
cg18598117	19	ARID3A	N	-46.422	7.94575	-62 , -30.85	5.15e-09	-16.9638	9.54391	-35.67 , 1.74	0.07549	-63.4575	0.3941	3.06885	-5.62 , 6.41	0.8978	-100.849	19.5703	21.4991	-22.57 , 61.71	0.3627	-142.157
cg25488206	22	RBFOX2	N	-115.846	19.8364	-154.72 , -76.97	5.22e-09	35.7863	37.7899	-38.28 , 109.85	0.3436	-130.891	7.47304	9.9884	-12.1 , 27.05	0.4544	-106.451	4.80467	54.4299	-101.88 , 111.49	0.9297	-104.147
cg22117819	22	LINC00895	N	-74.4011	12.7407	-99.37 , -49.43	5.23e-09	29.4704	18.3881	-6.57 , 65.51	0.109	-139.61	5.44284	10.5293	-15.19 , 26.08	0.6052	-107.316	32.7547	41.071	-47.74 , 113.25	0.4252	-144.024
cg01894038	11	NDUFC2-KCTD14	N	-69.141	11.8421	-92.35 , -45.93	5.26e-09	-1.00582	16.601	-33.54 , 31.53	0.9517	-98.5453	5.25431	6.65604	-7.79 , 18.3	0.4299	-107.599	36.0525	30.1924	-23.12 , 95.23	0.2324	-152.143
cg22452230	15	DRAIC	N	-58.3308	9.99133	-77.91 , -38.75	5.28e-09	14.2836	18.1326	-21.26 , 49.82	0.4309	-124.487	-0.95274	5.39981	-11.54 , 9.63	0.8599	-98.3667	-58.0479	25.9478	-108.91 , -7.19	0.02528	-0.48501
cg13472584	1	PRDM2	N	-61.1892	10.4825	-81.73 , -40.64	5.31e-09	-22.4176	26.6087	-74.57 , 29.74	0.3995	-63.3635	-53.1791	37.2917	-126.27 , 19.91	0.1539	-13.0907	-23.8874	36.8813	-96.17 , 48.4	0.5172	-60.9614
cg09119776	10	SUFU	N	54.7314	9.37928	36.35 , 73.11	5.37e-09	34.8408	20.942	-6.21 , 75.89	0.09618	-36.3422	-4.88816	7.1653	-18.93 , 9.16	0.4951	-108.931	-83.0118	38.0435	-157.58 , -8.45	0.02911	-251.671
cg23415434	2	ARHGEF4	N	46.1897	7.91574	30.67 , 61.7	5.37e-09	-4.76418	15.1647	-34.49 , 24.96	0.7534	-110.314	0.47413	3.45015	-6.29 , 7.24	0.8907	-98.9735	-7.18342	19.9474	-46.28 , 31.91	0.7188	-115.552
cg08474929	11	UPK2	N	117.047	20.0675	77.71 , 156.38	5.46e-09	-41.867	31.1068	-102.84 , 19.1	0.1783	-135.769	-23.5629	12.2973	-47.67 , 0.54	0.05535	-120.131	-59.3234	56.4691	-170 , 51.36	0.2935	-150.683
cg23883632	14	MAP3K9	N	-45.4953	7.80301	-60.79 , -30.2	5.53e-09	7.22532	11.8271	-15.96 , 30.41	0.5413	-115.881	2.67615	5.0486	-7.22 , 12.57	0.5961	-105.882	5.25921	19.66	-33.27 , 43.79	0.7891	-111.56
cg05208050	2	MOGS	N	-103.542	17.7585	-138.35 , -68.74	5.53e-09	-7.89597	25.3345	-57.55 , 41.76	0.7553	-92.3741	-10.0408	12.0675	-33.69 , 13.61	0.4054	-90.3027	33.0971	68.8781	-101.9 , 168.1	0.6309	-131.965
cg24173182	17	HIC1	N	-39.8366	6.83379	-53.23 , -26.44	5.56e-09	-52.8316	13.9415	-80.16 , -25.51	0.0001509	32.6207	-10.7725	4.07505	-18.76 , -2.79	0.008205	-72.9584	-32.236	26.1185	-83.43 , 18.96	0.2171	-19.0794
cg20784591	7	PILRA	N	121.962	20.9283	80.94 , 162.98	5.62e-09	61.9952	36.5354	-9.61 , 133.6	0.08972	-49.1685	-8.19464	11.263	-30.27 , 13.88	0.4669	-106.719	-48.6367	51.4629	-149.5 , 52.23	0.3446	-139.878
cg22149555	12	GOLGA3	N	45.4038	7.79207	30.13 , 60.68	5.65e-09	5.5786	14.8646	-23.56 , 34.71	0.7074	-87.7134	6.25899	6.01884	-5.54 , 18.06	0.2984	-86.2148	-14.8181	22.3071	-58.54 , 28.9	0.5065	-132.636
cg04945379	16	CIITA	N	-82.3225	14.1368	-110.03 , -54.61	5.77e-09	3.27407	20.47	-36.85 , 43.4	0.8729	-103.977	14.9873	8.00262	-0.7 , 30.67	0.0611	-118.206	-28.0258	39.7509	-105.94 , 49.89	0.4808	-65.9561
cg19863740	22	PARVG	N	-78.4339	13.4764	-104.85 , -52.02	5.88e-09	-9.86702	23.3504	-55.63 , 35.9	0.6726	-87.42	16.8302	9.2863	-1.37 , 35.03	0.06993	-121.458	22.3093	49.7272	-75.16 , 119.77	0.6537	-128.443
cg07211044	8	TOX	N	-38.1791	6.56047	-51.04 , -25.32	5.9e-09	-31.944	10.8495	-53.21 , -10.68	0.003237	-16.3312	-3.85152	3.64053	-10.99 , 3.28	0.2901	-89.912	-30.1975	18.2439	-65.96 , 5.56	0.09788	-20.9058
cg09340403	6	TNFAIP3	N	-44.8128	7.70273	-59.91 , -29.72	5.96e-09	-5.78271	13.9792	-33.18 , 21.62	0.6791	-87.0959	-3.89328	4.76437	-13.23 , 5.44	0.4138	-91.3121	-28.4579	25.6402	-78.71 , 21.8	0.267	-36.4961
cg01490733	1	SKI	N	108.134	18.5873	71.7 , 144.57	5.97e-09	29.3483	38.2123	-45.55 , 104.24	0.4425	-72.8594	-11.2733	11.2327	-33.29 , 10.74	0.3156	-110.425	41.1339	45.1	-47.26 , 129.53	0.3617	-61.9604
cg01307174	3	ARPP21	N	-51.4393	8.84488	-68.78 , -34.1	6.04e-09	-36.1254	14.775	-65.08 , -7.17	0.01448	-29.7708	-3.3763	6.1537	-15.44 , 8.68	0.5832	-93.4363	-48.7209	27.0614	-101.76 , 4.32	0.0718	-5.28473
cg18716210	11	MRPL23-AS1	N	53.2932	9.16403	35.33 , 71.25	6.05e-09	0.4006	17.8221	-34.53 , 35.33	0.9821	-99.2483	-1.24094	8.734	-18.36 , 15.88	0.887	-102.329	41.254	61.6927	-79.66 , 162.17	0.5037	-22.5904
cg23999170	1	TSPAN2	N	-50.9133	8.75547	-68.07 , -33.75	6.06e-09	0.59073	15.4145	-29.62 , 30.8	0.9694	-101.16	5.56065	6.26396	-6.72 , 17.84	0.3747	-110.922	-47.0128	31.1353	-108.04 , 14.01	0.1311	-7.66111
cg19869443	1	SAMD13	N	-56.6696	9.74642	-75.77 , -37.57	6.09e-09	-8.80473	21.2813	-50.52 , 32.91	0.6791	-84.4631	-4.62845	6.01781	-16.42 , 7.17	0.4418	-91.8326	49.1567	31.6877	-12.95 , 111.26	0.1208	-186.742
cg05593411	5	PDE4D	N	76.7076	13.1975	50.84 , 102.57	6.16e-09	34.3985	21.9404	-8.6 , 77.4	0.1169	-55.1563	7.14147	5.04293	-2.74 , 17.03	0.1567	-90.69	19.816	29.2442	-37.5 , 77.13	0.498	-74.1668
cg11294761	17	CD7	N	96.0763	16.5295	63.68 , 128.47	6.16e-09	7.03309	42.9727	-77.19 , 91.26	0.87	-92.6797	-18.3755	11.3568	-40.63 , 3.88	0.1057	-119.126	-56.5914	49.49	-153.59 , 40.41	0.2528	-158.903
cg08217545	19	NFIC	N	-48.4135	8.3404	-64.76 , -32.07	6.45e-09	-22.9708	23.9735	-69.96 , 24.02	0.338	-52.553	3.94523	7.66042	-11.07 , 18.96	0.6065	-108.149	-38.1842	28.8604	-94.75 , 18.38	0.1858	-21.1291
cg26828842	18	SOCS6	N	-55.3044	9.52955	-73.98 , -36.63	6.5e-09	30.2582	15.5944	-0.31 , 60.82	0.05234	-154.712	1.38255	4.61509	-7.66 , 10.43	0.7645	-102.5	12.105	34.1493	-54.83 , 79.04	0.723	-121.888
cg22925751	12	LOC643339	N	-67.2418	11.5927	-89.96 , -44.52	6.62e-09	-15.0566	19.5167	-53.31 , 23.2	0.4404	-77.6083	-11.7873	8.55385	-28.55 , 4.98	0.1682	-82.4703	-33.426	41.3357	-114.44 , 47.59	0.4187	-50.2898
cg06072822	13	MCF2L	N	100.592	17.3428	66.6 , 134.58	6.62e-09	16.3234	34.838	-51.96 , 84.61	0.6394	-83.7726	10.1607	6.33984	-2.27 , 22.59	0.109	-89.8991	7.53768	41.4271	-73.66 , 88.73	0.8556	-92.5066
cg27659768	16	ZNF19	N	-49.1762	8.47952	-65.8 , -32.56	6.66e-09	8.79778	14.7849	-20.18 , 37.78	0.5518	-117.89	2.56945	5.52428	-8.26 , 13.4	0.6418	-105.225	-33.9166	28.7598	-90.29 , 22.45	0.2383	-31.0304
cg07248377	16	MGRN1	N	64.2809	11.0878	42.55 , 86.01	6.73e-09	-8.30942	20.0056	-47.52 , 30.9	0.6779	-112.927	1.85749	6.13243	-10.16 , 13.88	0.762	-97.1104	-15.2627	35.6132	-85.06 , 54.54	0.6682	-123.744
cg02640173	2	GLI2	Y	-44.4126	7.66291	-59.43 , -29.39	6.8e-09	-43.7349	15.225	-73.58 , -13.89	0.004072	-1.5261	-52.4436	15.432	-82.69 , -22.2	0.0006779	18.0826	-149.027	42.4037	-232.14 , -65.92	0.0004406	235.551
cg08756594	11	LSP1	N	85.4651	14.7499	56.56 , 114.37	6.86e-09	12.0241	29.7005	-46.19 , 70.24	0.6856	-85.931	-30.0681	33.5988	-95.92 , 35.79	0.3708	-135.182	-55.7142	46.5638	-146.98 , 35.55	0.2315	-165.189
cg00831931	10	TCF7L2	N	-93.7156	16.1858	-125.44 , -61.99	7.04e-09	-65.3871	32.6133	-129.31 , -1.47	0.04497	-30.2281	-14.0032	11.2745	-36.1 , 8.09	0.2142	-85.0578	12.2235	82.1794	-148.85 , 173.3	0.8818	-113.043
cg07177115	2	IL36A	N	-92.3302	15.9561	-123.6 , -61.06	7.19e-09	-20.7973	27.2253	-74.16 , 32.56	0.4449	-77.4751	-17.0397	8.00689	-32.73 , -1.35	0.03333	-81.5448	-10.1059	51.3252	-110.7 , 90.49	0.8439	-89.0546
cg17292662	8	ATP6V1H	N	-64.1458	11.0896	-85.88 , -42.41	7.28e-09	-4.36382	15.7782	-35.29 , 26.56	0.7821	-93.197	0.78306	5.25798	-9.52 , 11.09	0.8816	-101.221	4.02931	28.3062	-51.45 , 59.51	0.8868	-106.281
cg19935065	10	DNTT	N	-67.9009	11.7444	-90.92 , -44.88	7.4e-09	16.6016	11.8656	-6.66 , 39.86	0.1618	-124.45	-1.54107	4.18686	-9.75 , 6.67	0.7128	-97.7304	-19.0707	25.8704	-69.78 , 31.64	0.461	-71.914
cg00533407	7	ASIC3	N	-61.3961	10.6192	-82.21 , -40.58	7.4e-09	-4.06736	16.2074	-35.83 , 27.7	0.8018	-93.3752	1.37012	9.06879	-16.4 , 19.14	0.8799	-102.232	-17.1392	44.5357	-104.43 , 70.15	0.7004	-72.0843
cg04933530	14	IRF2BPL	N	-68.8462	11.9158	-92.2 , -45.49	7.57e-09	-13.4139	17.1167	-46.96 , 20.13	0.4332	-80.5161	-11.0508	5.99511	-22.8 , 0.7	0.06528	-83.9486	6.07856	54.9545	-101.63 , 113.79	0.9119	-108.829
cg03469471	7	NOS3	N	104.352	18.0648	68.94 , 139.76	7.63e-09	24.7879	32.5993	-39.11 , 88.68	0.447	-76.2459	5.6946	5.63629	-5.35 , 16.74	0.3123	-94.5429	32.044	43.6969	-53.6 , 117.69	0.4634	-69.2924
cg02997316	1	LMNA	N	-125.859	21.7899	-168.57 , -83.15	7.65e-09	64.5539	41.7869	-17.35 , 146.46	0.1224	-151.291	9.1606	10.1941	-10.82 , 29.14	0.3689	-107.278	-34.908	60.3078	-153.11 , 83.3	0.5627	-72.2642
cg12655416	17	ORMDL3	N	98.917	17.126	65.35 , 132.48	7.66e-09	112.668	30.4798	52.93 , 172.41	0.0002186	13.9011	-2.44015	7.72782	-17.59 , 12.71	0.7522	-102.467	-0.96411	40.5365	-80.42 , 78.49	0.981	-100.975
cg09187007	1	MEGF6	N	46.5875	8.06834	30.77 , 62.4	7.74e-09	-1.94778	10.6316	-22.79 , 18.89	0.8546	-104.181	5.30546	3.59299	-1.74 , 12.35	0.1398	-88.6118	18.4915	21.0027	-22.67 , 59.66	0.3786	-60.3081
cg27485596	13	ARHGEF7	N	-34.5435	5.98279	-46.27 , -22.82	7.75e-09	-63.7748	29.0282	-120.67 , -6.88	0.02802	84.622	15.8504	34.7238	-52.21 , 83.91	0.6481	-145.885	12.7741	44.5588	-74.56 , 100.11	0.7744	-136.98
cg20236995	1	PRDM16	N	91.6046	15.8708	60.5 , 122.71	7.84e-09	-46.3327	41.1565	-127 , 34.33	0.2603	-150.579	-5.39935	43.7549	-91.16 , 80.36	0.9018	-105.894	-26.8909	53.3471	-131.45 , 77.67	0.6142	-129.355
cg05294455	17	MYL4	N	62.5696	10.8424	41.32 , 83.82	7.89e-09	43.7537	24.1689	-3.62 , 91.12	0.07024	-30.0719	13.1101	8.03293	-2.63 , 28.85	0.1027	-79.0471	-13.4363	50.0472	-111.53 , 84.66	0.7883	-121.474
cg10576725	14	MMP14	N	-80.7077	13.9899	-108.13 , -53.29	7.97e-09	-16.1792	29.9441	-74.87 , 42.51	0.589	-79.9534	10.2804	11.568	-12.39 , 32.95	0.3742	-112.738	-8.90318	76.8285	-159.49 , 141.68	0.9077	-88.9686
cg26906737	1	TMEM206	N	-72.3043	12.5347	-96.87 , -47.74	8.01e-09	44.0458	23.5313	-2.08 , 90.17	0.06123	-160.917	1.11141	9.70645	-17.91 , 20.14	0.9088	-101.537	-1.43622	46.5796	-92.73 , 89.86	0.9754	-98.0136
cg00253658	16	FTO	N	-32.7123	5.67468	-43.83 , -21.59	8.19e-09	-47.7161	10.6799	-68.65 , -26.78	7.902e-06	45.8657	-4.65434	3.97018	-12.44 , 3.13	0.2411	-85.7719	-45.1399	14.6137	-73.78 , -16.5	0.002009	37.9905
cg04454050	6	TREML1	N	-98.2981	17.0563	-131.73 , -64.87	8.26e-09	20.4947	38.9555	-55.86 , 96.85	0.5988	-120.85	-12.9913	8.89917	-30.43 , 4.45	0.1443	-86.7837	32.4179	60.2328	-85.64 , 150.47	0.5904	-132.979
cg08571918	2	LINC01114	N	45.9685	7.9804	30.33 , 61.61	8.4e-09	1.97091	14.4293	-26.31 , 30.25	0.8914	-95.7125	46.1269	21.0561	4.86 , 87.4	0.02848	0.344562	-27.9447	27.7458	-82.33 , 26.44	0.3139	-160.791
cg08362785	22	MKL1	N	80.3487	13.9492	53.01 , 107.69	8.41e-09	-42.4388	34.6861	-110.42 , 25.55	0.2211	-152.818	4.88694	12.718	-20.04 , 29.81	0.7008	-93.9178	-52.4726	49.3852	-149.27 , 44.32	0.288	-165.306
cg16723994	17	BZRAP1	N	69.3679	12.0446	45.76 , 92.98	8.45e-09	13.5606	16.4238	-18.63 , 45.75	0.409	-80.4512	-1.35429	9.69776	-20.36 , 17.65	0.8889	-101.952	32.3949	42.3911	-50.69 , 115.48	0.4448	-53.2999
cg08857310	17	LOC100507351	N	-143.886	24.9953	-192.88 , -94.9	8.59e-09	-37.2077	47.2375	-129.79 , 55.38	0.4309	-74.1409	-12.7586	12.2598	-36.79 , 11.27	0.298	-91.1328	-53.6645	71.9741	-194.73 , 87.4	0.4559	-62.7036
cg13563026	4	ATP10D	N	-54.9842	9.55957	-73.72 , -36.25	8.83e-09	30.4004	20.0897	-8.98 , 69.78	0.1302	-155.289	8.03576	7.26902	-6.21 , 22.28	0.269	-114.615	-41.2428	36.0605	-111.92 , 29.44	0.2527	-24.9916
cg08818716	7	RADIL	N	90.793	15.796	59.83 , 121.75	9.04e-09	55.1158	32.3462	-8.28 , 118.51	0.08839	-39.2951	-11.9003	36.328	-83.1 , 59.3	0.7432	-113.107	-21.4612	39.1676	-98.23 , 55.31	0.5837	-123.638
cg24953596	1	MEGF6	N	57.2976	9.9691	37.76 , 76.84	9.06e-09	12.9695	11.8737	-10.3 , 36.24	0.2747	-77.3647	3.75946	4.87397	-5.79 , 13.31	0.4405	-93.4387	43.9329	25.2421	-5.54 , 93.41	0.08178	-23.325
cg21703988	12	EP400	N	52.1754	9.07794	34.38 , 69.97	9.06e-09	-3.99825	16.6321	-36.6 , 28.6	0.81	-107.663	-1.10144	5.9273	-12.72 , 10.52	0.8526	-102.111	-80.3408	51.1986	-180.69 , 20.01	0.1166	-253.982
cg09427944	16	ZNF688	N	134.721	23.4407	88.78 , 180.66	9.07e-09	-7.64941	39.2154	-84.51 , 69.21	0.8453	-105.678	95.425	76.6378	-54.78 , 245.64	0.2131	-29.1682	-10.4264	83.9877	-175.04 , 154.19	0.9012	-107.739
cg14827643	4	RGS12	N	64.3059	11.1907	42.37 , 86.24	9.12e-09	14.8285	20.5486	-25.45 , 55.1	0.4705	-76.9407	-12.0554	23.8773	-58.85 , 34.74	0.6136	-118.747	16.7824	50.505	-82.21 , 115.77	0.7397	-73.9022
cg04830471	19	CCDC155	N	-105.629	18.383	-141.66 , -69.6	9.14e-09	39.1635	30.6702	-20.95 , 99.28	0.2016	-137.076	1.65954	13.0171	-23.85 , 27.17	0.8986	-101.571	145.347	66.8044	14.41 , 276.28	0.02958	-237.601
cg10547908	15	FAM174B	N	87.9783	15.3131	57.96 , 117.99	9.18e-09	7.92317	25.3202	-41.7 , 57.55	0.7543	-90.9942	-7.67588	8.40462	-24.15 , 8.8	0.3611	-108.725	43.2324	65.1033	-84.37 , 170.83	0.5067	-50.8602
cg14975410	3	TNIK	N	-48.8355	8.50156	-65.5 , -32.17	9.23e-09	16.2039	14.6942	-12.6 , 45	0.2701	-133.181	-2.88725	6.32014	-15.27 , 9.5	0.6478	-94.0878	-6.60767	23.5951	-52.85 , 39.64	0.7794	-86.4695
cg06870470	19	DOCK6	N	-53.4742	9.31273	-71.73 , -35.22	9.35e-09	-36.5779	39.8252	-114.64 , 41.48	0.3584	-31.5971	6.72313	13.5385	-19.81 , 33.26	0.6195	-112.573	48.2423	63.6746	-76.56 , 173.04	0.4487	-190.216
cg26165146	12	ARNTL2	N	-53.0851	9.24641	-71.21 , -34.96	9.4e-09	16.849	12.6695	-7.98 , 41.68	0.1836	-131.74	-9.0273	5.49459	-19.8 , 1.74	0.1004	-82.9946	-31.1839	35.7129	-101.18 , 38.81	0.3826	-41.2568
cg02431260	11	ESAM	N	76.7364	13.3778	50.52 , 102.96	9.69e-09	12.9673	16.3016	-18.98 , 44.92	0.4263	-83.1015	20.0842	18.6542	-16.48 , 56.65	0.2816	-73.827	24.6723	19.7955	-14.13 , 63.47	0.2126	-67.848
cg23364711	13	COL4A1	N	-44.3537	7.73355	-59.51 , -29.2	9.74e-09	-15.6449	12.4449	-40.04 , 8.75	0.2087	-64.7269	-4.76108	4.57471	-13.73 , 4.21	0.298	-89.2657	-10.0707	21.6095	-52.43 , 32.28	0.6412	-77.2946
cg23684410	11	SIK3	N	-55.1079	9.61212	-73.95 , -36.27	9.86e-09	11.274	16.6866	-21.43 , 43.98	0.4993	-120.458	-1.16155	5.17117	-11.3 , 8.97	0.8223	-97.8922	-45.8736	29.5704	-103.83 , 12.08	0.1208	-16.7567
cg03444940	16	TSC2	N	54.5666	9.51884	35.91 , 73.22	9.9e-09	19.8652	13.4798	-6.56 , 46.29	0.1406	-63.5946	1.24354	7.00818	-12.49 , 14.98	0.8592	-97.7211	2.61787	40.8208	-77.39 , 82.63	0.9489	-95.2024
cg21601493	13	IRS2	N	94.4239	16.4796	62.12 , 126.72	1.01e-08	43.1099	30.6664	-17 , 103.22	0.1598	-54.3443	-2.06329	12.9798	-27.5 , 23.38	0.8737	-102.185	-51.3254	54.2875	-157.73 , 55.08	0.3444	-154.356
cg08250921	16	BANP	N	47.2129	8.24059	31.06 , 63.36	1.01e-08	8.06499	12.4531	-16.34 , 32.47	0.5172	-82.9178	-0.36038	5.47789	-11.1 , 10.38	0.9475	-100.763	-11.0189	32.5735	-74.86 , 52.83	0.7352	-123.339
cg08530838	5	TRIM36	N	82.8217	14.4647	54.47 , 111.17	1.03e-08	-21.1282	17.9708	-56.35 , 14.09	0.2397	-125.51	18.3655	7.94439	2.79 , 33.94	0.02079	-77.8253	-4.53784	24.3715	-52.31 , 43.23	0.8523	-105.479
cg24727480	12	KCTD10	N	67.4851	11.7854	44.39 , 90.58	1.03e-08	-18.2958	31.5682	-80.17 , 43.58	0.5622	-127.111	6.40596	9.85484	-12.91 , 25.72	0.5157	-90.5076	-35.1859	50.8321	-134.82 , 64.45	0.4888	-152.139
cg07565551	2	OSBPL6	N	-69.462	12.1347	-93.25 , -45.68	1.04e-08	-32.2855	21.4081	-74.25 , 9.67	0.1315	-53.5207	2.42127	7.83479	-12.93 , 17.78	0.7573	-103.486	1.54112	36.698	-70.39 , 73.47	0.9665	-102.219
cg07970325	6	PRDM1	N	-68.1571	11.907	-91.49 , -44.82	1.04e-08	-24.5559	18.0709	-59.97 , 10.86	0.1742	-63.9716	-0.17055	8.68078	-17.18 , 16.84	0.9843	-99.7498	-34.4622	48.2731	-129.08 , 60.15	0.4753	-49.4371
cg12341429	2	TANK	N	-92.1574	16.1035	-123.72 , -60.59	1.05e-08	-26.2488	27.4813	-80.11 , 27.61	0.3395	-71.5174	16.6292	9.88415	-2.74 , 36	0.09249	-118.044	-27.6369	49.7335	-125.11 , 69.84	0.5784	-70.0111
cg05141333	8	PLEC	N	102.51	17.9262	67.37 , 137.65	1.08e-08	20.8594	31.7786	-41.43 , 83.15	0.5116	-79.6514	-7.37984	9.19328	-25.4 , 10.64	0.4221	-107.199	64.7027	101.75	-134.73 , 264.13	0.5248	-36.8816
cg21221712	15	AKAP13	N	-74.3315	13.0053	-99.82 , -48.84	1.09e-08	-2.85557	20.7894	-43.6 , 37.89	0.8907	-96.1583	1.66755	6.70339	-11.47 , 14.81	0.8035	-102.243	-10.5656	48.5273	-105.68 , 84.55	0.8276	-85.7858
cg12050271	1	LINC00982	N	39.6802	6.94274	26.07 , 53.29	1.1e-08	1.52217	28.2293	-53.81 , 56.85	0.957	-96.1639	87.1063	38.3627	11.92 , 162.3	0.02317	119.521	-211.5	120.116	-446.93 , 23.93	0.07827	-633.012
cg23369670	14	XRCC3	N	56.1674	9.83216	36.9 , 75.44	1.11e-08	7.3098	15.7109	-23.48 , 38.1	0.6417	-86.9857	-4.92954	5.47713	-15.66 , 5.81	0.3681	-108.777	11.1244	36.4158	-60.25 , 82.5	0.76	-80.1943
cg07102001	16	KLHDC4	N	61.1833	10.711	40.19 , 82.18	1.12e-08	-10.0516	24.2892	-57.66 , 37.56	0.679	-116.429	-8.26563	12.9128	-33.57 , 17.04	0.5221	-113.51	-9.78656	51.2885	-110.31 , 90.74	0.8487	-115.995
cg06685437	17	RAI1	N	64.2837	11.2611	42.21 , 86.36	1.14e-08	7.14734	20.1281	-32.3 , 46.6	0.7225	-88.8816	10.5291	7.8386	-4.83 , 25.89	0.1792	-83.6209	41.4183	52.3605	-61.21 , 144.04	0.4289	-35.5695
cg18033092	11	C11orf49	N	-61.0317	10.693	-81.99 , -40.07	1.15e-08	-26.8034	19.521	-65.06 , 11.46	0.1697	-56.0827	4.73957	7.66422	-10.28 , 19.76	0.5363	-107.766	-21.6864	39.3001	-98.71 , 55.34	0.5811	-64.467
cg25963412	4	ACOX3	N	50.1938	8.79449	32.96 , 67.43	1.15e-08	11.3499	15.6793	-19.38 , 42.08	0.4691	-77.3878	-5.12161	4.92529	-14.78 , 4.53	0.2984	-110.204	27.5744	36.1942	-43.37 , 98.51	0.4462	-45.0642
cg09109520	16	ADGRG1	N	72.6321	12.731	47.68 , 97.58	1.16e-08	13.8173	27.0777	-39.25 , 66.89	0.6099	-80.9763	5.88139	4.96695	-3.85 , 15.62	0.2364	-91.9025	-33.3888	26.2217	-84.78 , 18.01	0.2029	-145.97
cg04460609	4	LDB2	N	-51.2878	8.99075	-68.91 , -33.67	1.17e-08	30.1316	14.3985	1.91 , 58.35	0.03638	-158.75	5.13803	6.25774	-7.13 , 17.4	0.4116	-110.018	-1.1852	30.3546	-60.68 , 58.31	0.9689	-97.6891
cg12160087	12	CCDC64	N	67.0641	11.7572	44.02 , 90.11	1.17e-08	24.8345	18.1274	-10.7 , 60.36	0.1707	-62.969	6.03125	8.66225	-10.95 , 23.01	0.4863	-91.0067	-13.6217	37.4816	-87.09 , 59.84	0.7163	-120.311
cg19520763	3	ACVR2B	N	-58.5511	10.2705	-78.68 , -38.42	1.19e-08	42.0191	18.265	6.22 , 77.82	0.02142	-171.765	-7.21724	7.7407	-22.39 , 7.95	0.3511	-87.6736	-14.9087	35.816	-85.11 , 55.29	0.6772	-74.5373
cg02068356	1	ROR1	N	-81.1345	14.2325	-109.03 , -53.24	1.19e-08	-22.7928	21.5981	-65.13 , 19.54	0.2913	-71.9074	-53.2061	22.619	-97.54 , -8.87	0.01866	-34.4224	-22.8532	38.6049	-98.52 , 52.81	0.5539	-71.8329
cg04608933	11	KCNQ1	N	108.277	18.9997	71.04 , 145.52	1.21e-08	27.9931	29.2456	-29.33 , 85.31	0.3385	-74.1469	-7.40166	8.06857	-23.22 , 8.41	0.359	-106.836	-2.28446	47.5362	-95.46 , 90.89	0.9617	-102.11
cg14909179	11	CHID1	N	35.1231	6.16648	23.04 , 47.21	1.23e-08	27.6901	9.35786	9.35 , 46.03	0.003086	-21.1627	2.91625	3.49903	-3.94 , 9.77	0.4046	-91.6971	0.2231	20.4875	-39.93 , 40.38	0.9913	-99.3648
cg23387597	10	ITPRIP	N	79.5064	13.9608	52.14 , 106.87	1.23e-08	-9.23906	23.0682	-54.45 , 35.97	0.6888	-111.621	-16.0324	7.88469	-31.49 , -0.58	0.04202	-120.165	-64.1234	80.2039	-221.32 , 93.08	0.424	-180.652
cg06535156	6	TIAM2	N	87.9694	15.4531	57.68 , 118.26	1.25e-08	46.8012	28.6498	-9.35 , 102.95	0.1024	-46.7983	4.88599	7.9171	-10.63 , 20.4	0.5371	-94.4458	27.7071	39.2417	-49.21 , 104.62	0.4801	-68.5037
cg15513620	1	ZNF697	N	-89.1197	15.6555	-119.8 , -58.43	1.25e-08	60.2748	41.9953	-22.04 , 142.59	0.1512	-167.633	-6.29918	9.99281	-25.89 , 13.29	0.5285	-92.9318	-49.7928	56.763	-161.05 , 61.46	0.3804	-44.1282
cg05935520	5	CDH18	N	-60.9544	10.7109	-81.95 , -39.96	1.26e-08	42.1443	22.1725	-1.31 , 85.6	0.05734	-169.141	27.7935	28.2541	-27.58 , 83.17	0.3253	-145.597	36.2888	36.8618	-35.96 , 108.54	0.3249	-159.534
cg05894462	7	PTPRN2	N	55.4509	9.7517	36.34 , 74.56	1.3e-08	-23.0915	19.3971	-61.11 , 14.93	0.2339	-141.643	-10.9709	6.66372	-24.03 , 2.09	0.09969	-119.785	49.7955	43.9415	-36.33 , 135.92	0.2571	-10.1989
cg13995854	7	ST7	N	-42.5429	7.48804	-57.22 , -27.87	1.34e-08	-22.6575	15.3245	-52.69 , 7.38	0.1393	-46.742	14.8204	5.85831	3.34 , 26.3	0.01141	-134.836	51.5743	24.4158	3.72 , 99.43	0.03466	-221.229
cg16190225	7	C7orf50	N	61.1144	10.7569	40.03 , 82.2	1.34e-08	13.1168	22.5159	-31.01 , 57.25	0.5602	-78.5373	-0.77761	10.0989	-20.57 , 19.02	0.9386	-101.272	18.0664	38.5067	-57.41 , 93.54	0.6389	-70.4384
cg26709300	16	BOLA2	N	53.7803	9.46754	35.22 , 72.34	1.34e-08	0.13131	19.153	-37.41 , 37.67	0.9945	-99.7558	-8.48513	6.3123	-20.86 , 3.89	0.1789	-115.777	7.92711	34.5579	-59.81 , 75.66	0.8186	-85.2602
cg21684021	1	CELSR2	N	-69.018	12.153	-92.84 , -45.2	1.35e-08	14.1783	19.8908	-24.81 , 53.16	0.476	-120.543	-31.868	30.2395	-91.14 , 27.4	0.292	-53.8266	-30.7687	29.9693	-89.51 , 27.97	0.3046	-55.4194
cg01693350	11	WT1	N	-30.5876	5.38718	-41.15 , -20.03	1.36e-08	-3.60975	10.3948	-23.98 , 16.76	0.7284	-88.1986	0.70668	3.02312	-5.22 , 6.63	0.8152	-102.31	-41.3962	15.9012	-72.56 , -10.23	0.009232	35.3366
cg12593793	1	LMNA	N	-88.5538	15.5986	-119.13 , -57.98	1.37e-08	84.1207	28.8428	27.59 , 140.65	0.00354	-194.994	-5.97509	6.53381	-18.78 , 6.83	0.3605	-93.2526	23.9886	42.7222	-59.75 , 107.72	0.5745	-127.089
cg08471846	19	PTBP1	N	71.9835	12.6805	47.13 , 96.84	1.37e-08	62.3049	26.8773	9.63 , 114.98	0.02044	-13.4455	1.31506	5.47638	-9.42 , 12.05	0.8102	-98.1731	-47.3627	35.8757	-117.68 , 22.95	0.1868	-165.797
cg01619846	19	UHRF1	N	77.4053	13.6371	50.68 , 104.13	1.38e-08	65.1102	34.6574	-2.82 , 133.04	0.06029	-15.8841	4.06376	6.92076	-9.5 , 17.63	0.5571	-94.75	-51.8442	45.3906	-140.81 , 37.12	0.2534	-166.978
cg22386583	17	RPTOR	N	-44.0587	7.76491	-59.28 , -28.84	1.39e-08	-12.9364	12.1465	-36.74 , 10.87	0.2869	-70.6383	2.47962	5.44929	-8.2 , 13.16	0.6491	-105.628	7.2936	30.0339	-51.57 , 66.16	0.8081	-116.554
cg20865778	11	TCIRG1	N	88.7135	15.6319	58.07 , 119.35	1.39e-08	-0.72316	21.4103	-42.69 , 41.24	0.9731	-100.815	3.19696	8.44499	-13.36 , 19.75	0.705	-96.3963	-119.188	105.956	-326.86 , 88.49	0.2606	-234.352
cg02821342	7	LINC-PINT	N	-68.4487	12.0682	-92.1 , -44.8	1.41e-08	-3.89009	29.882	-62.46 , 54.68	0.8964	-94.3168	1.83738	11.3386	-20.39 , 24.06	0.8713	-102.684	-47.0922	58.3124	-161.38 , 67.2	0.4193	-31.2008
cg23663547	17	CCR7	N	73.7768	13.0065	48.28 , 99.27	1.41e-08	2.18102	35.7578	-67.9 , 72.27	0.9514	-97.0438	-6.64376	7.50325	-21.35 , 8.06	0.3759	-109.005	-4.66502	45.1747	-93.21 , 83.88	0.9178	-106.323
cg21609804	11	MARK2	N	77.3529	13.6392	50.62 , 104.09	1.42e-08	20.837	24.2352	-26.66 , 68.34	0.3899	-73.0624	-5.40557	8.17677	-21.43 , 10.62	0.5086	-106.988	-15.6925	52.1652	-117.94 , 86.55	0.7635	-120.287
cg19914554	17	CD7	N	83.052	14.6459	54.35 , 111.76	1.42e-08	18.7725	34.8325	-49.5 , 87.04	0.5899	-77.3966	-4.87065	10.9504	-26.33 , 16.59	0.6565	-105.865	18.8646	53.9258	-86.83 , 124.56	0.7265	-77.2858
cg01899318	16	ZNF19	N	-60.9526	10.7594	-82.04 , -39.86	1.47e-08	40.5	17.3903	6.42 , 74.59	0.01987	-166.445	2.91001	5.60382	-8.07 , 13.89	0.6036	-104.774	-37.5598	36.4309	-108.96 , 33.84	0.3025	-38.3787
cg15772924	12	HOXC4	Y	-51.312	9.05687	-69.06 , -33.56	1.47e-08	-38.8711	17.7412	-73.64 , -4.1	0.02845	-24.2457	-10.8198	4.97626	-20.57 , -1.07	0.02968	-78.9137	-45.7598	21.6973	-88.29 , -3.23	0.03494	-10.8205
cg15035133	22	CDC42EP1	N	-68.9115	12.1712	-92.77 , -45.06	1.5e-08	33.7182	25.2257	-15.72 , 83.16	0.1813	-148.93	13.2518	11.5556	-9.4 , 35.9	0.2515	-119.23	12.6014	45.1053	-75.8 , 101.01	0.78	-118.286
cg10665891	12	MAP1LC3B2	N	-32.0546	5.66652	-43.16 , -20.95	1.54e-08	-19.8332	10.5151	-40.44 , 0.78	0.05927	-38.1269	5.67175	13.5883	-20.96 , 32.3	0.6764	-117.694	-21.7437	18.281	-57.57 , 14.09	0.2343	-32.1668
cg11261850	11	LRRC32	N	62.3978	11.0295	40.78 , 84.02	1.54e-08	-19.4702	17.0399	-52.87 , 13.93	0.2532	-131.203	-5.38313	17.8648	-40.4 , 29.63	0.7632	-108.627	21.9379	25.7238	-28.48 , 72.36	0.3938	-64.8419
cg25399309	5	MAST4	N	64.9155	11.4793	42.42 , 87.42	1.56e-08	13.9043	18.3275	-22.02 , 49.83	0.4481	-78.5809	6.82948	6.73824	-6.38 , 20.04	0.3108	-89.4794	9.15589	27.225	-44.21 , 62.52	0.7366	-85.8957
cg07565042	11	RNF141	N	-62.7909	11.1053	-84.56 , -41.02	1.57e-08	14.8671	18.3065	-21.01 , 50.75	0.4167	-123.677	-2.36276	5.7549	-13.64 , 8.92	0.6814	-96.2371	1.91622	44.0142	-84.35 , 88.18	0.9653	-103.052
cg24746938	2	DOCK10	N	-62.5878	11.073	-84.29 , -40.88	1.58e-08	1.92489	16.8701	-31.14 , 34.99	0.9092	-103.076	-0.38795	6.46184	-13.05 , 12.28	0.9521	-99.3802	31.0143	28.4559	-24.76 , 86.79	0.2758	-149.553
cg07243202	8	NDRG1	N	-59.833	10.5878	-80.59 , -39.08	1.59e-08	12.155	15.1304	-17.5 , 41.81	0.4218	-120.315	5.1157	7.30284	-9.2 , 19.43	0.4836	-108.55	-13.3987	35.1121	-82.22 , 55.42	0.7028	-77.6066
cg06872313	12	ATF7IP	N	-61.7285	10.93	-83.15 , -40.31	1.63e-08	-32.4516	21.1472	-73.9 , 9	0.1249	-47.4285	-7.33581	7.01212	-21.08 , 6.41	0.2955	-88.116	6.65014	36.2144	-64.33 , 77.63	0.8543	-110.773
cg08422803	21	ITGB2	N	61.9374	10.9666	40.44 , 83.43	1.63e-08	20.9827	22.1175	-22.37 , 64.33	0.3428	-66.1227	4.91383	6.15956	-7.16 , 16.99	0.425	-92.0665	22.2049	40.4014	-56.98 , 101.39	0.5826	-64.1495
cg07702888	1	RHBG	N	-79.999	14.1675	-107.77 , -52.23	1.64e-08	-27.2312	29.1439	-84.35 , 29.89	0.3501	-65.9605	-3.55221	8.83083	-20.86 , 13.76	0.6875	-95.5597	-42.2654	40.3368	-121.33 , 36.79	0.2947	-47.1676
cg00205605	1	FAM213B	N	78.0988	13.8352	50.98 , 105.22	1.65e-08	-0.9773	24.9358	-49.85 , 47.9	0.9687	-101.251	1.22865	5.22546	-9.01 , 11.47	0.8141	-98.4268	-7.88819	35.5166	-77.5 , 61.72	0.8242	-110.1
cg05503887	11	EHF	N	-73.2429	12.977	-98.68 , -47.81	1.66e-08	6.40448	19.5553	-31.92 , 44.73	0.7433	-108.744	-9.43109	5.37285	-19.96 , 1.1	0.0792	-87.1235	34.7291	44.1175	-51.74 , 121.2	0.4312	-147.416
cg04554131	1	RUNX3	N	72.0155	12.7582	47.01 , 97.02	1.66e-08	2.03138	26.6494	-50.2 , 54.26	0.9392	-97.1792	-7.84347	7.03941	-21.64 , 5.95	0.2652	-110.891	35.444	31.2664	-25.84 , 96.73	0.257	-50.7829
cg00940560	8	MIR548O2	N	-54.226	9.61144	-73.06 , -35.39	1.68e-08	-22.2699	14.5549	-50.8 , 6.26	0.126	-58.9313	-1.02692	4.51617	-9.88 , 7.82	0.8201	-98.1062	-17.1057	21.2151	-58.69 , 24.48	0.4201	-68.4548
cg17470397	3	OPA1	N	-72.782	12.9009	-98.07 , -47.5	1.69e-08	21.432	18.7722	-15.36 , 58.23	0.2536	-129.447	4.40004	7.51117	-10.32 , 19.12	0.558	-106.046	52.1243	56.2043	-58.04 , 162.28	0.3537	-171.617
cg03543319	2	PROKR1	N	-66.2802	11.7571	-89.32 , -43.24	1.73e-08	-12.606	31.8362	-75.01 , 49.79	0.6921	-80.9807	5.20054	7.363	-9.23 , 19.63	0.48	-107.846	-20.9453	50.3387	-119.61 , 77.72	0.6773	-68.3989
cg02988730	1	AMPD2	N	70.8859	12.5836	46.22 , 95.55	1.77e-08	-31.3865	22.4117	-75.31 , 12.54	0.1614	-144.278	17.9975	8.1296	2.06 , 33.93	0.02684	-74.6106	-18.0962	50.6361	-117.34 , 81.15	0.7208	-125.529
cg20364632	6	CRISP2	N	-47.4547	8.42371	-63.97 , -30.94	1.77e-08	9.63088	26.5197	-42.35 , 61.61	0.7165	-120.295	9.60185	7.12511	-4.36 , 23.57	0.1778	-120.234	-18.0214	42.0008	-100.34 , 64.3	0.6679	-62.0239
cg14184907	12	LINC00936	N	-81.8163	14.5411	-110.32 , -53.32	1.84e-08	23.0118	32.861	-41.4 , 87.42	0.4838	-128.126	15.2225	55.3813	-93.32 , 123.77	0.7834	-118.606	-8.60603	58.1364	-122.55 , 105.34	0.8823	-89.4813
cg08817867	17	ALDH3A1	N	-57.44	10.2174	-77.47 , -37.41	1.89e-08	-50.5186	35.8534	-120.79 , 19.75	0.1588	-12.0498	-12.0272	9.5909	-30.83 , 6.77	0.2098	-79.0613	54.5742	47.9559	-39.42 , 148.57	0.2551	-195.011
cg16097041	1	FLAD1	N	53.8995	9.58734	35.11 , 72.69	1.89e-08	-3.49094	19.1384	-41 , 34.02	0.8553	-106.477	7.42692	6.82553	-5.95 , 20.8	0.2765	-86.2208	-23.4131	39.6095	-101.05 , 54.22	0.5545	-143.439
cg15031409	1	CASZ1	N	75.2902	13.3951	49.04 , 101.54	1.9e-08	16.6586	18.7487	-20.09 , 53.41	0.3743	-77.8742	-9.44523	10.175	-29.39 , 10.5	0.3533	-112.545	107.973	65.1041	-19.63 , 235.58	0.09722	43.4091
cg13222915	1	C1orf21	N	-64.9766	11.5659	-87.65 , -42.31	1.93e-08	0.35451	19.6397	-38.14 , 38.85	0.9856	-100.546	-0.02497	7.95582	-15.62 , 15.57	0.9975	-99.9616	15.1667	39.3796	-62.02 , 92.35	0.7001	-123.342
cg07814318	15	KLF13	N	53.6952	9.55817	34.96 , 72.43	1.94e-08	-9.06559	16.8283	-42.05 , 23.92	0.5901	-116.883	2.1061	4.71755	-7.14 , 11.35	0.6553	-96.0777	12.3415	29.2651	-45.02 , 69.7	0.6732	-77.0156
cg01303055	11	GALNT18	N	-95.031	16.919	-128.19 , -61.87	1.95e-08	-20.6522	27.169	-73.9 , 32.6	0.4472	-78.2679	-1.70028	7.21328	-15.84 , 12.44	0.8137	-98.2108	-29.5768	42.9611	-113.78 , 54.63	0.4912	-68.8766
cg04522498	8	TRAPPC9	N	57.718	10.2789	37.57 , 77.86	1.96e-08	-6.53875	29.7341	-64.82 , 51.74	0.8259	-111.329	4.53377	8.77072	-12.66 , 21.72	0.6052	-92.145	48.813	95.6614	-138.68 , 236.31	0.6099	-15.4285
cg17828445	12	MARCH9	N	97.9873	17.4597	63.77 , 132.21	2e-08	88.9917	28.0344	34.04 , 143.94	0.001502	-9.18031	6.79385	6.53952	-6.02 , 19.61	0.2989	-93.0666	46.8911	40.2843	-32.07 , 125.85	0.2444	-52.1457
cg03144619	1	GALNT2	N	29.3189	5.224	19.08 , 39.56	2e-08	33.1805	11.8723	9.91 , 56.45	0.005193	13.1712	0.42822	2.58317	-4.63 , 5.49	0.8683	-98.5394	-38.8924	40.3454	-117.97 , 40.18	0.3351	-232.653
cg21369801	17	CSNK1D	N	52.9796	9.44012	34.48 , 71.48	2e-08	-19.1819	16.7308	-51.97 , 13.61	0.2516	-136.206	-0.85059	5.15144	-10.95 , 9.25	0.8689	-101.606	-50.8657	23.1358	-96.21 , -5.52	0.02791	-196.01
cg17725019	22	PIK3IP1	N	63.1106	11.2453	41.07 , 85.15	2e-08	-10.6598	20.8326	-51.49 , 30.17	0.6089	-116.891	1.86102	9.00637	-15.79 , 19.51	0.8363	-97.0512	12.1907	41.9269	-69.99 , 94.37	0.7712	-80.6836
cg08706907	11	ATG13	N	90.0581	16.0558	58.59 , 121.53	2.03e-08	-40.5138	27.4544	-94.32 , 13.3	0.14	-144.986	4.14609	11.2826	-17.97 , 26.26	0.7133	-95.3962	-121.249	53.8256	-226.75 , -15.75	0.02428	-234.634
cg22030032	19	RAB4B-EGLN2	N	86.1413	15.3563	56.04 , 116.24	2.03e-08	20.3165	17.1163	-13.23 , 53.86	0.2352	-76.4149	44.5584	37.9415	-29.81 , 118.92	0.2402	-48.2729	-13.625	41.5666	-95.1 , 67.85	0.7431	-115.817
cg21646032	3	RARB	N	-63.5236	11.3278	-85.73 , -41.32	2.05e-08	10.6112	19.9463	-28.48 , 49.71	0.5947	-116.704	-11.3041	21.7453	-53.92 , 31.32	0.6032	-82.2049	35.4996	27.1136	-17.64 , 88.64	0.1904	-155.884
cg17038235	5	ERGIC1	N	49.5618	8.84594	32.22 , 66.9	2.11e-08	9.46631	16.3498	-22.58 , 41.51	0.5626	-80.9	14.3999	17.1513	-19.22 , 48.02	0.4011	-70.9457	-81.5385	34.7495	-149.65 , -13.43	0.01895	-264.519
cg13638420	11	WT1	N	-48.1432	8.59449	-64.99 , -31.3	2.12e-08	-6.84466	17.6343	-41.41 , 27.72	0.6979	-85.7827	-2.41499	3.94877	-10.15 , 5.32	0.5408	-94.9837	-18.5159	25.7677	-69.02 , 31.99	0.4724	-61.54
cg10147974	12	WNT5B	N	-49.2555	8.7987	-66.5 , -32.01	2.17e-08	-23.1111	17.9995	-58.39 , 12.17	0.1991	-53.0791	-10.6381	4.49368	-19.45 , -1.83	0.01792	-78.4021	29.6855	29.975	-29.07 , 88.44	0.322	-160.268
cg01994290	14	PLEKHG3	N	-92.9404	16.6026	-125.48 , -60.4	2.17e-08	-37.5679	31.0393	-98.4 , 23.27	0.2262	-59.5784	-18.6265	11.8176	-41.79 , 4.54	0.115	-79.9587	-57.3075	45.4223	-146.34 , 31.72	0.2071	-38.3394
cg00886780	6	SCUBE3	N	-45.6429	8.15754	-61.63 , -29.65	2.2e-08	10.174	12.6284	-14.58 , 34.93	0.4205	-122.29	-12.8214	6.79051	-26.13 , 0.49	0.05901	-71.9094	-33.3961	41.279	-114.3 , 47.51	0.4185	-26.8319
cg23545458	12	POLE	N	55.3311	9.89287	35.94 , 74.72	2.23e-08	7.11908	20.1478	-32.37 , 46.61	0.7238	-87.1337	-0.66919	3.34233	-7.22 , 5.88	0.8413	-101.209	-7.98511	37.6865	-81.85 , 65.88	0.8322	-114.432
cg06001419	7	FOXK1	N	-56.4519	10.094	-76.24 , -36.67	2.24e-08	-5.05112	16.083	-36.57 , 26.47	0.7535	-91.0524	-3.46663	5.17337	-13.61 , 6.67	0.5028	-93.8591	-15.6359	36.2825	-86.75 , 55.48	0.6665	-72.3023
cg23059461	10	PRF1	N	-89.711	16.0481	-121.17 , -58.26	2.27e-08	52.0325	29.7613	-6.3 , 110.36	0.08041	-158	-1.07258	8.98436	-18.68 , 16.54	0.905	-98.8044	33.2629	46.8104	-58.49 , 125.01	0.4773	-137.078
cg26230651	2	PAX8	N	70.0592	12.5339	45.49 , 94.63	2.28e-08	2.74507	20.5411	-37.52 , 43.01	0.8937	-96.0818	11.7473	10.3339	-8.51 , 32	0.2556	-83.2324	15.792	27.1341	-37.39 , 68.97	0.5606	-77.4591
cg20141108	1	UCK2	N	-55.7287	9.97199	-75.27 , -36.18	2.29e-08	-17.4358	15.6505	-48.11 , 13.24	0.2652	-68.7131	-10.0738	5.94816	-21.73 , 1.58	0.09034	-81.9235	-44.7801	33.4027	-110.25 , 20.69	0.18	-19.6462
cg12048965	10	KLF6	N	-39.0944	6.99573	-52.81 , -25.38	2.29e-08	-8.84231	13.1134	-34.54 , 16.86	0.5001	-77.3822	0.71328	5.1468	-9.37 , 10.8	0.8898	-101.825	2.25576	20.9739	-38.85 , 43.36	0.9144	-105.77
cg10615591	20	RTEL1-TNFRSF6B	N	82.1003	14.6909	53.31 , 110.89	2.29e-08	7.56408	17.2522	-26.25 , 41.38	0.6611	-90.7868	-12.469	5.28895	-22.84 , -2.1	0.0184	-115.187	-13.717	37.0362	-86.31 , 58.87	0.7111	-116.708
cg27108424	17	LOC100507351	N	67.372	12.0563	43.74 , 91	2.3e-08	6.91043	36.1567	-63.96 , 77.78	0.8484	-89.7429	-0.04478	10.2633	-20.16 , 20.07	0.9965	-100.066	127.072	78.2518	-26.3 , 280.44	0.1044	88.6118
cg06079495	10	RAB11FIP2	N	-69.0066	12.3581	-93.23 , -44.78	2.35e-08	-41.5831	21.4306	-83.59 , 0.42	0.05234	-39.7404	-10.0185	22.8662	-54.84 , 34.8	0.6613	-85.4819	-17.829	24.7162	-66.27 , 30.61	0.4707	-74.1633
cg09121543	17	LIMD2	N	60.1205	10.7683	39.01 , 81.23	2.36e-08	3.55736	22.891	-41.31 , 48.42	0.8765	-94.0829	17.8367	28.136	-37.31 , 72.98	0.5261	-70.3318	-22.1591	33.8621	-88.53 , 44.21	0.5129	-136.858
cg14875081	2	DUSP2	N	88.1448	15.7891	57.2 , 119.09	2.37e-08	-21.6195	35.2788	-90.77 , 47.53	0.54	-124.527	3.48387	7.62333	-11.46 , 18.43	0.6477	-96.0476	-42.791	43.2485	-127.56 , 41.98	0.3225	-148.546
cg18219522	11	MAML2	N	-56.2977	10.0876	-76.07 , -36.53	2.39e-08	-18.9231	13.4568	-45.3 , 7.45	0.1597	-66.3874	-1.38457	4.42675	-10.06 , 7.29	0.7545	-97.5406	5.44541	19.623	-33.02 , 43.91	0.7814	-109.673
cg07699546	1	NAV1	N	-61.7651	11.0667	-83.46 , -40.07	2.39e-08	4.6747	20.0589	-34.64 , 43.99	0.8157	-107.569	6.01591	4.61209	-3.02 , 15.06	0.1921	-109.74	-34.8088	37.4536	-108.22 , 38.6	0.3527	-43.6433
cg26604214	17	RAP1GAP2	N	-71.8176	12.8735	-97.05 , -46.59	2.42e-08	2.98687	24.554	-45.14 , 51.11	0.9032	-104.159	-0.66475	9.66655	-19.61 , 18.28	0.9452	-99.0744	39.1247	46.5386	-52.09 , 130.34	0.4005	-154.478
cg03467001	1	RGL1	N	-62.2277	11.1551	-84.09 , -40.36	2.43e-08	20.3074	20.8103	-20.48 , 61.1	0.3291	-132.634	-8.03616	23.0142	-53.14 , 37.07	0.727	-87.0859	-37.3927	25.4203	-87.22 , 12.43	0.1413	-39.91
cg09704401	2	SERTAD2	N	-52.3919	9.39459	-70.81 , -33.98	2.45e-08	-1.92353	16.2329	-33.74 , 29.89	0.9057	-96.3286	4.40559	7.30152	-9.91 , 18.72	0.5463	-108.409	-40.3823	43.2544	-125.16 , 44.4	0.3505	-22.9226
cg14387452	9	MLLT3	N	-64.5335	11.5742	-87.22 , -41.85	2.47e-08	11.5111	22.1658	-31.93 , 54.96	0.6035	-117.837	2.77359	7.46897	-11.87 , 17.41	0.7104	-104.298	22.6029	40.4712	-56.72 , 101.93	0.5765	-135.025
cg00075967	15	STRA6	N	51.1688	9.17926	33.18 , 69.16	2.48e-08	10.4419	18.4076	-25.64 , 46.52	0.5705	-79.5932	-0.90898	7.48184	-15.57 , 13.76	0.9033	-101.776	43.171	40.4866	-36.18 , 122.52	0.2863	-15.6303
cg15741354	8	SGK223	N	-36.3502	6.52285	-49.13 , -23.57	2.51e-08	8.52109	11.024	-13.09 , 30.13	0.4395	-123.442	-3.02889	3.67684	-10.24 , 4.18	0.4101	-91.6675	25.5519	22.1987	-17.96 , 69.06	0.2497	-170.294
cg14154456	6	IBTK	N	-36.3982	6.53256	-49.2 , -23.59	2.52e-08	21.0797	17.0244	-12.29 , 54.45	0.2156	-157.914	22.5919	25.8532	-28.08 , 73.26	0.3822	-162.069	20.6208	31.8994	-41.9 , 83.14	0.518	-156.654
cg03354508	6	STXBP5	N	-63.6409	11.4247	-86.03 , -41.25	2.54e-08	-46.3378	13.0858	-71.99 , -20.69	0.0003985	-27.1887	0.70376	3.11118	-5.39 , 6.8	0.821	-101.106	-53.1717	20.7168	-93.78 , -12.57	0.01027	-16.4505
cg16597079	6	TRERF1	N	-77.1861	13.8554	-104.34 , -50.03	2.54e-08	-51.0674	36.4279	-122.47 , 20.33	0.161	-33.8386	58.303	47.4225	-34.65 , 151.25	0.2189	-175.536	103.549	63.6503	-21.21 , 228.3	0.1038	-234.155
cg19851563	19	GNG7	N	30.2954	5.43847	19.64 , 40.95	2.54e-08	10.3069	8.56945	-6.49 , 27.1	0.2291	-65.9786	33.7063	8.80542	16.45 , 50.96	0.0001292	11.2589	9.7119	11.3059	-12.45 , 31.87	0.3903	-67.9426
cg13937905	12	RARG	N	77.1706	13.854	50.02 , 104.32	2.54e-08	7.96626	16.456	-24.29 , 40.22	0.6283	-89.6771	-5.97593	6.41377	-18.55 , 6.6	0.3515	-107.744	-51.2872	52.689	-154.56 , 51.98	0.3304	-166.46
cg22164298	4	ANK2	N	-66.489	11.9421	-89.9 , -43.08	2.58e-08	-69.9524	19.316	-107.81 , -32.09	0.0002929	5.20894	-6.69868	5.84586	-18.16 , 4.76	0.2518	-89.9251	-17.9774	32.1991	-81.09 , 45.13	0.5766	-72.9619
cg20386404	1	PTPN14	N	-57.3835	10.3064	-77.58 , -37.18	2.58e-08	41.5766	14.6786	12.81 , 70.35	0.004619	-172.454	8.25446	4.36463	-0.3 , 16.81	0.0586	-114.385	-23.4419	31.3878	-84.96 , 38.08	0.4552	-59.1488
cg06634552	6	RNF182	N	-75.3626	13.5383	-101.9 , -48.83	2.6e-08	-64.5524	23.6128	-110.83 , -18.27	0.006261	-14.3443	0.34497	6.99084	-13.36 , 14.05	0.9606	-100.458	-25.4728	44.7026	-113.09 , 62.14	0.5688	-66.1997
cg25144135	1	TNFRSF18	N	-66.4035	11.9286	-89.78 , -43.02	2.6e-08	-28.604	25.9683	-79.5 , 22.29	0.2707	-56.9239	4.57183	8.80705	-12.69 , 21.83	0.6037	-106.885	-19.6527	40.389	-98.82 , 59.51	0.6266	-70.4042
cg20370909	7	RADIL	N	50.3937	9.05427	32.65 , 68.14	2.61e-08	22.7425	10.2194	2.71 , 42.77	0.02605	-54.8703	6.89264	3.84412	-0.64 , 14.43	0.07297	-86.3224	65.1325	22.1438	21.73 , 108.53	0.003268	29.2474
cg11067407	11	ZW10	N	-56.1941	10.0981	-75.99 , -36.4	2.63e-08	7.77042	18.0454	-27.6 , 43.14	0.6668	-113.828	1.43836	8.10784	-14.45 , 17.33	0.8592	-102.56	-49.5068	40.4174	-128.72 , 29.71	0.2206	-11.9005
cg21520055	14	NDRG2	N	-60.1992	10.8209	-81.41 , -38.99	2.65e-08	5.9093	17.948	-29.27 , 41.09	0.742	-109.816	-2.8488	5.74703	-14.11 , 8.42	0.6201	-95.2677	-47.6698	27.0284	-100.65 , 5.31	0.07778	-20.8133
cg14071925	19	LILRA2	N	-71.4207	12.841	-96.59 , -46.25	2.67e-08	-41.6731	19.7149	-80.31 , -3.03	0.03453	-41.6512	-15.6462	8.1986	-31.72 , 0.42	0.05634	-78.0929	-13.2816	32.1617	-76.32 , 49.76	0.6796	-81.4037
cg11659663	11	MACROD1	N	-58.9314	10.5964	-79.7 , -38.16	2.68e-08	-55.0353	19.4002	-93.06 , -17.01	0.004556	-6.61126	1.50312	5.92722	-10.11 , 13.12	0.7998	-102.551	-10.1715	33.3997	-75.63 , 55.29	0.7607	-82.7402
cg05349624	21	COL18A1	N	43.6512	7.84935	28.27 , 59.04	2.68e-08	41.6784	14.9171	12.44 , 70.92	0.005206	-4.51951	3.89407	4.34543	-4.62 , 12.41	0.3702	-91.0791	33.3883	20.5109	-6.81 , 73.59	0.1036	-23.5111
cg26073542	11	OSBPL5	N	-84.7574	15.2499	-114.65 , -54.87	2.73e-08	-4.20455	21.4693	-46.28 , 37.88	0.8447	-95.0393	1.45752	8.04166	-14.3 , 17.22	0.8562	-101.72	-8.70375	38.3315	-83.83 , 66.43	0.8204	-89.731
cg10780778	6	BTN3A2	N	-54.6313	9.83238	-73.9 , -35.36	2.76e-08	-25.6457	16.2721	-57.54 , 6.25	0.115	-53.0567	-1.16696	3.88797	-8.79 , 6.45	0.7641	-97.8639	-27.779	27.1809	-81.05 , 25.5	0.3068	-49.1518
cg08380440	11	MIR4686	N	45.0773	8.1181	29.17 , 60.99	2.81e-08	7.3784	12.5594	-17.24 , 31.99	0.5569	-83.6317	-4.83465	15.8531	-35.91 , 26.24	0.7604	-110.725	-45.9158	33.2809	-111.15 , 19.31	0.1677	-201.86
cg24328944	13	DZIP1	N	-73.2474	13.1907	-99.1 , -47.39	2.81e-08	2.43399	22.4746	-41.62 , 46.48	0.9138	-103.323	5.38153	4.88962	-4.2 , 14.97	0.2711	-107.347	-0.65724	40.0514	-79.16 , 77.84	0.9869	-99.1027
cg00694258	10	ARHGAP12	N	-37.916	6.82896	-51.3 , -24.53	2.82e-08	-10.1038	9.41084	-28.55 , 8.34	0.283	-73.3521	16.4518	9.71698	-2.59 , 35.5	0.09044	-143.39	-0.25271	18.6806	-36.87 , 36.36	0.9892	-99.3335
cg21542842	4	SEPT11	N	-88.8736	16.0076	-120.25 , -57.5	2.83e-08	-27.1447	37.709	-101.05 , 46.76	0.4716	-69.457	4.42019	7.30262	-9.89 , 18.73	0.545	-104.974	67.403	54.3968	-39.21 , 174.02	0.2153	-175.841
cg27588384	3	LIMD1	N	-63.1587	11.3775	-85.46 , -40.86	2.84e-08	-24.6591	15.2702	-54.59 , 5.27	0.1063	-60.9569	-9.10501	6.39495	-21.64 , 3.43	0.1545	-85.5839	-20.0091	41.6305	-101.6 , 61.59	0.6308	-68.3193
cg04497992	16	PRR35	N	-73.3738	13.2221	-99.29 , -47.46	2.87e-08	16.9913	16.4098	-15.17 , 49.15	0.3005	-123.157	-5.92944	4.59133	-14.93 , 3.07	0.1966	-91.9189	-57.608	46.1776	-148.12 , 32.9	0.2122	-21.4869
cg00567703	12	HOXC4	Y	-35.9973	6.4891	-48.72 , -23.28	2.9e-08	-42.4827	15.8112	-73.47 , -11.49	0.007212	18.0166	-20.9947	4.94093	-30.68 , -11.31	2.146e-05	-41.677	-62.9134	24.7275	-111.38 , -14.45	0.01095	74.7728
cg05208178	2	INPP5D	N	92.137	16.6142	59.57 , 124.7	2.93e-08	56.1101	35.8029	-14.06 , 126.28	0.1171	-39.1014	-2.80356	9.595	-21.61 , 16	0.7701	-103.043	11.1724	47.3052	-81.55 , 103.89	0.8133	-87.8741
cg09990613	20	TCEA2	N	70.4216	12.7011	45.53 , 95.32	2.95e-08	42.6844	22.7696	-1.94 , 87.31	0.06084	-39.3873	-0.16446	6.49638	-12.9 , 12.57	0.9798	-100.234	43.4454	31.7439	-18.77 , 105.66	0.1711	-38.3067
cg26340740	11	MPEG1	N	-50.2499	9.06326	-68.01 , -32.49	2.95e-08	16.8183	15.33	-13.23 , 46.87	0.2726	-133.469	-2.14421	5.66307	-13.24 , 8.96	0.705	-95.7329	-24.2513	29.9857	-83.02 , 34.52	0.4187	-51.7386
cg13888509	15	STRA6	N	59.9165	10.8082	38.73 , 81.1	2.96e-08	26.7358	20.7856	-14 , 67.48	0.1984	-55.3782	2.55737	10.3149	-17.66 , 22.77	0.8042	-95.7318	59.2306	40.3153	-19.79 , 138.25	0.1418	-1.14483
cg26236972	2	COPS8	N	-41.9616	7.56944	-56.8 , -27.13	2.96e-08	-5.06156	14.7096	-33.89 , 23.77	0.7308	-87.9376	-4.68888	4.78166	-14.06 , 4.68	0.3268	-88.8258	-22.1698	25.5207	-72.19 , 27.85	0.385	-47.1664
cg27292710	11	KCNJ5	N	69.7488	12.5898	45.07 , 94.42	3.02e-08	-43.8821	29.6195	-101.94 , 14.17	0.1385	-162.914	-14.985	14.3744	-43.16 , 13.19	0.2972	-121.484	-11.8917	73.3817	-155.72 , 131.94	0.8713	-117.049
cg00222472	1	PBX1	N	36.4016	6.57194	23.52 , 49.28	3.04e-08	0.16887	7.16522	-13.87 , 14.21	0.9812	-99.5361	1.93275	7.20837	-12.2 , 16.06	0.7886	-94.6905	11.9049	37.3704	-61.34 , 85.15	0.7501	-67.2955
cg10423607	8	CPA6	N	-44.1431	7.9748	-59.77 , -28.51	3.11e-08	-7.13201	17.1309	-40.71 , 26.44	0.6772	-83.8434	-12.4531	23.9401	-59.38 , 34.47	0.6029	-71.7892	38.188	26.1453	-13.06 , 89.43	0.1441	-186.51
cg13430173	9	PALM2-AKAP2	N	-83.0119	15.0065	-112.42 , -53.6	3.17e-08	-20.2024	19.2575	-57.95 , 17.54	0.2941	-75.6632	-25.2991	22.8131	-70.01 , 19.41	0.2674	-69.5235	51.0448	43.3455	-33.91 , 136	0.2389	-161.491
cg23693749	18	SALL3	N	48.792	8.82158	31.5 , 66.08	3.18e-08	-9.1425	17.4789	-43.4 , 25.12	0.6009	-118.738	-6.92174	17.121	-40.48 , 26.64	0.686	-114.186	38.2161	34.2766	-28.97 , 105.4	0.2649	-21.6755
cg23513600	3	TNIK	N	59.2476	10.7157	38.24 , 80.25	3.22e-08	-29.8572	20.3527	-69.75 , 10.03	0.1424	-150.394	-23.6274	21.1582	-65.1 , 17.84	0.2641	-139.879	-23.3859	45.3615	-112.29 , 65.52	0.6062	-139.472
cg04221877	1	RUNX3	N	89.0661	16.1143	57.48 , 120.65	3.26e-08	-17.0448	26.3995	-68.79 , 34.7	0.5185	-119.137	12.2715	6.85348	-1.16 , 25.7	0.07337	-86.222	53.8683	52.0009	-48.05 , 155.79	0.3002	-39.5188
cg10430742	11	KCNJ1	N	-61.0853	11.0553	-82.75 , -39.42	3.29e-08	-16.1295	15.6647	-46.83 , 14.57	0.3032	-73.5951	-2.90511	6.93179	-16.49 , 10.68	0.6751	-95.2442	-74.062	33.9932	-140.69 , -7.44	0.02935	21.2437
cg21597811	8	ZHX2	N	-56.5031	10.2299	-76.55 , -36.45	3.33e-08	0.57091	17.8841	-34.48 , 35.62	0.9745	-101.01	-22.1535	17.8922	-57.22 , 12.92	0.2157	-60.7923	2.67194	34.2851	-64.53 , 69.87	0.9379	-104.729
cg05814312	10	PTCHD3P1	N	-45.1042	8.16826	-61.11 , -29.09	3.35e-08	2.93196	14.9409	-26.35 , 32.22	0.8444	-106.5	1.12479	4.45616	-7.61 , 9.86	0.8007	-102.494	-49.3076	28.2407	-104.66 , 6.04	0.08081	9.31923
cg26003140	17	CCDC42	N	-59.6243	10.8013	-80.79 , -38.45	3.39e-08	17.3535	25.4167	-32.46 , 67.17	0.4948	-129.105	-14.0148	9.60153	-32.83 , 4.8	0.1444	-76.4947	37.271	47.6768	-56.18 , 130.72	0.4344	-162.51
cg11417612	12	BTBD11	N	-71.2512	12.9207	-96.58 , -45.93	3.5e-08	15.0025	20.8681	-25.9 , 55.9	0.4722	-121.056	6.3586	10.2968	-13.82 , 26.54	0.5369	-108.924	-37.7502	36.8741	-110.02 , 34.52	0.3059	-47.0182
cg25371590	2	GLI2	N	-32.2228	5.84441	-43.68 , -20.77	3.52e-08	-38.9369	13.5219	-65.44 , -12.43	0.003983	20.8365	-23.6258	14.6349	-52.31 , 5.06	0.1065	-26.6799	-134.905	43.2692	-219.71 , -50.1	0.001822	318.662
cg01878708	2	MIR5702	N	-36.7905	6.67267	-49.87 , -23.71	3.52e-08	-5.72842	12.6974	-30.62 , 19.16	0.6519	-84.4296	-32.038	12.0701	-55.7 , -8.38	0.007947	-12.9178	-6.83481	20.2871	-46.6 , 32.93	0.7362	-81.4223
cg18857467	1	HDAC1	N	-50.9656	9.24642	-69.09 , -32.84	3.55e-08	31.1916	16.4895	-1.13 , 63.51	0.05854	-161.201	2.36298	4.51263	-6.48 , 11.21	0.6005	-104.636	-20.8044	22.6039	-65.11 , 23.5	0.3574	-59.1795
cg19323059	7	INHBA-AS1	N	-55.3994	10.0543	-75.11 , -35.69	3.59e-08	20.4852	18.031	-14.86 , 55.83	0.2559	-136.977	10.9808	4.76248	1.65 , 20.32	0.02113	-119.821	5.3044	27.5014	-48.6 , 59.21	0.8471	-109.575
cg00350296	11	CD248	N	81.6428	14.8189	52.6 , 110.69	3.6e-08	-10.5317	34.9199	-78.97 , 57.91	0.763	-112.9	-0.86649	8.02701	-16.6 , 14.87	0.914	-101.061	-2.89392	41.1954	-83.64 , 77.85	0.944	-103.545
cg20663495	17	B3GNTL1	N	72.4125	13.1454	46.65 , 98.18	3.62e-08	-32.8697	27.4786	-86.73 , 20.99	0.2316	-145.392	4.47087	9.67461	-14.49 , 23.43	0.644	-93.8258	-21.5111	42.7177	-105.24 , 62.22	0.6146	-129.706
cg19265972	17	ASGR1	N	93.4417	16.9728	60.17 , 126.71	3.68e-08	31.0736	26.1406	-20.16 , 82.31	0.2346	-66.7454	8.79573	5.48136	-1.95 , 19.54	0.1086	-90.5869	-15.1111	35.8332	-85.34 , 55.12	0.6732	-116.172
cg21141329	17	COL1A1	N	74.003	13.4413	47.66 , 100.35	3.68e-08	16.5983	27.0931	-36.5 , 69.7	0.5401	-77.5708	-12.1887	9.02121	-29.87 , 5.49	0.1767	-116.47	11.1286	31.7136	-51.03 , 73.29	0.7257	-84.9619
cg05504759	3	DUSP7	N	84.4599	15.3419	54.39 , 114.53	3.69e-08	8.06343	30.7318	-52.17 , 68.3	0.793	-90.4529	-3.75477	10.1013	-23.55 , 16.04	0.7101	-104.446	8.88624	51.7798	-92.6 , 110.37	0.8637	-89.4787
cg04523868	11	MAP4K2	N	85.312	15.5058	54.92 , 115.7	3.76e-08	-47.2506	21.8363	-90.05 , -4.45	0.03048	-155.386	-5.68692	7.25094	-19.9 , 8.52	0.4329	-106.666	9.94838	40.041	-68.53 , 88.43	0.8038	-88.3388
cg21785384	1	TMCC2	N	63.2272	11.4933	40.7 , 85.75	3.77e-08	10.3997	21.012	-30.78 , 51.58	0.6206	-83.5519	-3.12675	8.43572	-19.66 , 13.41	0.7109	-104.945	86.6251	33.5773	20.81 , 152.44	0.009884	37.0061
cg01911077	11	SF1	N	62.6059	11.3963	40.27 , 84.94	3.94e-08	10.3771	29.9585	-48.34 , 69.1	0.7291	-83.4247	-56.7628	36.0161	-127.35 , 13.83	0.115	-190.667	22.519	39.7667	-55.42 , 100.46	0.5712	-64.0306
cg01143068	15	STARD9	N	-54.518	9.92679	-73.97 , -35.06	3.97e-08	-38.3957	23.4356	-84.33 , 7.54	0.1013	-29.5724	10.4052	5.57635	-0.52 , 21.33	0.06205	-119.086	-55.5939	41.5357	-137 , 25.82	0.1807	1.97348
cg27477277	21	TRPM2	N	-58.4523	10.643	-79.31 , -37.59	3.97e-08	-18.7273	19.431	-56.81 , 19.36	0.3352	-67.9614	4.55798	5.79698	-6.8 , 15.92	0.4317	-107.798	4.44418	22.3633	-39.39 , 48.28	0.8425	-107.603
cg00605777	2	SEMA4C	N	76.9459	14.0113	49.48 , 104.41	3.98e-08	14.8673	29.3874	-42.73 , 72.47	0.6129	-80.6782	-7.86658	6.28815	-20.19 , 4.46	0.2109	-110.224	-26.1896	42.7872	-110.05 , 57.67	0.5405	-134.036
cg14704980	7	INHBA	N	-46.8963	8.54057	-63.64 , -30.16	4e-08	45.6287	20.8963	4.67 , 86.59	0.02899	-197.297	1.78339	5.23804	-8.48 , 12.05	0.7335	-103.803	10.501	36.7614	-61.55 , 82.55	0.7751	-122.392
cg24635112	13	RASA3	N	64.9434	11.8278	41.76 , 88.13	4e-08	42.8155	22.6734	-1.62 , 87.26	0.05898	-34.0726	-6.87606	6.19078	-19.01 , 5.26	0.2667	-110.588	20.962	54.5383	-85.93 , 127.86	0.7007	-67.7227
cg00591515	19	LENG8	N	88.942	16.1995	57.19 , 120.69	4.01e-08	-2.21629	14.0379	-29.73 , 25.3	0.8746	-102.492	1.09303	6.66395	-11.97 , 14.15	0.8697	-98.7711	-14.2446	33.4657	-79.84 , 51.35	0.6704	-116.016
cg03048432	14	NIN	N	-48.5686	8.84875	-65.91 , -31.23	4.05e-08	31.5858	17.6904	-3.09 , 66.26	0.07418	-165.033	2.45476	5.54257	-8.41 , 13.32	0.6578	-105.054	-31.1468	28.3254	-86.66 , 24.37	0.2715	-35.8705
cg25215890	1	CD48	N	51.6536	9.41196	33.21 , 70.1	4.06e-08	13.3109	13.9329	-14 , 40.62	0.3394	-74.2305	3.06592	5.21946	-7.16 , 13.3	0.5569	-94.0645	41.0162	27.6244	-13.13 , 95.16	0.1376	-20.5938
cg08755703	16	IRX3	N	-42.5901	7.76526	-57.81 , -27.37	4.14e-08	-28.0109	12.9549	-53.4 , -2.62	0.0306	-34.2313	-27.0081	15.2569	-56.91 , 2.9	0.07669	-36.5859	-34.1443	20.3715	-74.07 , 5.78	0.09372	-19.8305
cg08032483	16	CLCN7	N	48.3725	8.8227	31.08 , 65.66	4.19e-08	6.72154	11.5212	-15.86 , 29.3	0.5596	-86.1046	-3.49097	6.07128	-15.39 , 8.41	0.5653	-107.217	5.26593	45.9988	-84.89 , 95.42	0.9089	-89.1138
cg20357806	4	PPBP	N	-67.4899	12.315	-91.63 , -43.35	4.25e-08	-25.0791	16.5329	-57.48 , 7.33	0.1293	-62.8403	-4.60261	6.72782	-17.79 , 8.58	0.4939	-93.1803	-65.0473	34.7744	-133.21 , 3.11	0.06141	-3.61922
cg12434362	5	MIR583	N	-42.2896	7.71667	-57.41 , -27.16	4.25e-08	-8.60868	16.8752	-41.68 , 24.47	0.61	-79.6435	-5.06644	21.5309	-47.27 , 37.13	0.814	-88.0196	56.1884	24.6921	7.79 , 104.58	0.02287	-232.866
cg23983783	13	N4BP2L1	N	-65.5217	11.9579	-88.96 , -42.08	4.27e-08	34.2812	18.1634	-1.32 , 69.88	0.05911	-152.32	5.36762	6.72302	-7.81 , 18.54	0.4246	-108.192	10.9657	41.1097	-69.61 , 91.54	0.7897	-116.736
cg09255514	16	ABCC1	N	-42.7446	7.80218	-58.04 , -27.45	4.29e-08	-6.02934	15.4825	-36.38 , 24.32	0.697	-85.8945	6.22659	7.17436	-7.84 , 20.29	0.3855	-114.567	15.1851	20.2125	-24.43 , 54.8	0.4525	-135.525
cg16001165	4	JADE1	N	-57.9513	10.579	-78.69 , -37.22	4.3e-08	0.03596	22.1602	-43.4 , 43.47	0.9987	-100.062	-8.12659	9.20868	-26.18 , 9.92	0.3775	-85.9769	4.57686	35.8847	-65.76 , 74.91	0.8985	-107.898
cg02106534	16	CDIP1	N	111.266	20.3416	71.4 , 151.14	4.5e-08	58.5476	41.1812	-22.17 , 139.26	0.1551	-47.3807	-7.43092	10.589	-28.19 , 13.32	0.4828	-106.678	16.2539	62.5747	-106.39 , 138.9	0.7951	-85.3919
cg02232751	11	LDHA	N	83.2889	15.228	53.44 , 113.14	4.51e-08	74.2779	34.288	7.07 , 141.48	0.03029	-10.819	7.61881	8.55971	-9.16 , 24.4	0.3734	-90.8526	-63.2806	53.6223	-168.38 , 41.82	0.238	-175.977
cg14992524	8	SOX7	N	60.3955	11.0425	38.75 , 82.04	4.52e-08	7.25563	18.6359	-29.27 , 43.78	0.697	-87.9865	-4.6497	6.99672	-18.36 , 9.06	0.5063	-107.699	-16.9889	30.9828	-77.72 , 43.74	0.5835	-128.129
cg03726357	8	DUSP4	N	-60.3785	11.041	-82.02 , -38.74	4.54e-08	40.2567	18.3105	4.37 , 76.15	0.02791	-166.674	16.7987	6.67643	3.71 , 29.88	0.01187	-127.822	-14.3909	29.4638	-72.14 , 43.36	0.6252	-76.1655
cg22441770	1	CRTC2	N	57.3812	10.494	36.81 , 77.95	4.55e-08	29.3446	18.7833	-7.47 , 66.16	0.1182	-48.8602	2.87672	9.09807	-14.96 , 20.71	0.7519	-94.9867	-41.8627	36.8256	-114.04 , 30.32	0.2556	-172.955
cg02835421	1	IPO13	N	-89.6539	16.3977	-121.79 , -57.51	4.57e-08	3.30272	39.8747	-74.85 , 81.46	0.934	-103.684	2.94499	5.785	-8.39 , 14.28	0.6107	-103.285	28.3028	49.5819	-68.88 , 125.48	0.5681	-131.569
cg07815836	19	ZNF274	Y	-59.0348	10.7988	-80.2 , -37.87	4.58e-08	-52.799	17.1151	-86.34 , -19.25	0.002036	-10.563	-12.5811	6.01361	-24.37 , -0.79	0.03643	-78.6888	-48.3918	24.2674	-95.96 , -0.83	0.04614	-18.0284
cg12233463	15	TMC3	N	-39.7697	7.27836	-54.04 , -25.5	4.65e-08	16.1779	12.528	-8.38 , 40.73	0.1966	-140.679	-4.89974	14.3361	-33 , 23.2	0.7325	-87.6797	-33.0949	20.6688	-73.61 , 7.42	0.1093	-16.7836
cg10601624	12	PLEKHG6	N	-48.9467	8.95811	-66.5 , -31.39	4.66e-08	-21.8918	24.7972	-70.49 , 26.71	0.3773	-55.2742	-0.90671	13.0808	-26.55 , 24.73	0.9447	-98.1476	2.57864	50.4203	-96.25 , 101.4	0.9592	-105.268
cg25656283	10	ERCC6	N	-48.3851	8.85574	-65.74 , -31.03	4.66e-08	3.3185	15.2411	-26.55 , 33.19	0.8276	-106.859	-8.57353	5.94474	-20.23 , 3.08	0.1492	-82.2806	-13.4235	27.045	-66.43 , 39.58	0.6197	-72.2569
cg15226659	19	SEMA6B	N	-57.3489	10.4964	-77.92 , -36.78	4.67e-08	-0.07882	22.8486	-44.86 , 44.7	0.9972	-99.8626	-8.07745	5.75921	-19.37 , 3.21	0.1608	-85.9153	-33.6489	52.7602	-137.06 , 69.76	0.5236	-41.326
cg03327570	2	ZEB2-AS1	N	-82.5338	15.1081	-112.15 , -52.92	4.68e-08	-32.513	21.3556	-74.37 , 9.34	0.1279	-60.6064	3.52641	4.20846	-4.72 , 11.77	0.4021	-104.273	-16.3461	38.8162	-92.43 , 59.73	0.6737	-80.1946
cg22593432	13	FRY	N	-67.8144	12.4153	-92.15 , -43.48	4.7e-08	-7.8659	21.431	-49.87 , 34.14	0.7136	-88.4008	2.78946	9.1248	-15.1 , 20.67	0.7598	-104.113	3.40198	30.1473	-55.69 , 62.49	0.9102	-105.017
cg07696514	8	IKBKB	N	72.7349	13.3192	46.63 , 98.84	4.74e-08	14.3734	25.0988	-34.82 , 63.57	0.5669	-80.2386	5.07829	9.06007	-12.68 , 22.84	0.5751	-93.0181	-89.7576	55.8809	-199.28 , 19.77	0.1082	-223.404
cg23401251	2	IFT172	N	-62.3431	11.4214	-84.73 , -39.96	4.8e-08	-22.2239	15.235	-52.08 , 7.64	0.1446	-64.3523	-11.8944	5.17392	-22.04 , -1.75	0.02151	-80.9211	-1.53234	32.1365	-64.52 , 61.46	0.962	-97.5421
cg10814005	14	GPR68	N	86.513	15.8558	55.44 , 117.59	4.86e-08	-1.22878	29.7096	-59.46 , 57	0.967	-101.42	14.6897	7.32881	0.33 , 29.05	0.04503	-83.0202	-17.3786	43.8057	-103.24 , 68.48	0.6916	-120.088
cg09174162	7	MAD1L1	N	34.4437	6.3128	22.07 , 46.82	4.87e-08	-5.12771	14.3126	-33.18 , 22.93	0.7201	-114.887	-0.99118	3.80328	-8.45 , 6.46	0.7944	-102.878	31.4512	25.42	-18.37 , 81.27	0.216	-8.68812
cg14001239	10	PTCHD3P1	N	36.1799	6.63266	23.18 , 49.18	4.9e-08	29.528	9.25103	11.4 , 47.66	0.001414	-18.3857	4.81342	3.79873	-2.63 , 12.26	0.2051	-86.6959	-5.26018	17.4313	-39.43 , 28.91	0.7628	-114.539
cg18515868	4	MAEA	N	75.9142	13.9187	48.63 , 103.19	4.92e-08	-61.1627	20.1598	-100.68 , -21.65	0.002414	-180.568	-5.45072	9.16482	-23.41 , 12.51	0.552	-107.18	39.3417	49.3878	-57.46 , 136.14	0.4257	-48.1761
cg26881863	8	TRAPPC9	N	61.6524	11.3057	39.49 , 83.81	4.95e-08	6.52564	22.3363	-37.25 , 50.3	0.7702	-89.4154	-0.6637	25.7692	-51.17 , 49.84	0.9795	-101.077	-19.899	46.7841	-111.6 , 71.8	0.6706	-132.276
cg14550985	11	RIN1	N	71.891	13.1887	46.04 , 97.74	5.01e-08	28.9938	28.5974	-27.06 , 85.04	0.3106	-59.6698	-0.08371	7.3827	-14.55 , 14.39	0.991	-100.116	-21.9498	34.595	-89.76 , 45.86	0.5258	-130.532
cg14751481	12	FBRSL1	N	60.8955	11.1733	39 , 82.8	5.03e-08	-22.0976	26.5401	-74.12 , 29.92	0.4051	-136.288	4.80219	8.51652	-11.89 , 21.49	0.5728	-92.114	-41.6298	47.6293	-134.98 , 51.72	0.3821	-168.363
cg18402166	17	PLEKHM1P	N	67.0467	12.3035	42.93 , 91.16	5.05e-08	13.9802	18.5157	-22.31 , 50.27	0.4502	-79.1486	13.0198	8.09826	-2.85 , 28.89	0.1079	-80.581	-19.1941	46.2918	-109.93 , 71.54	0.6784	-128.628
cg20014974	1	SLC45A1	N	75.4701	13.8534	48.32 , 102.62	5.1e-08	91.4926	26.725	39.11 , 143.87	0.0006182	21.2303	7.29519	6.96472	-6.36 , 20.95	0.2949	-90.3337	118.557	43.8389	32.63 , 204.48	0.006843	57.0919
cg03930153	3	TBL1XR1	N	-33.4647	6.14276	-45.5 , -21.42	5.1e-08	-33.9998	25.5425	-84.06 , 16.06	0.1832	1.599	29.9371	34.5673	-37.81 , 97.69	0.3865	-189.459	-33.078	41.6653	-114.74 , 48.59	0.4273	-1.15569
cg10928544	14	CCDC88C	N	40.7658	7.48719	26.09 , 55.44	5.19e-08	-40.5969	11.7398	-63.61 , -17.59	0.0005441	-199.586	-10.1165	13.4698	-36.52 , 16.28	0.4526	-124.816	-5.85838	19.7736	-44.61 , 32.9	0.767	-114.371
cg00431549	12	MGP	N	-46.9221	8.61918	-63.82 , -30.03	5.21e-08	7.7812	20.5087	-32.42 , 47.98	0.7044	-116.583	-2.5837	4.6793	-11.76 , 6.59	0.5808	-94.4936	5.85964	33.3774	-59.56 , 71.28	0.8606	-112.488
cg04324917	16	KLHDC4	N	53.4725	9.82376	34.22 , 72.73	5.23e-08	9.34317	19.3985	-28.68 , 47.36	0.6301	-82.5271	7.72884	8.67637	-9.28 , 24.73	0.373	-85.5461	-0.96936	50.249	-99.46 , 97.52	0.9846	-101.813
cg04682802	20	BTBD3	N	-34.6284	6.36158	-47.1 , -22.16	5.23e-08	9.30749	20.969	-31.79 , 50.41	0.6571	-126.878	7.12544	7.07628	-6.74 , 20.99	0.314	-120.577	30.5257	30.8458	-29.93 , 90.98	0.3224	-188.152
cg08026735	2	VWA3B	N	-64.1461	11.7851	-87.24 , -41.05	5.24e-08	-44.7985	22.4327	-88.77 , -0.83	0.04582	-30.1618	3.74064	5.69769	-7.43 , 14.91	0.5115	-105.831	-44.3472	32.9487	-108.93 , 20.23	0.1783	-30.8654
cg24973755	4	MAEA	N	59.1941	10.8761	37.88 , 80.51	5.25e-08	-18.2499	18.6417	-54.79 , 18.29	0.3276	-130.831	3.98975	4.624	-5.07 , 13.05	0.3882	-93.2599	8.98523	32.578	-54.87 , 72.84	0.7827	-84.8207
cg26104196	1	IGSF9	N	-90.4396	16.617	-123.01 , -57.87	5.25e-08	21.9361	44.5388	-65.36 , 109.23	0.6224	-124.255	-13.0165	45.8529	-102.89 , 76.86	0.7765	-85.6075	46.8786	57.9688	-66.74 , 160.5	0.4187	-151.834
cg05942111	12	RASSF3	N	-70.2109	12.9053	-95.51 , -44.92	5.31e-08	-9.64091	17.2656	-43.48 , 24.2	0.5766	-86.2687	5.08223	5.73139	-6.15 , 16.32	0.3752	-107.239	38.1355	42.6963	-45.55 , 121.82	0.3718	-154.316
cg01110839	11	SLC39A13	N	63.7274	11.7155	40.76 , 86.69	5.34e-08	-22.8231	18.3865	-58.86 , 13.21	0.2145	-135.814	-2.8604	7.10736	-16.79 , 11.07	0.6873	-104.488	16.5979	33.8708	-49.79 , 82.98	0.6241	-73.9549
cg03059073	7	LINC00996	N	-49.0427	9.01627	-66.71 , -31.37	5.35e-08	-21.6621	22.355	-65.48 , 22.15	0.3325	-55.8302	-4.64114	5.79155	-15.99 , 6.71	0.4229	-90.5365	14.4302	29.7469	-43.87 , 72.73	0.6276	-129.424
cg03471593	16	LPCAT2	N	-44.3764	8.1606	-60.37 , -28.38	5.39e-08	16.6879	13.146	-9.08 , 42.45	0.2043	-137.605	0.50714	4.50748	-8.33 , 9.34	0.9104	-101.143	-14.8894	24.3456	-62.61 , 32.83	0.5408	-66.4474
cg17901584	1	DHCR24	N	-46.5953	8.56861	-63.39 , -29.8	5.39e-08	-16.3832	16.2738	-48.28 , 15.51	0.3141	-64.8395	-3.86303	4.5043	-12.69 , 4.97	0.3911	-91.7094	19.7175	23.8618	-27.05 , 66.49	0.4086	-142.316
cg13963033	5	MARCH3	N	-50.2141	9.23498	-68.31 , -32.11	5.41e-08	25.4509	15.9372	-5.79 , 56.69	0.1103	-150.685	-7.86407	7.28906	-22.15 , 6.42	0.2806	-84.3389	-14.4125	34.6404	-82.31 , 53.48	0.6774	-71.298
cg03247245	12	GRIP1	N	-75.4762	13.8815	-102.68 , -48.27	5.41e-08	-13.346	22.8165	-58.07 , 31.37	0.5586	-82.3176	-0.21463	7.94614	-15.79 , 15.36	0.9785	-99.7156	-33.5916	40.7896	-113.54 , 46.36	0.4102	-55.4938
cg05012661	4	KIAA0232	N	-36.9466	6.79638	-50.27 , -23.63	5.44e-08	-13.8765	11.5759	-36.57 , 8.81	0.2306	-62.4417	-7.5371	5.20623	-17.74 , 2.67	0.1477	-79.6	-11.0456	21.5404	-53.26 , 31.17	0.6081	-70.1038
cg03047995	14	FITM1	N	-56.2708	10.3536	-76.56 , -35.98	5.48e-08	-3.67292	34.3754	-71.05 , 63.7	0.9149	-93.4728	2.54605	6.80348	-10.79 , 15.88	0.7082	-104.525	15.0548	32.6536	-48.95 , 79.06	0.6448	-126.754
cg16520815	16	MGRN1	N	55.3556	10.188	35.39 , 75.32	5.53e-08	10.2633	17.5142	-24.06 , 44.59	0.5579	-81.4593	4.99365	4.92307	-4.66 , 14.64	0.3104	-90.979	20.2635	29.5928	-37.74 , 78.27	0.4935	-63.394
cg22540040	12	RAP1B	N	-47.92	8.82385	-65.21 , -30.63	5.61e-08	-6.18842	14.9433	-35.48 , 23.1	0.6788	-87.0859	-12.4382	5.84502	-23.89 , -0.98	0.03334	-74.0439	32.7007	46.158	-57.77 , 123.17	0.4787	-168.24
cg10420527	11	LRP5	N	75.8834	13.9746	48.49 , 103.27	5.63e-08	0.06764	21.4725	-42.02 , 42.15	0.9975	-99.9109	-14.2317	9.6171	-33.08 , 4.62	0.1389	-118.755	-62.5108	41.4908	-143.83 , 18.81	0.1319	-182.377
cg24527636	1	AHDC1	N	42.2238	7.77847	26.98 , 57.47	5.69e-08	8.29188	12.9869	-17.16 , 33.75	0.5232	-80.3621	-1.21975	3.9521	-8.97 , 6.53	0.7576	-102.889	10.9049	34.0562	-55.85 , 77.65	0.7488	-74.1737
cg24842859	1	RUNX3	N	81.4152	14.998	52.02 , 110.81	5.69e-08	-7.37055	30.035	-66.24 , 51.5	0.8061	-109.053	-0.02617	4.01324	-7.89 , 7.84	0.9948	-100.032	-113.89	50.4159	-212.71 , -15.08	0.02388	-239.888
cg24129589	5	NKD2	N	-115.585	21.3083	-157.35 , -73.82	5.82e-08	35.9761	38.9591	-40.38 , 112.34	0.3558	-131.125	13.3742	6.4892	0.66 , 26.09	0.0393	-111.571	33.5813	59.3232	-82.69 , 149.85	0.5713	-129.053
cg13594630	12	KIAA1551	N	-65.5439	12.0858	-89.23 , -41.86	5.85e-08	6.17123	13.0556	-19.42 , 31.76	0.6364	-109.415	15.313	5.09925	5.32 , 25.31	0.002673	-123.363	20.0956	23.6815	-26.32 , 66.51	0.3961	-130.66
cg04189326	14	CDC42BPB	N	-57.7299	10.646	-78.6 , -36.86	5.87e-08	27.7026	30.9766	-33.01 , 88.42	0.3712	-147.987	-4.85697	8.13959	-20.81 , 11.1	0.5507	-91.5867	5.30231	49.6973	-92.1 , 102.71	0.915	-109.185
cg23188579	4	SCOC	N	-67.5468	12.4594	-91.97 , -43.13	5.91e-08	15.0988	28.2627	-40.3 , 70.49	0.5932	-122.353	-9.76838	7.06132	-23.61 , 4.07	0.1666	-85.5383	76.8471	49.549	-20.27 , 173.96	0.1209	-213.769
cg07858848	2	HAAO	N	-45.4235	8.38112	-61.85 , -29	5.97e-08	9.01004	16.2765	-22.89 , 40.91	0.5799	-119.836	-17.0142	21.6946	-59.54 , 25.51	0.4329	-62.5432	47.7681	29.6126	-10.27 , 105.81	0.1067	-205.161
cg13827209	9	TGFBR1	N	93.441	17.2439	59.64 , 127.24	6e-08	-33.297	32.6434	-97.28 , 30.68	0.3077	-135.634	3.96333	10.5056	-16.63 , 24.55	0.706	-95.7585	-83.2852	42.647	-166.87 , 0.3	0.05083	-189.131
cg15908975	7	GRM8	N	-35.8485	6.61786	-48.82 , -22.88	6.06e-08	-8.16387	10.109	-27.98 , 11.65	0.4193	-77.2268	0.0829	3.15342	-6.1 , 6.26	0.979	-100.231	-13.0685	16.8593	-46.11 , 19.98	0.4383	-63.5453
cg08627825	22	LINC00229	N	68.9162	12.723	43.98 , 93.85	6.07e-08	-2.55548	13.2993	-28.62 , 23.51	0.8476	-103.708	55.6679	25.1436	6.39 , 104.95	0.02683	-19.2238	18.6976	32.9478	-45.88 , 83.28	0.5704	-72.869
cg17327171	2	RBMS1	N	-69.1615	12.7747	-94.2 , -44.12	6.17e-08	-10.6001	27.7276	-64.95 , 43.75	0.7022	-84.6735	13.394	7.91445	-2.12 , 28.91	0.09058	-119.366	-32.2027	43.6597	-117.78 , 53.37	0.4608	-53.4384
cg03850035	2	EPHA4	N	-58.6541	10.8381	-79.9 , -37.41	6.24e-08	5.49308	20.7901	-35.26 , 46.24	0.7916	-109.365	-12.0698	8.12072	-27.99 , 3.85	0.1372	-79.422	-36.6304	45.2913	-125.4 , 52.14	0.4186	-37.5485
cg21649604	22	RPL3	N	80.723	14.9174	51.48 , 109.96	6.26e-08	76.9364	33.6611	10.96 , 142.91	0.02228	-4.69087	8.54709	6.8358	-4.85 , 21.95	0.2112	-89.4118	11.5148	41.3392	-69.51 , 92.54	0.7806	-85.7354
cg23033749	7	ST7	N	-47.9841	8.86785	-65.37 , -30.6	6.27e-08	-9.76818	14.8015	-38.78 , 19.24	0.5093	-79.6429	-6.44857	6.36032	-18.91 , 6.02	0.3106	-86.561	-0.15557	29.5042	-57.98 , 57.67	0.9958	-99.6758
cg26686361	16	IRF8	N	-54.7334	10.1204	-74.57 , -34.9	6.36e-08	16.1077	17.4065	-18.01 , 50.22	0.3548	-129.429	-10.8177	18.4529	-46.99 , 25.35	0.5577	-80.2357	-27.8821	28.4072	-83.56 , 27.8	0.3263	-49.0584
cg06775523	1	MEGF6	N	39.5992	7.32167	25.25 , 53.95	6.36e-08	3.21059	12.4489	-21.19 , 27.61	0.7965	-91.8923	5.49328	4.63177	-3.58 , 14.57	0.2356	-86.1278	41.522	19.8622	2.59 , 80.45	0.03657	4.8556
cg20519581	20	LINC01270	N	-66.0382	12.2107	-89.97 , -42.11	6.37e-08	11.5167	20.3275	-28.33 , 51.36	0.571	-117.439	2.04317	6.31316	-10.33 , 14.42	0.7462	-103.094	-0.43763	26.7887	-52.94 , 52.07	0.987	-99.3373
cg21220721	1	ACOT7	N	-68.0216	12.5779	-92.67 , -43.37	6.37e-08	1.89507	9.22098	-16.18 , 19.97	0.8372	-102.786	0.68697	3.29125	-5.76 , 7.14	0.8347	-101.01	-9.91154	30.6063	-69.9 , 50.08	0.7461	-85.4288
cg13951007	1	LOC728989	N	-85.8053	15.8678	-116.91 , -54.7	6.39e-08	0.66151	22.3698	-43.18 , 44.51	0.9764	-100.771	-14.8716	8.07202	-30.69 , 0.95	0.06542	-82.6682	-59.5769	45.3935	-148.55 , 29.39	0.1894	-30.5673
cg00410926	9	FAM166B	N	-56.373	10.4262	-76.81 , -35.94	6.41e-08	-32.598	26.7232	-84.98 , 19.78	0.2225	-42.1744	4.39332	8.06955	-11.42 , 20.21	0.5861	-107.793	33.029	93.3819	-150 , 216.06	0.7236	-158.59
cg07850246	11	C11orf40	N	-47.5206	8.78915	-64.75 , -30.29	6.42e-08	-11.4414	15.4921	-41.81 , 18.92	0.4602	-75.9232	9.18879	5.15237	-0.91 , 19.29	0.07452	-119.336	-22.9017	26.0296	-73.92 , 28.12	0.379	-51.8068
cg13009654	5	EGR1	N	95.4705	17.6575	60.86 , 130.08	6.42e-08	10.9876	35.8071	-59.19 , 81.17	0.759	-88.4911	0.06227	9.18722	-17.94 , 18.07	0.9946	-99.9348	-8.94675	40.0603	-87.46 , 69.57	0.8233	-109.371
cg15206445	16	SPG7	N	66.338	12.2724	42.28 , 90.39	6.46e-08	-27.7301	20.7103	-68.32 , 12.86	0.1806	-141.801	10.4471	7.13969	-3.55 , 24.44	0.1434	-84.2517	-28.7405	35.3533	-98.03 , 40.55	0.4162	-143.324
cg03875678	14	GZMB	N	-58.6916	10.8624	-79.98 , -37.4	6.55e-08	34.4505	24.1747	-12.93 , 81.83	0.1541	-158.697	1.98349	5.97325	-9.72 , 13.69	0.7398	-103.38	-2.92217	35.0868	-71.69 , 65.85	0.9336	-95.0211
cg14209730	2	LGALSL	N	-80.1672	14.8405	-109.25 , -51.08	6.59e-08	-27.0368	16.0431	-58.48 , 4.41	0.09194	-66.2744	6.54609	5.56758	-4.37 , 17.46	0.2397	-108.166	-46.755	32.5056	-110.47 , 16.96	0.1503	-41.6781
cg23227726	11	CLPB	N	-88.2035	16.3288	-120.21 , -56.2	6.6e-08	85.4661	38.7267	9.56 , 161.37	0.02732	-196.896	1.84368	10.2967	-18.34 , 22.03	0.8579	-102.09	95.4185	53.5767	-9.59 , 200.43	0.07492	-208.18
cg26833120	1	COL16A1	N	-53.6277	9.93024	-73.09 , -34.16	6.65e-08	-12.4165	20.6414	-52.87 , 28.04	0.5475	-76.8468	-6.19785	21.5705	-48.48 , 36.08	0.7739	-88.4428	-41.5097	36.6938	-113.43 , 30.41	0.258	-22.5966
cg17276535	4	RGS12	N	43.2031	8.00064	27.52 , 58.88	6.67e-08	12.7738	15.5006	-17.61 , 43.16	0.4099	-70.4331	10.7485	6.35117	-1.7 , 23.2	0.09058	-75.1209	-2.89129	30.9094	-63.47 , 57.69	0.9255	-106.692
cg26118943	5	SNX18	N	71.2451	13.1969	45.38 , 97.11	6.72e-08	-42.5912	23.5599	-88.77 , 3.59	0.07064	-159.781	-0.44462	4.99681	-10.24 , 9.35	0.9291	-100.624	-14.8987	35.9133	-85.29 , 55.49	0.6782	-120.912
cg15406387	4	ENPEP	N	-54.139	10.0301	-73.8 , -34.48	6.75e-08	-32.853	17.8847	-67.91 , 2.2	0.06622	-39.3172	-7.36611	4.40549	-16 , 1.27	0.09452	-86.3941	-47.1683	27.1382	-100.36 , 6.02	0.0822	-12.8755
cg22635096	21	ADARB1	N	73.7235	13.6583	46.95 , 100.49	6.75e-08	24.6891	21.9975	-18.43 , 67.8	0.2617	-66.5113	-0.60976	7.92241	-16.14 , 14.92	0.9386	-100.827	-16.5623	35.2035	-85.56 , 52.44	0.638	-122.465
cg01294327	19	SPPL2B	N	51.5619	9.55394	32.84 , 70.29	6.78e-08	14.8742	13.8489	-12.27 , 42.02	0.2828	-71.1528	6.72547	4.42974	-1.96 , 15.41	0.1289	-86.9565	-11.3875	15.084	-40.95 , 18.18	0.4503	-122.085
cg21454485	1	CD84	N	-44.9745	8.33641	-61.31 , -28.64	6.85e-08	10.7448	17.1184	-22.81 , 44.3	0.5302	-123.891	7.13791	5.02361	-2.71 , 16.98	0.1554	-115.871	-16.0793	31.6453	-78.1 , 45.95	0.6114	-64.2479
cg23623251	6	BMP6	N	-61.2423	11.3558	-83.5 , -38.98	6.93e-08	-21.9514	19.6333	-60.43 , 16.53	0.2635	-64.1565	-10.3683	6.61775	-23.34 , 2.6	0.1172	-83.0701	33.2938	32.8275	-31.05 , 97.64	0.3105	-154.364
cg05799596	13	RASA3	N	62.7246	11.6405	39.91 , 85.54	7.11e-08	15.5138	19.6619	-23.02 , 54.05	0.4301	-75.2668	7.77747	7.18725	-6.31 , 21.86	0.2792	-87.6006	-3.17822	44.3693	-90.14 , 83.79	0.9429	-105.067
cg19459094	5	GRK6	N	71.8804	13.3414	45.73 , 98.03	7.13e-08	109.882	41.3178	28.9 , 190.86	0.007827	52.8679	-3.15434	7.13204	-17.13 , 10.82	0.6583	-104.388	125.883	62.989	2.42 , 249.34	0.04566	75.1288
cg21193744	8	MCPH1	N	-114.265	21.2111	-155.84 , -72.69	7.16e-08	14.1277	19.0839	-23.28 , 51.53	0.4591	-112.364	-4.74633	7.18888	-18.84 , 9.34	0.5091	-95.8462	13.5788	51.2921	-86.95 , 114.11	0.7912	-111.884
cg17163527	1	MEGF6	N	-48.7811	9.05643	-66.53 , -31.03	7.19e-08	-19.2256	19.3178	-57.09 , 18.64	0.3196	-60.5881	3.96037	6.32053	-8.43 , 16.35	0.5309	-108.119	-12.8256	35.9793	-83.35 , 57.69	0.7215	-73.7079
cg08787968	11	WT1	N	-32.2683	5.99252	-44.01 , -20.52	7.25e-08	-17.4339	12.0328	-41.02 , 6.15	0.1474	-45.9719	-3.46384	4.46474	-12.21 , 5.29	0.4379	-89.2655	-17.4952	20.3413	-57.36 , 22.37	0.3897	-45.7819
cg09220326	3	CDCP1	N	-51.6355	9.59008	-70.43 , -32.84	7.27e-08	8.47741	14.6475	-20.23 , 37.19	0.5628	-116.418	-6.24239	5.31562	-16.66 , 4.18	0.2403	-87.9107	-32.5446	25.1424	-81.82 , 16.73	0.1955	-36.9723
cg26677394	6	RCAN2	N	-56.1772	10.4342	-76.63 , -35.73	7.29e-08	7.97096	14.997	-21.42 , 37.37	0.5951	-114.189	-4.06968	5.17317	-14.21 , 6.07	0.4315	-92.7556	64.0888	30.5421	4.23 , 123.95	0.03587	-214.083
cg10090414	8	LINC01300	N	31.7526	5.89874	20.19 , 43.31	7.33e-08	22.6566	21.4829	-19.45 , 64.76	0.2916	-28.6465	-6.59779	9.42457	-25.07 , 11.87	0.4839	-120.779	-4.88644	47.3681	-97.73 , 87.96	0.9178	-115.389
cg14527110	5	P4HA2	N	-77.4557	14.39	-105.66 , -49.25	7.34e-08	2.59553	35.3267	-66.64 , 71.84	0.9414	-103.351	-4.79994	7.63696	-19.77 , 10.17	0.5297	-93.803	30.4362	46.4596	-60.62 , 121.5	0.5124	-139.295
cg01066046	21	SCAF4	N	98.9131	18.3876	62.87 , 134.95	7.48e-08	11.5251	40.4479	-67.75 , 90.8	0.7757	-88.3483	36.8766	37.3054	-36.24 , 110	0.3229	-62.7182	40.8982	53.8534	-64.65 , 146.45	0.4476	-58.6524
cg05573767	6	RPS6KA2	N	29.0511	5.40188	18.46 , 39.64	7.53e-08	12.2704	7.97957	-3.37 , 27.91	0.1241	-57.7628	2.38966	2.63094	-2.77 , 7.55	0.3637	-91.7743	-1.94829	11.8191	-25.11 , 21.22	0.8691	-106.706
cg02589672	22	TEF	N	-117.017	21.7661	-159.68 , -74.36	7.61e-08	53.5287	50.1402	-44.75 , 151.8	0.2857	-145.744	4.56862	69.5524	-131.75 , 140.89	0.9476	-103.904	18.0637	70.4999	-120.12 , 156.24	0.7978	-115.437
cg25138553	1	HSPG2	N	-57.2262	10.6455	-78.09 , -36.36	7.63e-08	8.4862	14.0114	-18.98 , 35.95	0.5447	-114.829	0.80164	6.39801	-11.74 , 13.34	0.9003	-101.401	-32.5239	26.9309	-85.31 , 20.26	0.2272	-43.1661
cg27208052	16	MMP15	N	-63.7887	11.8672	-87.05 , -40.53	7.65e-08	-39.2666	20.4311	-79.31 , 0.78	0.05462	-38.4427	1.71608	7.18526	-12.37 , 15.8	0.8112	-102.69	-59.5845	43.4642	-144.77 , 25.61	0.1704	-6.59085
cg19370689	7	FBXL13	N	-68.4259	12.73	-93.38 , -43.48	7.65e-08	-21.0129	19.4973	-59.23 , 17.2	0.2812	-69.291	4.66443	7.13685	-9.32 , 18.65	0.5134	-106.817	-4.04413	39.3793	-81.23 , 73.14	0.9182	-94.0898
cg07313835	1	POU2F1	N	-87.306	16.2436	-119.14 , -55.47	7.67e-08	9.2926	36.2698	-61.8 , 80.38	0.7978	-110.644	25.0596	13.4041	-1.21 , 51.33	0.06155	-128.703	-16.8619	61.1485	-136.71 , 102.99	0.7827	-80.6864
cg05922714	16	N4BP1	N	-47.0521	8.75493	-64.21 , -29.89	7.69e-08	-8.14117	30.4243	-67.77 , 51.49	0.789	-82.6975	13.4396	47.4982	-79.66 , 106.54	0.7772	-128.563	-8.01354	47.4595	-101.03 , 85.01	0.8659	-82.9688
cg23473081	12	EMP1	N	-111.198	20.6936	-151.76 , -70.64	7.72e-08	-4.74155	53.4622	-109.53 , 100.04	0.9293	-95.7359	-68.3511	110.519	-284.97 , 148.27	0.5363	-38.5322	88.9319	92.0329	-91.45 , 269.32	0.3339	-179.976
cg27563968	12	GPRC5A	N	69.6269	12.9613	44.22 , 95.03	7.79e-08	-2.33736	25.5258	-52.37 , 47.69	0.927	-103.357	-5.95545	10.089	-25.73 , 13.82	0.555	-108.553	-11.1535	49.7551	-108.67 , 86.37	0.8226	-116.019
cg23606023	16	CBFA2T3	N	-94.3154	17.5579	-128.73 , -59.9	7.8e-08	11.2308	34.7033	-56.79 , 79.25	0.7462	-111.908	-6.18648	9.92107	-25.63 , 13.26	0.5329	-93.4406	-68.7913	50.7688	-168.3 , 30.72	0.1754	-27.0625
cg11935041	5	FAT2	N	-65.5378	12.2051	-89.46 , -41.62	7.89e-08	25.1519	22.3947	-18.74 , 69.05	0.2614	-138.378	-3.73446	8.3186	-20.04 , 12.57	0.6535	-94.3018	-9.37314	39.3497	-86.5 , 67.75	0.8117	-85.6981
cg22626522	22	TEF	N	-80.4306	14.9808	-109.79 , -51.07	7.92e-08	-41.0628	31.2708	-102.35 , 20.23	0.1891	-48.9463	46.1081	34.0209	-20.57 , 112.79	0.1753	-157.326	-1.99385	50.1753	-100.34 , 96.35	0.9683	-97.521
cg03764274	17	OXLD1	N	79.1249	14.74	50.23 , 108.02	7.96e-08	35.1451	28.8553	-21.41 , 91.7	0.2232	-55.5828	-12.9282	7.18502	-27.01 , 1.15	0.07197	-116.339	-10.0494	42.6439	-93.63 , 73.53	0.8137	-112.701
cg07624815	3	FGD5	N	119.772	22.3292	76.01 , 163.54	8.14e-08	-60.2059	56.7119	-171.36 , 50.95	0.2884	-150.267	-4.20979	11.1707	-26.1 , 17.68	0.7063	-103.515	84.7965	66.3332	-45.22 , 214.81	0.2011	-29.2017
cg08351131	17	HEXIM2	N	-60.6075	11.2993	-82.75 , -38.46	8.15e-08	6.65823	25.3124	-42.95 , 56.27	0.7925	-110.986	-3.676	9.40892	-22.12 , 14.77	0.696	-93.9347	10.5692	46.187	-79.96 , 101.1	0.819	-117.439
cg14105680	2	IL37	N	-48.4453	9.03262	-66.15 , -30.74	8.17e-08	-11.2823	16.2825	-43.2 , 20.63	0.4884	-76.7112	5.27276	6.44184	-7.35 , 17.9	0.4131	-110.884	9.25331	30.1292	-49.8 , 68.31	0.7588	-119.101
cg17036469	1	AMPD2	N	47.566	8.86914	30.18 , 64.95	8.18e-08	0.11047	14.0479	-27.42 , 27.64	0.9937	-99.7678	-1.48419	4.64133	-10.58 , 7.61	0.7491	-103.12	-14.247	20.0159	-53.48 , 24.98	0.4766	-129.952
cg01982597	10	ERCC6	N	-104.527	19.4934	-142.73 , -66.32	8.22e-08	-22.6804	28.7065	-78.94 , 33.58	0.4295	-78.3019	2.78321	15.0468	-26.71 , 32.27	0.8533	-102.663	-19.1004	60.5411	-137.76 , 99.56	0.7524	-81.7268
cg03677056	17	SLFN12L	N	-59.4004	11.0773	-81.11 , -37.69	8.22e-08	-5.99829	21.6671	-48.47 , 36.47	0.7819	-89.9019	14.5044	5.61813	3.49 , 25.52	0.009831	-124.418	28.8533	41.7192	-52.92 , 110.62	0.4892	-148.574
cg15446391	11	WT1	N	-51.1658	9.54218	-69.87 , -32.46	8.23e-08	-3.42851	21.2853	-45.15 , 38.29	0.872	-93.2992	-1.67296	8.23151	-17.81 , 14.46	0.8389	-96.7303	-71.5178	31.3598	-132.98 , -10.05	0.02257	39.7765
cg26280998	6	KLHL31	N	-65.0355	12.1311	-88.81 , -41.26	8.27e-08	37.7005	19.7335	-0.98 , 76.38	0.05607	-157.969	8.01657	6.70714	-5.13 , 21.16	0.232	-112.326	22.0064	36.5882	-49.71 , 93.72	0.5475	-133.837
cg20176142	8	ZBTB10	N	-47.3908	8.8405	-64.72 , -30.06	8.29e-08	7.64098	16.4316	-24.57 , 39.85	0.6419	-116.123	4.98412	5.87288	-6.53 , 16.49	0.3961	-110.517	20.1106	32.674	-43.93 , 84.15	0.5382	-142.436
cg00780426	6	HIST1H3I	N	-53.1034	9.90902	-72.53 , -33.68	8.36e-08	51.5196	19.3103	13.67 , 89.37	0.007631	-197.018	3.63956	4.96208	-6.09 , 13.37	0.4633	-106.854	26.3496	28.4619	-29.44 , 82.14	0.3546	-149.62
cg10084993	16	SLC9A3R2	N	52.381	9.77498	33.22 , 71.54	8.38e-08	5.12176	13.8501	-22.02 , 32.27	0.7115	-90.2221	2.89053	5.00038	-6.91 , 12.69	0.5632	-94.4817	-29.3342	30.5712	-89.25 , 30.59	0.3373	-156.002
cg11539055	4	ANTXR2	N	58.9221	10.9976	37.37 , 80.48	8.43e-08	-152.455	42.6002	-235.95 , -68.96	0.0003453	-358.739	-10.1343	44.1425	-96.65 , 76.39	0.8184	-117.199	1.03116	104.58	-203.95 , 206.01	0.9921	-98.25
cg01858866	1	PABPC4	N	67.4475	12.5919	42.77 , 92.13	8.49e-08	86.3003	26.6781	34.01 , 138.59	0.001217	27.9517	8.49042	5.90588	-3.09 , 20.07	0.1505	-87.4118	-53.1417	40.0852	-131.71 , 25.43	0.1849	-178.79
cg22123711	1	TNFRSF8	N	-49.8695	9.31067	-68.12 , -31.62	8.5e-08	17.6698	18.8458	-19.27 , 54.61	0.3485	-135.432	1.64191	7.49097	-13.04 , 16.32	0.8265	-103.292	58.4799	42.7196	-25.25 , 142.21	0.171	-217.266
cg20494635	11	MRPL23-AS1	N	68.9876	12.8816	43.74 , 94.24	8.53e-08	44.9867	23.4275	-0.93 , 90.9	0.05483	-34.7902	2.23813	5.33086	-8.21 , 12.69	0.6746	-96.7558	-19.2428	38.3808	-94.47 , 55.98	0.6161	-127.893
cg21554670	17	GAS7	N	-51.3969	9.59709	-70.21 , -32.59	8.53e-08	-8.34827	15.5347	-38.8 , 22.1	0.591	-83.7572	4.47848	6.63971	-8.54 , 17.49	0.5	-108.714	-30.8715	30.9493	-91.53 , 29.79	0.3185	-39.9351
cg01099825	9	NELFB	N	49.3207	9.21133	31.27 , 67.37	8.59e-08	-8.48935	19.059	-45.85 , 28.87	0.656	-117.213	-65.9437	30.0372	-124.82 , -7.07	0.02813	-233.704	-16.5092	31.1475	-77.56 , 44.54	0.5961	-133.473
cg16101213	7	MIR129-1	N	-70.8167	13.2273	-96.74 , -44.89	8.61e-08	13.2364	17.6779	-21.41 , 47.89	0.454	-118.691	11.3888	20.0437	-27.9 , 50.67	0.5699	-116.082	5.49124	30.0855	-53.48 , 64.46	0.8552	-107.754
cg04821520	11	C11orf74	N	-44.368	8.28985	-60.62 , -28.12	8.69e-08	-27.9575	18.2315	-63.69 , 7.78	0.1252	-36.9872	-10.0552	5.44181	-20.72 , 0.61	0.06464	-77.3369	-8.06315	28.8005	-64.51 , 48.39	0.7795	-81.8267
cg04982834	1	EVI5	N	-52.2108	9.75792	-71.34 , -33.09	8.77e-08	0.19975	17.8935	-34.87 , 35.27	0.9911	-100.383	-2.27042	7.21383	-16.41 , 11.87	0.753	-95.6514	-57.5093	31.4628	-119.18 , 4.16	0.06757	10.1484
cg05099464	11	ARHGEF12	N	-51.2159	9.57359	-69.98 , -32.45	8.81e-08	40.098	22.5428	-4.09 , 84.28	0.07528	-178.292	5.19597	6.93302	-8.39 , 18.78	0.4536	-110.145	0.65269	45.3188	-88.17 , 89.48	0.9885	-101.274
cg00549798	22	MKL1	N	47.8372	8.94421	30.31 , 65.37	8.87e-08	9.26041	18.6968	-27.39 , 45.91	0.6204	-80.6418	-6.74218	8.54285	-23.49 , 10	0.43	-114.094	-38.6752	63.4018	-162.94 , 85.59	0.5419	-180.848
cg25521481	6	TTBK1	N	-55.0669	10.2964	-75.25 , -34.89	8.88e-08	-12.6137	19.2797	-50.4 , 25.17	0.513	-77.0939	1.25139	7.31313	-13.08 , 15.59	0.8641	-102.272	-9.3468	30.4895	-69.11 , 50.41	0.7592	-83.0265
cg07116631	16	TIGD7	N	-55.3728	10.3555	-75.67 , -35.08	8.93e-08	-60.3953	18.0508	-95.77 , -25.02	0.0008203	9.07034	-9.47429	6.43297	-22.08 , 3.13	0.1408	-82.89	-48.8944	24.1803	-96.29 , -1.5	0.04317	-11.6996
cg03687532	16	FTO	N	-44.7473	8.36882	-61.15 , -28.34	8.95e-08	-27.4464	10.7723	-48.56 , -6.33	0.01084	-38.6635	-2.48267	4.54859	-11.4 , 6.43	0.5852	-94.4518	-32.3997	20.5769	-72.73 , 7.93	0.1154	-27.5941
cg14987354	14	LINC00911	N	-84.2755	15.7652	-115.18 , -53.38	9.01e-08	-10.165	22.5804	-54.42 , 34.09	0.6526	-87.9384	6.92429	7.1654	-7.12 , 20.97	0.3339	-108.216	5.63803	38.1806	-69.2 , 80.47	0.8826	-106.69
cg13458609	9	ENG	N	-58.4678	10.9403	-79.91 , -37.02	9.08e-08	14.6407	14.6383	-14.05 , 43.33	0.3172	-125.041	2.80563	4.1162	-5.26 , 10.87	0.4955	-104.799	35.7585	43.7238	-49.94 , 121.46	0.4135	-161.159
cg02370100	21	ABCG1	N	87.246	16.33	55.24 , 119.25	9.16e-08	79.6641	33.2004	14.59 , 144.74	0.01642	-8.69028	1.51401	6.26726	-10.77 , 13.8	0.8091	-98.2647	-37.9414	49.0414	-134.06 , 58.18	0.4391	-143.488
cg05343289	1	SELP	N	-67.9365	12.7189	-92.87 , -43.01	9.22e-08	-21.7465	20.5788	-62.08 , 18.59	0.2906	-67.99	-3.46683	8.23085	-19.6 , 12.67	0.6736	-94.897	-9.3361	40.3406	-88.4 , 69.73	0.817	-86.2576
cg06336535	19	FCHO1	N	63.9235	11.9724	40.46 , 87.39	9.33e-08	-19.2933	23.3365	-65.03 , 26.45	0.4084	-130.182	-4.54792	7.31034	-18.88 , 9.78	0.5339	-107.115	-25.8861	31.2042	-87.05 , 35.27	0.4068	-140.495
cg12127149	14	DYNC1H1	N	53.7085	10.0594	33.99 , 73.42	9.34e-08	-51.0137	29.2113	-108.27 , 6.24	0.08075	-194.983	0.04676	8.58261	-16.78 , 16.87	0.9957	-99.9129	-13.8551	40.4102	-93.06 , 65.35	0.7317	-125.797
cg13993914	9	NELFB	N	69.7427	13.0646	44.14 , 95.35	9.38e-08	44.5457	28.4661	-11.25 , 100.34	0.1176	-36.1285	-1.00041	5.51824	-11.82 , 9.82	0.8561	-101.434	-22.1888	40.5155	-101.6 , 57.22	0.5839	-131.815
cg16925459	7	HDAC9	N	-39.9091	7.47716	-54.56 , -25.25	9.43e-08	-8.76361	15.294	-38.74 , 21.21	0.5666	-78.0411	7.21059	3.84781	-0.33 , 14.75	0.06094	-118.068	5.57998	23.8171	-41.1 , 52.26	0.8148	-113.982
cg06898463	10	PBLD	N	-54.4276	10.1977	-74.42 , -34.44	9.44e-08	-1.29336	15.0965	-30.88 , 28.3	0.9317	-97.6237	0.83955	4.64276	-8.26 , 9.94	0.8565	-101.543	2.44308	35.5635	-67.26 , 72.15	0.9452	-104.489
cg04337944	22	FBLN1	N	67.8494	12.715	42.93 , 92.77	9.49e-08	-0.34725	30.1054	-59.35 , 58.66	0.9908	-100.512	1.73774	7.89158	-13.73 , 17.21	0.8257	-97.4388	-31.0001	42.5699	-114.44 , 52.44	0.4665	-145.69
cg20635389	2	CPO	N	74.1442	13.8975	46.91 , 101.38	9.55e-08	-1.76424	27.317	-55.31 , 51.78	0.9485	-102.379	6.74768	8.57032	-10.05 , 23.55	0.4311	-90.8992	-12.3143	33.2462	-77.48 , 52.85	0.7111	-116.609
cg18642369	13	DOCK9	N	-46.7458	8.76456	-63.92 , -29.57	9.63e-08	-1.11196	14.6951	-29.91 , 27.69	0.9397	-97.6213	-22.9777	21.5116	-65.14 , 19.19	0.2855	-50.8455	6.53233	22.7722	-38.1 , 51.17	0.7742	-113.974
cg08264519	14	BRF1	N	78.8775	14.7896	49.89 , 107.87	9.64e-08	29.9004	23.756	-16.66 , 76.46	0.2082	-62.0926	4.19472	8.4761	-12.42 , 20.81	0.6207	-94.682	17.5284	52.3437	-85.07 , 120.12	0.7377	-77.7777
cg14994947	1	SLC30A7	N	-58.7526	11.0164	-80.34 , -37.16	9.65e-08	28.2948	21.6332	-14.11 , 70.7	0.1909	-148.159	2.36677	8.06218	-13.44 , 18.17	0.7691	-104.028	-17.0467	38.2549	-92.03 , 57.93	0.6559	-70.9856
cg07830855	6	DST	N	-66.5604	12.4863	-91.03 , -42.09	9.79e-08	-3.12704	20.9573	-44.2 , 37.95	0.8814	-95.302	6.08102	7.59775	-8.81 , 20.97	0.4235	-109.136	-11.229	40.4234	-90.46 , 68	0.7812	-83.1297
cg07714085	2	PRKCE	N	-75.5686	14.1791	-103.36 , -47.78	9.84e-08	43.4083	22.3717	-0.44 , 87.26	0.05234	-157.442	-9.6463	10.7402	-30.7 , 11.4	0.3691	-87.235	-25.7101	56.5004	-136.45 , 85.03	0.6491	-65.9778
cg24024833	11	LSP1	N	74.7189	14.0239	47.23 , 102.21	9.93e-08	2.15563	27.3443	-51.44 , 55.75	0.9372	-97.115	-5.3302	8.89841	-22.77 , 12.11	0.5492	-107.134	16.3431	43.776	-69.46 , 102.14	0.7089	-78.1273
cg06462065	19	TMEM190	N	71.2467	13.374	45.03 , 97.46	9.97e-08	37.2994	20.2727	-2.44 , 77.03	0.06579	-47.6476	2.727	6.0318	-9.1 , 14.55	0.6512	-96.1725	-22.1842	42.8047	-106.08 , 61.71	0.6043	-131.137
cg21805788	1	FAM102B	N	-55.2097	10.3656	-75.53 , -34.89	1e-07	31.1107	17.0593	-2.33 , 64.55	0.0682	-156.35	3.23857	8.32588	-13.08 , 19.56	0.6973	-105.866	2.64972	41.898	-79.47 , 84.77	0.9496	-104.799
cg22202929	8	ZFPM2	N	-43.5662	8.17955	-59.6 , -27.53	1e-07	-0.06759	11.9428	-23.48 , 23.34	0.9955	-99.8449	-6.77475	4.52018	-15.63 , 2.08	0.1339	-84.4495	-13.6132	19.522	-51.88 , 24.65	0.4856	-68.7529
cg07579839	4	MFSD10	N	136.893	25.706	86.51 , 187.28	1.01e-07	31.9583	42.5937	-51.53 , 115.44	0.4531	-76.6546	87.5662	61.4233	-32.82 , 207.96	0.154	-36.0333	-44.188	58.122	-158.11 , 69.73	0.4471	-132.279
cg04884025	1	ZFYVE9	N	-68.5727	12.879	-93.82 , -43.33	1.01e-07	1.19927	21.5499	-41.04 , 43.44	0.9556	-101.749	-32.9966	24.1357	-80.3 , 14.31	0.1716	-51.8809	-136.159	47.2063	-228.68 , -43.63	0.003922	98.5618
cg18062064	20	TLDC2	N	-87.4341	16.4231	-119.62 , -55.24	1.02e-07	88.3356	27.3689	34.69 , 141.98	0.001248	-201.031	-13.4423	28.108	-68.53 , 41.65	0.6325	-84.6258	-27.5868	45.912	-117.57 , 62.4	0.5479	-68.4485
cg09273716	20	SOGA1	N	-53.2477	10.0059	-72.86 , -33.64	1.03e-07	0.87751	18.3876	-35.16 , 36.92	0.9619	-101.648	-8.45418	6.61913	-21.43 , 4.52	0.2015	-84.1229	-39.0936	38.9029	-115.34 , 37.16	0.3149	-26.5816
cg05061471	11	CALCA	N	70.9073	13.3279	44.78 , 97.03	1.04e-07	35.586	27.1903	-17.71 , 88.88	0.1906	-49.8134	-0.24412	6.12658	-12.25 , 11.76	0.9682	-100.344	-57.5186	32.7831	-121.77 , 6.74	0.07934	-181.118
