# Supplementary material for: Meta-analysis of epigenome-wide association studies in neonates reveals widespread differential DNA methylation associated with birthweight
Source: Nat Commun. 2019 Apr 23;10:1893. doi: 10.1038/s41467-019-09671-3 (PMC6478731; doi:10.1038/s41467-019-09671-3)
Supplement: Supplementary file 11 — Supplementary Data 8 [file 41467_2019_9671_MOESM11_ESM.xlsx]

## Sheet: SData8
Supplementary Data 8. Overlap of CpGs that are associated with birthweight as well as maternal smoking during pregnancy or maternal body mass index
	Associations with birthweight			Associations with maternal body mass index			Associations with maternal smoking during pregnancy
				Sharp et al. 2017			Joubert et al. 2016
				Penrichment = 1.28E-3			Penrichment = 6.12E-74
CpG	Coef	95% CI	P value	Coef	95% CI	P value	Coef	95% CI	P value
cg17782974	69.7212	53.6847 , 85.7577	1.58e-17	0.0008154	0.00057 , 0.00106	6.55e-11	-	-	-
cg09294084	61.6743	46.4167 , 76.9318	2.32e-15	0.000759107	0.0005 , 0.00102	1.52e-08	-	-	-
cg25521481	-55.0669	-75.2477 , -34.886	8.88e-08	-0.000534129	-0.00073 , -0.00034	9.78e-08	-	-	-
cg05575921	79.0348	57.462 , 100.6077	6.94e-13	-	-	-	-0.066	-0.0699 , -0.0621	1.35e-206
cg09935388	25.1416	17.031 , 33.2523	1.24e-09	-	-	-	-0.102	-0.1098 , -0.0942	2.29e-119
cg12876356	22.0782	15.0708 , 29.0857	6.6e-10	-	-	-	-0.096	-0.1038 , -0.0882	9.28e-108
cg26681628	-56.4827	-74.4997 , -38.4658	8.02e-10	-	-	-	0.02	0.0161 , 0.0239	1.55e-27
cg26889659	26.6671	18.8478 , 34.4865	2.32e-11	-	-	-	-0.043	-0.0508 , -0.0352	3.08e-26
cg00253658	-32.7123	-43.8347 , -21.5899	8.19e-09	-	-	-	0.039	0.0312 , 0.0468	4.42e-25
cg03144619	29.3189	34.477 , 71.4823	2e-08	-	-	-	-0.028	-0.0339 , -0.0221	7.52e-18
cg03687532	-44.7473	-61.1502 , -28.3444	8.95e-08	-	-	-	0.013	0.0091 , 0.0169	2.07e-14
cg02583484	75.362	51.3636 , 99.3605	7.51e-10	-	-	-	-0.006	-0.008 , -0.004	3.75e-14
cg14251267	37.6007	25.7983 , 49.4032	4.26e-10	-	-	-	-0.023	-0.0289 , -0.0171	4.23e-14
cg12160087	67.0641	44.0199 , 90.1083	1.17e-08	-	-	-	-0.009	-0.011 , -0.007	1.47e-12
cg03796381	-60.1728	-78.1866 , -42.159	5.87e-11	-	-	-	0.012	0.0081 , 0.0159	3.01e-12
cg07996594	66.08	44.1961 , 87.9639	3.25e-09	-	-	-	-0.007	-0.009 , -0.005	6.14e-12
cg12036877	67.6848	49.5443 , 85.8252	2.61e-13	-	-	-	-0.012	-0.0159 , -0.0081	3.09e-11
cg07565956	85.4477	57.6432 , 113.2523	1.71e-09	-	-	-	-0.006	-0.008 , -0.004	3.63e-11
cg24019564	76.8396	53.1947 , 100.4845	1.9e-10	-	-	-	-0.008	-0.01 , -0.006	3.91e-11
cg22057874	-61.9557	-79.5038 , -44.4077	4.52e-12	-	-	-	0.011	0.0071 , 0.0149	5.76e-11
cg25311470	72.9137	32.8289 , 64.0691	1.21e-09	-	-	-	-0.009	-0.011 , -0.007	6.29e-11
cg00930606	81.1827	54.329 , 108.0364	3.12e-09	-	-	-	-0.008	-0.01 , -0.006	6.42e-11
cg22441770	57.3812	36.813 , 77.9494	4.55e-08	-	-	-	-0.008	-0.01 , -0.006	6.78e-11
cg09726279	109.864	76.2655 , 143.462	1.46e-10	-	-	-	-0.006	-0.008 , -0.004	1.16e-10
cg07340025	-55.5131	-70.0708 , -40.9555	7.77e-14	-	-	-	0.015	0.0111 , 0.0189	1.2e-10
cg22877366	68.0042	52.2935 , 83.7149	2.18e-17	-	-	-	-0.014	-0.0179 , -0.0101	1.31e-10
cg15959363	-53.8772	-69.7839 , -37.9704	3.17e-11	-	-	-	0.012	0.0081 , 0.0159	2.03e-10
cg07638500	78.244	55.3939 , 101.0942	1.93e-11	-	-	-	-0.01	-0.0139 , -0.0061	4.23e-10
cg11138362	102.074	80.0731 , 124.0748	9.59e-20	-	-	-	-0.01	-0.0139 , -0.0061	6.7e-10
cg07313882	106.635	76.7683 , 136.502	2.6e-12	-	-	-	-0.007	-0.009 , -0.005	7.54e-10
cg01815912	90.1693	65.9357 , 114.403	3.04e-13	-	-	-	-0.006	-0.008 , -0.004	1.4e-09
cg02264407	60.5277	41.3072 , 79.7482	6.73e-10	-	-	-	-0.011	-0.0149 , -0.0071	1.41e-09
cg21649604	80.723	51.4849 , 109.9611	6.26e-08	-	-	-	-0.006	-0.008 , -0.004	1.65e-09
cg25122233	-45.3405	-59.5583 , -31.1227	4.09e-10	-	-	-	0.014	0.0101 , 0.0179	1.91e-09
cg02283735	-55.7028	-71.6445 , -39.7612	7.46e-12	-	-	-	0.013	0.0091 , 0.0169	6.21e-09
cg02892925	-40.7959	-53.7975 , -27.7943	7.75e-10	-	-	-	0.015	0.0091 , 0.0209	6.57e-09
cg07211044	-38.1791	-51.0377 , -25.3206	5.9e-09	-	-	-	0.017	0.0111 , 0.0229	7.62e-09
cg05779272	135.717	99.5333 , 171.9009	1.96e-13	-	-	-	-0.005	-0.007 , -0.003	7.71e-09
cg12374579	53.3703	35.6461 , 71.0945	3.59e-09	-	-	-	-0.008	-0.01 , -0.006	8.72e-09
cg03254465	53.7225	56.2521 , 100.3713	3.45e-12	-	-	-	-0.013	-0.0169 , -0.0091	9.5e-09
cg18299068	75.6072	52.786 , 98.4285	8.39e-11	-	-	-	-0.008	-0.01 , -0.006	1.69e-08
cg01741041	110.587	78.7472 , 142.4274	9.93e-12	-	-	-	-0.005	-0.007 , -0.003	1.97e-08
cg00508575	-64.9348	-126.7993 , -68.2465	6.62e-11	-	-	-	0.008	0.006 , 0.01	2.39e-08
cg01878708	-36.7905	-43.6778 , -20.7677	3.52e-08	-	-	-	0.014	0.0081 , 0.0199	3.75e-08
cg15014975	40.6606	28.1573 , 53.164	1.84e-10	-	-	-	-0.012	-0.0159 , -0.0081	4.24e-08
cg13594903	117.226	78.589 , 155.8635	2.74e-09	-	-	-	-0.004	-0.006 , -0.002	4.31e-08
cg08026735	-64.1461	-87.2449 , -41.0473	5.24e-08	-	-	-	0.008	0.006 , 0.01	4.32e-08
cg00496272	138.303	97.3937 , 179.2129	3.45e-11	-	-	-	-0.004	-0.006 , -0.002	9.52e-08
cg20494635	68.9876	43.7396 , 94.2356	8.53e-08	-	-	-	-0.007	-0.009 , -0.005	1.02e-07
cg06685437	64.2837	42.2119 , 86.3555	1.14e-08	-	-	-	-0.006	-0.008 , -0.004	2.6e-07
cg14001239	36.1799	23.1799 , 49.1799	4.9e-08	-	-	-	-0.012	-0.0159 , -0.0081	3.06e-07
cg16875057	-67.5687	-87.0388 , -48.0985	1.03e-11	-	-	-	0.007	0.005 , 0.009	4.53e-07
cg04872675	107.126	88.4932 , 125.759	1.87e-29	-	-	-	-0.009	-0.0129 , -0.0051	9.75e-07
cg10814005	86.513	55.4357 , 117.5904	4.86e-08	-	-	-	-0.004	-0.006 , -0.002	1.58e-06
cg13687834	-55.2256	-69.427 , -41.0242	2.5e-14	-	-	-	0.013	0.0071 , 0.0189	3.26e-06
cg20663495	72.4125	46.6474 , 98.1775	3.62e-08	-	-	-	-0.005	-0.007 , -0.003	9.33e-06
cg05208178	92.137	59.5731 , 124.7009	2.93e-08	-	-	-	-0.003	-0.005 , -0.001	2.48e-05
cg15233611	96.6555	74.0971 , 119.2138	4.54e-17	-	-	-	-0.005	-0.007 , -0.003	3.91e-05
