# Supplementary material for: Meta-analysis of epigenome-wide association studies in neonates reveals widespread differential DNA methylation associated with birthweight
Source: Nat Commun. 2019 Apr 23;10:1893. doi: 10.1038/s41467-019-09671-3 (PMC6478731; doi:10.1038/s41467-019-09671-3)
Supplement: Supplementary file 12 — Supplementary Data 9 [file 41467_2019_9671_MOESM12_ESM.xlsx]

## Sheet: SData9
Supplementary Data 9. Comparison of 914 birthweight-related CpG sites with metastable epialleles and CpGs associated with genomic imprinting
Gene set	N sites reported in previous studies	N sites overlapping with BW associated CpGs	CG IDs	Proximal genes	P enrichment
Metastable epiallele CpGs*	1936 CpGs	3	cg14161821,cg20364632,cg21646032	KDM4C,RARB	0.77
Imprinting control region CpGs**	741 CpGs	0	-	-	1
imprinted transcription start site CpGs***	1728 CpGs	5	cg04310331, cg07397493, cg18716210, cg20494635, cg20876852	MEST, H19****	0.28
* metastable epialleles identified in 450k screen
** CpGs falling within imprinting control regions
*** CpGs +/- 10kbp of imprinted gene transcription start site; imprinted genes from Monk et al. 2016
**** H19 is nearest imperinted gene within 10kbp; MRPL23-AS1 is closest gene
