# Supplementary material for: Meta-analysis of epigenome-wide association studies in neonates reveals widespread differential DNA methylation associated with birthweight
Source: Nat Commun. 2019 Apr 23;10:1893. doi: 10.1038/s41467-019-09671-3 (PMC6478731; doi:10.1038/s41467-019-09671-3)
Supplement: Supplementary file 13 — Supplementary Data 10 [file 41467_2019_9671_MOESM13_ESM.xlsx]

## Sheet: SData10
Supplementary Data 10. Birthweight-related CpGs sites that are located +/- 2Mb of birthweight-related SNPs from a recently published fetal GWAS meta-analysis (Horikoshi et al.) * CpG is located within 0.1 Mb of the SNP. Bold: SNP and CpG site located in the same gene.
EWAS hits (Küpers et al.)				GWAS hits (Horikoshi et al.)
CpG	Gene	Chr		Gene	Chr	SNP position	Index variant	SNP (Proxy)		Base pair difference	Flagged as polymorphic
cg25138553	HSPG2	1		WNT4-ZBTB40	1	22536643	rs2473248	rs2744726		-312802
cg16097041*	FLAD1	1		ZBTB7B	1	154986091	rs3753639	rs905938		-20547
cg25215890	CD48	1		FCGR2B	1	161644871	rs72480273	rs17413015		-993419
cg26906737	TMEM206	1		near DTL	1	212289976	rs61830764	NA		251575
cg13430552	DNMT3A	2		ATAD2B	2	23962647	rs7575873	rs718139		1465005
cg07714085*	PRKCE	2		EPAS1	2	46484205	rs1374204	rs1374204		-59353
cg26432350*	NBEAL2	3		PTH1R	3	46941116	rs2242116	rs2242116		99241
cg07638500	MYLK	3		ADCY5	3	123068744	rs11719201	rs7613951		302676
No CpG site within 2Mb				CPA3	3	148622968	rs10935733	rs12496367
cg19449917*	LINC00880	3		CCNL1-LEKR1	3	156795468	rs13322435	rs13322435		27888	Y
cg04460609	LDB2	4		LCORL	4	17919811	rs925098	rs925098		-1387003
No CpG site within 2Mb				HHIP	4	145601863	rs6537307	rs6537307
cg02402882	GPBP1	5		5q11.2	5	57091783	rs854037	rs854037		-471354
No CpG site within 2Mb				EBF1	5	157886953	rs7729301	rs2946164
No CpG site within 2Mb				CDKAL1	6	20675792	rs35261542	rs7756992
cg10780778	BTN3A2	6		HIST1H2BE	6	26186200	rs9379832	rs806794		165715
No CpG site within 2Mb				HMGA1	6	34165721	rs7742369	rs7742369
cg18334681	ENPP3	6		L3MBTL3	6	130345835	rs1415701	rs1415701		1720294
No CpG site within 2Mb				ESR1	6	152032917	rs1101081	rs851977
cg04396112	MAD1L1	7		GNA12	7	2801803	rs798489	rs798489		-650796
No CpG site within 2Mb				IGF2BP3	7	23479013	rs11765649	rs12540730
No CpG site within 2Mb				TBX20	7	35295365	rs6959887	rs6959887
cg19523667	ZMIZ2	7		YKT6-GCK	7	44246271	rs138715366	NA		549509
No CpG site within 2Mb				MLXIPL	7	73056805	rs62466330	rs17401675
cg22347642	GINS4	8		ANK1-NKX6-3	8	41533514	rs13266210	rs13266210		-150563
cg10173172	TMEM65	8		TRIB1	8	126508746	rs6989280	rs6989280		-1127934
cg10090414*	LINC01300	8		SLC45A4	8	142247979	rs12543725	rs12543725		61673
cg13740339	FBP1	9		PTCH1	9	98245026	rs28510415	rs3824488		-844269
cg13430173	PALM2-AKAP2	9		LPAR1	9	113945067	rs2150052	rs2150052		-1030918
No CpG site within 2Mb				STRBP	9	125824055	rs700059	rs700059
No CpG site within 2Mb				PHF19	9	123631225	rs7847628	rs1056567
No CpG site within 2Mb				HHEX-IDE	10	94468643	rs61862780	rs2497306
cg16396933*	NT5C2	10		NT5C2	10	104913940	rs74233809	rs11191582		40163
cg00831931	TCF7L2	10		ADRB1	10	115789375	rs7076938	rs7076938		-966281
No CpG site within 2Mb				PLEKHA1	10	124167512	rs2421016	rs2421016
cg02704502*	H19	11		INS-IGF2	11	2130620	rs72851023	NA		-94040
No CpG site within 2Mb				MTNR1B	11	92708710	rs10830963	rs10830963
cg27563968	GPRC5A	12		APOLD1	12	12890626	rs11055034	rs11055034		147185
No CpG site within 2Mb				ABCC9	12	22068161	rs139975827	rs4148656
cg26165146	ARNTL2	12		ITPR2	12	26872730	rs12823128	rs12823128		611926
No CpG site within 2Mb				HMGA2	12	66351826	rs1351394	rs1351394
No CpG site within 2Mb				IGF1	12	102994878	rs7964361	rs7964361
No CpG site within 2Mb				LINC00332	13	40662001	rs2324499	rs2324499
cg21586223	CYSLTR2	13		RB1	13	48882363	rs2854355	rs9568028		344758	Y
cg02397552	CLN5	13		RNF219-AS1	13	78580283	rs1819436	rs944379		-1004205
cg27132471	SLCO3A1	15		FES	15	91427612	rs12906125	rs6227		1185668
cg27139419*	IGF1R	15		IGF1R	15	99193269	rs7402982	NA		19135
cg06478823	ACSM3	16		GPR139	16	19992996	rs1011939	rs1858988		781877
cg20752878*	ASGR1	17		CLDN7	17	7171356	rs113086489	rs5417		-90818
No CpG site within 2Mb				SUZ12P1-CRLF3	17	29037339	rs144843919	NA
cg05294455	MYL4	17		SP6-SP2	17	45968294	rs12942207	rs11079800		-681685
No CpG site within 2Mb				ACTL9	19	8787750	rs61154119	rs2967684
No CpG site within 2Mb				PEPD	19	33926013	rs10402712	NA
cg04682802	BTBD3	20		JAG1	20	10658882	rs6040076	rs2206815		1239596
No CpG site within 2Mb				C20orf203	20	31275581	rs28530618	rs6057610
No CpG site within 2Mb				MAFB	20	39172728	rs6016377	rs6016377
No CpG site within 2Mb				NRIP1	21	16339172	rs2229742	rs2229742
No CpG site within 2Mb				KREMEN1	22	29468456	rs134594	rs134594
cg16000331*	SREBF2	22		SREBF2	22	42259524	rs62240962	rs10483213		-29386
No CpG site within 2Mb				PLAC1	X	22068161	rs11096402	rs11096402
