# Supplementary material for: Meta-analysis of epigenome-wide association studies in neonates reveals widespread differential DNA methylation associated with birthweight
Source: Nat Commun. 2019 Apr 23;10:1893. doi: 10.1038/s41467-019-09671-3 (PMC6478731; doi:10.1038/s41467-019-09671-3)
Supplement: Supplementary file 14 — Supplementary Data 11 [file 41467_2019_9671_MOESM14_ESM.xlsx]

## Sheet: SData11
Supplementary Data 11. Birthweight-related CpGs sites that are located +/- 2Mb of birthweight-related SNPs from a recently published maternal GWAS meta-analysis (Beaumont et al.) * CpG is located within 0.1 Mb of the SNP. Bold: SNP and CpG site located in the same gene.
EWAS hits Küpers et al.				GWAS hits Beaumont et al.
CpG	Gene	Chr		Gene	Chr	SNP position	SNP		Base pair difference	Flagged as polymorphic
cg00873678	CCDC88C	14		MTNR1B	11	92708710	rs10830963		-938658
cg04982834	EVI5	1		MTNR1B	11	92708710	rs10830963		549578
cg09935388	GFI1	1		MTNR1B	11	92708710	rs10830963		238878
cg10547908	FAM174B	15		MTNR1B	11	92708710	rs10830963		459358
cg10814005	GPR68	14		MTNR1B	11	92708710	rs10830963		-997669
cg10928544	CCDC88C	14		MTNR1B	11	92708710	rs10830963		-845846
cg12876356	GFI1	1		MTNR1B	11	92708710	rs10830963		238115
cg22925751	LOC643339	12		MTNR1B	11	92708710	rs10830963		800427
cg27132471*	SLCO3A1	15		MTNR1B	11	92708710	rs10830963		-95430
cg00153395	JAK1	1		HMGA2	12	66351826	rs1351394		-1024303
cg00350296	CD248	11		HMGA2	12	66351826	rs1351394		-266985
cg00496272	CENPT	16		HMGA2	12	66351826	rs1351394		1525406
cg00971695	PLEKHG3	14		HMGA2	12	66351826	rs1351394		-1182162
cg01911077	SF1	11		HMGA2	12	66351826	rs1351394		-1820083
cg01994290	PLEKHG3	14		HMGA2	12	66351826	rs1351394		-1181777
cg03247245	GRIP1	12		HMGA2	12	66351826	rs1351394		920748
cg04523868	MAP4K2	11		HMGA2	12	66351826	rs1351394		-1787843
cg05942111	RASSF3	12		HMGA2	12	66351826	rs1351394		-1307799
cg06378491	MAP4K2	11		HMGA2	12	66351826	rs1351394		-1787814
cg06500792	LOC400958	2		HMGA2	12	66351826	rs1351394		-1345208
cg07677157	RPSAP52	12		HMGA2	12	66351826	rs1351394		-300898
cg08958168	SLC12A4	16		HMGA2	12	66351826	rs1351394		1649589
cg09704401	SERTAD2	2		HMGA2	12	66351826	rs1351394		-1354828
cg10322443	MIR4708	14		HMGA2	12	66351826	rs1351394		-629241
cg10420527	LRP5	11		HMGA2	12	66351826	rs1351394		1786679
cg11115622	PLEKHG3	14		HMGA2	12	66351826	rs1351394		-1181868
cg13149245	PIF1	15		HMGA2	12	66351826	rs1351394		-1246326	Y
cg14209730	LGALSL	2		HMGA2	12	66351826	rs1351394		-1719190	Y
cg14550985	RIN1	11		HMGA2	12	66351826	rs1351394		-247667
cg18584067	SERTAD2	2		HMGA2	12	66351826	rs1351394		-1375910
cg20865778	TCIRG1	11		HMGA2	12	66351826	rs1351394		1459439
cg21221767	MAX	14		HMGA2	12	66351826	rs1351394		-678180
cg24058805	PDE4B	1		HMGA2	12	66351826	rs1351394		425753
cg25399309	MAST4	5		HMGA2	12	66351826	rs1351394		110467
cg26828842	SOCS6	18		HMGA2	12	66351826	rs1351394		1600260
cg26884581	PYGM	11		HMGA2	12	66351826	rs1351394		-1824412
cg00329157*	C3orf52	3		SH2B3	12	111884608	rs3184504		-39738
cg00382138	CFI	4		SH2B3	12	111884608	rs3184504		-1161309
cg02988730	AMPD2	1		SH2B3	12	111884608	rs3184504		-1717099	Y
cg03337886	IRS2	13		SH2B3	12	111884608	rs3184504		-1447868
cg04206967	TRHR	8		SH2B3	12	111884608	rs3184504		-1785764
cg06072822	MCF2L	13		SH2B3	12	111884608	rs3184504		1767461	Y
cg06673684	MCF2L	13		SH2B3	12	111884608	rs3184504		1762207	Y
cg07177115	IL36A	2		SH2B3	12	111884608	rs3184504		1878187	Y
cg09294084	MCF2L	13		SH2B3	12	111884608	rs3184504		1762124	Y
cg11067407	ZW10	11		SH2B3	12	111884608	rs3184504		1715244	Y
cg12259522	TEX29	13		SH2B3	12	111884608	rs3184504		426112	Y
cg12723026	KCNC4	1		SH2B3	12	111884608	rs3184504		-1120014
cg13430173	PALM2-AKAP2	9		SH2B3	12	111884608	rs3184504		1029541	Y
cg13631444	TRHR	8		SH2B3	12	111884608	rs3184504		-1785742
cg14105680	IL37	2		SH2B3	12	111884608	rs3184504		1791627	Y
cg14765414	MCF2L	13		SH2B3	12	111884608	rs3184504		1767727	Y
cg14839898*	TIMM8B	11		SH2B3	12	111884608	rs3184504		71754
cg15406387	ENPEP	4		SH2B3	12	111884608	rs3184504		-487276
cg15959363	C4orf32	4		SH2B3	12	111884608	rs3184504		1206731	Y
cg17036469	AMPD2	1		SH2B3	12	111884608	rs3184504		-1717018
cg21601493	IRS2	13		SH2B3	12	111884608	rs3184504		-1472430	Y
cg23364711	COL4A1	13		SH2B3	12	111884608	rs3184504		-1187788
cg24727480	KCTD10	12		SH2B3	12	111884608	rs3184504		-1983525
cg27485596*	ARHGEF7	13		SH2B3	12	111884608	rs3184504		-55078
cg02461269	ARID1B	6		KCNAB1	3	155829938	rs7629460		679936	Y
cg02855778	PTPRN2	7		KCNAB1	3	155829938	rs7629460		1632976	Y
cg02997316	LMNA	1		KCNAB1	3	155829938	rs7629460		263686	Y
cg03679544	TIAM2	6		KCNAB1	3	155829938	rs7629460		-291966
cg03996020	DNAJB6	7		KCNAB1	3	155829938	rs7629460		1350186	Y
cg05894462	PTPRN2	7		KCNAB1	3	155829938	rs7629460		1631187	Y
cg06535156	TIAM2	6		KCNAB1	3	155829938	rs7629460		-291883
cg07702888	RHBG	1		KCNAB1	3	155829938	rs7629460		508855	Y
cg09364590	TIAM2	6		KCNAB1	3	155829938	rs7629460		-292037
cg09379146	TIPARP	3		KCNAB1	3	155829938	rs7629460		565118	Y
cg09888330	SH2D2A	1		KCNAB1	3	155829938	rs7629460		956072	Y
cg10317026	EFNA3	1		KCNAB1	3	155829938	rs7629460		-773302
cg12036877	PMF1-BGLAP	1		KCNAB1	3	155829938	rs7629460		381958	Y
cg12593793	LMNA	1		KCNAB1	3	155829938	rs7629460		244197	Y
cg13282594	PMF1-BGLAP	1		KCNAB1	3	155829938	rs7629460		381671	Y
cg13904214	RBM33	7		KCNAB1	3	155829938	rs7629460		-273209	Y
cg16097041	FLAD1	1		KCNAB1	3	155829938	rs7629460		-864394
cg19449917	LINC00880	3		KCNAB1	3	155829938	rs7629460		993418	Y
cg21707172	TIAM2	6		KCNAB1	3	155829938	rs7629460		-291994
cg22441770	CRTC2	1		KCNAB1	3	155829938	rs7629460		-1900346
cg24707200	NTRK1	1		KCNAB1	3	155829938	rs7629460		1003225	Y
cg25383605	TIAM2	6		KCNAB1	3	155829938	rs7629460		-291891
cg02821342	LINC-PINT	7		L3MBTL3	6	130356608	rs9375694		436943
cg10430742	KCNJ1	11		L3MBTL3	6	130356608	rs9375694		-1661067
cg12103569	SFSWAP	12		L3MBTL3	6	130356608	rs9375694		1901952
cg13458609	ENG	9		L3MBTL3	6	130356608	rs9375694		252315
cg14527110	P4HA2	5		L3MBTL3	6	130356608	rs9375694		1204684
cg14731462	PTPRE	10		L3MBTL3	6	130356608	rs9375694		-567179	Y
cg16001165	JADE1	4		L3MBTL3	6	130356608	rs9375694		-774742
cg18334681	ENPP3	6		L3MBTL3	6	130356608	rs9375694		1709521
cg19843457	SFSWAP	12		L3MBTL3	6	130356608	rs9375694		1932003
cg20876852	MEST	7		L3MBTL3	6	130356608	rs9375694		-222120
cg21726551	ADGRD1	12		L3MBTL3	6	130356608	rs9375694		1233852
cg23415434	ARHGEF4	2		L3MBTL3	6	130356608	rs9375694		1442261
cg27292710	KCNJ5	11		L3MBTL3	6	130356608	rs9375694		-1584053
cg00162064	RNF220	1		GCK	7	44231778	rs2971669		766373
cg00233028	CD82	11		GCK	7	44231778	rs2971669		411136
cg01143068	STARD9	15		GCK	7	44231778	rs2971669		-1343599	Y
cg01820192	LINC00319	21		GCK	7	44231778	rs2971669		637984
cg02283735	PTPRF	1		GCK	7	44231778	rs2971669		-220191
cg02370100	ABCG1	21		GCK	7	44231778	rs2971669		-576522
cg02835421	IPO13	1		GCK	7	44231778	rs2971669		179791
cg03717364	HAAO	2		GCK	7	44231778	rs2971669		-1029297
cg03726147	DMAP1	1		GCK	7	44231778	rs2971669		454244
cg03753191	EPSTI1	13		GCK	7	44231778	rs2971669		-664876
cg04011671	HAAO	2		GCK	7	44231778	rs2971669		-1029304
cg04337944	FBLN1	22		GCK	7	44231778	rs2971669		1667525
cg05294455	MYL4	17		GCK	7	44231778	rs2971669		1054831
cg06560379*	NFKBIE	6		GCK	7	44231778	rs2971669		-473
cg07157107	CHRNA6	8		GCK	7	44231778	rs2971669		-1608048	Y
cg07858848	HAAO	2		GCK	7	44231778	rs2971669		-1144601	Y
cg08351131	HEXIM2	17		GCK	7	44231778	rs2971669		-989187
cg08627825	LINC00229	22		GCK	7	44231778	rs2971669		784286	Y
cg09220326	CDCP1	3		GCK	7	44231778	rs2971669		943643	Y
cg10469774	CD82	11		GCK	7	44231778	rs2971669		411154
cg13203135	C21orf33	21		GCK	7	44231778	rs2971669		1333550
cg13598409	KCNK15	20		GCK	7	44231778	rs2971669		-857539
cg16597079	TRERF1	6		GCK	7	44231778	rs2971669		-1846141
cg19523667	ZMIZ2	7		GCK	7	44231778	rs2971669		564002
cg19863740	PARVG	22		GCK	7	44231778	rs2971669		345091
cg21228424	PRPH2	6		GCK	7	44231778	rs2971669		-1553464
cg21516291	SLC35C2	20		GCK	7	44231778	rs2971669		747322	Y
cg22583147	TOPAZ1	3		GCK	7	44231778	rs2971669		100046
cg22778120	PRR5	22		GCK	7	44231778	rs2971669		862753	Y
cg24020157	RASGEF1A	10		GCK	7	44231778	rs2971669		-534257
cg25521481	TTBK1	6		GCK	7	44231778	rs2971669		-1017382
cg26413708	TRERF1	6		GCK	7	44231778	rs2971669		-1924970
cg27477277	TRPM2	21		GCK	7	44231778	rs2971669		1579654
cg27588384	LIMD1	3		GCK	7	44231778	rs2971669		1442503
cg02461269	ARID1B	6		EBF1	5	157894747	rs12520982		-1384873	Y
cg02855778	PTPRN2	7		EBF1	5	157894747	rs12520982		-431833	Y
cg02997316	LMNA	1		EBF1	5	157894747	rs12520982		-1801123	Y
cg03996020	DNAJB6	7		EBF1	5	157894747	rs12520982		-714623	Y
cg05894462	PTPRN2	7		EBF1	5	157894747	rs12520982		-433622	Y
cg07702888	RHBG	1		EBF1	5	157894747	rs12520982		-1555954	Y
cg09379146	TIPARP	3		EBF1	5	157894747	rs12520982		-1499691	Y
cg09888330	SH2D2A	1		EBF1	5	157894747	rs12520982		-1108737	Y
cg12036877	PMF1-BGLAP	1		EBF1	5	157894747	rs12520982		-1682851	Y
cg12593793	LMNA	1		EBF1	5	157894747	rs12520982		-1820612	Y
cg13282594	PMF1-BGLAP	1		EBF1	5	157894747	rs12520982		-1683138	Y
cg19449917	LINC00880	3		EBF1	5	157894747	rs12520982		-1071391	Y
cg24707200	NTRK1	1		EBF1	5	157894747	rs12520982		-1061584	Y
cg00831931*	TCF7L2	10		TCF7L2	10	114758349	rs7903146		64745
cg05799596	RASA3	13		TCF7L2	10	114758349	rs7903146		150984
cg06072822	MCF2L	13		TCF7L2	10	114758349	rs7903146		-1106280	Y
cg06673684	MCF2L	13		TCF7L2	10	114758349	rs7903146		-1111534	Y
cg07177115	IL36A	2		TCF7L2	10	114758349	rs7903146		-995554	Y
cg07795325	CAMK2D	4		TCF7L2	10	114758349	rs7903146		-200682
cg08530838	TRIM36	5		TCF7L2	10	114758349	rs7903146		-564491
cg09294084	MCF2L	13		TCF7L2	10	114758349	rs7903146		-1111617	Y
cg11067407	ZW10	11		TCF7L2	10	114758349	rs7903146		-1158497	Y
cg13430173	PALM2-AKAP2	9		TCF7L2	10	114758349	rs7903146		-1844200	Y
cg14105680	IL37	2		TCF7L2	10	114758349	rs7903146		-1082114	Y
cg14765414	MCF2L	13		TCF7L2	10	114758349	rs7903146		-1106014	Y
cg15959363	C4orf32	4		TCF7L2	10	114758349	rs7903146		-1667010	Y
cg16323245	ZBTB20	3		TCF7L2	10	114758349	rs7903146		-136231	Y
cg16476991*	RASA3	13		TCF7L2	10	114758349	rs7903146		73055
cg22164298	ANK2	4		TCF7L2	10	114758349	rs7903146		-481515	Y
cg23033749	ST7	7		TCF7L2	10	114758349	rs7903146		1851889
cg23999170	TSPAN2	1		TCF7L2	10	114758349	rs7903146		869762
cg24352369	CBWD2	2		TCF7L2	10	114758349	rs7903146		-595165
cg24635112	RASA3	13		TCF7L2	10	114758349	rs7903146		150552	Y
cg25936138	TRIM36	5		TCF7L2	10	114758349	rs7903146		-564617
cg25936358	ATP4B	13		TCF7L2	10	114758349	rs7903146		-456353
cg26230651	PAX8	2		TCF7L2	10	114758349	rs7903146		-709376
cg00587472	CMPK2	2		ACTL9	19	8787273	rs2918299		-1834413	Y
cg01515508	CASZ1	1		ACTL9	19	8787273	rs2918299		1940997
cg02473287	YWHAQ	2		ACTL9	19	8787273	rs2918299		965113
cg04968127	MRVI1	11		ACTL9	19	8787273	rs2918299		1927940
cg05012661	KIAA0232	4		ACTL9	19	8787273	rs2918299		-1896009
cg05460571	MFHAS1	8		ACTL9	19	8787273	rs2918299		-156909
cg07285708	TATDN2	3		ACTL9	19	8787273	rs2918299		1504051
cg07565042	RNF141	11		ACTL9	19	8787273	rs2918299		1756183
cg07565956	ZBTB4	17		ACTL9	19	8787273	rs2918299		-1405985	Y
cg11036672	TRMT44	4		ACTL9	19	8787273	rs2918299		-310838
cg11077681	MRVI1	11		ACTL9	19	8787273	rs2918299		1927915
cg12547807	SPSB1	1		ACTL9	19	8787273	rs2918299		686478	Y
cg14161821	KDM4C	9		ACTL9	19	8787273	rs2918299		-1831714
cg14992524	SOX7	8		ACTL9	19	8787273	rs2918299		1798862
cg15031409	CASZ1	1		ACTL9	19	8787273	rs2918299		1936357
cg15283950	MRVI1	11		ACTL9	19	8787273	rs2918299		1927944
cg15741354	SGK223	8		ACTL9	19	8787273	rs2918299		-641144
cg16014412	TMEM201	1		ACTL9	19	8787273	rs2918299		900198
cg17061862	WEE1	11		ACTL9	19	8787273	rs2918299		803158
cg19265972	ASGR1	17		ACTL9	19	8787273	rs2918299		-1706864
cg20014974	SLC45A1	1		ACTL9	19	8787273	rs2918299		-515355
cg20752878	ASGR1	17		ACTL9	19	8787273	rs2918299		-1706735
cg21249754	PTPN6	12		ACTL9	19	8787273	rs2918299		-1727067	Y
cg21554670	GAS7	17		ACTL9	19	8787273	rs2918299		1180144
cg23147227	PTPN6	12		ACTL9	19	8787273	rs2918299		-1727086
cg23623251	BMP6	6		ACTL9	19	8787273	rs2918299		-1055993	Y
cg25921609	MYH10	17		ACTL9	19	8787273	rs2918299		-408048
cg25963412	ACOX3	4		ACTL9	19	8787273	rs2918299		-374904
cg26003140	CCDC42	17		ACTL9	19	8787273	rs2918299		-175661	Y
cg00605777	SEMA4C	2		CYP3A7	7	99332948	rs45446698		-1799313
cg05925497	ARHGAP42	11		CYP3A7	7	99332948	rs45446698		1401146
cg06231285	LRCH4	7		CYP3A7	7	99332948	rs45446698		838800
cg07137429	PYROXD2	10		CYP3A7	7	99332948	rs45446698		760528	Y
cg08026735	VWA3B	2		CYP3A7	7	99332948	rs45446698		-629060
cg12781678	C7orf61	7		CYP3A7	7	99332948	rs45446698		720806
cg13740339	FBP1	9		CYP3A7	7	99332948	rs45446698		-1932191
cg16398956	EML1	14		CYP3A7	7	99332948	rs45446698		880010
cg18642369	DOCK9	13		CYP3A7	7	99332948	rs45446698		318283
cg19935065	DNTT	10		CYP3A7	7	99332948	rs45446698		-1270261
cg20784591	PILRA	7		CYP3A7	7	99332948	rs45446698		639513
cg22851200	TRIP6	7		CYP3A7	7	99332948	rs45446698		1132885
cg27139419	IGF1R	15		CYP3A7	7	99332948	rs45446698		-120544
