# Supplementary material for: Meta-analysis of epigenome-wide association studies in neonates reveals widespread differential DNA methylation associated with birthweight
Source: Nat Commun. 2019 Apr 23;10:1893. doi: 10.1038/s41467-019-09671-3 (PMC6478731; doi:10.1038/s41467-019-09671-3)
Supplement: Supplementary file 15 — Supplementary Data 12 [file 41467_2019_9671_MOESM15_ESM.xlsx]

## Sheet: SData12
Supplementary Data 12. The 98 expression quantitative trait methylation (cis-eQTM) sites for 82 of the 914 birthweight associated CpG sites Chr: chromosome
CpG	P value for association	Chr	CpG chr position	Probe name	Probe chromosome position	Gene for functional enrichment analysis
cg25311963	1.94e-16	1	1546643	ENSG00000189339	1624167	SLC35E2
cg25311963	8.32e-07	1	1546643	ENSG00000189409	1567474	MMP23B
cg25311963	5.52e-08	1	1546643	ENSG00000215914	1631369	MMP23A
cg25311963	4.19e-19	1	1546643	ENSG00000227775	1655951	-
cg13472584	2.94e-06	1	14056972	ENSG00000116731	14026693	PRDM2
cg09113483	3e-08	1	61517759	ENSG00000162599	61330931	NFIA
cg22877452	3.11e-08	1	61517876	ENSG00000162599	61330931	NFIA
cg23999170	7.51e-10	1	115628111	ENSG00000134198	115632121	TSPAN2
cg12593793	5.08e-18	1	156074135	ENSG00000160789	156052364	LMNA
cg21454485	1.44e-11	1	160546195	ENSG00000066294	160549306	CD84
cg21454485	1.73e-06	1	160546195	ENSG00000162739	160493052	SLAMF6
cg25215890	2.98e-06	1	160651404	ENSG00000117091	160681641	CD48
cg00222472	2.71e-07	1	164545783	ENSG00000185630	164524821	PBX1
cg00091302	0.0002257	1	182602986	ENSG00000135828	182558391	RNASEL
cg10117369	5.81e-08	1	203734208	ENSG00000122188	203734304	LAX1
cg17711527	2.66e-05	1	203734396	ENSG00000122188	203734304	LAX1
cg00942920	2.87e-05	1	203734511	ENSG00000122188	203734304	LAX1
cg09825327	8.98e-11	1	211503219	ENSG00000082512	211499957	TRAF5
cg15895197	6.93e-39	2	27301490	ENSG00000138080	27301435	EMILIN1
cg00605777	7.18e-11	2	97533635	ENSG00000168758	97536494	SEMA4C
cg23415434	6.71e-08	2	131798869	ENSG00000136002	131594489	ARHGEF4
cg03850035	8.2e-08	2	222367062	ENSG00000116106	222438922	EPHA4
cg20730966	7.46e-06	3	33095838	ENSG00000183813	32993066	CCR4
cg24973755	0.0002699	4	1304924	ENSG00000159674	1202750	SPON2
cg05119988	2.09e-07	4	166251189	ENSG00000052802	166248775	MSMO1
cg05575921	1.19e-06	5	373378	ENSG00000180104	443273	EXOC3
cg03335624	1.4e-05	5	73934894	ENSG00000171617	73937249	ENC1
cg23317857	8.43e-07	6	41696297	ENSG00000112561	41703997	TFEB
cg06560379	2.37e-08	6	44231305	ENSG00000146232	44233500	NFKBIE
cg05573767	0.0002045	6	167171394	ENSG00000071242	167319939	RPS6KA2
cg04396112	0.0001684	7	2150959	ENSG00000002822	2272878	MAD1L1
cg22962123	5.86e-06	7	27153605	ENSG00000105991	27135615	HOXA1
cg22851200	4.17e-13	7	100465785	ENSG00000087077	100464760	TRIP6
cg05814312	0.0001862	10	29760639	ENSG00000224597	29698331	SVIL-AS1
cg14001239	8.31e-05	10	29771695	ENSG00000224597	29698331	SVIL-AS1
cg15331996	7.89e-08	10	73848830	ENSG00000107742	73848790	SPOCK2
cg14785527	1.89e-08	10	90656978	ENSG00000138134	90639491	STAMBPL1
cg24024833	0.0001695	11	1892608	ENSG00000184682	1912084	PRR33
cg27389255	3.52e-06	11	14664598	ENSG00000152270	14665269	PDE3B
cg01400685	7.83e-09	11	61597977	ENSG00000134824	61560452	FADS2
cg01400685	4.92e-07	11	61597977	ENSG00000149485	61596790	FADS1
cg25324164	1.33e-05	11	61598330	ENSG00000149485	61596790	FADS1
cg00350296	1.94e-29	11	66084793	ENSG00000174807	66084515	CD248
cg02431260	0.0002705	11	124628888	ENSG00000019102	124622134	VSIG2
cg10430742	0.0001821	11	128695493	ENSG00000134954	128457437	ETS1
cg05512157	8.53e-06	12	50901830	ENSG00000066084	50898768	DIP2B
cg13937905	9.84e-07	12	53612503	ENSG00000139626	53601091	ITGB7
cg13937905	1.18e-20	12	53612503	ENSG00000172819	53626764	RARG
cg20359445	1.47e-06	12	56415591	ENSG00000123411	56401443	IKZF4
cg24727480	2.1e-05	12	109901035	ENSG00000110906	109915349	KCTD10
cg12103569	6.47e-09	12	132258512	ENSG00000198598	132312938	MMP17
cg03753191	1.33e-21	13	43566902	ENSG00000133106	43566407	EPSTI1
cg16476991	1.92e-05	13	114831356	ENSG00000185989	114898086	RASA3
cg05799596	5.77e-05	13	114909285	ENSG00000185989	114898086	RASA3
cg03048432	1.44e-07	14	51290703	ENSG00000100503	51297839	NIN
cg03048432	1.02e-05	14	51290703	ENSG00000270062	51190990	-
cg00971695	4.37e-06	14	65169664	ENSG00000126822	65170820	PLEKHG3
cg23883632	1.03e-11	14	71174292	ENSG00000133985	71108504	TTC9
cg10814005	2.22e-10	14	91711041	ENSG00000119714	91720269	GPR68
cg07452706	5.57e-10	14	105649097	ENSG00000183828	105647660	NUDT14
cg07452706	0.0002073	14	105649097	ENSG00000184916	105635161	JAG2
cg10084993	1.62e-07	16	2077599	ENSG00000065054	2075357	SLC9A3R2
cg08404702	8.4e-05	16	2133340	ENSG00000065054	2075357	SLC9A3R2
cg02106534	1.27e-08	16	4561497	ENSG00000089486	4588829	CDIP1
cg07248377	8.16e-07	16	4732358	ENSG00000067836	4852951	ROGDI
cg16520815	6.19e-05	16	4733133	ENSG00000067836	4852951	ROGDI
cg09109520	0.0002735	16	57673210	ENSG00000140859	57896957	KIFC3
cg08958168	0.000183	16	68001367	ENSG00000213398	67978034	LCAT
cg08305942	0.0001052	16	79692306	ENSG00000178573	79634611	MAF
cg04069539	1.1e-08	16	89168915	ENSG00000176715	89154783	ACSF3
cg24173182	7.26e-09	17	1961238	ENSG00000177374	1957448	HIC1
cg07565956	2.74e-06	17	7381240	ENSG00000174282	7387582	ZBTB4
cg12655416	3e-08	17	38077822	ENSG00000073605	38076107	GSDMB
cg12655416	1.45e-21	17	38077822	ENSG00000172057	38083854	ORMDL3
cg07313882	1.24e-17	17	76121348	ENSG00000141524	76128488	TMC6
cg19914554	0.0001126	17	80275401	ENSG00000141551	80231607	CSNK1D
cg18598117	0.0002032	19	941126	ENSG00000172232	825097	AZU1
cg01294327	9.15e-05	19	2291325	ENSG00000130332	2328615	LSM7
cg17714703	0.0001459	19	4912173	ENSG00000034063	4903092	-
cg17714703	0.0002724	19	4912173	ENSG00000205784	4902879	ARRDC5
cg22030032	4.59e-05	19	41312792	ENSG00000090006	41098789	LTBP4
cg04830471	3.23e-05	19	49890365	ENSG00000104894	49838428	CD37
cg07815836	5.34e-17	19	58715351	ENSG00000121413	58629794	ZSCAN18
cg07815836	7.87e-06	19	58715351	ENSG00000166704	58514717	ZNF606
cg07815836	3.67e-25	19	58715351	ENSG00000171606	58694396	ZNF274
cg07815836	7.79e-11	19	58715351	ENSG00000176593	58513429	LOC100128398
cg07815836	2.41e-10	19	58715351	ENSG00000181894	58666477	ZNF329
cg20519581	4.6e-05	20	48959796	ENSG00000224397	48884023	-
cg08854834	2.46e-08	21	30517893	ENSG00000156265	30449792	MAP3K7CL
cg02370100	2.67e-06	21	43655208	ENSG00000160179	43619799	ABCG1
cg13203135	1.47e-05	21	45565280	ENSG00000141959	45719934	PFKL
cg13203135	2.54e-13	21	45565280	ENSG00000160221	45553487	C21orf33
cg13203135	0.0001751	21	45565280	ENSG00000267913	45593580	-
cg08422803	2.21e-05	21	46341067	ENSG00000197381	46493768	ADARB1
cg01264106	1.65e-09	22	38071554	ENSG00000100097	38071615	LGALS1
cg16000331	2.49e-26	22	42230090	ENSG00000198911	42229109	SREBF2
cg19863740	2.65e-05	22	44576821	ENSG00000138964	44568836	PARVG
cg08447200	7.51e-05	22	50617460	ENSG00000073150	50609160	PANX2
