# Supplementary material for: Meta-analysis of epigenome-wide association studies in neonates reveals widespread differential DNA methylation associated with birthweight
Source: Nat Commun. 2019 Apr 23;10:1893. doi: 10.1038/s41467-019-09671-3 (PMC6478731; doi:10.1038/s41467-019-09671-3)
Supplement: Supplementary file 16 — Supplementary Data 13 [file 41467_2019_9671_MOESM16_ESM.xlsx]

## Sheet: SData13
Supplementary Data 13. Associations between gene expression and methylation in INMA and the Gambia (FDR<0.05) Chr: chromosome
	CpG	Transcript probe ID	Expressed Gene	Coef	SE	P value	FDR value	nearestgene	Chr	95% CI
INMA	cg21454485	TC01003405.hg.1	CD84	-1.48366	0.329498	1.70218e-05	0.0167049	CD84	1	-2.13; -0.84
	cg10073091	TC01002694.hg.1	DHCR24	-2.03062	0.486506	6.08047e-05	0.0437642	DHCR24	1	-2.98; -1.08
	cg27168858	TC01002694.hg.1	DHCR24	-0.783694	0.190286	7.48939e-05	0.048234	DHCR24	1	-1.16; -0.41
	cg17901584	TC01002694.hg.1	DHCR24	-1.29264	0.243933	6.20395e-07	0.00142064	DHCR24	1	-1.77; -0.81
	cg02835421	TC01000556.hg.1	B4GALT2	-0.957498	0.211106	1.49421e-05	0.0162074	IPO13	1	-1.37; -0.54
	cg10117369	TC01001692.hg.1	ZBED6	-0.648085	0.147594	2.64147e-05	0.0236688	LAX1	1	-0.94; -0.36
	cg25311963	TC01005212.hg.1	-	3.28691	0.639866	1.24831e-06	0.00233877	MIB2	1	2.03; 4.54
	cg04031093	TC01001926.hg.1	NTPCR	-1.04083	0.244006	4.28906e-05	0.03281	NTPCR	1	-1.52; -0.56
	cg13869942	TC01003238.hg.1	THEM4	-0.975553	0.206747	7.15481e-06	0.00970295	THEM4	1	-1.38; -0.57
	cg22123711	TC01002206.hg.1	-	4.11838	0.87515	7.53298e-06	0.00970295	TNFRSF8	1	2.4; 5.83
	cg23032421	TC03001122.hg.1	IL5RA	-5.94573	1.09523	3.52079e-07	0.00120146	IL5RA	3	-8.09; -3.8
	cg03335624	TC05001481.hg.1	ENC1	-1.70645	0.321939	6.16649e-07	0.00142064	ENC1	5	-2.34; -1.08
	cg03335624	TC05003082.hg.1	-	-3.3998	0.792787	3.92971e-05	0.032395	ENC1	5	-4.95; -1.85
	cg26889659	TC06001207.hg.1	EXOC2	-0.194756	0.0447736	3.10049e-05	0.0266242	EXOC2	6	-0.28; -0.11
	cg10735015	TC06003106.hg.1	-	-0.918047	0.221209	6.65009e-05	0.0442102	PHACTR2	6	-1.35; -0.48
	cg05573767	TC06004058.hg.1	RNASET2	0.707888	0.143297	2.86897e-06	0.00483586	RPS6KA2	6	0.43; 0.99
	cg05573767	TC06002312.hg.1	MIR3939	2.66893	0.517872	1.16191e-06	0.00233877	RPS6KA2	6	1.65; 3.68
	cg05573767	TC06003199.hg.1	-	0.998161	0.208292	5.29583e-06	0.00779584	RPS6KA2	6	0.59; 1.41
	cg05573767	TC06003995.hg.1	-	0.96793	0.171747	1.40368e-07	0.000723213	RPS6KA2	6	0.63; 1.3
	cg10421188	TC07002222.hg.1	CREB5	-3.5427	0.79673	2.12516e-05	0.019908	CREB5	7	-5.1; -1.98
	cg01400685	TC11000542.hg.1	FADS2	-2.17583	0.324876	9.88927e-10	2.03808e-05	FADS2	11	-2.81; -1.54
	cg25324164	TC11000542.hg.1	FADS2	-2.13568	0.433612	3.05042e-06	0.00483586	FADS2	11	-2.99; -1.29
	cg21609804	TC11000577.hg.1	MARK2	-1.02387	0.222551	1.15265e-05	0.0131972	MARK2	11	-1.46; -0.59
	cg20865778	TC11000703.hg.1	NDUFS8	2.53556	0.551115	1.15182e-05	0.0131972	TCIRG1	11	1.46; 3.62
	cg23975840	TC12002596.hg.1	-	-1.67215	0.370343	1.62091e-05	0.0167027	MAP1LC3B2	12	-2.4; -0.95
	cg03753191	TC13000612.hg.1	EPSTI1	-9.90837	2.41272	7.82674e-05	0.0488792	EPSTI1	13	-14.64; -5.18
	cg04070976	TC17000857.hg.1	MYO15B	-0.917017	0.169971	4.08086e-07	0.00120146	LLGL2	17	-1.25; -0.58
	cg04070976	TC17002362.hg.1	MYO15B	-1.04639	0.191504	3.01315e-07	0.00120146	LLGL2	17	-1.42; -0.67
	CpG	Transcript probe ID	Expressed Gene	Coef	SE	P value	FDR	nearestgene	Chr	95% CI
Gambia	cg21785384	ILMN_2347789	C4BPB	-0.857384	0.16265	1.07567e-06	0.00982128	HUCEP11	1	-1.18, -0.54
	cg03875678	ILMN_1731233	GZMH	-10.2785	1.95591	1.14903e-06	0.00982128	CCPI	14	-14.11, -6.44
