# Supplementary material for: Meta-analysis of epigenome-wide association studies in neonates reveals widespread differential DNA methylation associated with birthweight
Source: Nat Commun. 2019 Apr 23;10:1893. doi: 10.1038/s41467-019-09671-3 (PMC6478731; doi:10.1038/s41467-019-09671-3)
Supplement: Supplementary file 17 — Supplementary Data 14 [file 41467_2019_9671_MOESM17_ESM.xlsx]

## Sheet: SData14
Supplementary Data 14. All 147 methylation quantitative trait loci for 126 of the 914 birthweight-related CpGs All mQTLs are obtained from the mQTL database (mqtldb.org), are measured at birth and are in cis with the CpG.
SNP	CpG	Coef	P value	SE	SNP chr	SNP position	Gene
rs1002991	cg20370909	-0.525631	9.87517e-16	0.0661762	7	4861021	RADIL
rs10082484	cg14001239	0.399713	7.77078e-17	0.0484367	10	29715461	SVIL
rs10092931	cg10090414	0.66084	4.26837e-52	0.0436424	8	142307201
rs1039320	cg03335624	-0.5999	4.56995e-28	0.0549304	5	73927752	ENC1
rs10421221	cg06870470	-0.3692	2.85369e-27	0.0343331	19	11316547	DOCK6
rs1043897	cg03144619	-0.438709	6.4397e-25	0.0428351	1	230416399	GALNT2
rs10795575	cg02449762	0.4166	6.76199e-21	0.0447764	10	5660221
rs10815489	cg14161821	0.4411	6.92007e-24	0.044068	9	6958408	KDM4C
rs11007607	cg05814312	-0.3934	4.87181e-15	0.0508101	10	29759225	SVIL
rs1107832	cg15741354	0.2991	8.04361e-13	0.0423368	8	8146083
rs11122469	cg03144619	-0.403479	6.3897e-18	0.0472144	1	230355248	GALNT2
rs11147139	cg22149555	-0.4499	1.25679e-21	0.0474518	12	133457651
rs11147302	cg14751481	0.4853	2.42818e-35	0.0392948	12	133013636
rs113819367	cg01877936	0.5863	1.13514e-14	0.076798	6	4235295
rs113919684	cg14154456	-0.5337	5.49147e-27	0.0499114	6	82894164	IBTK
rs115340020	cg09935388	-1.136	1.9836e-16	0.139565	1	92766438	GFI1
rs116981456	cg11125758	-1.182	1.51974e-11	0.177888	14	83631839
rs11731274	cg05012661	0.7299	3.11318e-49	0.0496451	4	6891455
rs1190621	cg14550985	0.8094	1.87123e-31	0.0697263	11	66090307	RIN1
rs12019224	cg05057834	-0.236728	7.0589e-09	0.0417366	3	37515341	ITGA9
rs1202672	cg05573767	-0.497573	1.8727e-30	0.0436101	6	167171375	RPS6KA2
rs12130589	cg00558749	0.4278	1.04759e-10	0.0673256	1	1732627
rs12219561	cg00694258	0.791	5.37582e-26	0.075482	10	31997937
rs12414407	cg09119776	-0.4415	5.01686e-23	0.0449976	10	104387019	SUFU
rs12484609	cg13251842	-0.3598	3.16153e-17	0.0430432	22	46450297	MIRLET7A3
rs12484609	cg13251842	-0.3598	3.16153e-17	0.0430432	22	46450297	LOC400931
rs12484609	cg13251842	-0.3598	3.16153e-17	0.0430432	22	46450297	MIRLET7B
rs12493782	cg14975410	-0.5942	4.32907e-29	0.0533724	3	171179779
rs12588099	cg12149606	0.2535	3.55162e-08	0.0470443	14	75594462	TMED10
rs12746961	cg21684021	-0.4479	4.22237e-08	0.0836046	1	109800321	CELSR2
rs12749123	cg25215890	-0.7685	5.76783e-19	0.0871402	1	160673143	CD48
rs12911385	cg13888509	0.2192	4.96601e-11	0.03389	15	74493886	STRA6
rs12972567	cg06462065	-0.2718	1.82459e-09	0.0460728	19	55889802
rs13070846	cg11370064	0.934	6.17626e-26	0.0892398	3	78281141
rs13110612	cg04460609	0.3166	1.41113e-10	0.0501883	4	16532875	LDB2
rs13261848	cg10090414	0.238906	5.42526e-09	0.0417897	8	142328719
rs13294483	cg14548802	0.5463	8.01845e-20	0.0604485	9	137675994	COL5A1
rs13335485	cg06478823	0.6426	1.31615e-25	0.0618224	16	20819495	ACSM3
rs139919499	cg14251267	-0.849221	4.02051e-21	0.0907374	20	62403271	ZBTB46
rs143999414	cg26104196	-0.7794	1.16449e-41	0.0578592	1	159914119	IGSF9
rs147984352	cg12781678	-0.3675	7.93654e-16	0.0461107	7	100092377
rs1659493	cg16520815	0.2489	4.13084e-08	0.0464251	16	4725863	MGRN1
rs17179976	cg16875057	0.5166	4.88338e-13	0.0724163	2	169006217	STK39
rs17227306	cg05057834	0.339081	1.97277e-09	0.0576035	3	37517067	ITGA9
rs17389605	cg08381620	1.292	1.48053e-54	0.0833002	13	24062817
rs174559	cg25324164	-0.3	5.40991e-12	0.0441491	11	61581656	FADS2
rs17608925	cg12655416	0.3831	9.07901e-13	0.0543563	17	38082831	ORMDL3
rs1769256	cg13740339	0.6767	7.88733e-19	0.0770377	9	97366935	FBP1
rs179762	cg08282819	-0.421	1.15261e-15	0.0531317	16	27437971	IL21R
rs1890361	cg26889659	-0.362555	1.69893e-10	0.0577368	6	680678	EXOC2
rs1977151	cg22877366	0.2354	2.36589e-08	0.0431048	1	12095076
rs199622321	cg14001239	0.391683	4.02096e-08	0.072991	10	29719695	SVIL
rs200163963	cg25376651	0.664	5.83842e-11	0.10305	13	32524870	EEF1DP3
rs200168344	cg04031093	-0.388286	4.37155e-17	0.046665	1	233072086
rs200649325	cg04304130	0.4041	2.99958e-15	0.0517814	6	11137061	LOC221710
rs200649325	cg04304130	0.4041	2.99958e-15	0.0517814	6	11137061	HERV-FRD
rs200848143	cg20370909	1.01428	2.56571e-18	0.117252	7	4839623	RADIL
rs200982136	cg07815836	-0.477	3.52582e-31	0.0412846	19	58700025	ZNF274
rs202234263	cg11659663	0.2585	3.93778e-10	0.0420502	11	63724677	MACROD1
rs2035135	cg04522498	0.4061	7.54905e-16	0.0509144	8	140902142	TRAPPC9
rs2055711	cg13742400	-0.4848	6.47347e-28	0.0445203	2	225767821	DOCK10
rs2079431	cg17725019	0.4362	5.32005e-38	0.0339891	22	31564334	PIK3IP1
rs2235203	cg04337944	-0.5215	8.65267e-33	0.0439408	22	45899655	FBLN1
rs2235578	cg08032483	0.305453	3.70668e-15	0.0392753	16	1498197	CCDC154
rs2235578	cg08032483	0.305453	3.70668e-15	0.0392753	16	1498197	CLCN7
rs2239725	cg17758673	-0.3556	3.31712e-19	0.0400411	4	3305739	RGS12
rs2273843	cg03875678	0.4993	3.92157e-12	0.0729823	14	25103409	GZMB
rs2280096	cg01307174	0.2782	5.99626e-13	0.039153	3	35712071	ARPP-21
rs2300385	cg05056497	-0.3432	1.22042e-15	0.0433519	21	35900932	RCAN1
rs2540168	cg12036877	0.3599	2.45696e-12	0.0520987	1	156223823	BGLAP
rs255052	cg08958168	-0.462	6.23915e-20	0.0509661	16	68024995	SLC12A4
rs2735832	cg08264519	-0.2806	4.65847e-11	0.0433183	14	105743905	BRF1
rs28397246	cg22246785	0.3432	4.00923e-13	0.0479273	12	122019849
rs28429906	cg27089226	0.8451	1.29463e-80	0.0445303	3	195906747
rs28495242	cg19358373	-0.4768	2.01455e-25	0.0460515	12	133447804
rs28520411	cg26995224	0.4489	1.19501e-27	0.0414365	12	121973317	KDM2B
rs28536011	cg25199005	-0.2486	7.64598e-09	0.0439358	1	246410789	SMYD3
rs2995005	cg24953596	0.6274	6.91666e-18	0.0734961	1	3513880	MEGF6
rs3000075	cg06937357	0.2726	8.72755e-10	0.0452833	14	105713219	PACS2
rs3087456	cg01351032	-0.3575	1.35982e-13	0.0489217	16	10970902	CIITA
rs3134102	cg04206967	0.4476	4.63479e-28	0.0409897	8	110093634	TRHR
rs3134102	cg13631444	0.5206	1.63224e-32	0.0440625	8	110093634	TRHR
rs34712518	cg07313882	0.6943	1.67769e-19	0.0775202	17	76121031	TMC6
rs34794298	cg02355304	0.5587	1.80871e-20	0.0607357	7	5535865	MIR589
rs34794298	cg02355304	0.5587	1.80871e-20	0.0607357	7	5535865	FBXL18
rs34892354	cg23902550	-0.3495	3.1956e-08	0.0646325	8	144690648	EEF1D
rs34892354	cg23902550	-0.3495	3.1956e-08	0.0646325	8	144690648	TIGD5
rs35760652	cg06996175	-0.7308	7.41732e-24	0.0730605	19	2546434	GNG7
rs36015371	cg00227665	0.4591	3.48902e-17	0.0549991	16	87747204	LOC100129637
rs3758681	cg02232751	-0.2632	3.09531e-10	0.0425511	11	18429450	LDHA
rs3800876	cg09174162	-0.31931	8.10632e-11	0.0499429	7	2117309	MAD1L1
rs4018202	cg06775523	-0.5317	9.08743e-22	0.0558803	1	3516780	MEGF6
rs4258351	cg08787968	0.4427	1.56927e-12	0.0635025	11	32446135	WT1
rs4959380	cg26889659	-0.492317	2.76687e-15	0.0630033	6	684269	EXOC2
rs55714927	cg19265972	0.3745	2.3572e-13	0.0517745	17	7080316	ASGR1
rs55957723	cg01515508	0.5202	2.81738e-31	0.0449487	1	10727861	CASZ1
rs56291663	cg19520763	-0.2978	3.44855e-16	0.0368915	3	38526166
rs57696383	cg15206445	-0.2529	1.83871e-08	0.0459344	16	89572665	SPG7
rs59349147	cg05294455	-0.5104	1.60998e-13	0.0700631	17	45289095	MYL4
rs597021	cg27168858	0.2837	1.59661e-10	0.0451098	1	55339438	DHCR24
rs60934932	cg17276535	0.4331	5.43697e-37	0.0342311	4	3342489	RGS12
rs61896141	cg01400685	-0.3831	4.98248e-14	0.0514825	11	61556039	FADS2
rs62327808	cg14717666	-0.311852	1.84676e-09	0.0528799	4	119892085	SYNPO2
rs62438431	cg13599248	-0.9965	1.12016e-32	0.0841168	6	74323377	SLC17A5
rs6510683	cg19851563	-0.815274	1.59944e-29	0.072653	19	2547015	GNG7
rs659268	cg06967124	0.5462	2.41078e-33	0.0456128	5	180041208	FLT4
rs6667564	cg00205605	0.4536	1.96608e-30	0.0397708	1	2520302
rs6672166	cg19827875	0.5155	7.98962e-30	0.0456895	1	201502592	NAV1
rs6680886	cg17711527	0.4927	6.56311e-26	0.0471013	1	203733826	LAX1
rs676374	cg00091302	-0.4448	5.13492e-17	0.0535799	1	182601940
rs702874	cg06500792	0.3583	1.41621e-26	0.0337868	2	65005540
rs7108339	cg20204986	0.3455	2.15319e-11	0.052403	11	32434626	WT1
rs7124169	cg02462416	-0.4476	3.59655e-17	0.0536445	11	2040997
rs7124169	cg02704502	-0.3744	1.47465e-13	0.0513109	11	2040997
rs7129689	cg15700009	-0.2779	2.97881e-10	0.0448838	11	18414888	LDHA
rs71325467	cg14251267	-0.250654	2.83662e-08	0.0461711	20	62405408	ZBTB46
rs71753628	cg05573767	0.371752	9.48934e-21	0.0401116	6	167403551	RPS6KA2
rs72788087	cg10453071	0.5805	6.94697e-09	0.102296	16	57513752	DOK4
rs73038485	cg09174162	1.44826	1.60536e-38	0.112042	7	2149835	MAD1L1
rs73038485	cg04396112	1.52734	5.21466e-49	0.104132	7	2149835	MAD1L1
rs731140	cg04396112	0.324731	1.55594e-16	0.0397521	7	2152001	MAD1L1
rs7312259	cg23829395	-0.2893	3.77865e-12	0.0422539	12	46791534
rs73960399	cg23415434	-0.6849	1.63799e-18	0.0787108	2	131795624	ARHGEF4
rs74073660	cg13594630	0.5047	2.27316e-13	0.0697271	12	32108677
rs74592588	cg09340403	-1.037	6.61258e-16	0.129747	6	138247479
rs7536151	cg10117369	0.3955	1.63082e-17	0.046878	1	203735332	LAX1
rs7797217	cg23033749	0.6318	1.04254e-38	0.0487531	7	116610237	ST7
rs78154784	cg11303839	0.4745	3.58457e-24	0.0470995	7	75405716	CCL26
rs7939541	cg17061862	0.5066	1.81007e-40	0.0381864	11	9590389
rs7960700	cg10665891	0.521	1.11356e-24	0.0511351	12	117039310
rs7960700	cg23975840	0.3637	4.22793e-15	0.0468652	12	117039310
rs79655198	cg14717666	0.992503	1.06615e-24	0.0973717	4	119856816	SYNPO2
rs79943252	cg02577963	-0.5351	3.39249e-12	0.0779789	19	5046580	KDM4B
rs80085145	cg08274637	-0.9016	2.23462e-21	0.0957014	13	51371073	DLEU7
rs816956	cg09990613	0.4428	8.53171e-22	0.0465051	20	62689037	TCEA2
rs876106	cg10078415	0.5518	3.38109e-20	0.0604289	16	20694194	ACSM3
rs876106	cg00394823	0.4875	1.94986e-15	0.0620378	16	20694194	ACSM3
rs879253	cg07340025	0.3449	3.51931e-15	0.0443101	5	14794868
rs928948	cg21609804	-0.432	1.42583e-26	0.0407389	11	63639881	MARK2
rs9304895	cg19851563	0.238108	3.53879e-08	0.0441825	19	2547681	GNG7
rs930665	cg15233611	-0.349	6.60717e-12	0.0515794	12	122245831	SETD1B
rs9424614	cg04031093	-0.552757	7.37428e-12	0.0818856	1	233043347
rs9535566	cg24013213	-0.5413	7.64134e-22	0.0567818	13	51640425	GUCY1B2
rs9563015	cg13928490	0.2962	4.93458e-10	0.0484659	13	51642314	GUCY1B2
rs9921	cg08032483	-0.821897	1.4051e-21	0.0867936	16	1495475	CCDC154
rs9921	cg08032483	-0.821897	1.4051e-21	0.0867936	16	1495475	CLCN7
rs9983590	cg05349624	0.7994	4.00526e-30	0.0704736	21	46852243	COL18A1
